# Supplementary material
Source: PubMed Central journal article supplement (PMC5296225)
Supplement: NIHMS828372-supplement-1.pdf [file NIHMS828372-supplement-1.pdf]

# Oligonucleotide Transition State Analogues of Saporin L3

## Supporting Information

*Jennifer M. Mason<sup>a\*</sup>, Hongling Yuan<sup>b</sup>, Gary B. Evans<sup>a</sup>, Peter C. Tyler<sup>a</sup>, Quan Du<sup>b</sup> and Vern L. Schramm<sup>b</sup>*

<sup>a</sup>The Ferrier Institute, Victoria University of Wellington, 69 Gracefield Rd, Lower Hutt 5010, New Zealand

<sup>b</sup>Department of Biochemistry, Albert Einstein College of Medicine, 1300 Morris Park Ave., Bronx, NY 10461, USA

$^1\text{H}$  NMR  
500 MHz

Owner pct  
Sample PTG1a-124  
Platform 355  
Job No 35566454

Current Data Parameters  
NAME ptg1a124  
EXPNO 10  
PROCNO 1  
F2 - Acquisition Parameters  
Date\_ 20121103  
Time 7.50  
INSTRUM spect  
PROBHD 5 mm PARBO BB-  
PULPROG zgpg30  
TD 65536  
SOLVENT CDCl3  
NS 32  
DS 2  
SWH 18302.198 Hz  
FIDRES 0.157199 Hz  
AQ 3.1806805 sec  
RG 144  
DW 48.533 usec  
DE 10.80 usec  
TE 303.2 K  
DL 1.9000800 sec  
TD0 1

----- CHANNEL f1 -----  
SFO1 18  
P1 18.00 usec  
PL1 -2.00 dB  
PL1W 23.55579948 W  
SFO1 499.8420867 MHz  
F2 - Processing parameters  
SI 32768  
SF 499.8400005 MHz  
WDW EM  
SSB 0  
LB 0.30 Hz  
GB 0  
PC 1.00

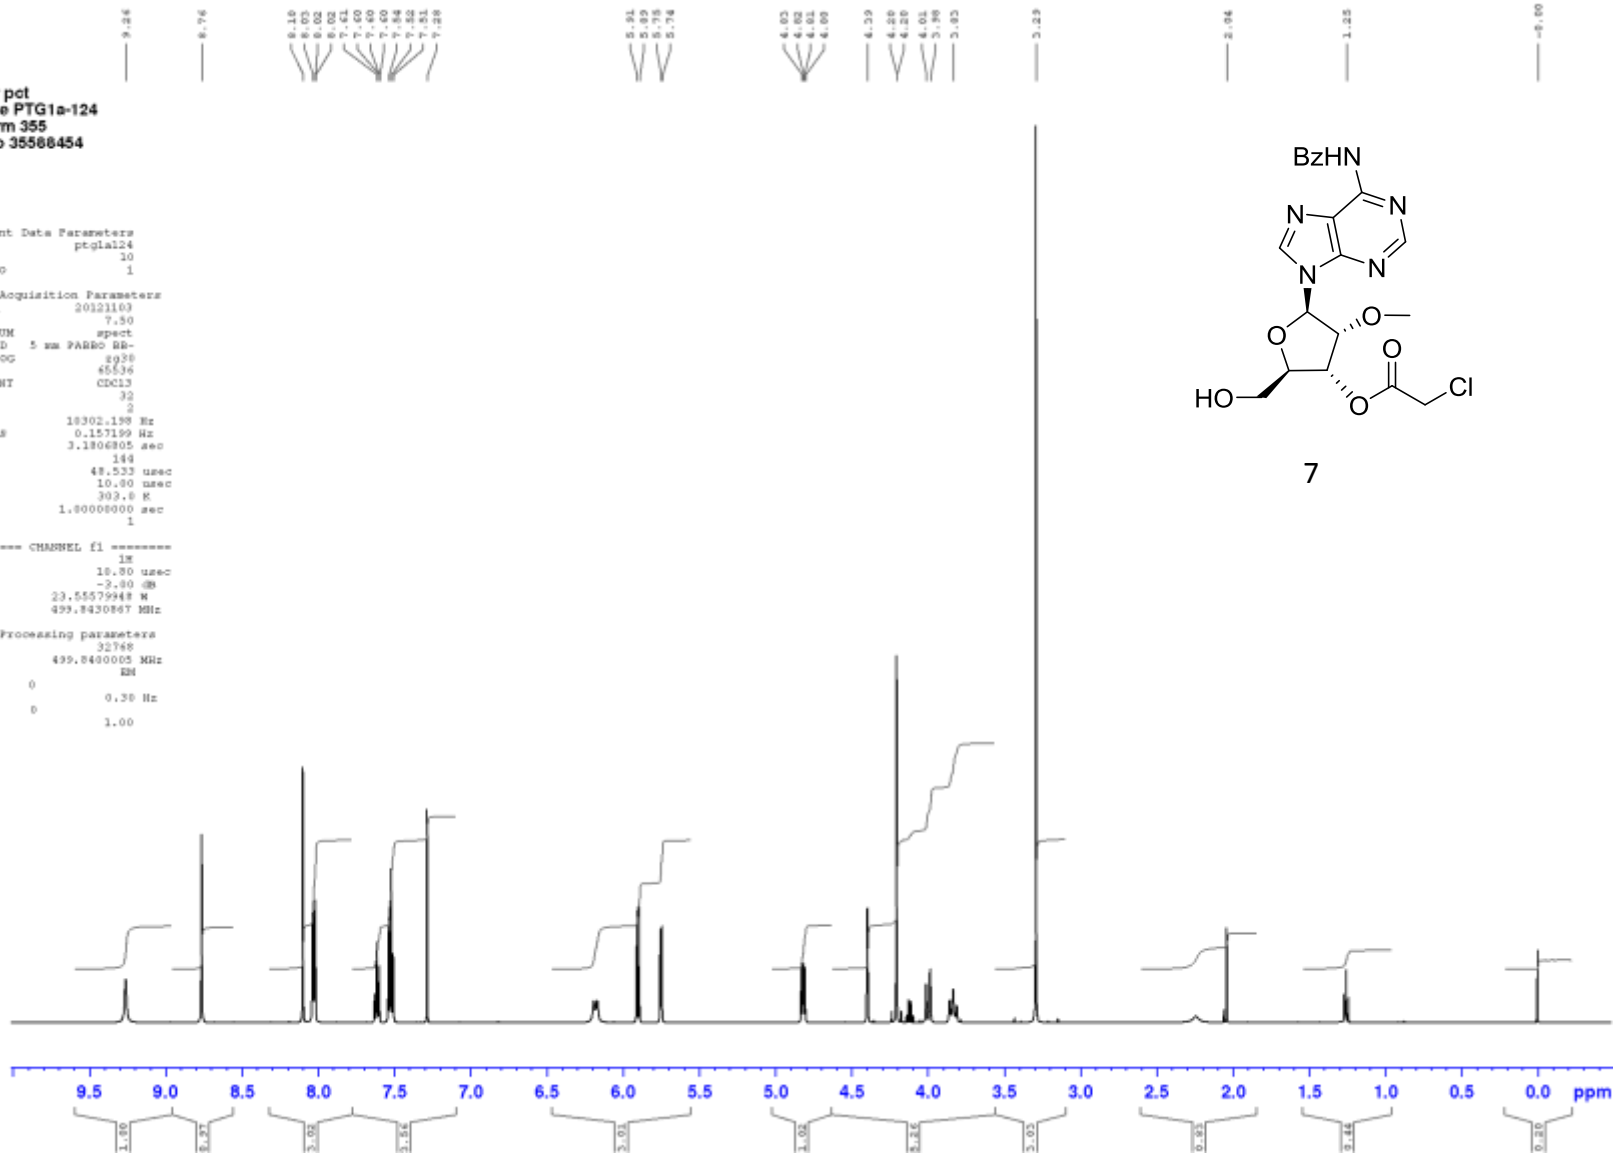

<sup>13</sup>C NMR  
126 MHz

Owner pct  
Sample FTG1a-124  
Platform 355  
Job No 35588454

Current Data Parameters  
NAME pgl124  
EXPNO 11  
PROCNO 3

F2 - Acquisition Parameters  
Date\_ 2011103  
Time 8.47  
INSTRUM spect  
PROBHD 5 mm PABBO 50-  
PULPROG zgpg30  
ID 65556  
SOLVENT CDCl3  
NS 2048  
DS 4  
SWH 31254.004 Hz  
FIDRES 0.474827 Hz  
AQ 1.0485740 sec  
RG 2850  
DW 16.009 usec  
DE 10.08 usec  
TE 303.0 K  
D1 0.8000000 sec  
D11 0.3300000 sec  
TD0 1

===== CHANNEL f1 =====  
NUC1 13C  
P1 11.09 usec  
PL1 0.00 dB  
PL1W 31.7249207 W  
RF01 125.690648 MHz

===== CHANNEL f2 =====  
CPDPRG12 waltz16  
NUC2 1H  
PCPD0 80.00 usec  
PL2 -9.00 dB  
PL12 14.39 dB  
PL13 17.35 dB  
PL2W 28.5507994 W  
PL12W 0.4294320 W  
PL13W 0.19146975 W  
RF02 499.9419994 MHz

F2 - Processing parameters  
SI 32768  
SF 125.688480 MHz  
WDW EM  
SSB 0  
LB 5.00 Hz  
GB 0  
PC 1.40

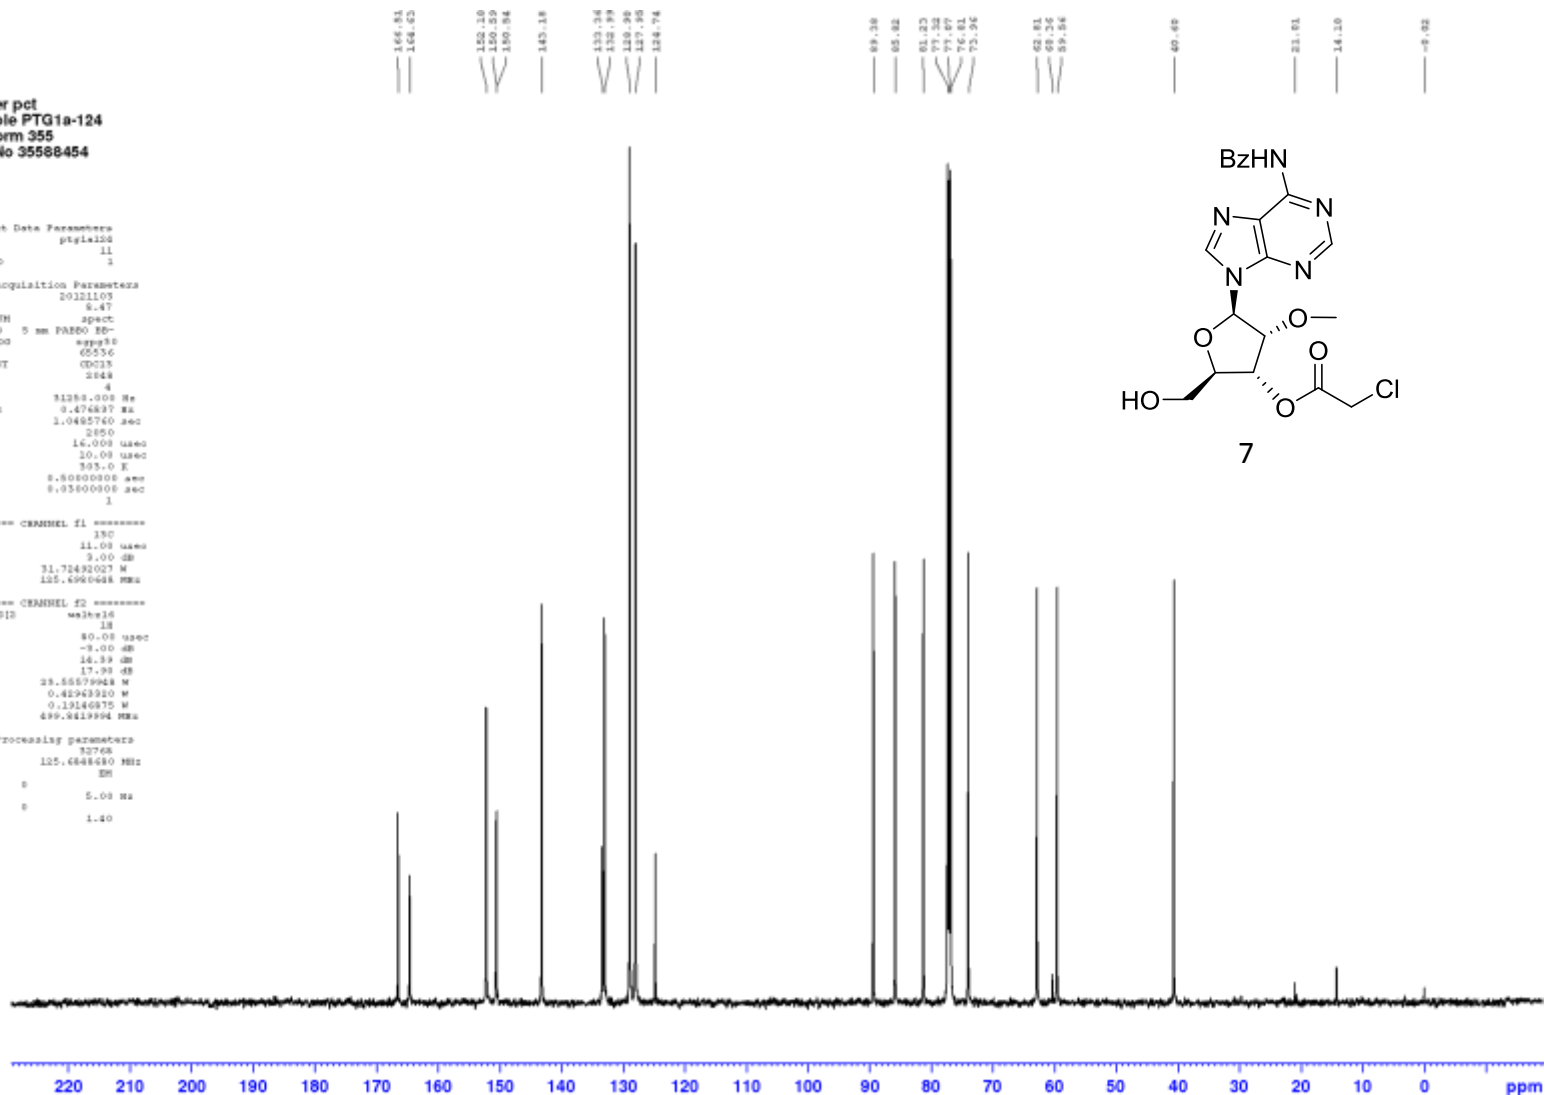

<sup>1</sup>H NMR  
500 MHz

Owner pct  
Sample PTG1a-146  
Platform 355  
Job No 35588454

Current Data Parameters  
NAME ptg1a146  
EXPNO 18  
PROCNO 1

F2 - Acquisition Parameters  
Date\_ 20130903  
Time 19.12  
INSTRUM spect  
PROBHD 5 mm PABBO BB-  
PULPROG zg30  
TD 45524  
SOLVENT CDCl3  
NS 32  
DS 2  
SWH 10330.578 Hz  
FIDRES 0.1576032 Hz  
AQ 3.1719425 sec  
RG 56.8  
EM 49.400 usec  
DE 6.58 usec  
TE 303.0 K  
D1 1.08000080 sec  
TD0 1

\*\*\*\*\* CHANNEL f1 \*\*\*\*\*  
NUC1 1H  
P1 11.20 usec  
PL1 1.80 dB  
PS1W 18.35642283 N  
SF01 500.8530080 MHz

F2 - Processing parameters  
SI 32768  
SF 500.0506145 MHz  
WDW EM  
SSB 0  
LB 0.30 Hz  
GB 0  
PC 1.80

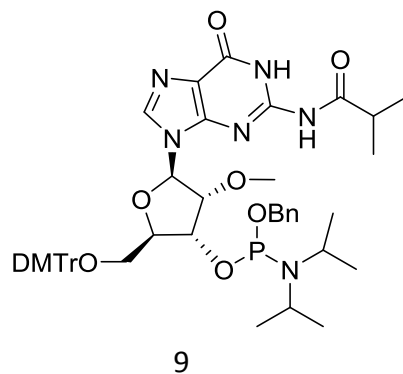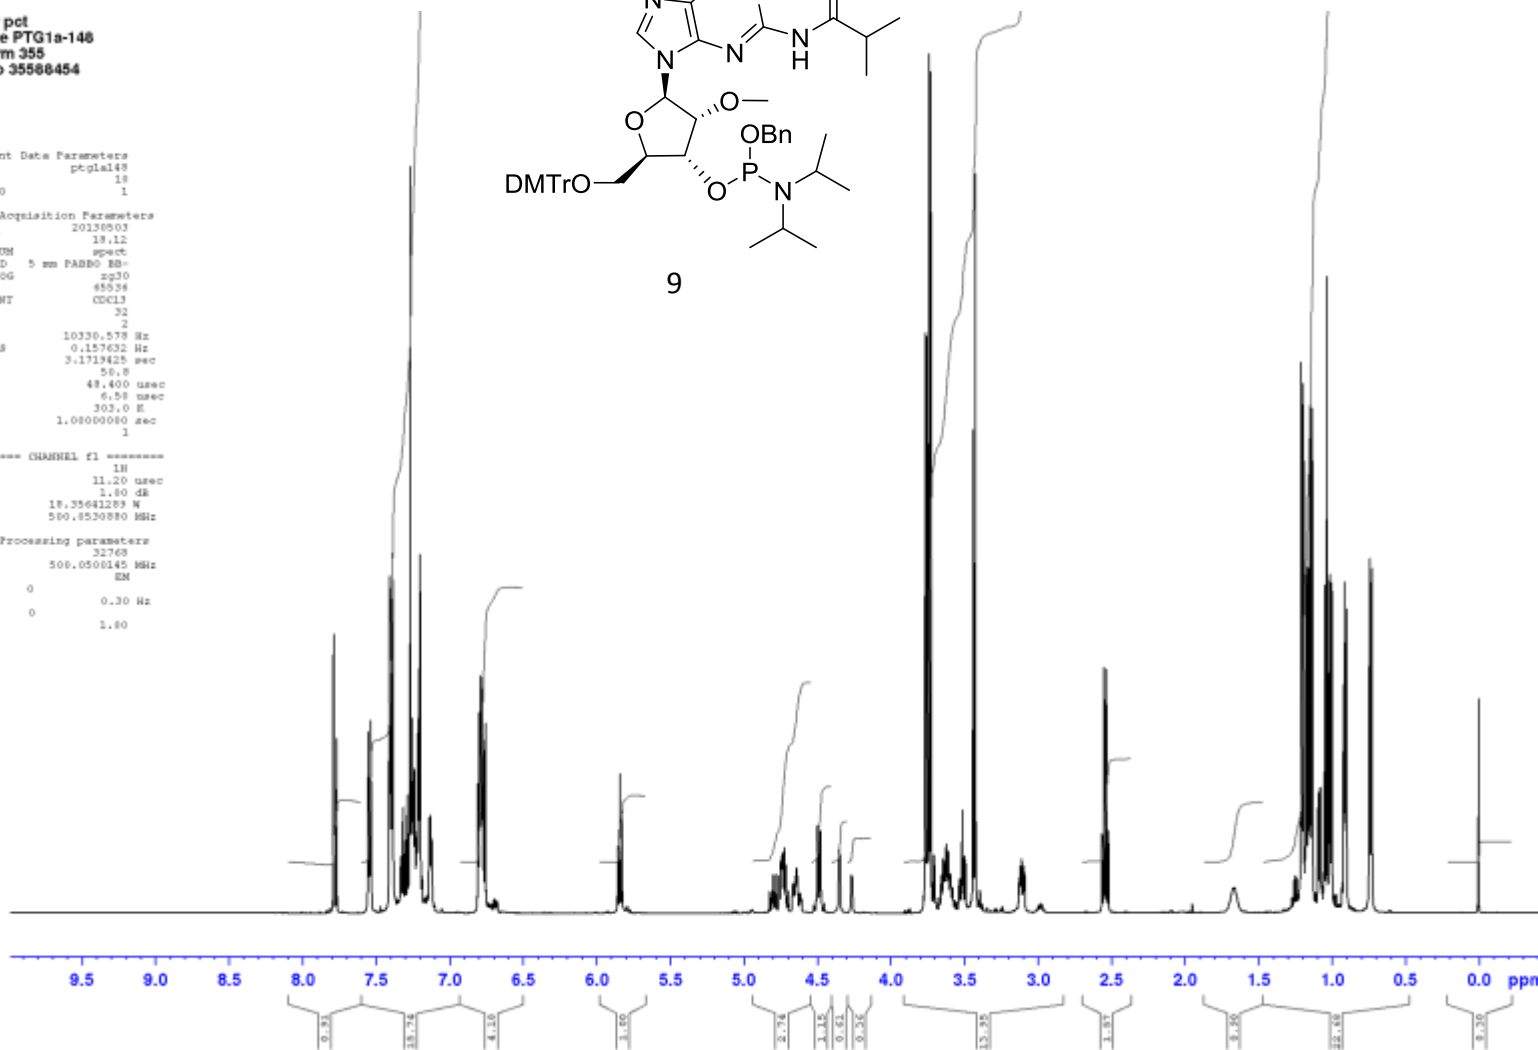

$^{13}\text{C}$  NMR  
126 MHz

Owner pct  
Sample PTG1a-148  
Platform 355  
Job No 35588454

```
Current Data Parameters
NAME      ptg1a148
EXPNO     11
PROCNO    1

F2 - Acquisition Parameters
Date_     20130503
Time      18:29
INSTRUM   spect
PROBHD    5 mm PABBO DD-
PULPROG   zgpg30
TD        65536
SOLVENT   CDCl3
NS        4880
DS        4
SWH        31250.000 Hz
FIDRES    0.474897 Hz
AQ        1.0485760 sec
RG        2050
DW        16.000 usec
DE        15.08 usec
TE        303.0 K
D1        0.58000800 sec
D11       0.09000800 sec
TD0       1

===== CHANNEL f1 =====
NUC1      13C
P1        9.00 usec
PL1       -1.00 dB
PL1W      125.9422882 W
SFO1      125.7508755 MHz

===== CHANNEL f2 =====
PCPDPRG2  waltz16
NUC2      1H
PCPD2     80.00 usec
PL2       1.00 dB
PL12      18.98 dB
PL13      21.10 dB
PL1W      18.85641289 W
PL12W     0.88967369 W
PL13W     0.17938569 W
SFO2      500.0520002 MHz

F2 - Processing parameters
SI        32768
SF        125.7376730 MHz
WDW       EM
SSB       0
LB        3.00 Hz
GB        0
FC        1.48
```

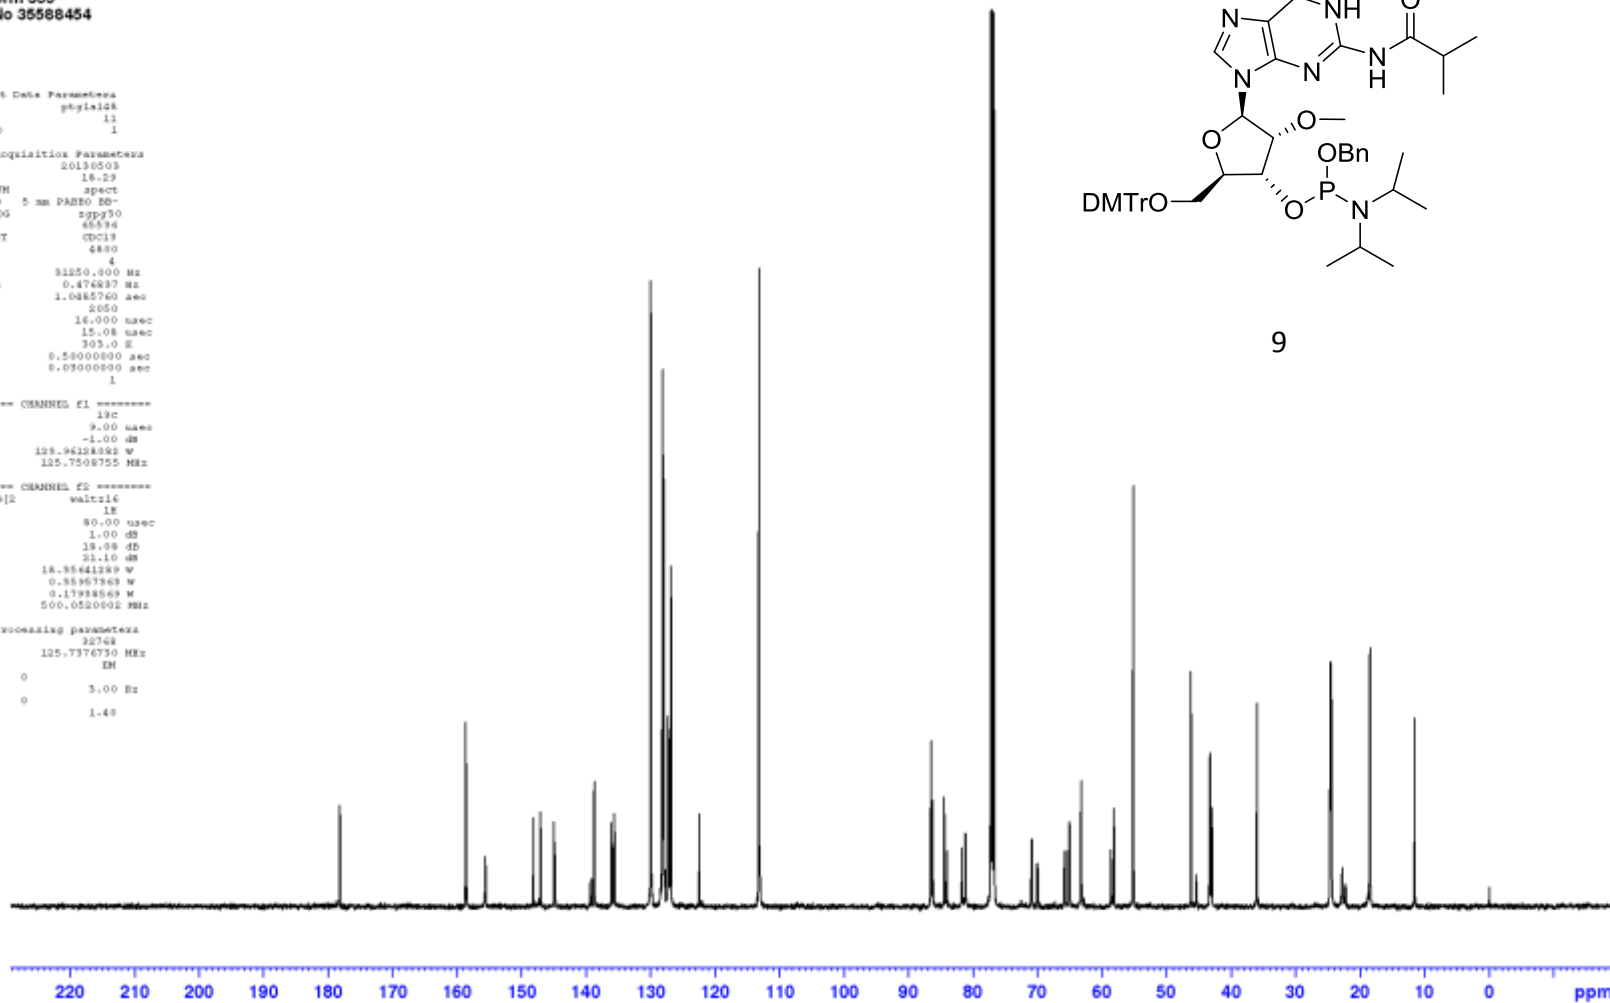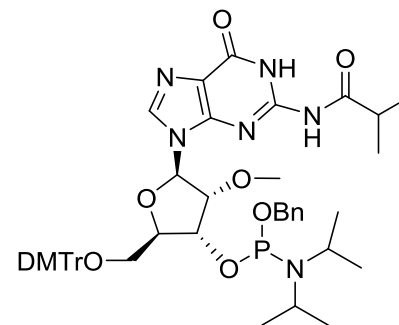

9

**<sup>31</sup>P NMR  
202 MHz**

Owner pct  
Sample PTG1a-148  
Platform 355  
Job No 35588454

```
Current Data Parameters
NAME      ptg1a148
EXPNO     14
PROCNO    1

F2 - Acquisition Parameters
Date_     20130503
Time      21:41
DATEIN    spect
PROBHD    5 mm PAREO EO-
PULPROG   zgpg30
TD         131072
SOLVENT   CDCl3
NS         32
DS         4
SWH        81521.742 Hz
FIDRES     0.423943 Hz
AQ         0.2019083 sec
RG         2050
DM         6.133 usec
DE         6.58 usec
TE         303.0 K
D1         2.0000000 sec
D11        0.0300000 sec
TD0        1

===== CHANNEL f1 =====
NUC1       31P
P1         10.40 usec
PL1        -1.00 dB
PL1M       95.50078549 M
SFO1       202.4360354 MHz

===== CHANNEL f2 =====
CPDPRG2    waltz16
NUC2       1H
PCPD2      80.00 usec
PL2         1.00 dB
PL12       18.98 dB
PL13       21.10 dB
PL1M       18.35641389 W
PL12M      0.35967369 W
PL13M      0.17988669 W
SFO2       500.0520002 MHz

F2 - Processing parameters
SI         45536
SF         202.4235000 MHz
NUC1       31P
ASD        0
LB          3.00 Hz
GB          0
PC         1.40
```

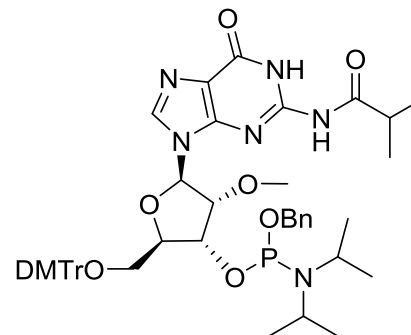

9

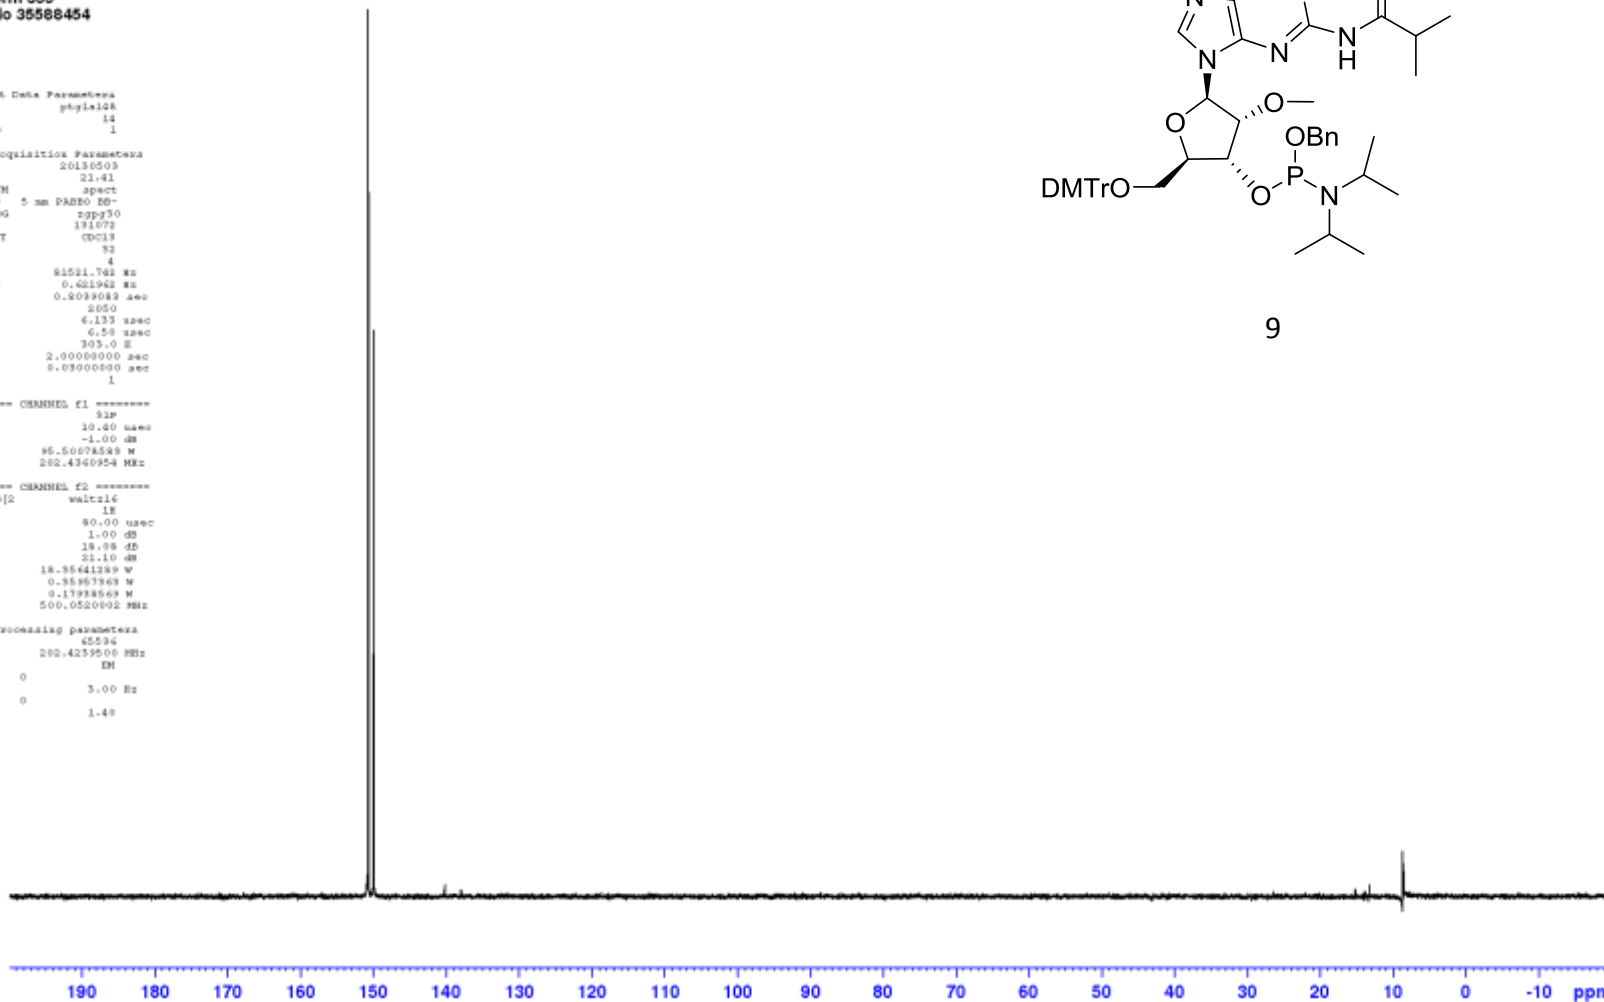



<sup>13</sup>C NMR  
126 MHz

Owner pct  
Sample PTG1a-129  
Platform 355  
Job No 35588454

```
Current Data Parameters
NAME      ptg1a129
EXPNO     11
PROCNO    1

F2 - Acquisition Parameters
Date_     20130207
Time      18:27
INSTRUM   spect
PROBHD    5 mm PABBO DD-
PULPROG   zgpg30
TD         65536
SOLVENT   CDCl3
NS         2048
DS         4
SWH        31250.000 Hz
FIDRES     0.474897 Hz
AQ         1.0485760 sec
RG         2050
DW         16.000 usec
DE         10.00 usec
TE         303.0 K
D1         0.58000000 sec
D11        0.09000000 sec
TD0        1

===== CHANNEL f1 =====
NUC1       13C
P1         11.00 usec
PL1        3.80 dB
PL12W      31.72492027 W
SFO1       125.6980448 MHz

===== CHANNEL f2 =====
PCPDPR2    waltz16
NUC2       1H
PCPD2      80.00 usec
PL2        -3.80 dB
PL12       14.50 dB
PL13       17.40 dB
PL12W      28.55579924 W
PL13W      0.43949320 W
PL13W      0.19146875 W
SFO2       499.8419594 MHz

F2 - Processing parameters
SI         32768
SF         125.6980448 MHz
WDW        EM
SSB        0
LB         5.00 Hz
GB         0
FC         1.48
```

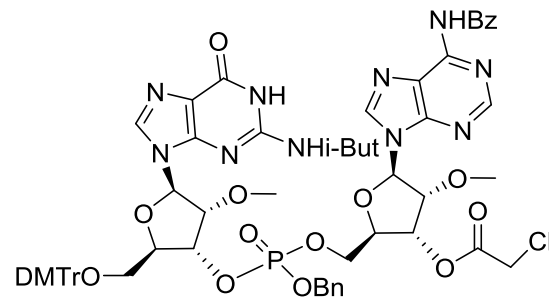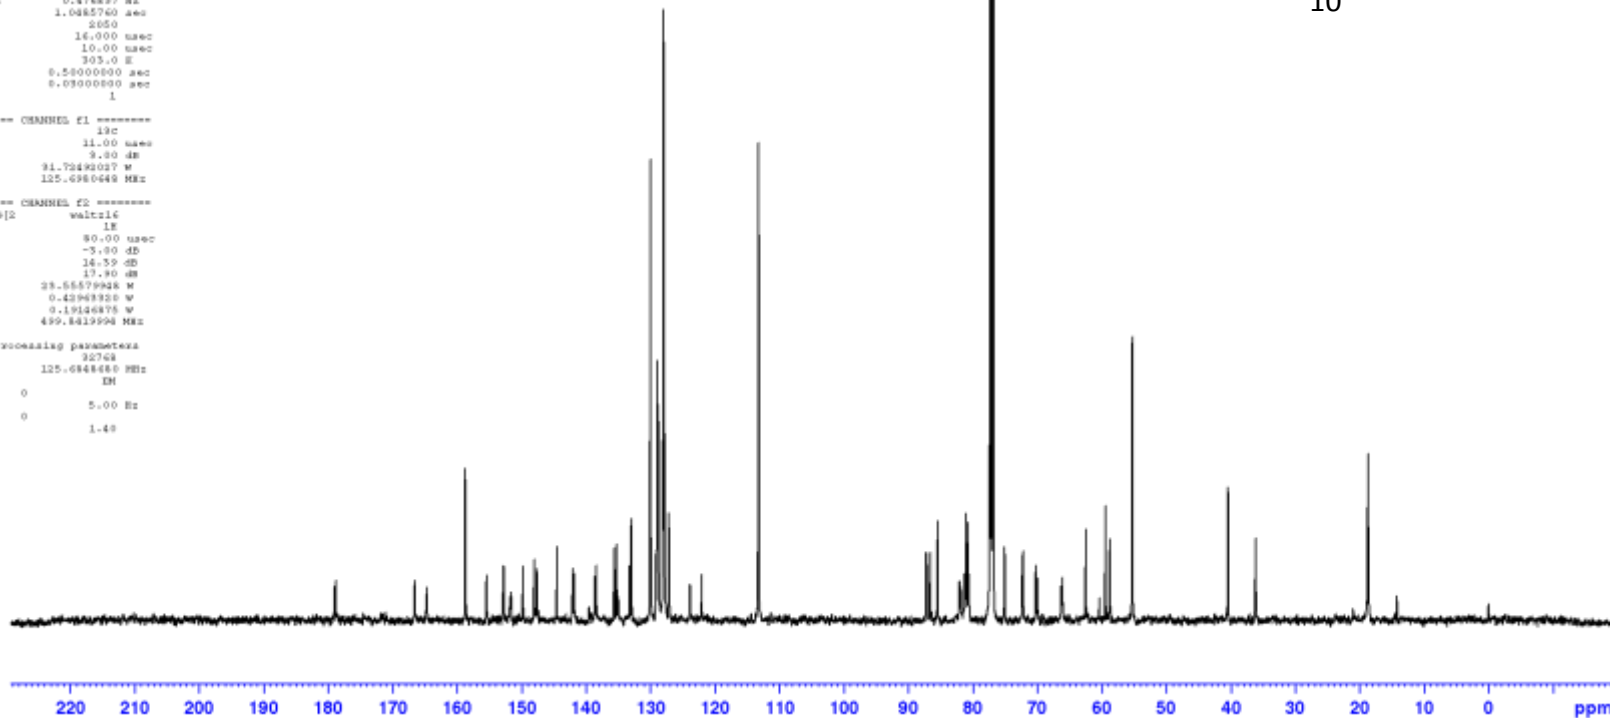



**<sup>1</sup>H NMR  
500 MHz**

Owner pct  
Sample PTG1a-130A  
Platform 355  
Job No 35588454

Current Data Parameters  
NAME ptg1a130a  
KEPNO 18  
PROCNO 1

F2 - Acquisition Parameters  
Date\_ 20130207  
Time 19.32  
INSTRUM spect  
PROBHD 5 mm PARRO 8H-  
PULPROG zg30  
TD 65524  
SOLVENT cdcl3  
NS 32  
DS 2  
SWH 10302.198 Hz  
FIDRES 0.157199 Hz  
AQ 3.1808895 sec  
RG 114  
DW 49.533 usec  
DE 19.08 usec  
TE 303.0 K  
DL 1.0000000 sec  
TDO 1

----- CHANNEL f1 -----  
NUC1 1H  
P1 10.00 usec  
PL1 -3.00 dB  
PL1W 23.55573988 MHz  
SFO1 499.9430867 MHz

F2 - Processing parameters  
SI 22749  
SF 499.9400941 MHz  
WDW EM  
SSB 0  
LB 0 0.30 Hz  
GB 0  
PC 1.00

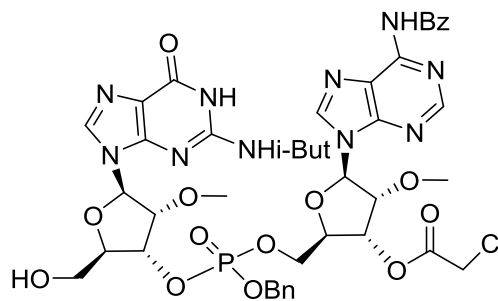

11A

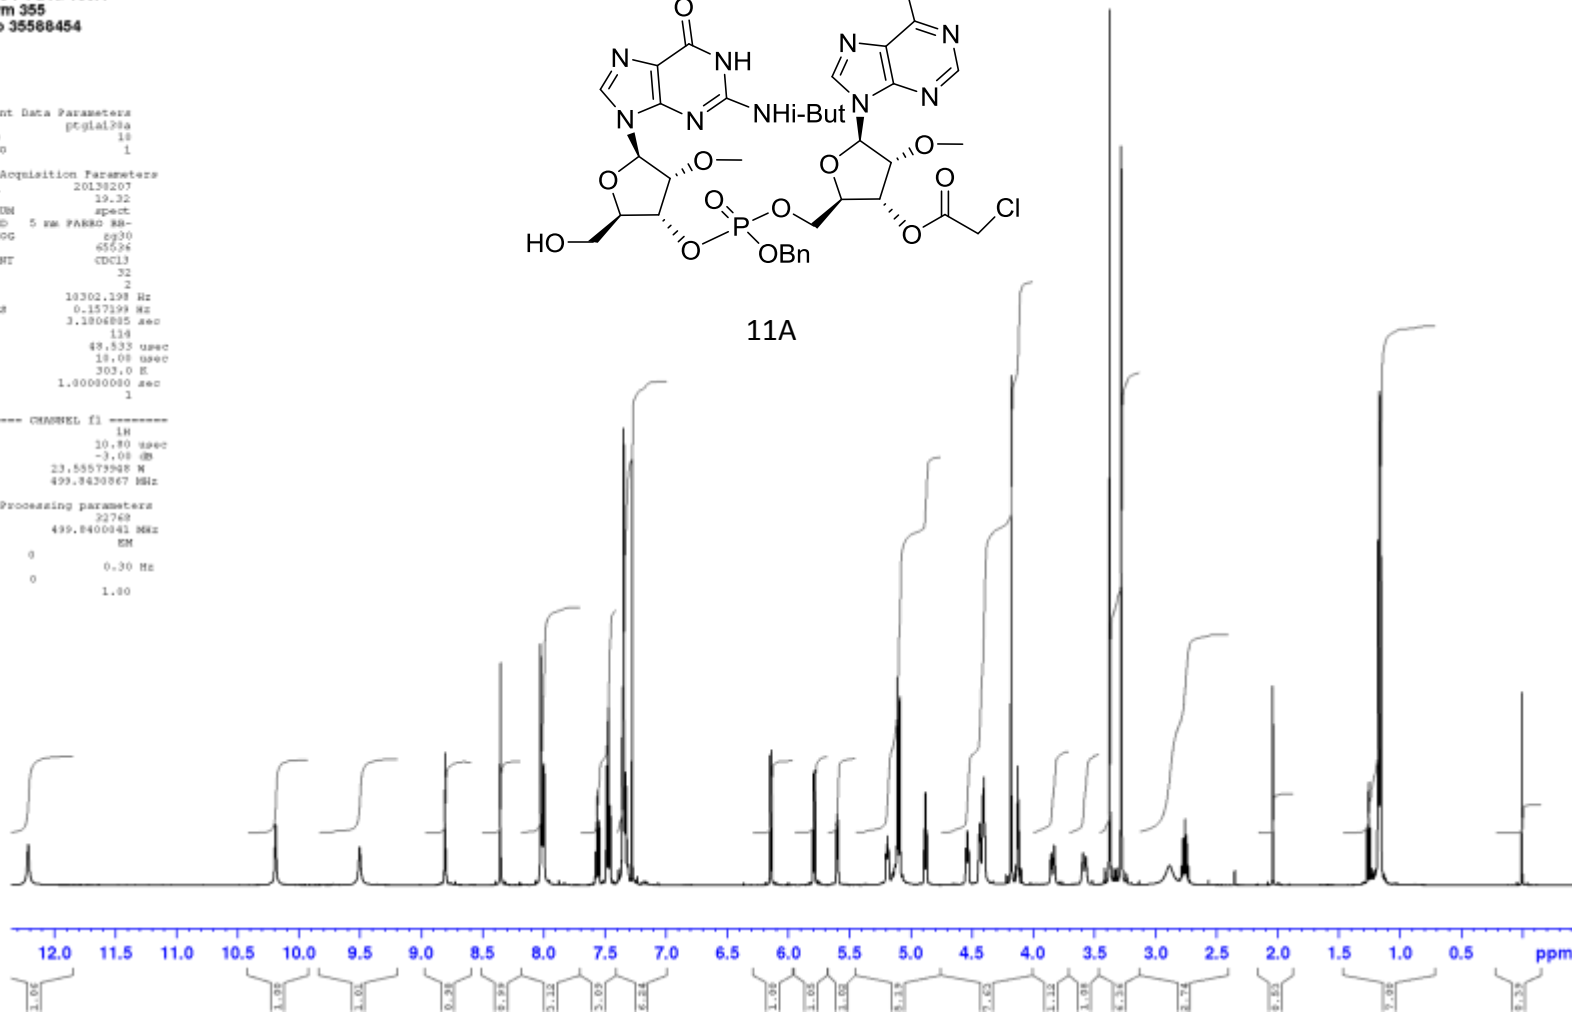

**<sup>13</sup>C NMR  
126 MHz**

Owner pct  
Sample PTG1a-130A  
Platform 355  
Job No 35588454

Current Data Parameters  
NAME p31a130a  
EXPNO 11  
PROCNO 1

F2 - Acquisition Parameters  
Date\_ 20130207  
Time 20:50  
INSTRUM spect  
PROBHD 5 mm PABBO DD-  
PULPROG zgpg30  
TD 65536  
SOLVENT CDCl3  
NS 2048  
DS 4  
SWH 31250.300 Hz  
FIDRES 0.474897 Hz  
AQ 1.0485760 sec  
RG 2650  
DW 16.000 usec  
DE 10.00 usec  
TE 303.0 K  
D1 0.58000000 sec  
D11 0.03000000 sec  
TD0 1

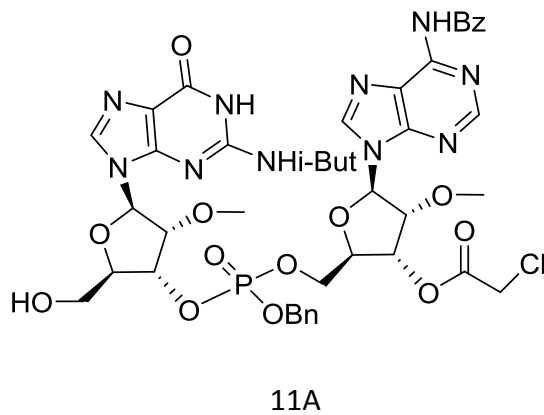

===== CHANNEL f1 =====  
NUC1 13C  
P1 11.00 usec  
PL1 3.80 dB  
PL1W 31.72492027 W  
SFO1 125.6980448 MHz

===== CHANNEL f2 =====  
PCPD2[2] waltz16  
NUC2 1H  
PCPD2 80.00 usec  
PL2 -3.80 dB  
PL12 14.50 dB  
PL13 17.40 dB  
PL1W 28.56579924 W  
PL12W 0.43949320 W  
PL13W 0.19146875 W  
SFO2 499.8419594 MHz

F2 - Processing parameters  
SI 32768  
SF 125.6980448 MHz  
WDW EM  
SSB 0  
LB 5.00 Hz  
GB 0  
FC 1.48

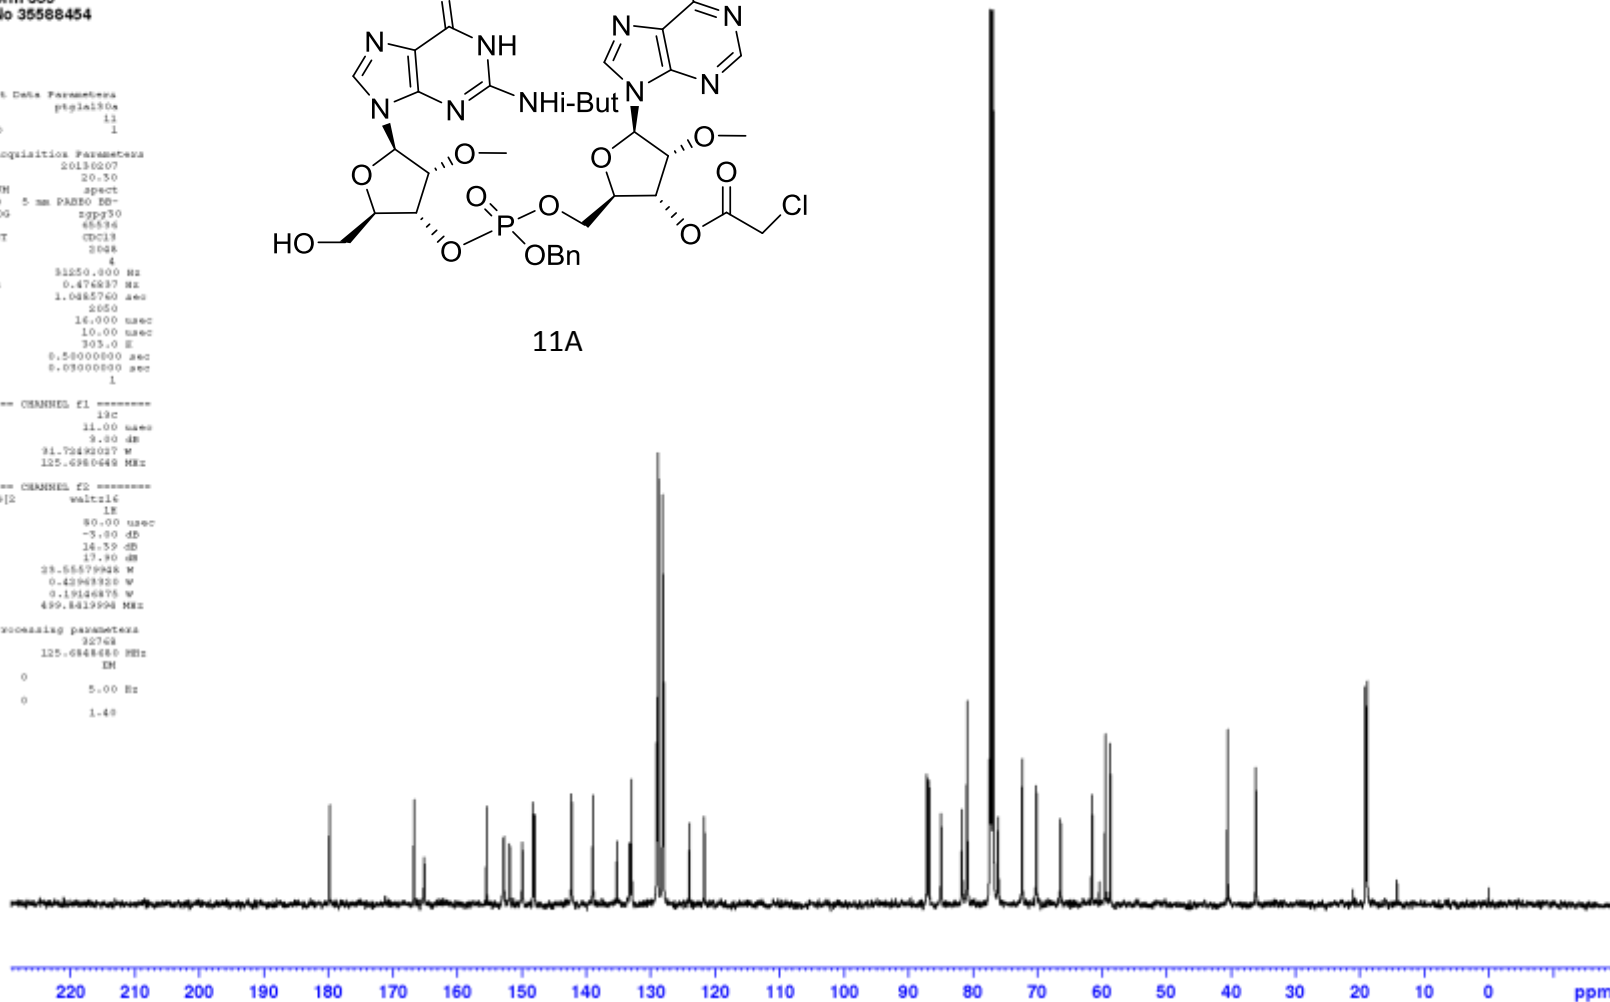

**<sup>31</sup>P NMR  
202 MHz**

Owner pct  
Sample PTG1a-130A  
Platform 355  
Job No 35588454

```
Current Data Parameters
NAME      ptg1a130a
EXPNO     14
PROCNO    1

F2 - Acquisition Parameters
Date_     20130207
Time      21.34
INSTRUM   spect
PROBHD    5 mm PABBO DD-
PULPROG   zgpg30
TD         131072
SOLVENT   CDCl3
NS         82
DS         4
SWH        61521.741 Hz
FIDRES     0.401941 Hz
AQ         0.8039043 sec
RG         2050
DW         6.133 usec
DE         10.00 usec
TE         303.1 K
D1         2.00000000 sec
D11        0.09000000 sec
TD0        1

===== CHANNEL f1 =====
NUC1       31P
P1         10.40 usec
PL1        2.00 dB
PL12W      48.1898458 W
SFO1       202.3510864 MHz

===== CHANNEL f2 =====
PCPDPR2    waltz16
NUC2       1H
PCPD2      80.00 usec
PL2        -3.80 dB
PL12       14.50 dB
PL13       17.40 dB
PL12W      38.6679924 W
PL13W      0.43949320 W
PL13W      0.19146875 W
SFO2       499.8419594 MHz

F2 - Processing parameters
SI         65536
SF         202.3589410 MHz
WDW        EM
SSB         0
LB          5.00 Hz
GB          0
PC          1.48
```

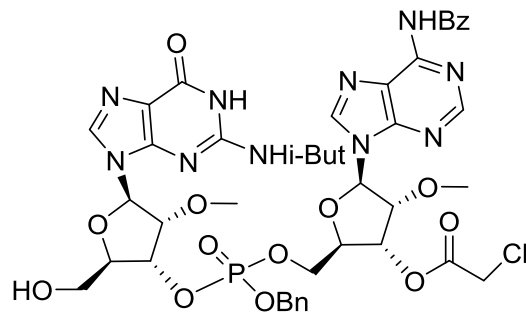

11A

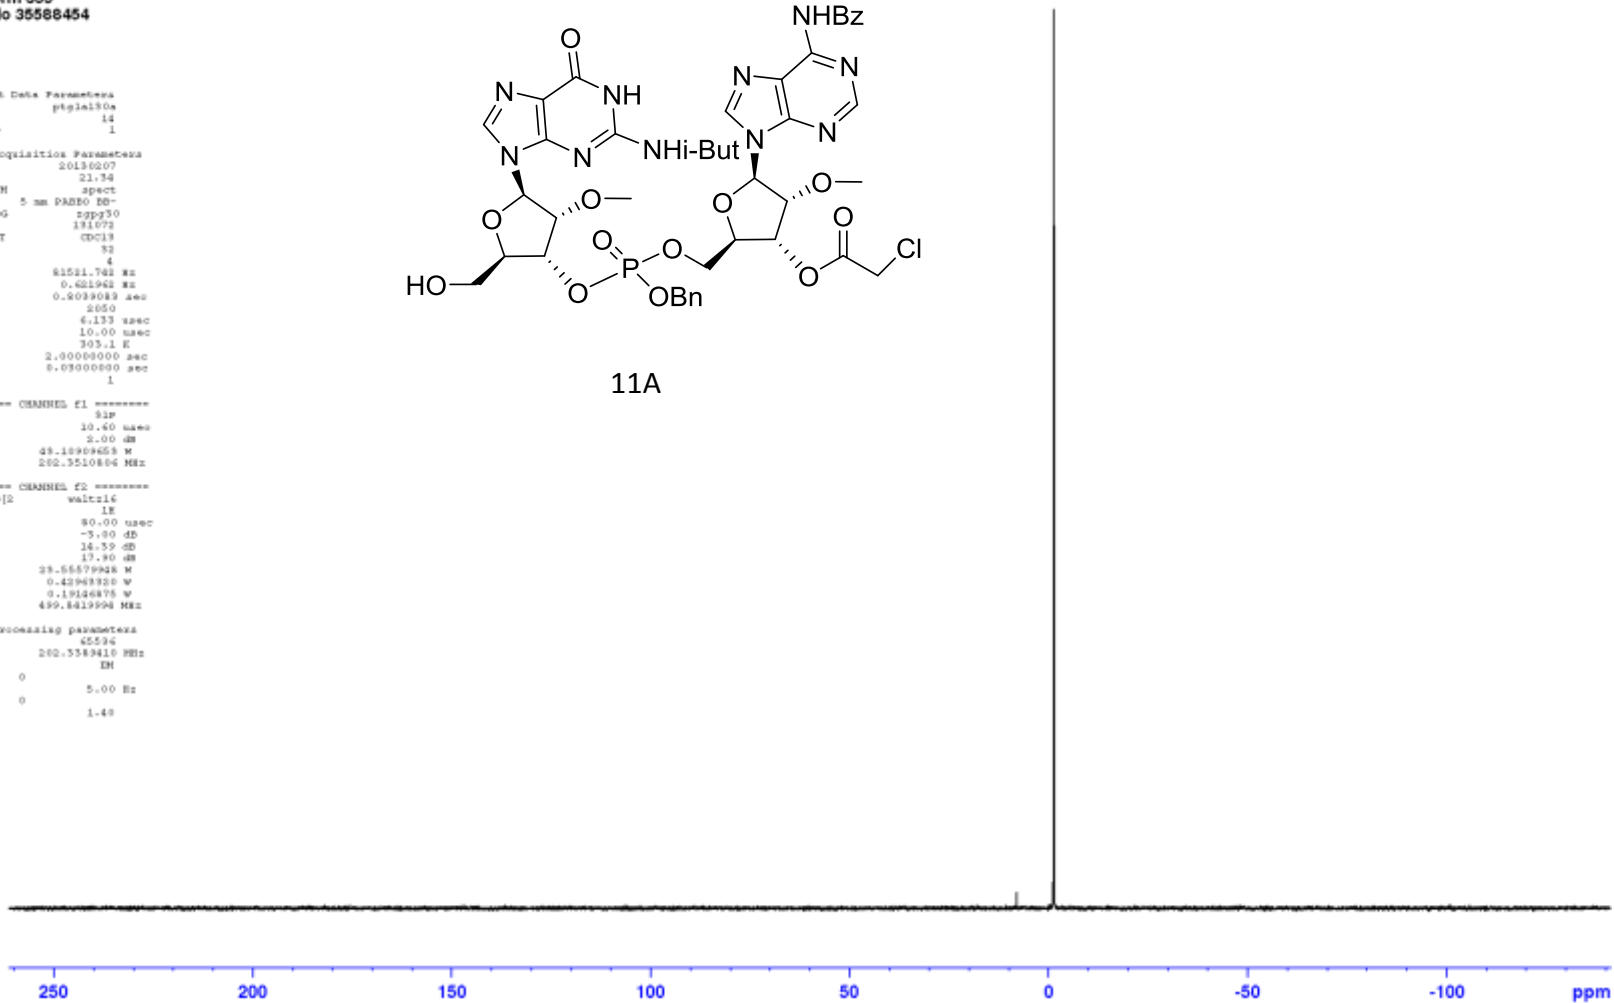



**<sup>13</sup>C NMR  
126 MHz**

Owner pct  
Sample PTG1a-130B  
Platform 355  
Job No 35588454

```
Current Data Parameters
NAME      ptg1a130b
EXPNO     11
PROCNO    1

F2 - Acquisition Parameters
Date_     20130207
Time      22.37
INSTRUM   spect
PROBHD    5 mm PABBO DD-
PULPROG   zgpg30
TD         65536
SOLVENT   CDCl3
NS         2048
DS         4
SWH        31250.000 Hz
FIDRES     0.474897 Hz
AQ          1.0485760 sec
RG          2650
DW          16.000 usec
DE          10.00 usec
TE          303.0 K
D1          0.58000000 sec
D11         0.03000000 sec
TD0         1

===== CHANNEL f1 =====
NUC1       13C
P1         11.00 usec
PL1        3.80 dB
PL12W      31.72492027 W
SFO1       125.6980448 MHz

===== CHANNEL f2 =====
CPCPRG2    waltz16
NUC2       1H
PCPD2      80.00 usec
PL2        -3.80 dB
PL12       14.50 dB
PL13       17.40 dB
PL12W      28.56579924 W
PL13W      0.43949320 W
PL13W      0.19146875 W
SFO2       499.8419594 MHz

F2 - Processing parameters
SI         32768
SF         125.6980448 MHz
WDW        EM
SSB        0
LB          5.00 Hz
GB          0
FC          1.48
```

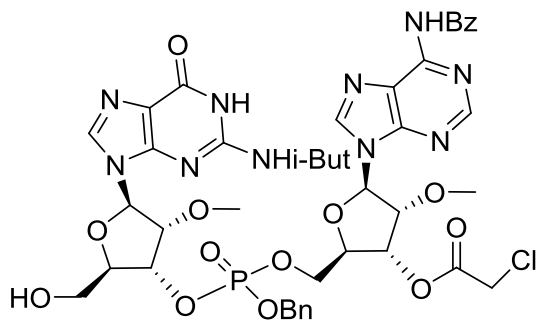

11B

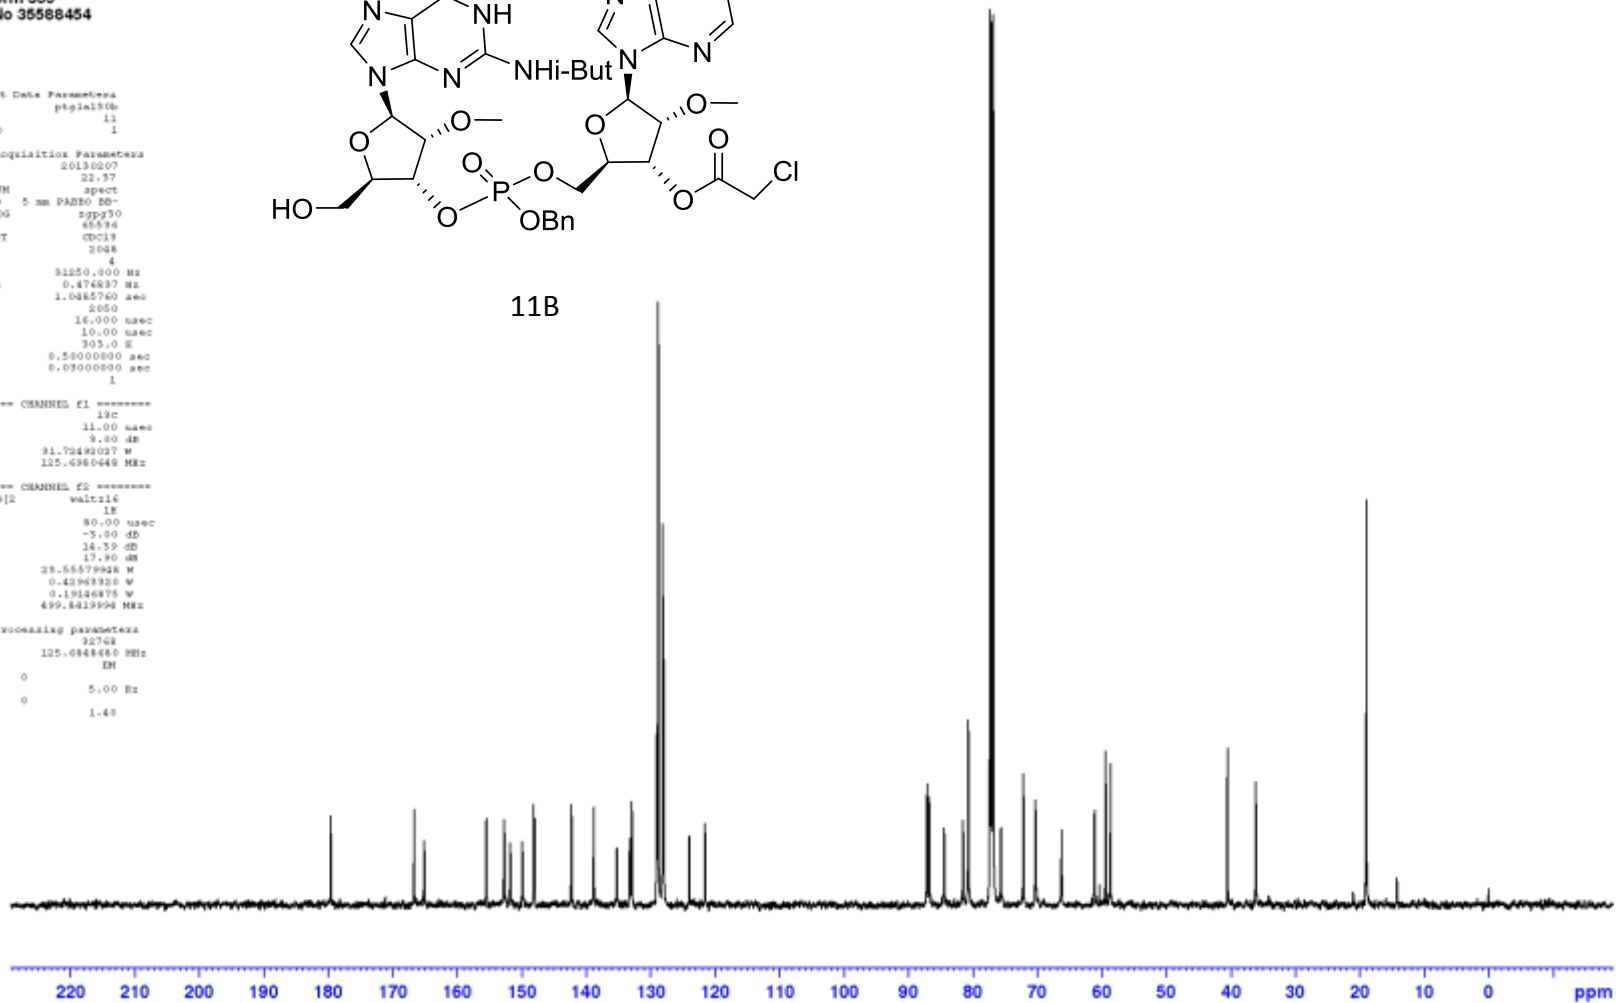

**<sup>31</sup>P NMR  
202 MHz**

Owner pct  
Sample PTG1a-130B  
Platform 355  
Job No 35588454

```
Current Data Parameters
NAME      pglai30b
EXPNO     14
PROCNO    1

F2 - Acquisition Parameters
Date_     20130207
Time      23:41
INSTRUM   spect
PROBHD    5 mm PABBO DD-
PULPROG   zgpg30
TD         131072
SOLVENT   CDCl3
NS         82
DS         4
SWH        81521.741 Hz
FIDRES     0.401943 Hz
AQ          0.4039083 sec
RG          2050
DW          6.133 usec
DE          10.00 usec
TE          303.0 K
D1          2.0000000 sec
D11         0.0300000 sec
TD0         1

===== CHANNEL f1 =====
NUC1       31P
P1         10.40 usec
PL1        2.00 dB
PL12W      48.1898458 W
SFO1       202.3510864 MHz

===== CHANNEL f2 =====
PCPDPR2    waltz16
NUC2       1H
PCPD2      80.00 usec
PL2        -3.80 dB
PL12       14.50 dB
PL13       17.40 dB
PL12W      28.6679924 W
PL13W      0.43949320 W
PL13W      0.19146875 W
SFO2       499.8419594 MHz

F2 - Processing parameters
SI         65536
SF         202.3589410 MHz
WDW        EM
SSB        0
LB          5.00 Hz
GB          0
FC          1.48
```

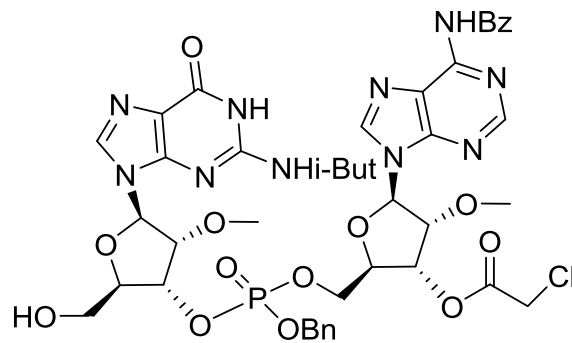

11B

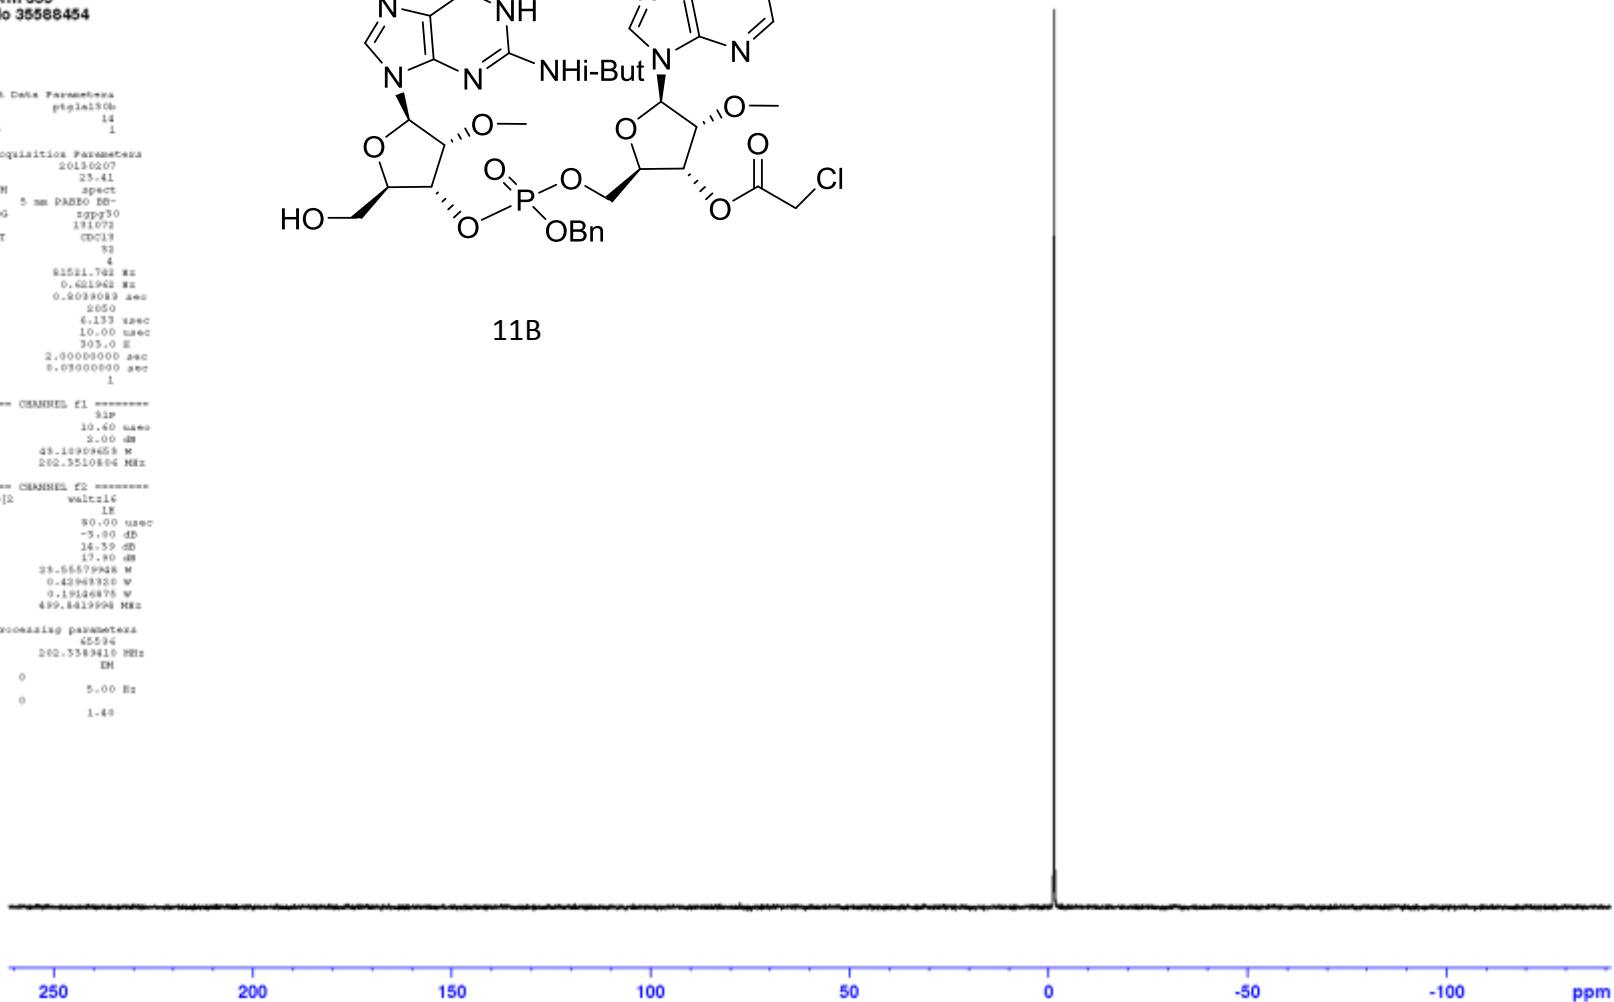



**<sup>13</sup>C NMR  
126 MHz**

Owner gbe  
Sample GBE12-056B  
Platform 355  
Job No 35588454

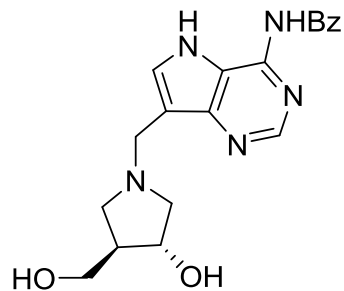

12

```
Current Data Parameters
NAME      g8-120515
EXPNO     11
PROCNO    1

F2 - Acquisition Parameters
Date_     20120515
Time      18.42
INSTRUM   spect
PROBHD    5 mm PABBO DD-
PULPROG   zgpg30
TD         65536
SOLVENT   MeOD
NS         2400
DS         4
SWH        31250.000 Hz
FIDRES     0.474897 Hz
AQ         1.0485760 sec
RG         2050
DW         16.000 usec
DE         15.08 usec
TE         303.0 K
D1         0.58000000 sec
D11        0.09000000 sec
TD0        1

===== CHANNEL f1 =====
NUC1       13C
P1         9.00 usec
PL1        -1.00 dB
PL1W       128.9612882 W
SFO1       125.7508755 MHz

===== CHANNEL f2 =====
PCPDPRG2   waltz16
NUC2       1H
PCPD2      80.00 usec
PL2         1.00 dB
PL12        18.98 dB
PL13        21.10 dB
PL1W       18.85641289 W
PL12W      0.88967369 W
PL13W      0.17938569 W
SFO2       500.0520002 MHz

F2 - Processing parameters
SI         32768
SF         125.7379495 MHz
WDW        EM
SSB         0
LB          3.00 Hz
GB          0
FC          1.48
```

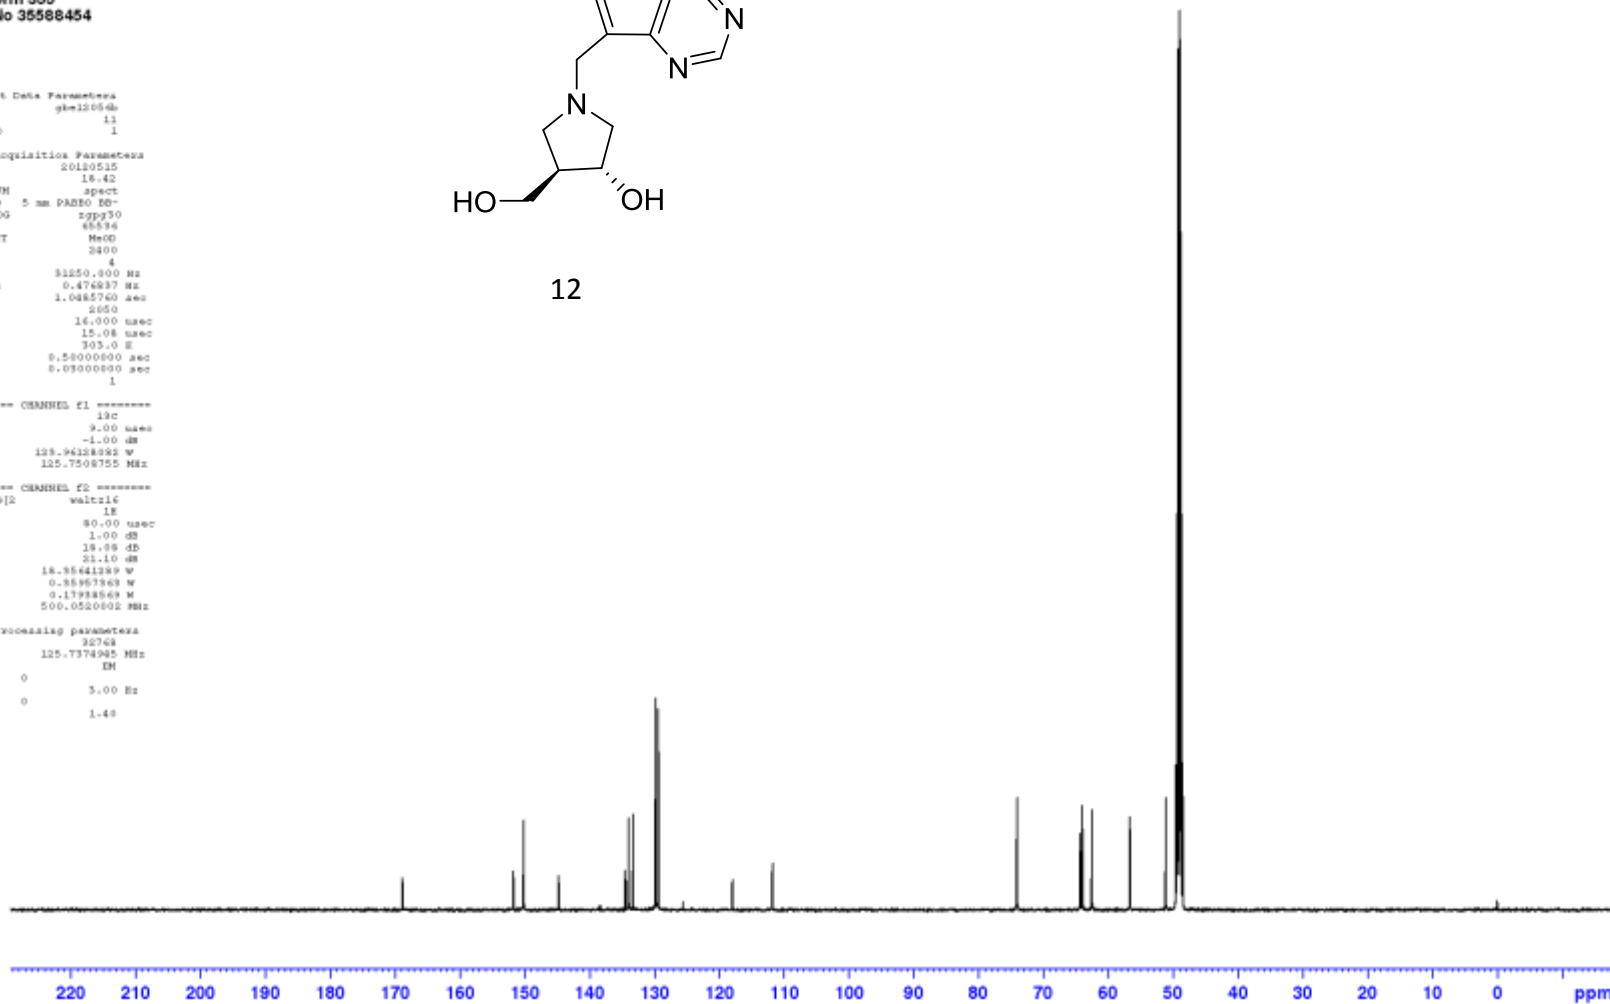



<sup>1</sup>H NMR  
500 MHz

Owner gbe  
Sample 12-057a  
Platform 355  
Job No 35568454

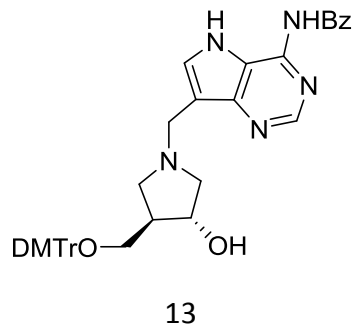

```
Current Data Parameters
NAME      gbe12-057a
EXPNO     10
PROCNO    1

F2 - Acquisition Parameters
Date_     20120517
Time      14.06
INSTRUM   spect
PROBHD    5 mm PABBO BB-
PULPROG   zgpg30
TD        65536
SOLVENT   CDCl3
NS        32
DS        2
SWH        16330.578 Hz
FIDRES    0.157632 Hz
AQ        3.1719425 sec
RG        64
DM        48.400 usec
DE        6.50 musec
TE        303.8 K
D1        1.0000000 sec
TD0       1

***** CHANNEL f1 *****
NUC1      1H
P1        11.20 usec
PL1       1.00 dB
PL1M      18.35641289 M
SFO1      500.0530880 MHz

F2 - Processing parameters
SI        32768
SF        500.0500194 MHz
WDW       EM
SSB       0
SR        0.28 Hz
GB        0
PC        1.00
```

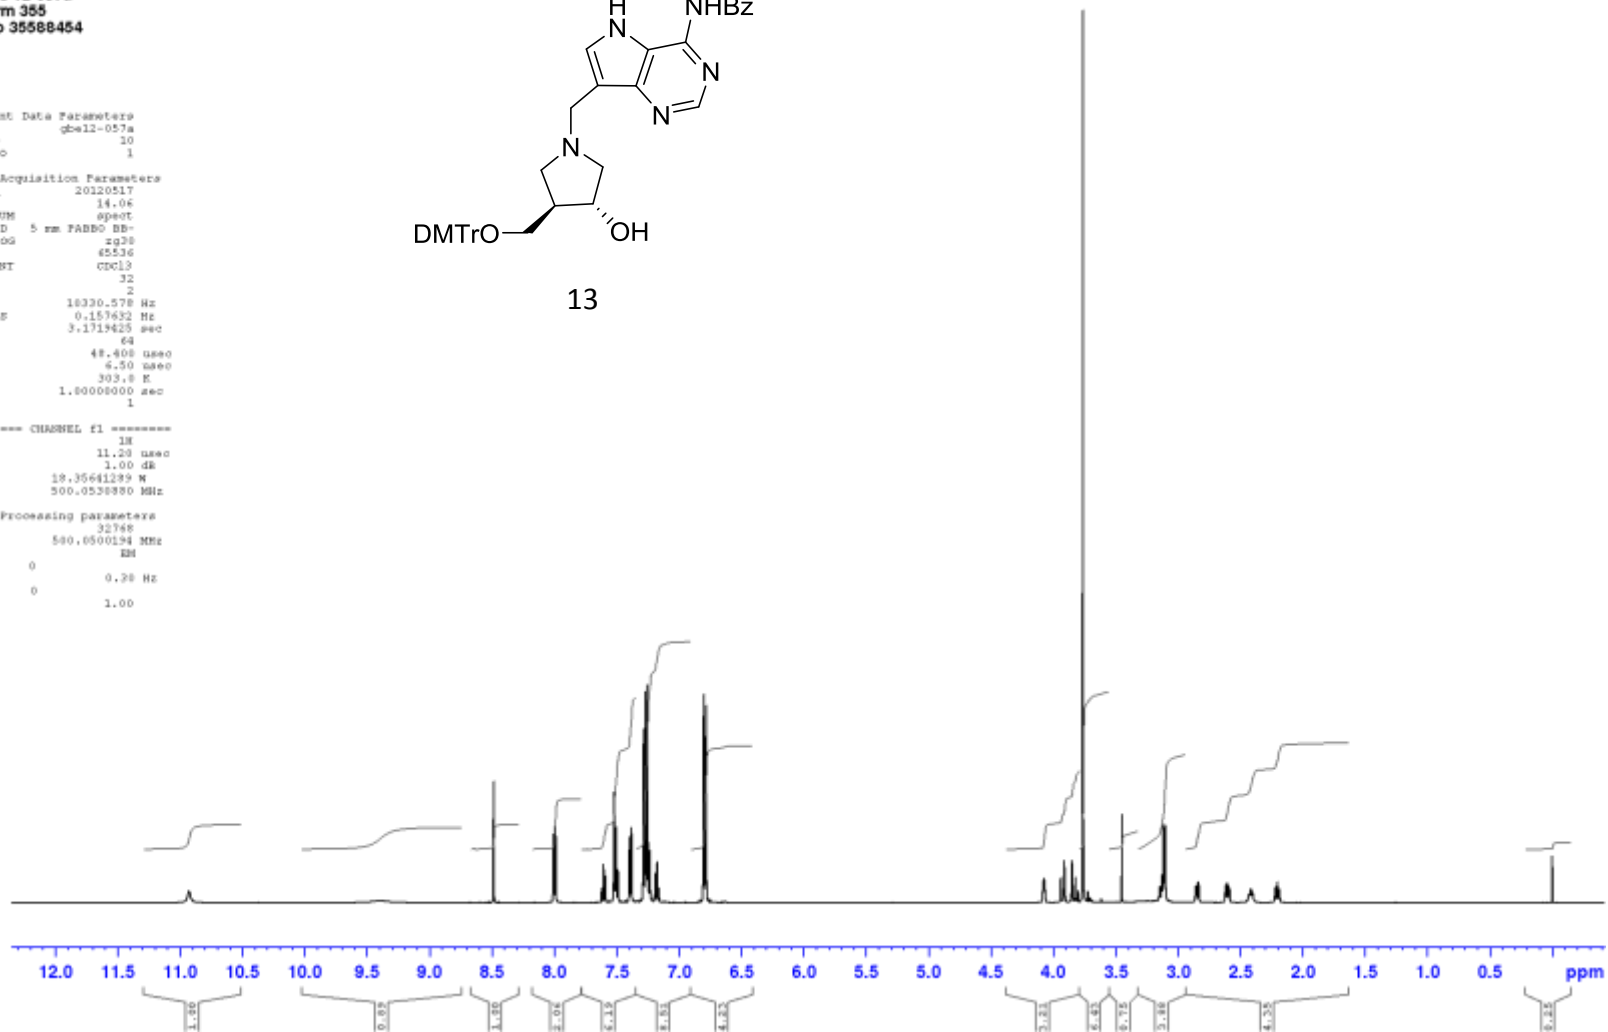

<sup>13</sup>C NMR  
126 MHz

```
Current Data Parameters
NAME      gbel1-007a
EXPNO    21
PROCNO   1

F2 - Acquisition Parameters
Date_    20120517
Time     17:20
INSTRUM  spect
PROBHD   5 mm PABBO BB-
PULPROG  zgpg30
TD       65536
SOLVENT  cpd13
NS       830
DS       4
SFO      1250.000 MHz
FIDRES   0.476837 Hz
AQ       1.0485760 sec
RG       141
DW       16.000 usec
DE       15.08 usec
TE       303.1 K
D3       0.59000000 sec
D11      0.09000000 sec
TEO      1

----- CHANNEL f1 -----
NUC1      13C
P1       9.00 usec
PL1      -1.00 dB
P1LM     123.9412882 W
SFO1     125.7508755 MHz

***** CHANNEL f2 *****
CPDPRG2  waltz16
NUC2      1H
PCPD2    80.00 usec
P12      1.00 dB
P1L2     19.98 dB
P1L3     21.10 dB
P1LM     18.95441289 W
P1L3M    0.35967363 W
P1L3W    0.17983669 W
SFO2     500.0520002 MHz

F2 - Processing parameters
SI       32768
SF       125.7376730 MHz
MCM      EM
ASB      0
LB       3.00 Hz
GB       0
PC       1.49
```

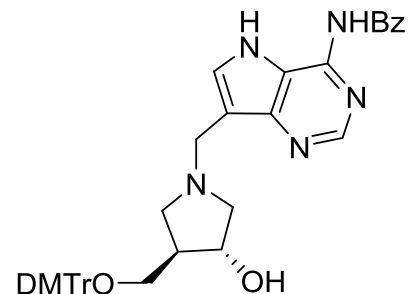

13

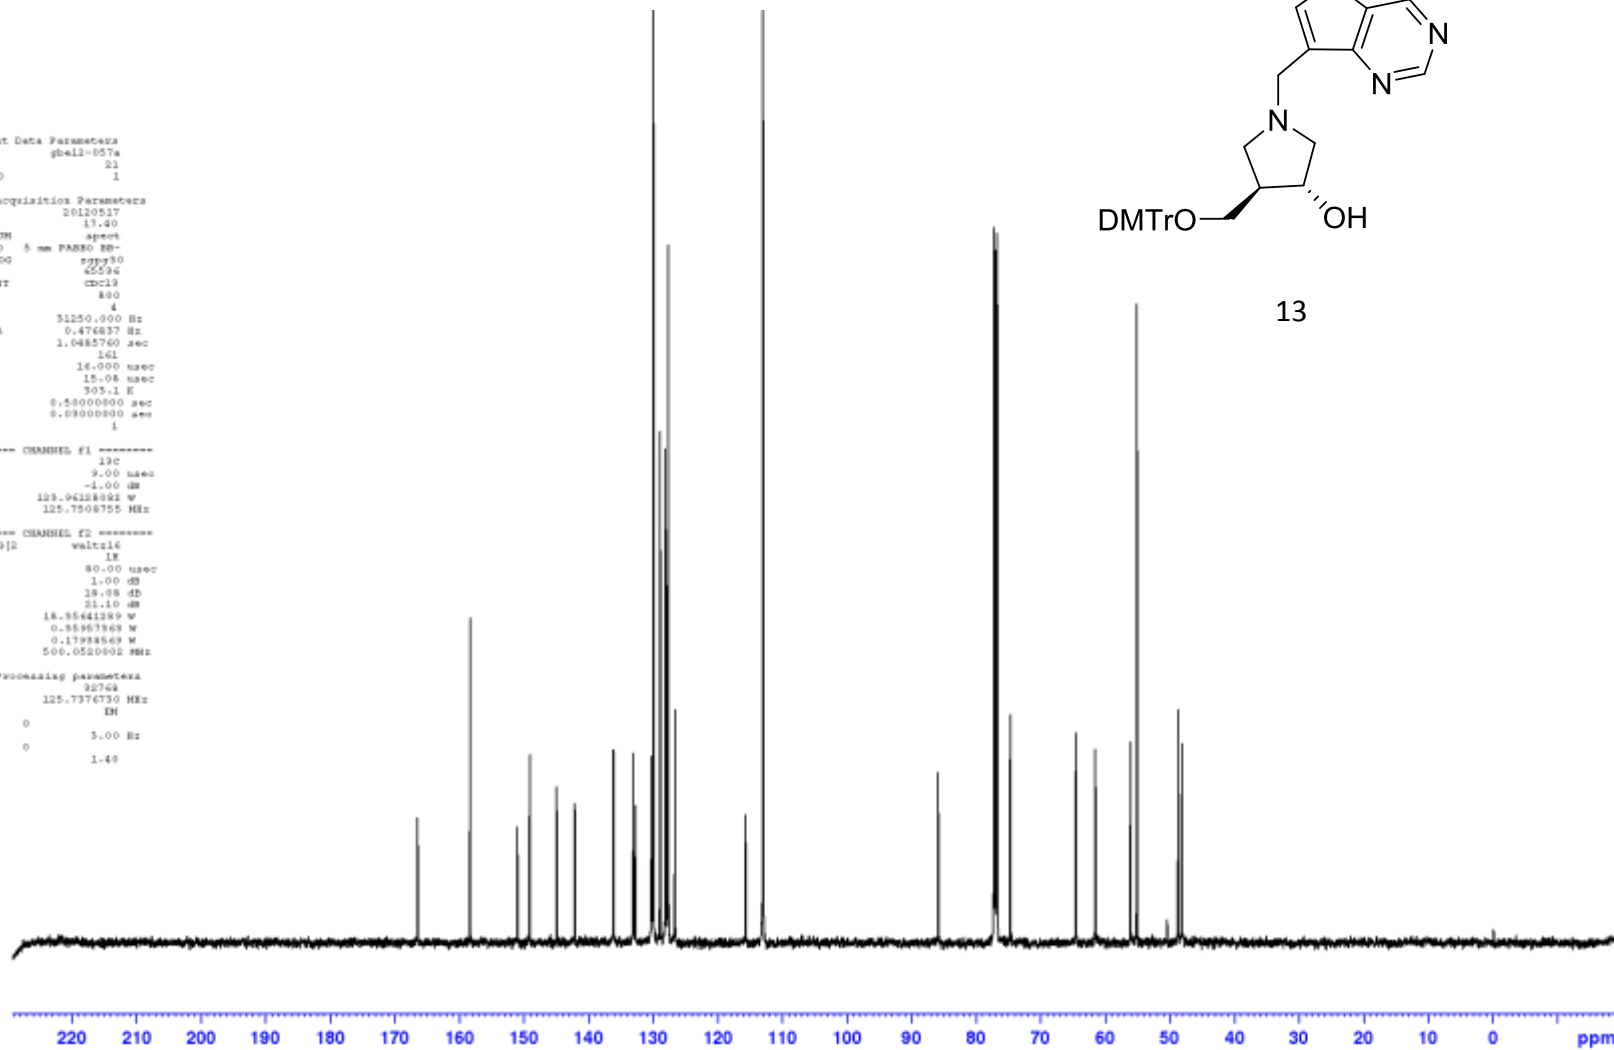

<sup>1</sup>H NMR  
500 MHz

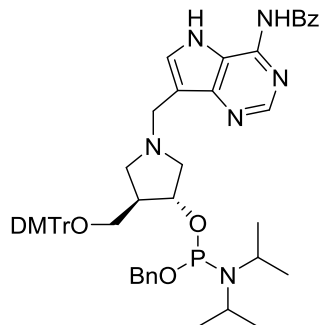

14

```
Current Data Parameters
NAME      ptgl151
EXPNO    10
PROCNO   1

F2 - Acquisition Parameters
Date_    20130511
TIME     0.15
INSTRUM  spect
PROBHD   5 mm PABBO BB-
PULPROG  zgpg30
TD       65536
SOLVENT  CDCl3
NS       32
DS       2
SWH      10302.198 Hz
FIDRES   0.157199 Hz
AQ       3.1804805 sec
RG       80.6
CW       48.533 usec
DE       10.00 usec
TE       303.2 K
DQ       1.0000000 sec
TDO      1
```

```
----- CHANNEL f1 -----
NUC1     1H
P1       18.00 usec
PL1      -3.00 dB
PL1W     23.55579948 M
SFO1     499.9420867 MHz
```

```
F2 - Processing parameters
SI       32768
SF       499.8400163 MHz
NMW      MHz
SSB      0
LA       0.39 Hz
GB       0
PC       1.00
```

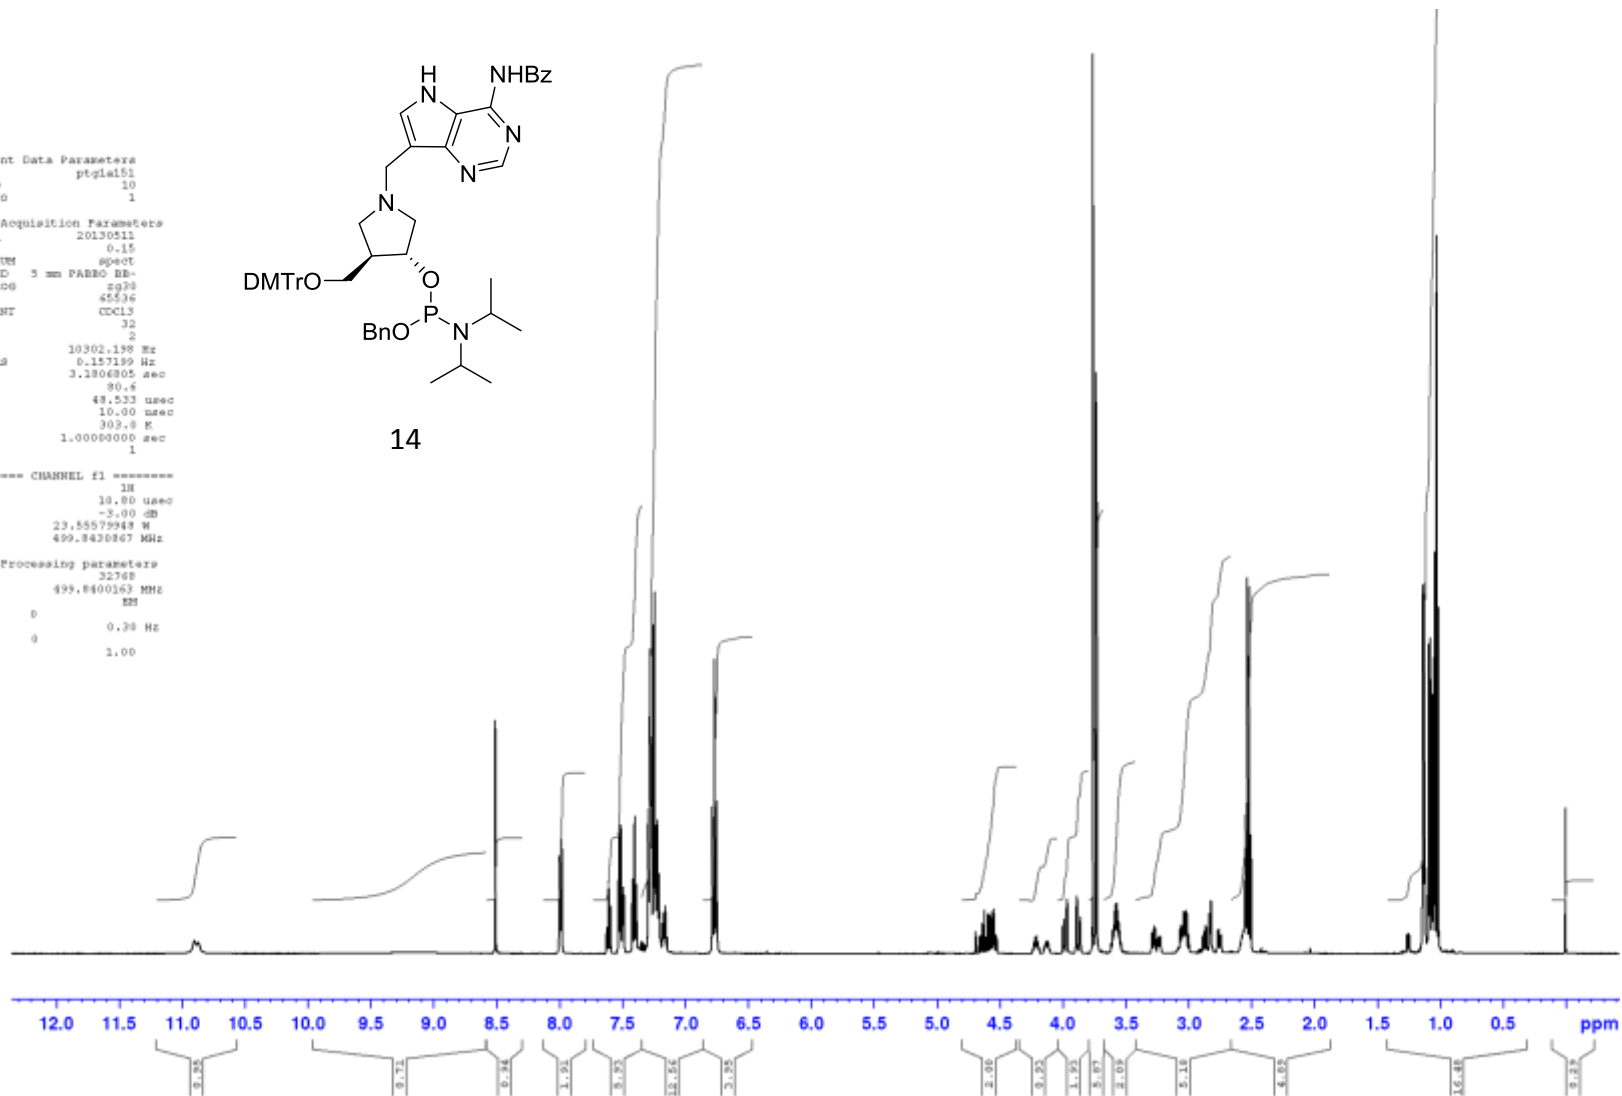

<sup>13</sup>C NMR  
126 MHz

```
Current Data Parameters
NAME      ptgl151
EXPNO    11
PROCNO   1

F2 - Acquisition Parameters
Date_    20130511
Time     1.18
INSTRUM  spect
PROBHD   5 mm PABBO BB-
PULPROG  zgpg30
TD       65536
SOLVENT  cdcl3
NS       2048
DS       4
SFO      31250.000 Hz
FIDRES   0.476837 Hz
AQ       1.0485760 sec
RG       2050
DM       18.000 nsec
DE       10.00 nsec
TE       303.0 K
D3       0.58000000 sec
D11      0.09000000 sec
TEO      1

----- CHANNEL f1 -----
NUC1     13C
P1       11.00 nsec
P11      9.00 dB
P11M     31.7049027 W
SFO1     125.0984648 MHz

***** CHANNEL f2 *****
CPDPRG2  waltz16
NUC2     1H
PCPD2    80.00 nsec
P2       -3.00 dB
P21      14.39 dB
P21M     29.65579948 W
P21M     0.43969320 W
P21M     0.19106875 W
SFO2     499.8419994 MHz

F2 - Processing parameters
SI       32768
SF       125.0984648 MHz
MCM      IM
ASB      0
LB       5.00 Hz
GB       0
PC       1.49
```

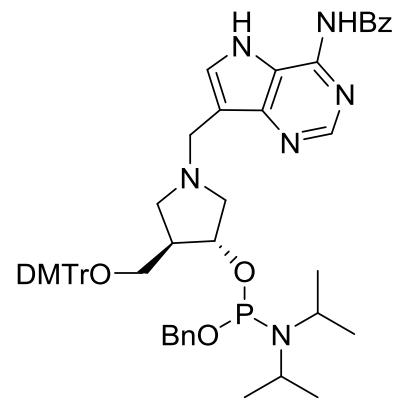

14

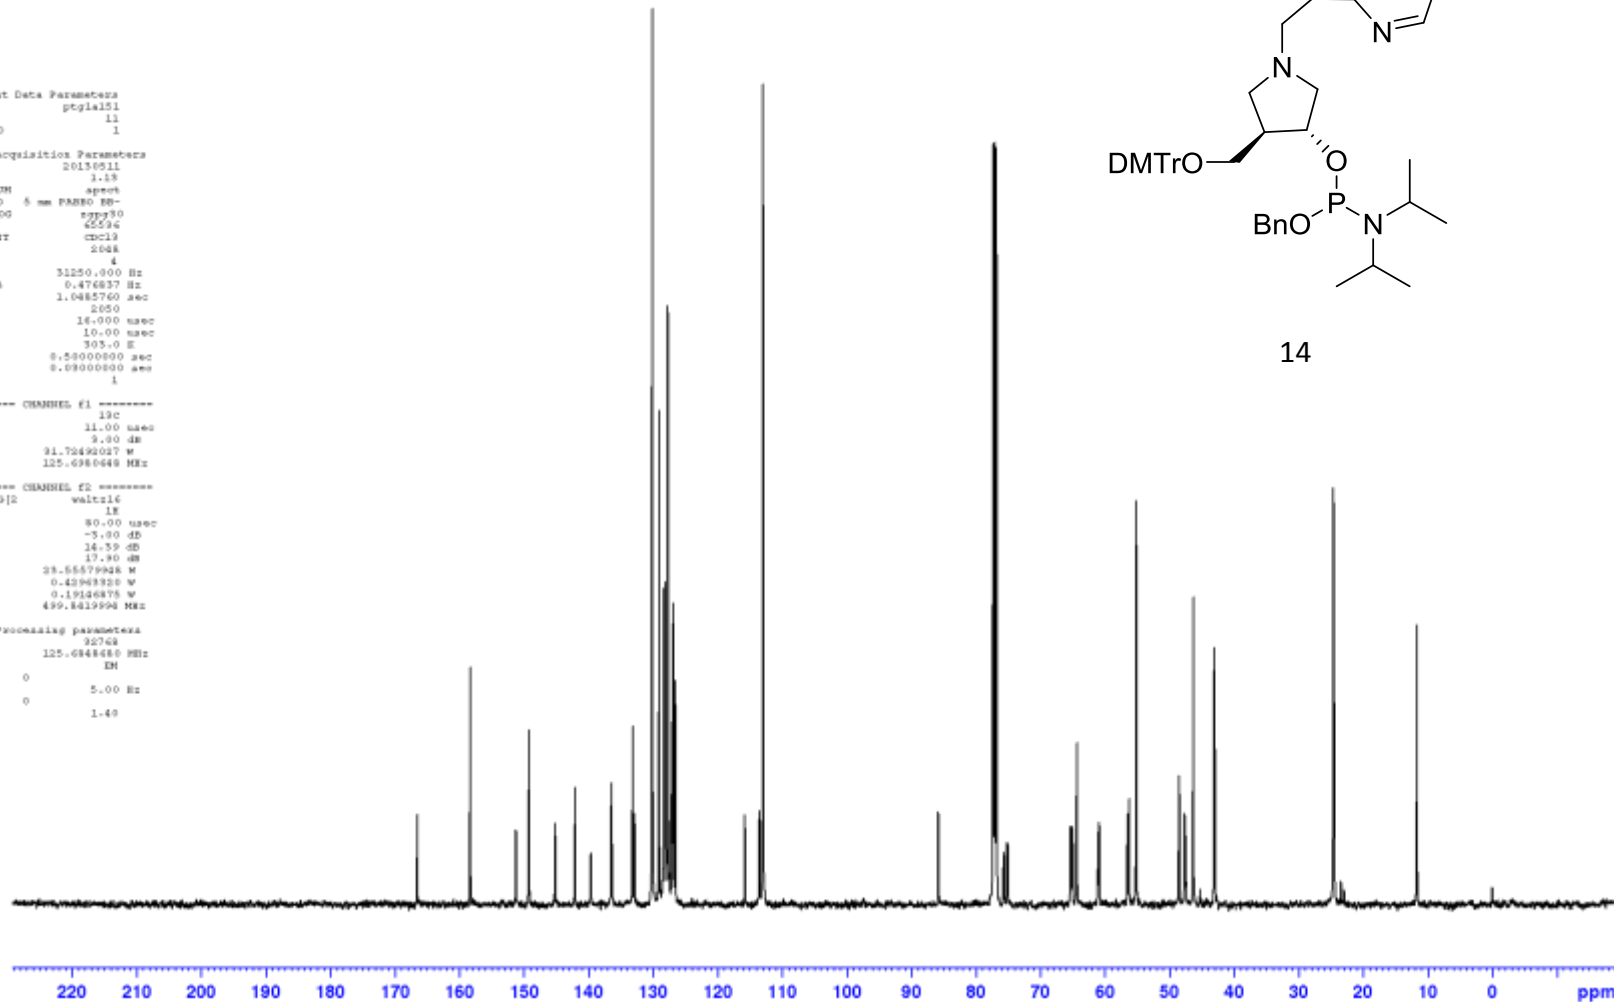

**<sup>31</sup>P NMR  
202 MHz**

```

Current Data Parameters
NAME      ptgl151
EXPNO    14
PROCNO   1

F2 - Acquisition Parameters
Date_    20130511
Time     2.16
INSTRUM  spect
PROBHD   5 mm PABBO BB-
PULPROG  zgpg30
TD       134072
SOLVENT  cdcl3
NS       32
DS       4
SFO      61521.742 Hz
FIDRES   0.621962 Hz
AQ       0.8039083 sec
RG       2550
DW       6.133 usec
DE       10.00 usec
IE       305.0 E
D3       2.0000000 sec
D11      0.0900000 sec
TEO      1

----- CHANNEL f1 -----
NUC1     31P
P1       10.40 usec
P11      5.00 dB
P11M     43.18969458 W
SFO1     202.3510864 MHz

***** CHANNEL f2 *****
CPDPRG2  waltz16
NUC2     1H
PCPD2    80.00 usec
P12      -3.80 dB
P112     14.39 dB
P113     17.80 dB
P12M     29.65579948 W
P112M    0.43968320 W
P113M    0.19166875 W
SFO2     499.8419994 MHz

F2 - Processing parameters
SI       65536
SF       202.3389410 MHz
MCW      IM
SAB      0
LB       5.00 Hz
GB       0
PC       1.49

```

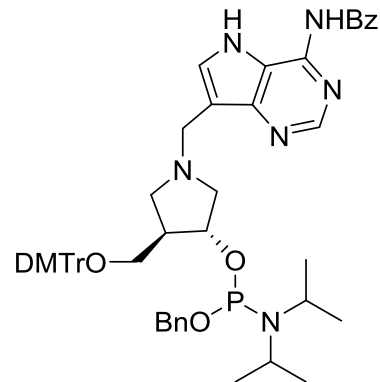

14

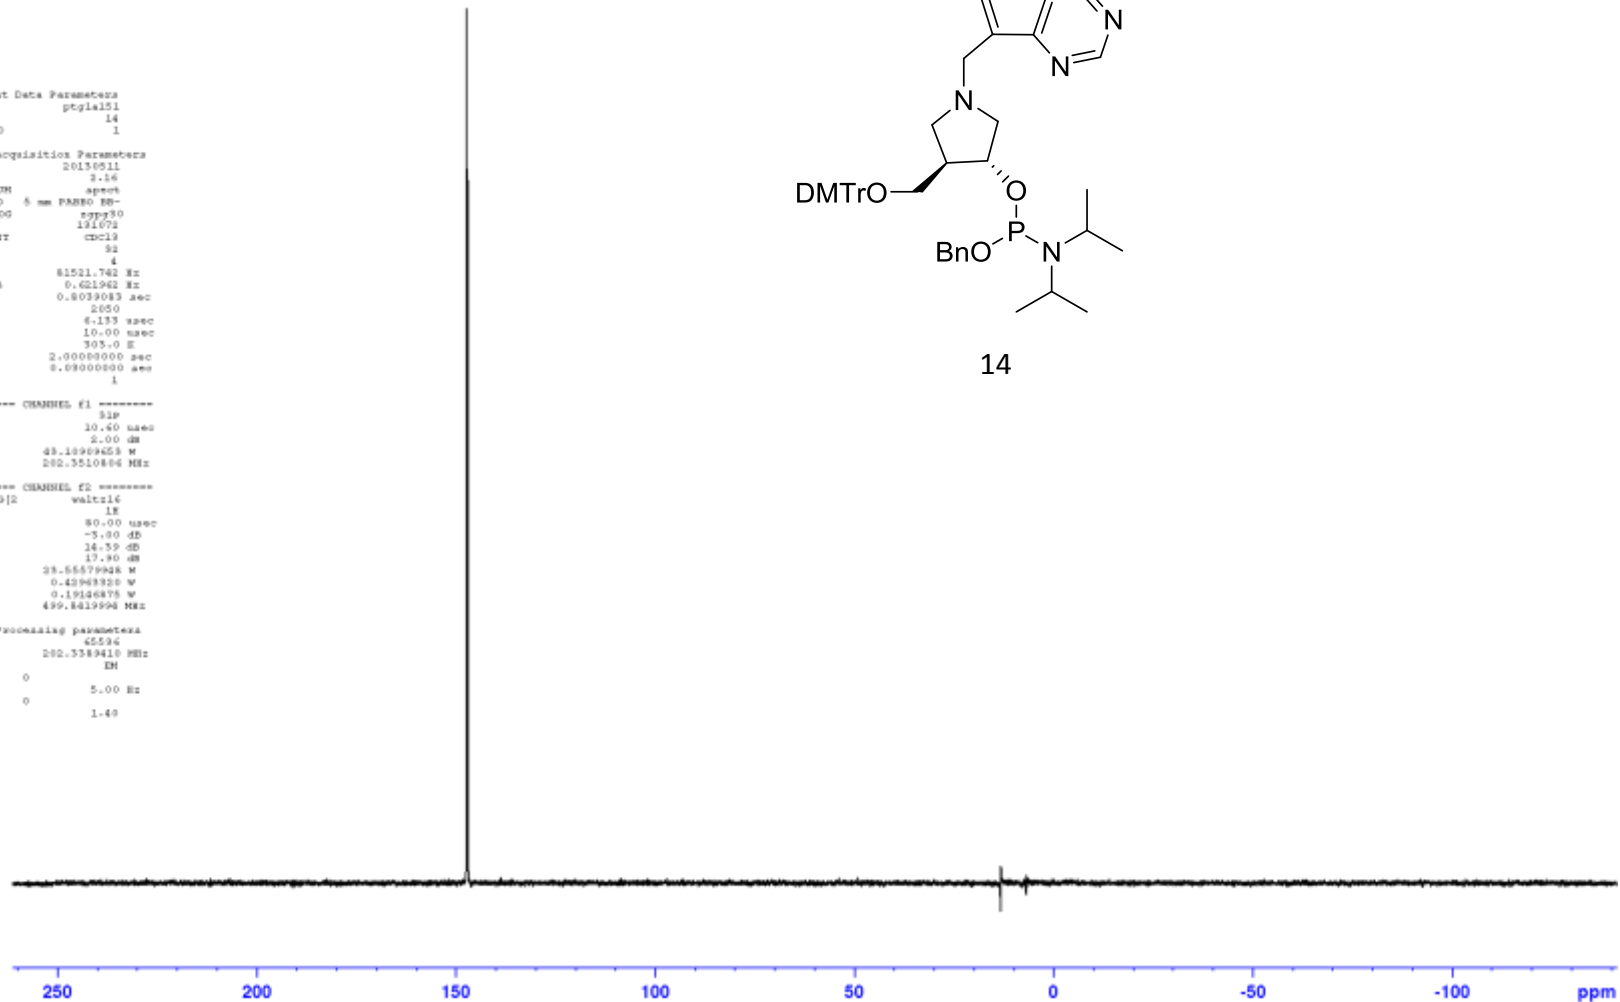

<sup>1</sup>H NMR  
500 MHz

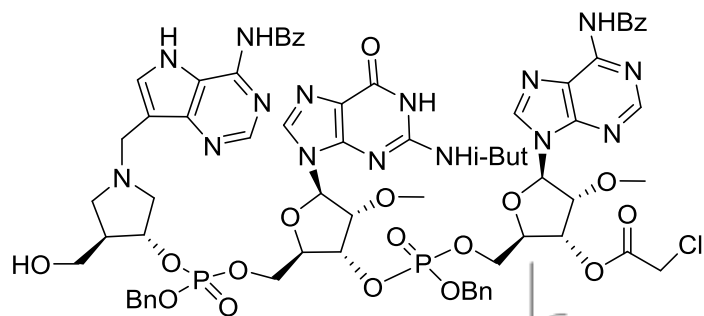

15

Current Data Parameters  
NAME ptglal49  
EXPNO 10  
PROCNO 1

F2 - Acquisition Parameters  
Date\_ 20130507  
Time 23:53  
INSTRUM spect  
PROBHD 5 mm PABBO BB-  
PULPROG zg30  
TD 45536  
SOLVENT cdcl3  
NS 32  
DS 2  
SWH 10302.198 Hz  
FIDRES 0.157199 Hz  
AQ 3.1806905 sec  
RG 161  
CW 48.533 usec  
DE 10.00 usec  
TE 300.2 K  
SI 1.0000000 sec  
TD0 1

----- CHANNEL f1 -----  
NUC1 1H  
P1 10.00 usec  
PL1 -2.00 dB  
PL1N 23.55579948 M  
SFO1 499.8420867 MHz

F2 - Processing parameters  
SI 32768  
SF 499.8400059 MHz  
NUC 1H  
SSB 0  
LB 0.30 Hz  
GB 0  
PC 1.00

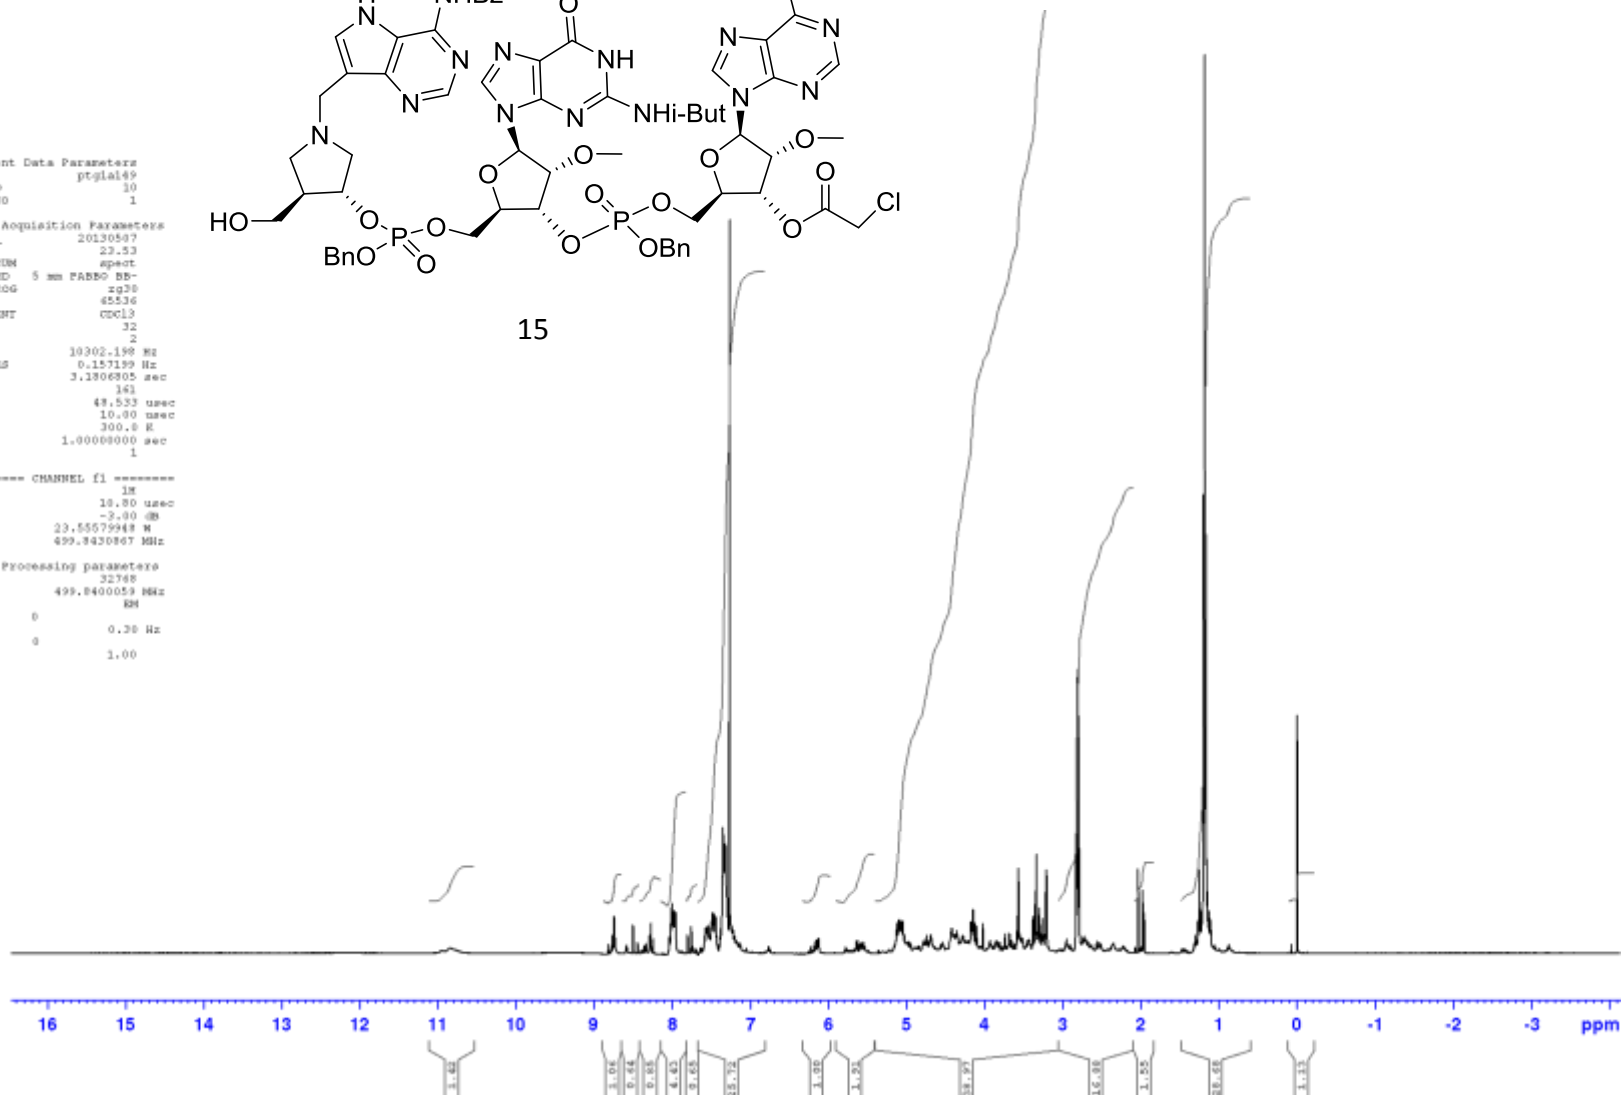

**<sup>13</sup>C NMR  
126 MHz**

```

Current Data Parameters
NAME      ptgl149
EXPNO    11
PROCNO   1

F2 - Acquisition Parameters
Date_    20130504
Time     1.54
INSTRUM  spect
PROBHD   5 mm PABBO BB-
PULPROG  zgpg30
TD       65536
SOLVENT  cpcl3
NS       4
DS       4
SWH      31250.000 Hz
FIDRES   0.474637 Hz
AQ       1.0485760 sec
RG       2050
DW       18.000 usec
DE       10.00 usec
TE       305.0 K
D3       8.58000000 sec
D11      8.09000000 sec
TEO      1
  
```

```

----- CHANNEL f1 -----
NUC1     13C
P1       11.00 usec
P11      9.00 dB
P11W    31.7049027 W
SFO1     125.0984648 MHz
  
```

```

----- CHANNEL f2 -----
CPDPRG2  waltz16
NUC2     1H
PCPD2    80.00 usec
P12      -3.00 dB
P112     14.39 dB
P113     17.80 dB
P12W    29.65579948 W
P112W    0.43968320 W
P113W    0.19166875 W
SFO2     499.8419994 MHz
  
```

```

F2 - Processing parameters
SI       32768
SF       125.0984648 MHz
MCW      1H
SAB      0
LB       5.00 Hz
GB       0
PC       1.49
  
```

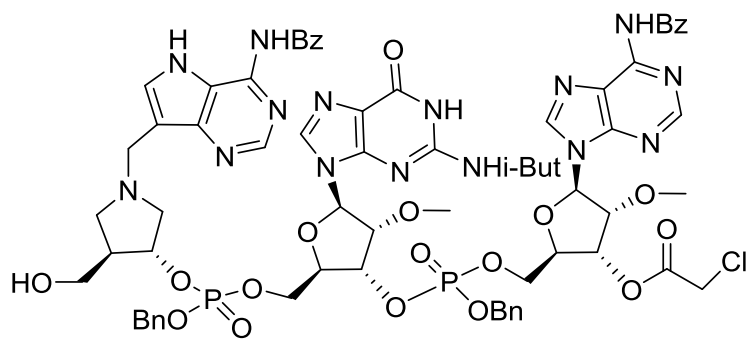

15

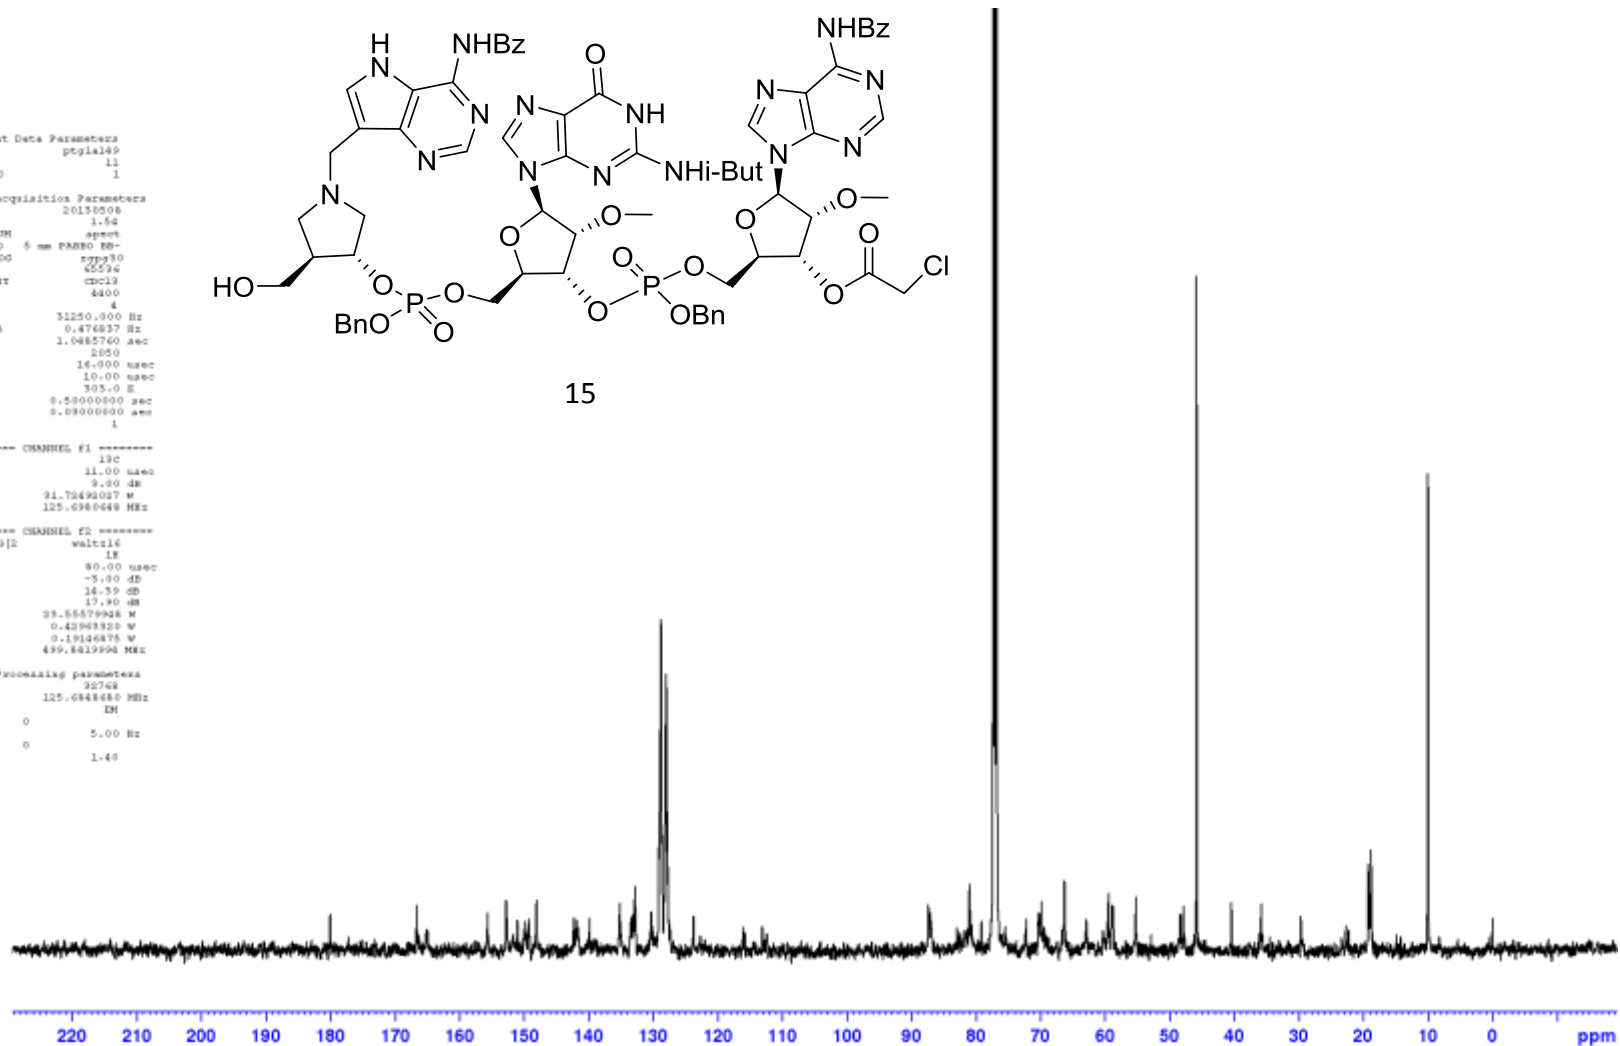









**<sup>31</sup>P NMR**  
**202 MHz**

```
Current Data Parameters
NAME      pgl160
EXPNO    14
PROCNO   1

F2 - Acquisition Parameters
Date_    20180404
Time     18.08
INSTRUM  spect
PROBHD   5 mm PABBO BB-
PULPROG  zgpg30
TD       131072
SOLVENT  cdcl3
NS       32
DS       4
SWH      81521.782 Hz
FIDRES   0.621962 Hz
AQ       0.8039083 sec
RG       2550
DW       6.133 usec
DE       10.00 usec
TE       303.0 K
D1       2.0000000 sec
d11      0.0900000 sec
TD0      1
```

```
----- CHANNEL f1 -----
NUC1     31P
P1       10.40 usec
P11      5.00 dB
P11M     48.1896828 W
SFO1     202.3510864 MHz
```

```
***** CHANNEL f2 *****
CPDPRG2  waltz16
NUC2     1H
PCPD2    80.00 usec
P2       -5.00 dB
P21      14.39 dB
P21M     17.80 dB
P21M     28.65579928 W
P11M     0.43968328 W
P11M     0.19186878 W
SFO2     499.8419994 MHz
```

```
F2 - Processing parameters
SI       65536
SF       202.3519410 MHz
MCW      IM
SAB      0
LB       5.00 Hz
GB       0
PC       1.49
```

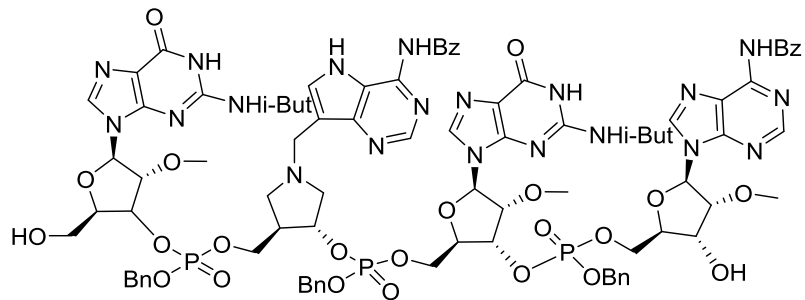



<sup>13</sup>C NMR  
126 MHz

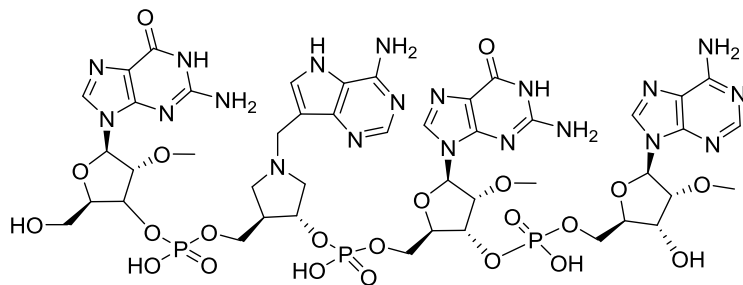

4

Current Data Parameters  
NAME ptg1a172  
EXPNO 11  
PROCNO 1

F2 - Acquisition Parameters  
Date\_ 20150110  
Time 10:38  
INSTRUM spect  
PROBHD 5 mm PABBO BB-  
PULPROG zgpg30  
TD 65536  
SOLVENT D2O  
NS 54000  
DS 4  
SWH 31250.000 Hz  
FIDRES 0.476837 Hz  
AQ 1.0485760 sec  
RG 2050  
DW 18.000 usec  
DE 10.00 usec  
TE 305.0 K  
D3 8.58000000 sec  
D11 8.99000000 sec  
TEO 1

----- CHANNEL f1 -----  
NUC1 13C  
P1 11.00 usec  
PL1 9.80 dB  
PL12 21.7049027 W  
SFO1 125.0984648 MHz

----- CHANNEL f2 -----  
CHOPPRP2 waltz16  
NUC2 1H  
PCPD2 80.00 usec  
P12 -3.80 dB  
PL12 14.39 dB  
PL13 17.80 dB  
PL2W 29.65579928 W  
PL13W 0.43968320 W  
PL13W 0.19186875 W  
SFO2 499.8419994 MHz

F2 - Processing parameters  
SI 32768  
SF 125.0984648 MHz  
MCM 1H  
SAB 0  
LB 3.00 Hz  
GB 0  
PC 1.49

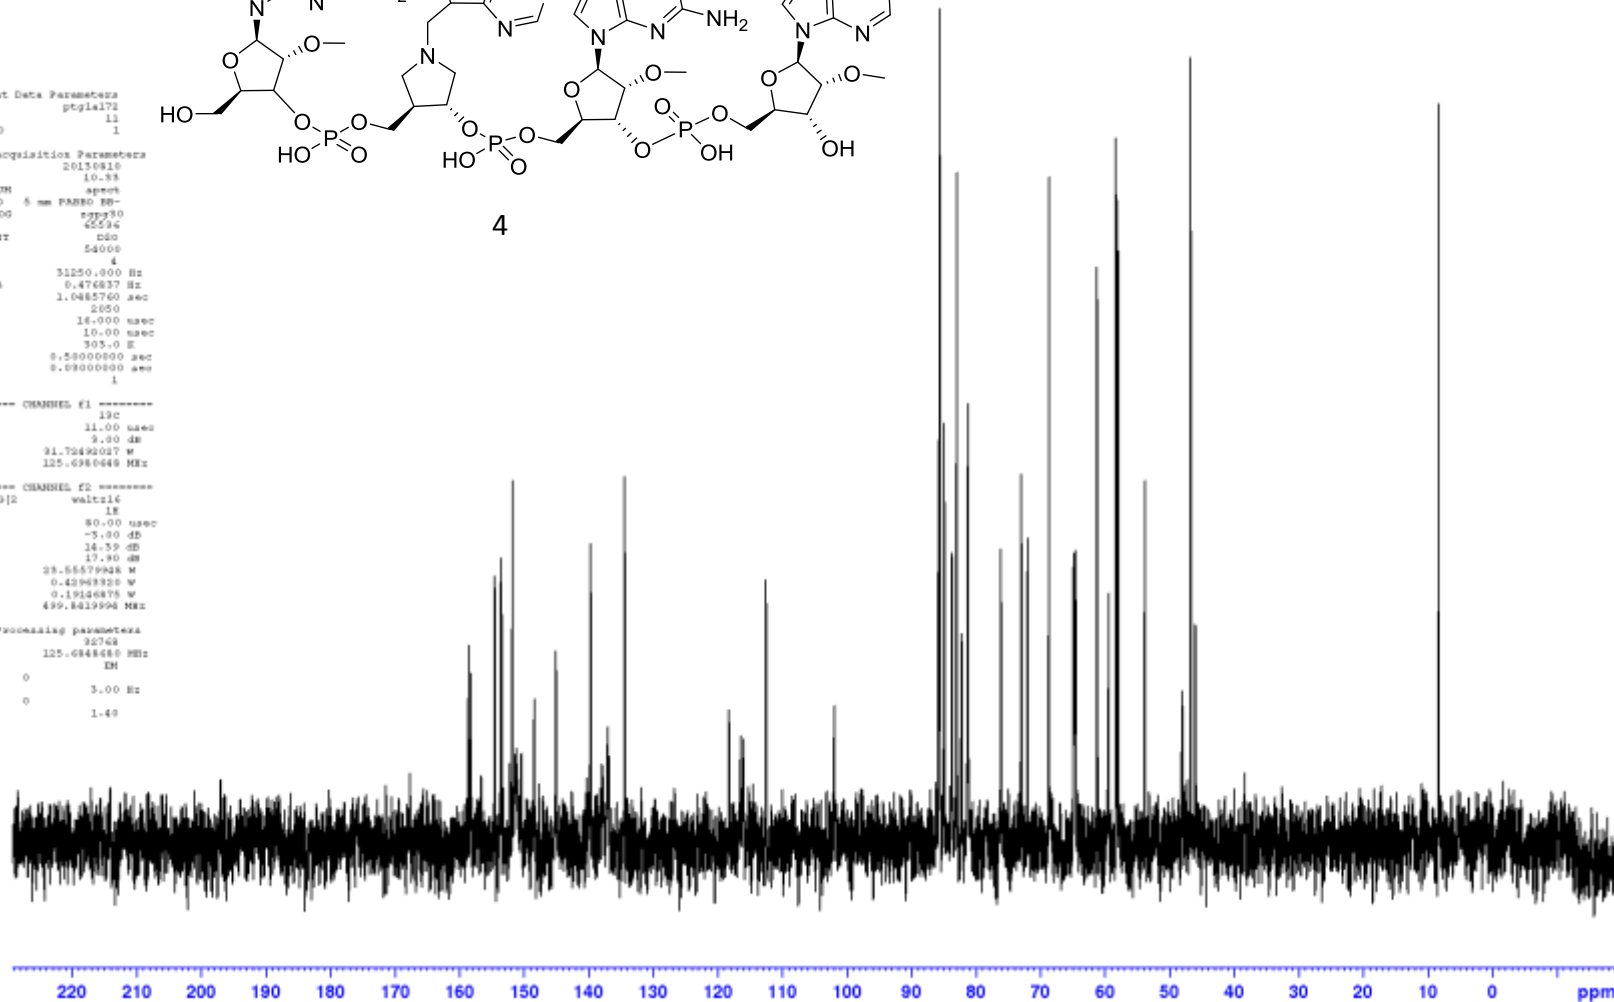

**<sup>31</sup>P NMR  
202 MHz**

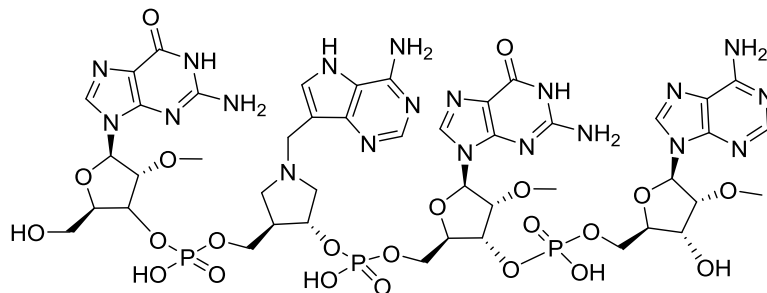

4

Current Data Parameters  
NAME ptglal72  
EXPNO 14  
PROCNO 1  
F2 - Acquisition Parameters  
Date\_ 20130412  
Time 9:41  
INSTRUM spect  
PROBHD 5 mm PABBO BB-  
PULPROG zgpg30  
TD 131072  
SOLVENT D2O  
NS 640  
DS 4  
SWH 61521.782 Hz  
FIDRES 0.621962 Hz  
AQ 0.8039083 sec  
RG 2550  
DW 6.133 usec  
DE 10.00 usec  
TE 303.0 K  
D3 2.0000000 sec  
D11 0.0900000 sec  
TEO 1

----- CHANNEL f1 -----  
NUC1 31P  
P1 10.40 usec  
PL1 5.00 dB  
P1M 48.1896828 W  
SFO1 202.3510846 MHz

\*\*\*\*\* CHANNEL f2 \*\*\*\*\*  
CHOPPR2 wait216  
NUC2 1H  
PCPD2 80.00 usec  
P12 -5.00 dB  
P1L2 14.39 dB  
P1L3 17.80 dB  
P1M 28.65579948 W  
P1L1M 0.43968328 W  
P1L1W 0.19186878 W  
SFO2 499.8419994 MHz

F2 - Processing parameters  
SI 65536  
SF 202.338410 MHz  
MEM 1M  
SAB 0  
LB 5.00 Hz  
GB 0  
PC 1.49

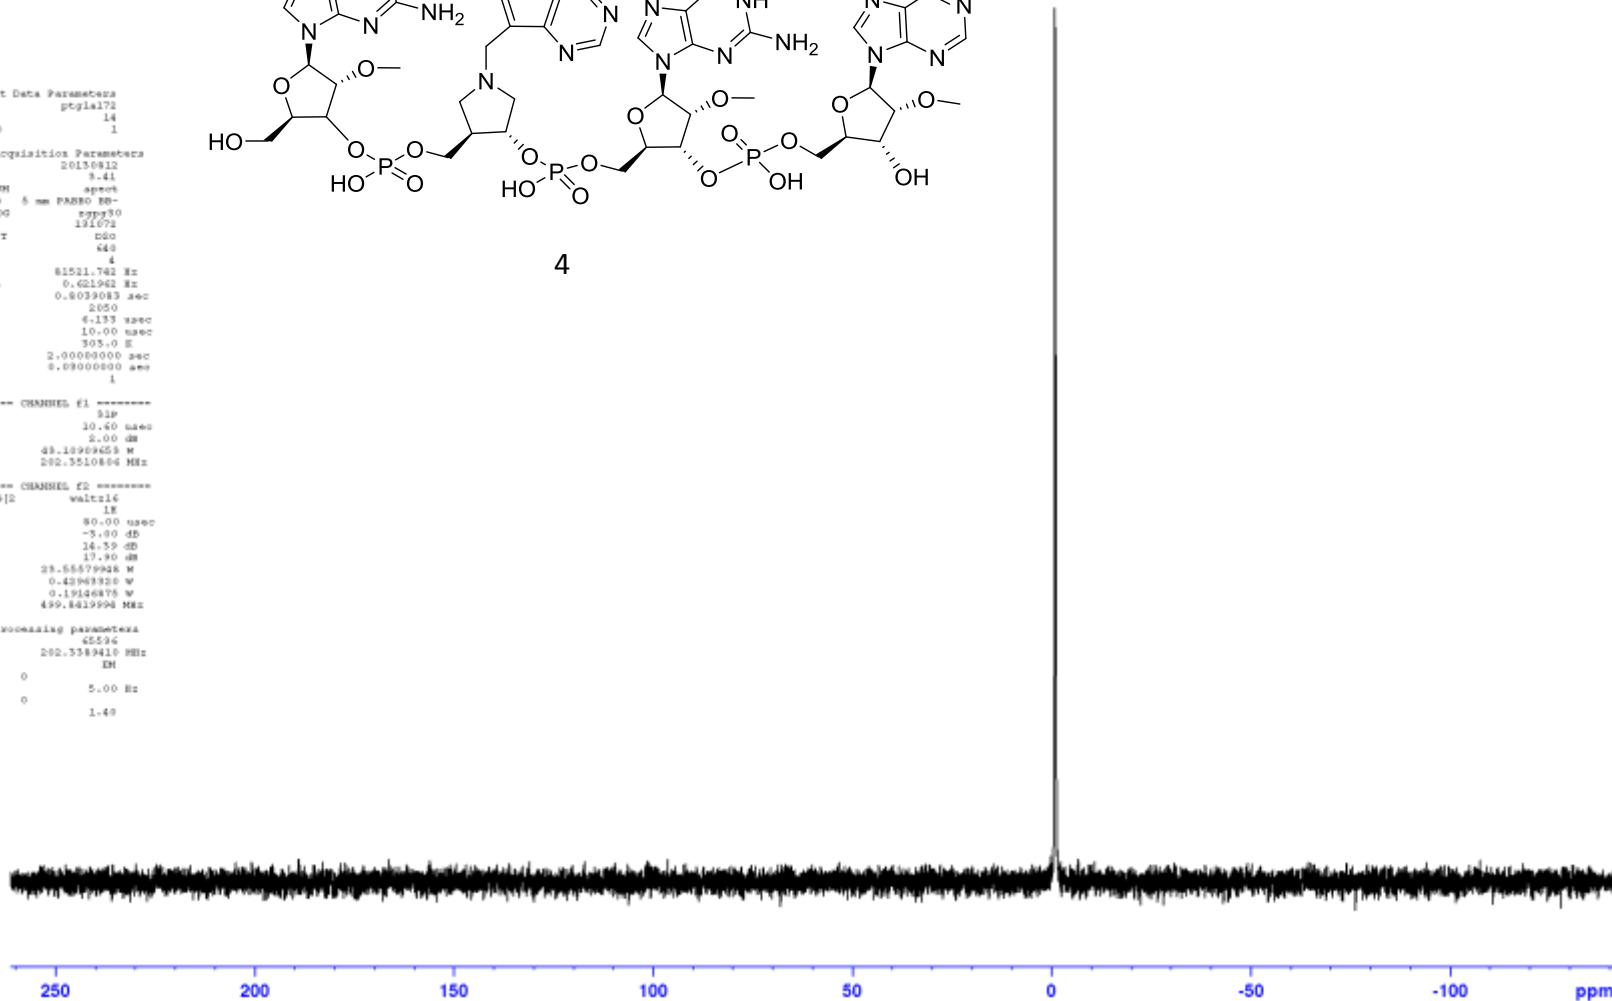

<sup>1</sup>H NMR  
500 MHz

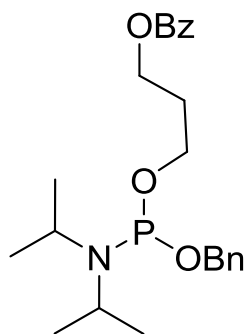

17

Current Data Parameters  
NAME jmsG11c  
EXPNO 10  
PROCNO 1

F2 - Acquisition Parameters  
Date\_ 20120918  
Time 11.48  
INSTRUM spect  
PROBHD 5 mm PABBO BB-  
PULPROG zgpg30  
TD 65536  
SOLVENT CDCl3  
NS 32  
DS 2  
SWH 10336.578 Hz  
FIDRES 0.157632 Hz  
AQ 3.1719425 sec  
RG 128  
CW 49.409 usec  
DE 6.50 usec  
TE 303.2 K  
DQ 1.0000000 sec  
TDO 1

----- CHANNEL f1 -----  
NUC1 1H  
P1 11.20 usec  
PL1 1.00 dB  
PL1W 18.35641289 W  
SFO1 500.0530880 MHz

F2 - Processing parameters  
SI 32768  
SF 500.0500195 MHz  
NM 65536  
SSB 0  
LA 0.39 Hz  
GB 0  
PC 1.00

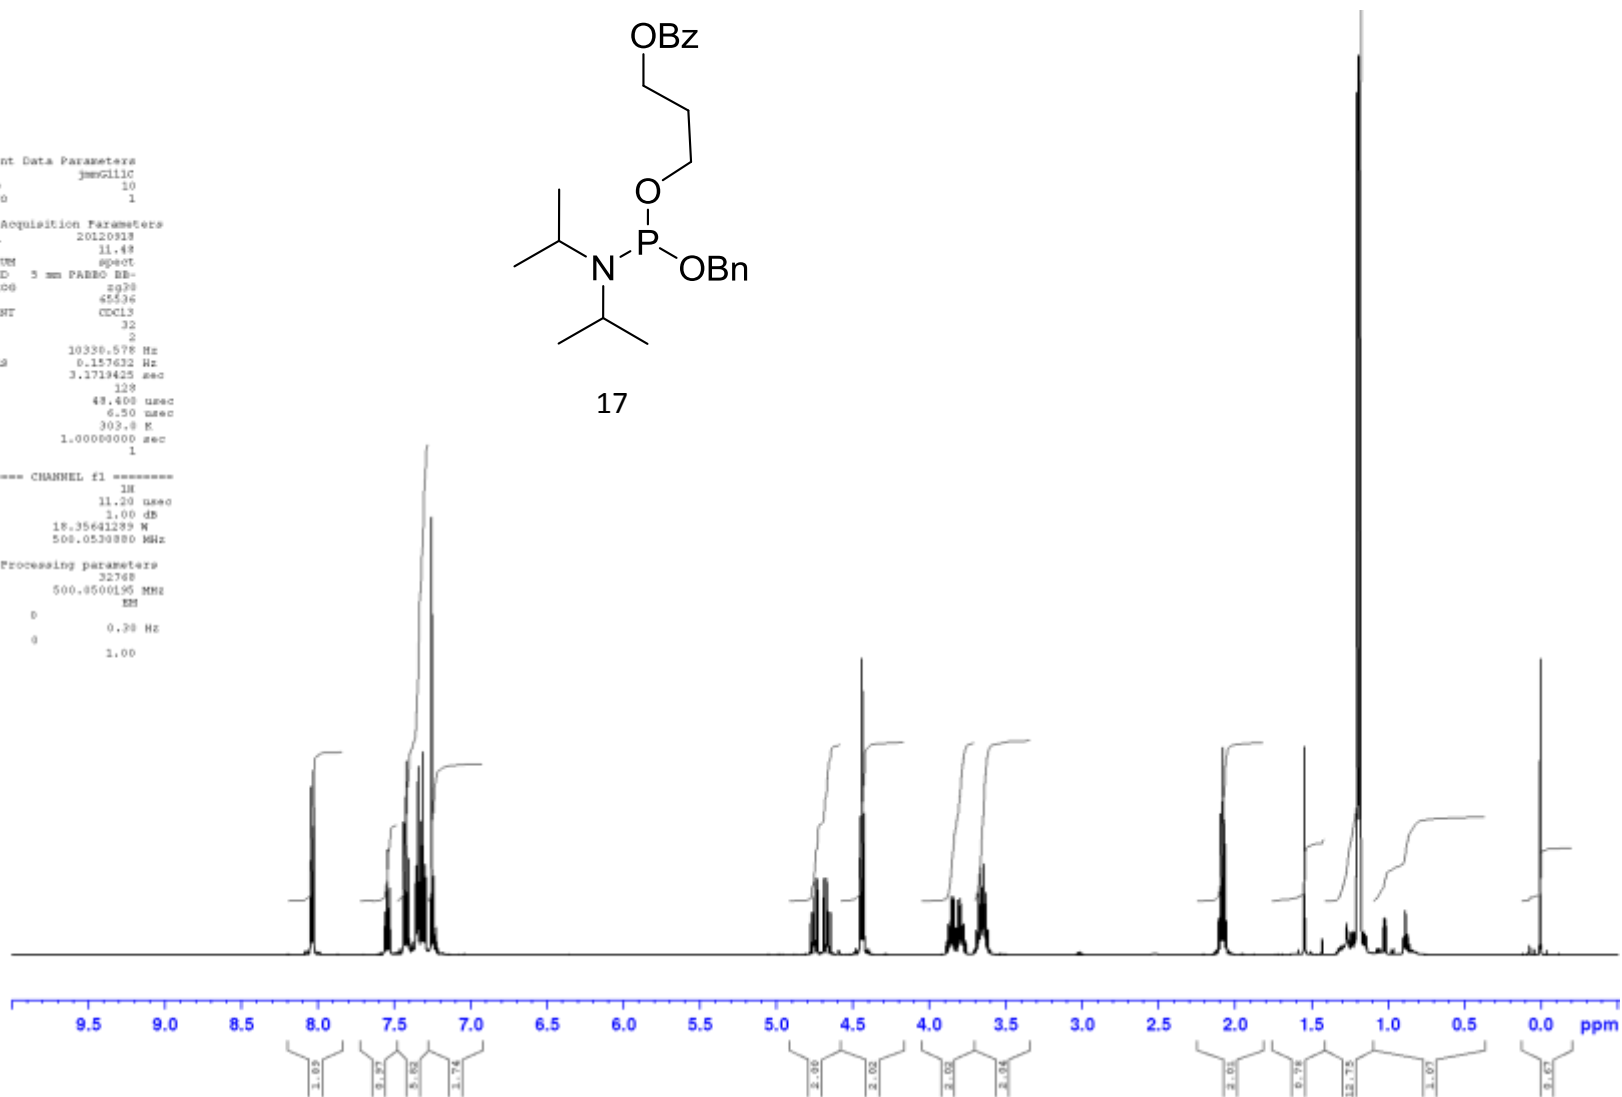

<sup>13</sup>C NMR  
126 MHz

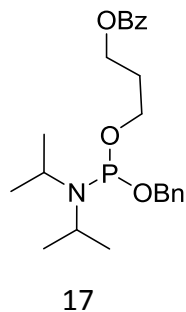

```
Current Data Parameters
NAME      Jmgg052
EXPNO     11
PROCNO    1

F2 - Acquisition Parameters
Date_     20120613
Time      7.35
INSTRUM   spect
PROBHD    5 mm PABBO BB-
PULPROG   zgpg30
TD        65536
SOLVENT   cpd13
NS        2400
DS        4
SWH        31250.000 Hz
FIDRES    0.476837 Hz
AQ        1.0485760 sec
RG        2050
DW        18.000 usec
DE        10.00 usec
TE        303.0 K
D3        0.50000000 sec
D11       0.09000000 sec
TEO       1

----- CHANNEL f1 -----
NUC1      13C
P1        11.20 usec
P11       5.00 dB
P11M     34.90481299 W
SFO1      125.0981648 MHz

----- CHANNEL f2 -----
CPDPRG2   waltz16
NUC2      1H
PCPD2     80.00 usec
P12       -3.00 dB
P112     14.39 dB
P113     17.90 dB
P12M     29.65579928 W
P112M    0.42969320 W
P113M    0.19136875 W
SFO2     499.8419994 MHz

F2 - Processing parameters
SI        32768
SF        125.0981648 MHz
MCW       IM
SAB       0
LB        3.00 Hz
GB        0
PC        1.40
```

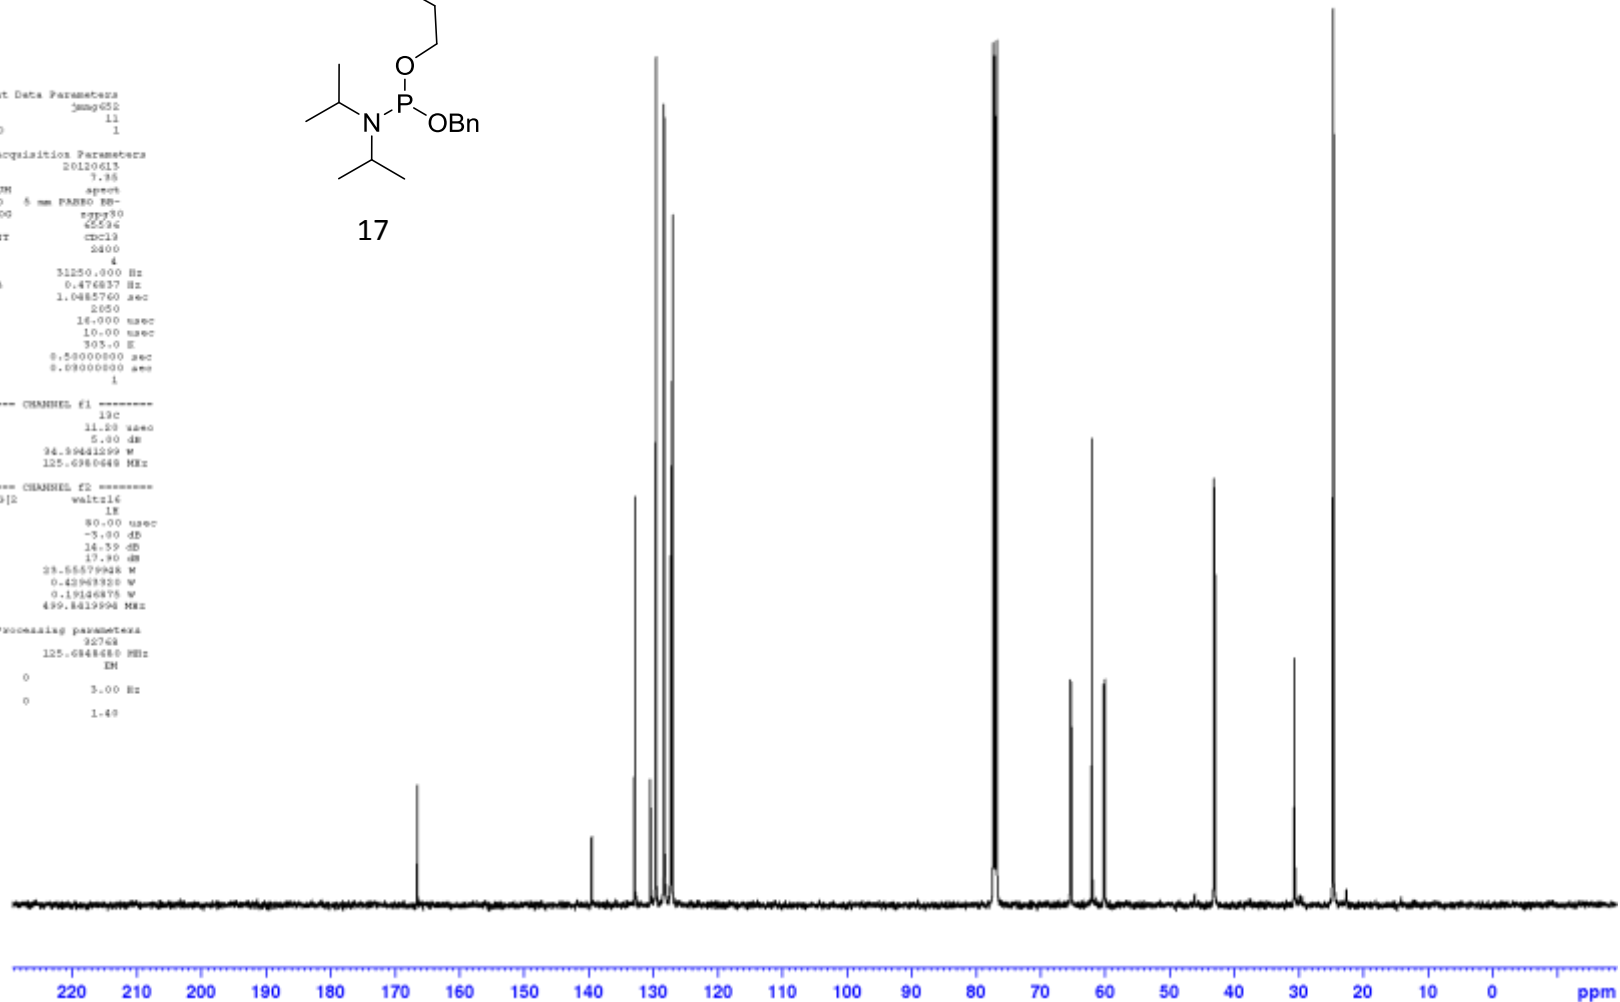



**<sup>31</sup>P NMR  
202 MHz**

```
Current Data Parameters
NAME          janshlic
EXPNO        11
PROCNO       1

F2 - Acquisition Parameters
Date_        20120918
Time         11:52
INSTRUM      spect
PROBHD       5 mm PABBO BB-
PULPROG      zgpg30
TD           131072
SOLVENT      CDCl3
HG           32
DS           4
SWH          81521.742 Hz
FIDRES       0.621962 Hz
AQ           0.8035083 sec
RG           2058
DW           6.123 usec
DE           6.50 usec
TE           299.2 K
D1           3.0000000 sec
d11          0.02000000 sec
TE0          1

----- CHANNEL f1 -----
NUC1         31P
P1           18.40 usec
P11          -1.00 dB
P1LM        55.50078523 W
SFO1        202.4340954 MHz

----- CHANNEL f2 -----
CPDPRG2      mlticlic
NUC2         1H
PCPD2        80.00 usec
P12          1.00 dB
P1L2        19.08 dB
P1L3        21.10 dB
P1LM        18.35641289 W
P1L2M       0.35907363 W
P1L3M       0.17948569 W
SFO2        500.0520082 MHz

F2 - Processing parameters
SI           65536
SF           202.4239500 MHz
NCM          324
ZSN          0
LB           3.00 Hz
GB           0
PC           1.40
```

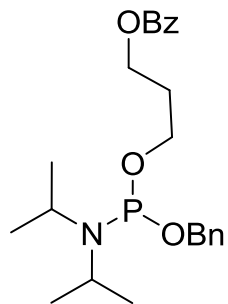

17

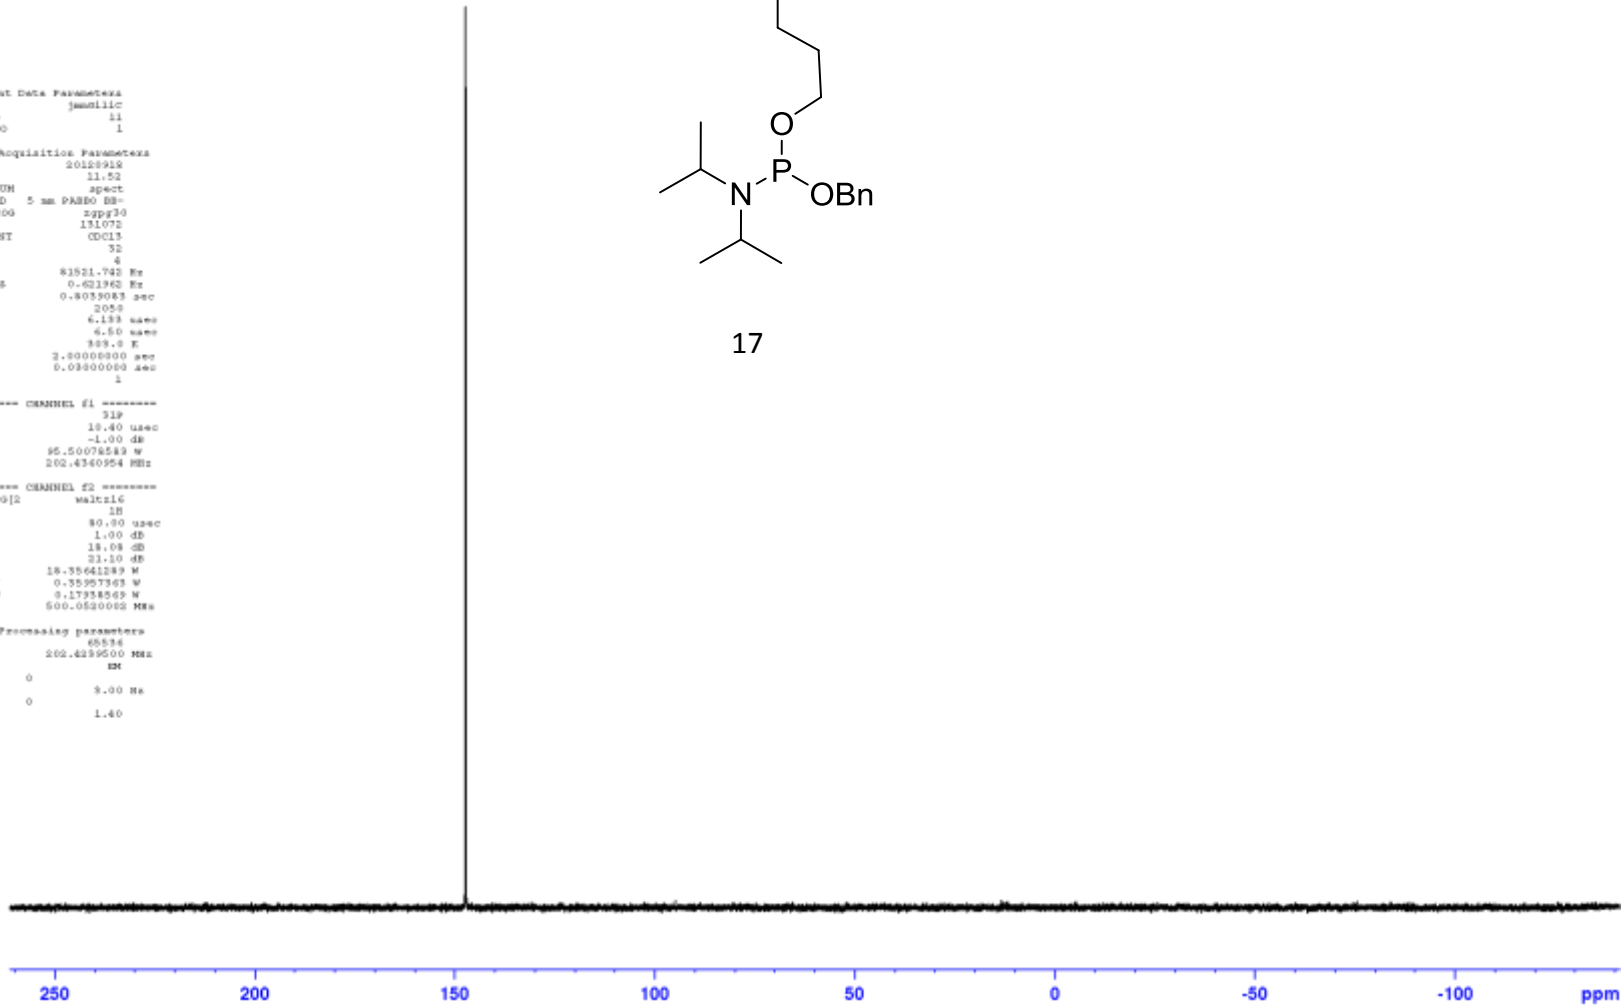

<sup>1</sup>H NMR  
500 MHz

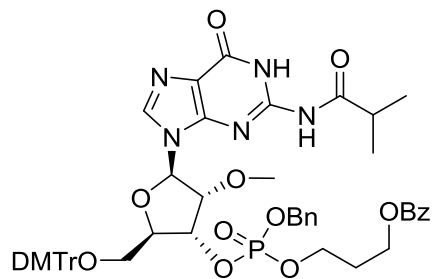

```
Current Data Parameters
NAME      jmg221
EXPNO    10
PROCNO   1

F2 - Acquisition Parameters
Date_    20121031
Time     8.35
INSTRUM  spect
PROBHD   5 mm PABBO BBI-
PULPROG  zg30
TD       65536
SOLVENT  CDCl3
NS       32
DS       2
SWH      10330.578 Hz
FIDRES   0.157432 Hz
AQ       3.1719425 sec
RG       101
DM       48.400 usec
DC       6.50 usec
TE       303.0 K
D1       1.00000000 sec
TDO      1

----- CHANNEL f1 -----
NUC1     1H
P1       31.20 usec
PL1      18.25400000 W

F2 - Processing parameters
SI       32768
SF       500.0509131 MHz
WDW      EM
SSB      0
LB       0.30 Hz
GB       0
PC       1.00
```

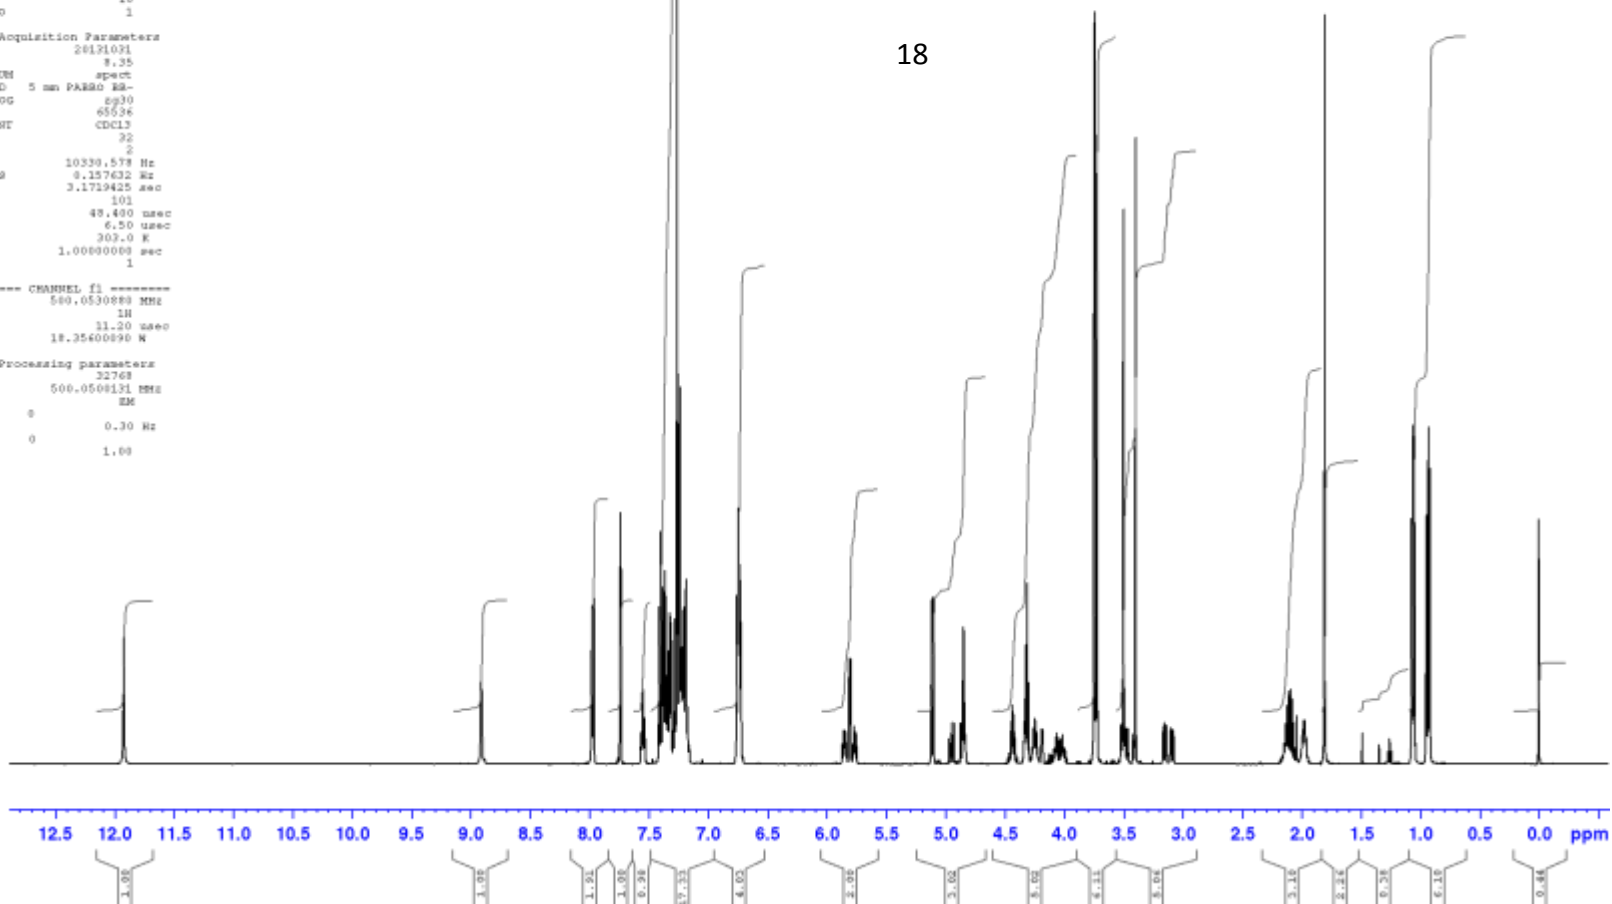

**<sup>13</sup>C NMR  
126 MHz**

```

Current Data Parameters
NAME      gbal2004a
EXPNO    11
PROCNO   1

F2 - Acquisition Parameters
Date_    20120630
Time     7.26
INSTRUM  spect
PROBHD   5 mm PABBO BB-
PULPROG  zgpg30
TD       65536
SOLVENT  cpd13
NS       4800
DS       4
SFO      31250.000 Hz
FIDRES   0.476837 Hz
AQ       1.0485760 sec
RG       133
DM       16.000 usec
DE       15.08 usec
TE       303.0 K
D3       0.58000000 sec
D11      0.09000000 sec
TEO      1

----- CHANNEL f1 -----
NUC1     13C
P1       9.00 usec
P11      -1.00 dB
P11W    123.9412884 W
SFO1     125.7508755 MHz

***** CHANNEL f2 *****
CPDPRG2  waltz16
NUC2     1H
PCPD2    80.00 usec
P12      1.00 dB
P12W    19.38 dB
P13      21.10 dB
P13W    18.95441289 W
P13M    0.35867363 W
P13W    0.17984569 W
SFO2     500.0520002 MHz

F2 - Processing parameters
SI       32768
SF       125.7376726 MHz
MCM      IM
ASB      0
LB       3.00 Hz
GB       0
PC       1.40
  
```

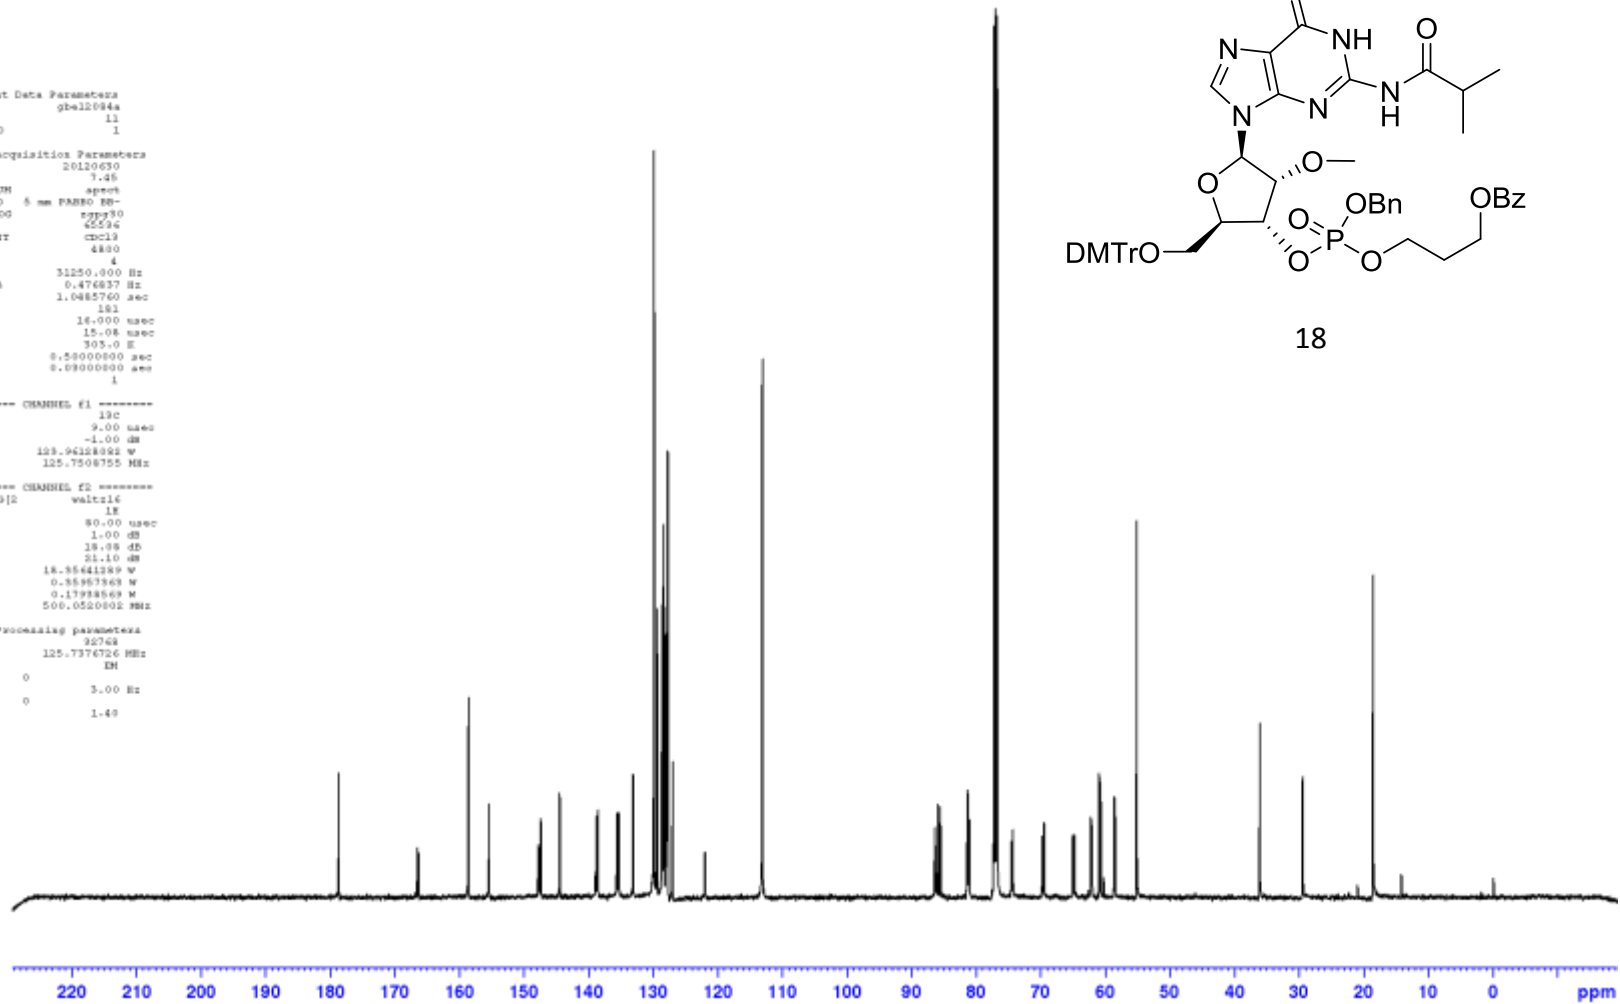

<sup>31</sup>P NMR  
202 MHz

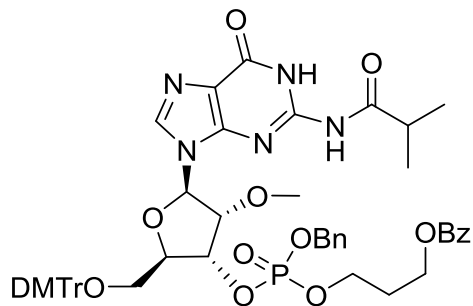

18

```
Current Data Parameters
NAME          jmac117
EXPNO         11
PROCNO        1

F2 - Acquisition Parameters
Date_         20120919
Time          10:21
INSTRUM       spect
PROBHD        5 mm PABBO BB-
PULPROG       zgpg30
TD            131072
SOLVENT       CDCl3
NS            32
DS            4
SWH           81521.742 Hz
FIDRES       0.621962 Hz
AQ           0.8035083 sec
RG           2058
DW           6.123 usec
DE           6.50 usec
TE           300.2 K
D1           3.0000000 sec
d11          0.03000000 sec
TE0          1

----- CHANNEL f1 -----
NUC1          31P
P1           18.40 usec
P11          -1.00 dB
P1LM        55.50078523 W
SFO1         202.4340954 MHz

----- CHANNEL f2 -----
CHOPPRG2     mltic
NUC2          1H
PCPD2        80.00 usec
P12          1.00 dB
P1L2         19.08 dB
P1L3         21.10 dB
P1LM        18.35641289 W
P1LMW        0.35907363 W
P1LMW        0.17384569 W
SFO2         500.0520082 MHz

F2 - Processing parameters
SI           65536
SF           202.4239500 MHz
NCM          324
ZSN          0
LB           3.00 Hz
GB           0
PC           1.40
```

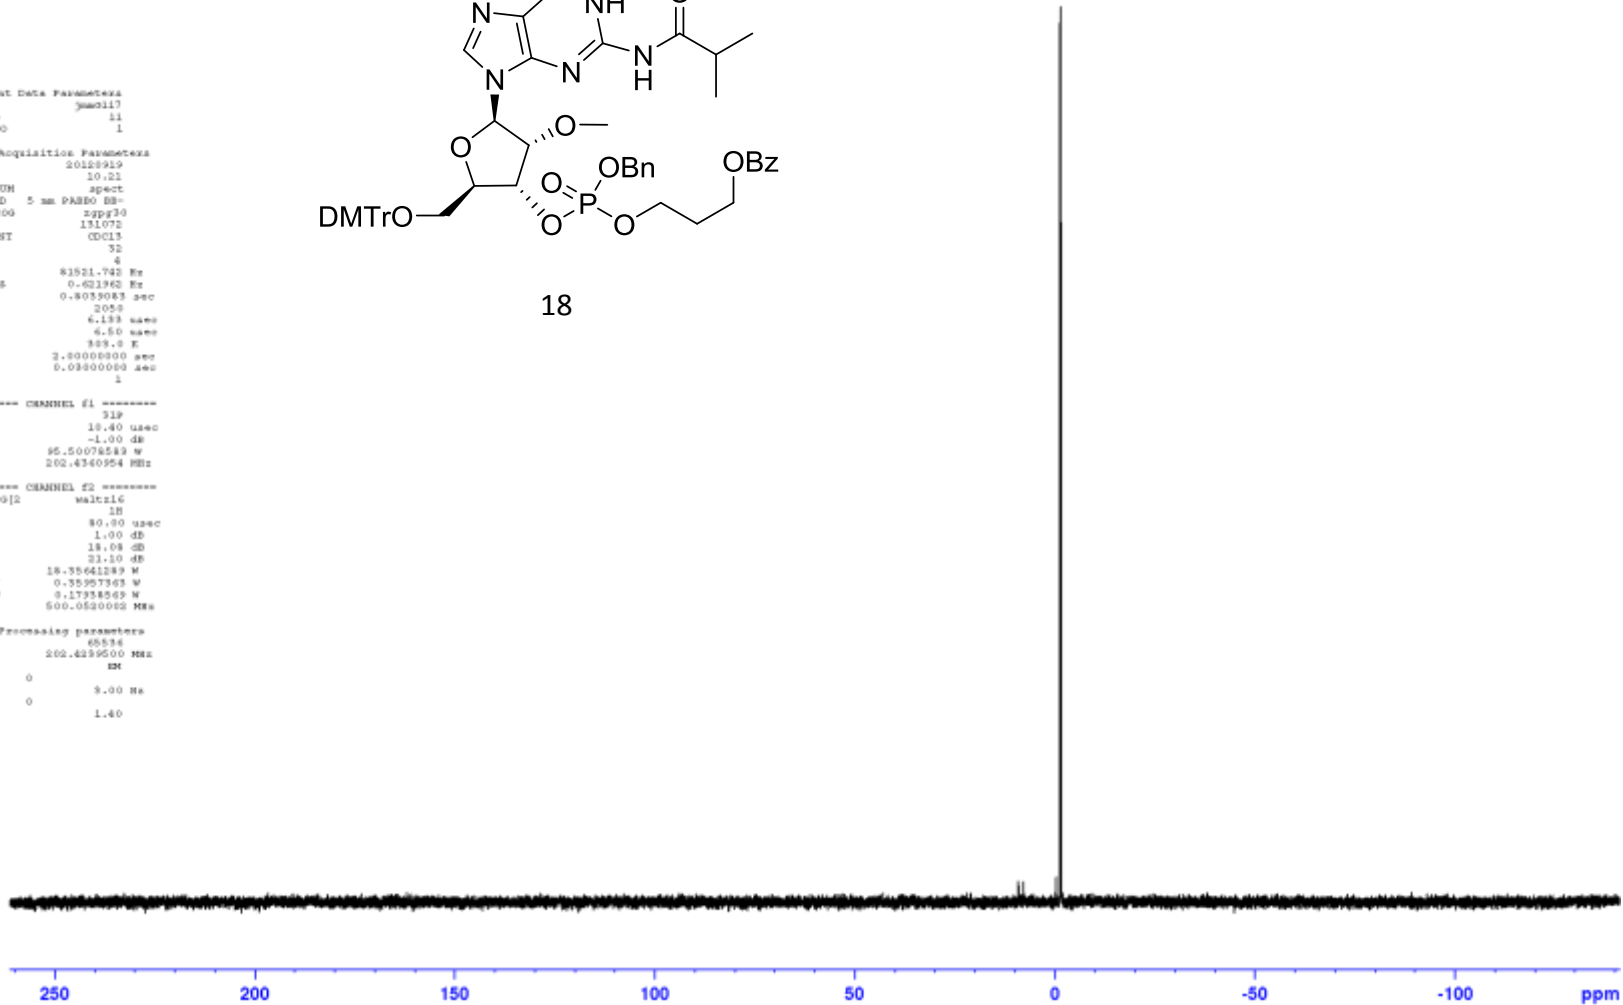



<sup>13</sup>C NMR  
126 MHz

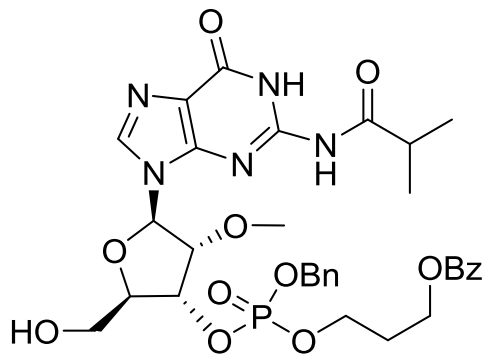

19

```
Current Data Parameters
NAME      jms074-2
EXPNO    11
PROCNO   1
-----
F2 - Acquisition Parameters
Date_    20120626
Time     12:16
INSTRUM  spect
PROBHD   5 mm PABBO BB-
PULPROG  zgpg30
TD       65536
SOLVENT  cpd13
NS       830
DS       4
SFO      31250.000 Hz
FIDRES   0.476837 Hz
AQ       1.0485760 sec
RG       2050
DW       18.000 usec
DE       10.000 usec
TE       303.0 K
D3       8.59000000 sec
D11      8.09000000 sec
TEO      1
-----
```

```
----- CHANNEL f1 -----
NUC1     13C
P1       11.20 usec
P11      5.80 dB
P1LM     34.59481299 W
SFO1     125.0981648 MHz
-----
```

```
----- CHANNEL f2 -----
CPDPRG2  waltz16
NUC2     1H
PCPD2    80.00 usec
P12      -3.80 dB
P112     14.39 dB
P113     17.80 dB
P12M     29.65579928 W
P112M    0.42968320 W
P113M    0.19166875 W
SFO2     499.8419994 MHz
-----
```

```
F2 - Processing parameters
SI       32768
SF       125.0981648 MHz
MCW      IM
SAB      0
LB       3.00 Hz
GB       0
PC       1.49
```

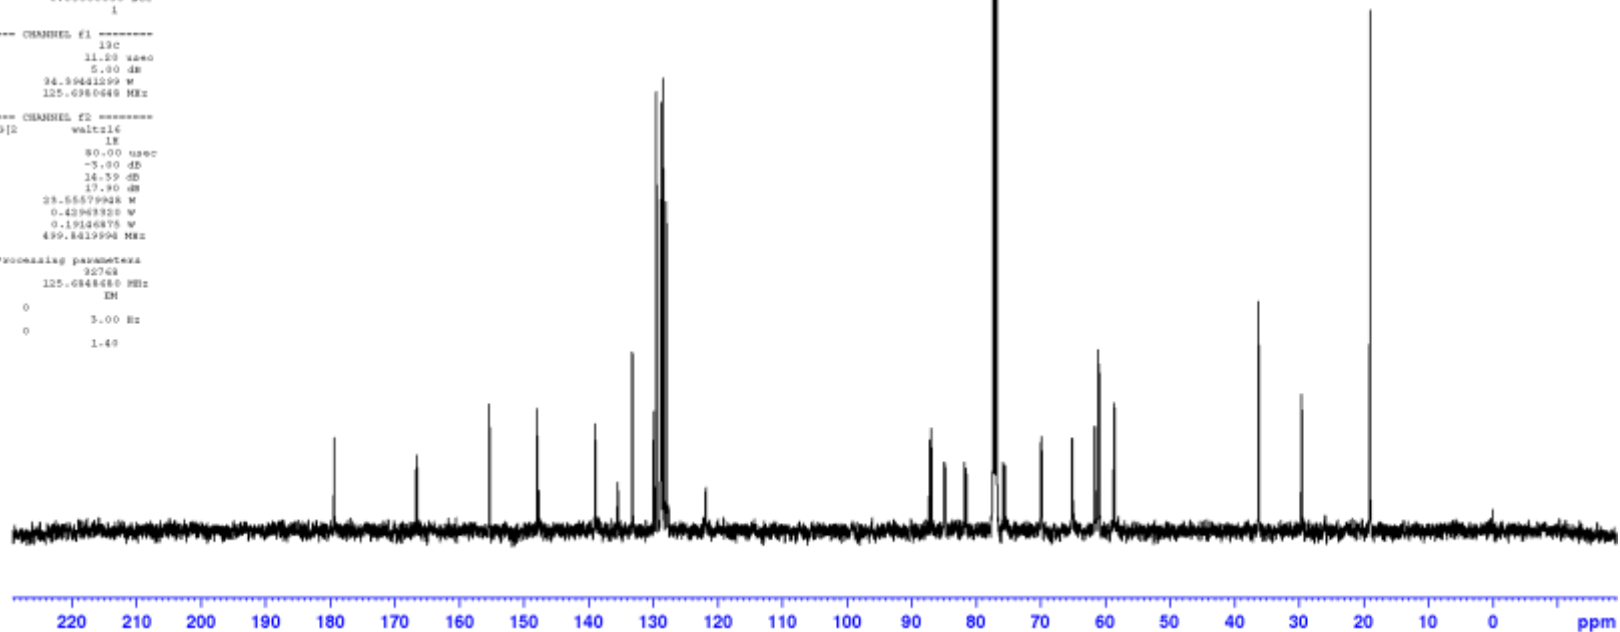

**<sup>31</sup>P NMR  
202 MHz**

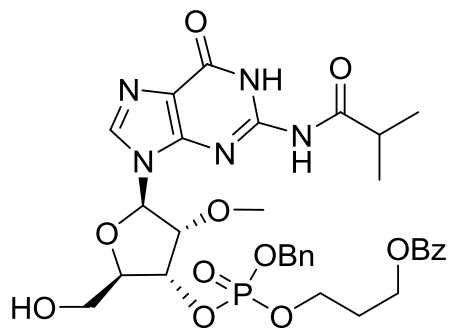

19

Current Data Parameters  
NAME 3mg270  
EXPNO 11  
PROCNO 1  
F2 - Acquisition Parameters  
Date\_ 20131009  
Time 12:44  
INSTRUM spect  
PROBHD 5 mm PABBO DD-  
PULPROG zgpg30  
TD 134872  
SOLVENT cdcl3  
NS 32  
DS 4  
SWH 81521.742 Hz  
FIDRES 0.621962 Hz  
AQ 0.8039083 sec  
RG 250  
DW 6.133 usec  
DE 10.00 usec  
TE 303.1 K  
D3 2.0000000 sec  
D31 0.0900000 sec  
TEO 1

----- CHANNEL f1 -----  
NUC1 31P  
P1 10.40 usec  
P11 5.00 dB  
PL1W 43.1896828 W  
SFO1 202.3510846 MHz

\*\*\*\*\* CHANNEL f2 \*\*\*\*\*  
CHOPPR2 Waltz16  
NUC2 1H  
PCPD2 80.00 usec  
P12 -5.00 dB  
P112 14.39 dB  
P113 17.80 dB  
PL2W 29.65579928 W  
PL12W 0.43968320 W  
PL13W 0.19166875 W  
SFO2 499.8419994 MHz

F2 - Processing parameters  
SI 65596  
SF 202.3519410 MHz  
MCM 3H  
SAB 0  
LB 5.00 Hz  
GB 0  
PC 1.43

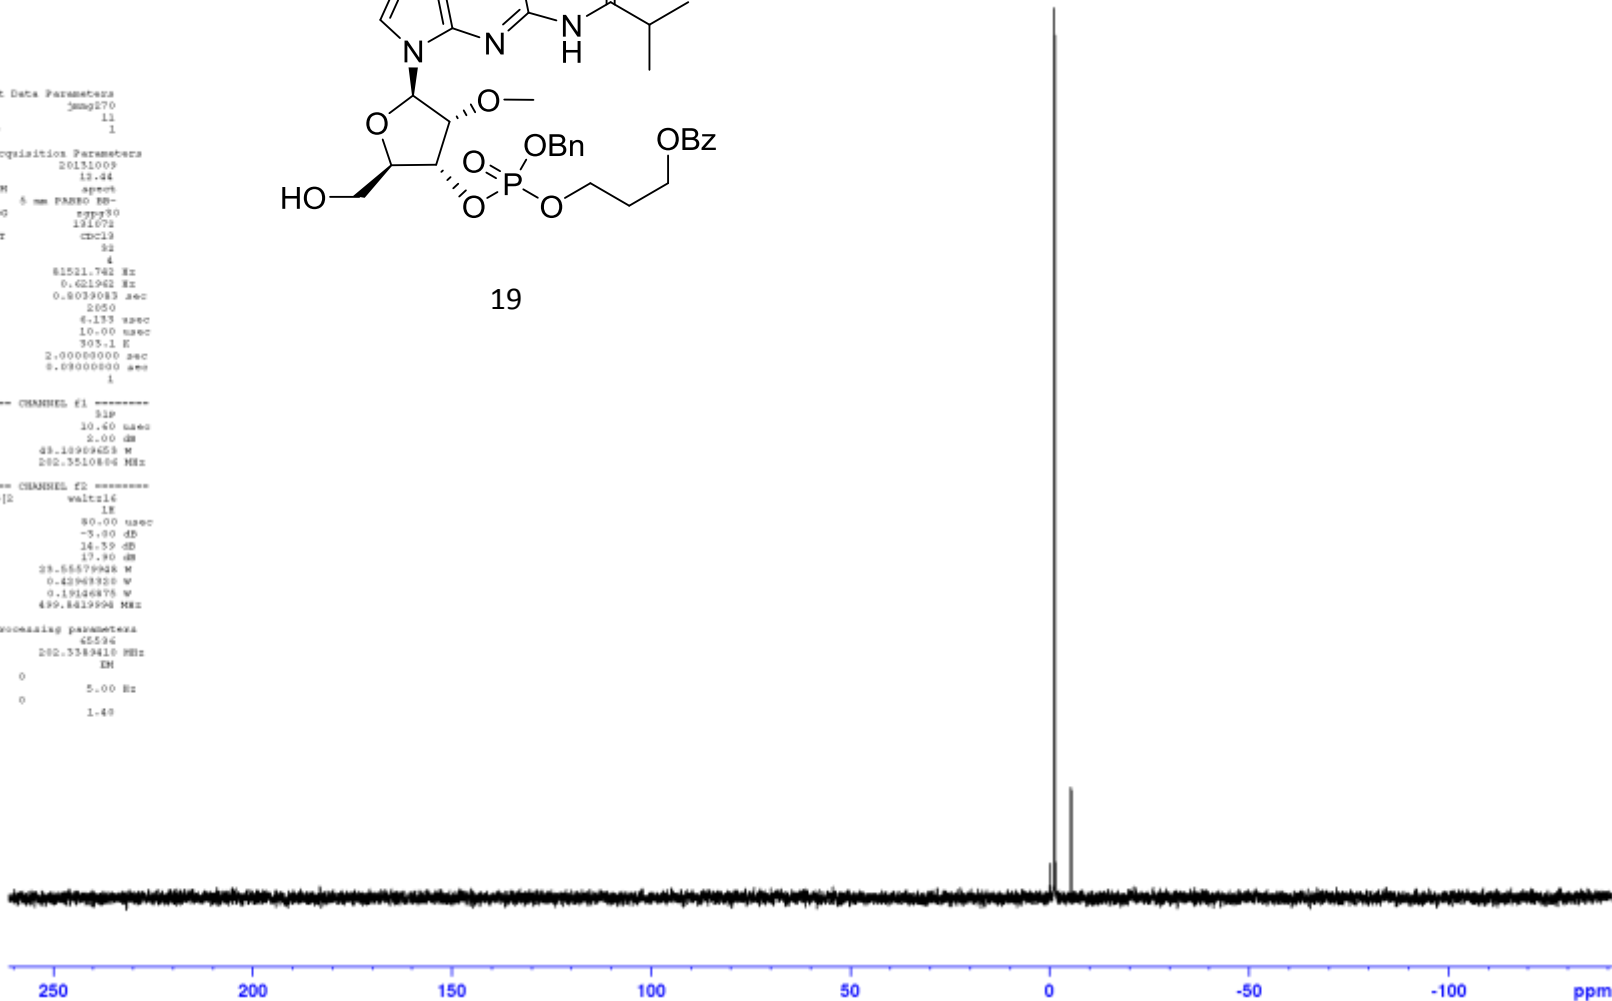

**<sup>31</sup>P NMR  
202 MHz**

CURRENT DATA Parameters  
 NAME 20284  
 EXPNO 11  
 PROCNO 1

F2 - Acquisition Parameters  
 Date\_ 20131105  
 Time 18:21  
 INSTRUM spect  
 PROBRD 5 mm PARBO BR-  
 PULPROG zgpg30  
 ID 131072  
 SOLVENT cdcl3  
 NS 32  
 DS 4  
 SWH 81521.742 Hz  
 FIDRES 0.421962 Hz  
 AQ 0.803483 sec  
 RG 2050  
 DN 6.132 usec  
 DE 6.50 usec  
 TE 303.0 K  
 D1 2.0800000 sec  
 D11 0.0300000 sec  
 TDO 1

----- CHANNEL f1 -----  
 SF01 202.4360954 MHz  
 NUCL 31P  
 P1 18.40 usec  
 PL1 35.50099945 W

----- CHANNEL f2 -----  
 SF02 500.852082 MHz  
 NUC2 1H  
 CPDPRG2 waltz16  
 PCPD2 30.00 usec  
 PLM2 18.35608098 W  
 PLM12 0.35978001 W  
 PLM13 0.23926000 W

F2 - Processing parameters  
 SI 65536  
 SF 202.4239500 MHz  
 NUW EM  
 SR 0  
 LR 3.00 Hz  
 GB 0  
 PC 1.40

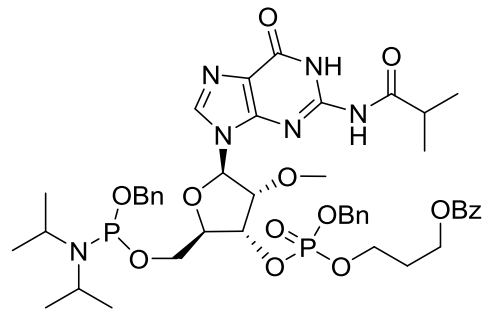

20

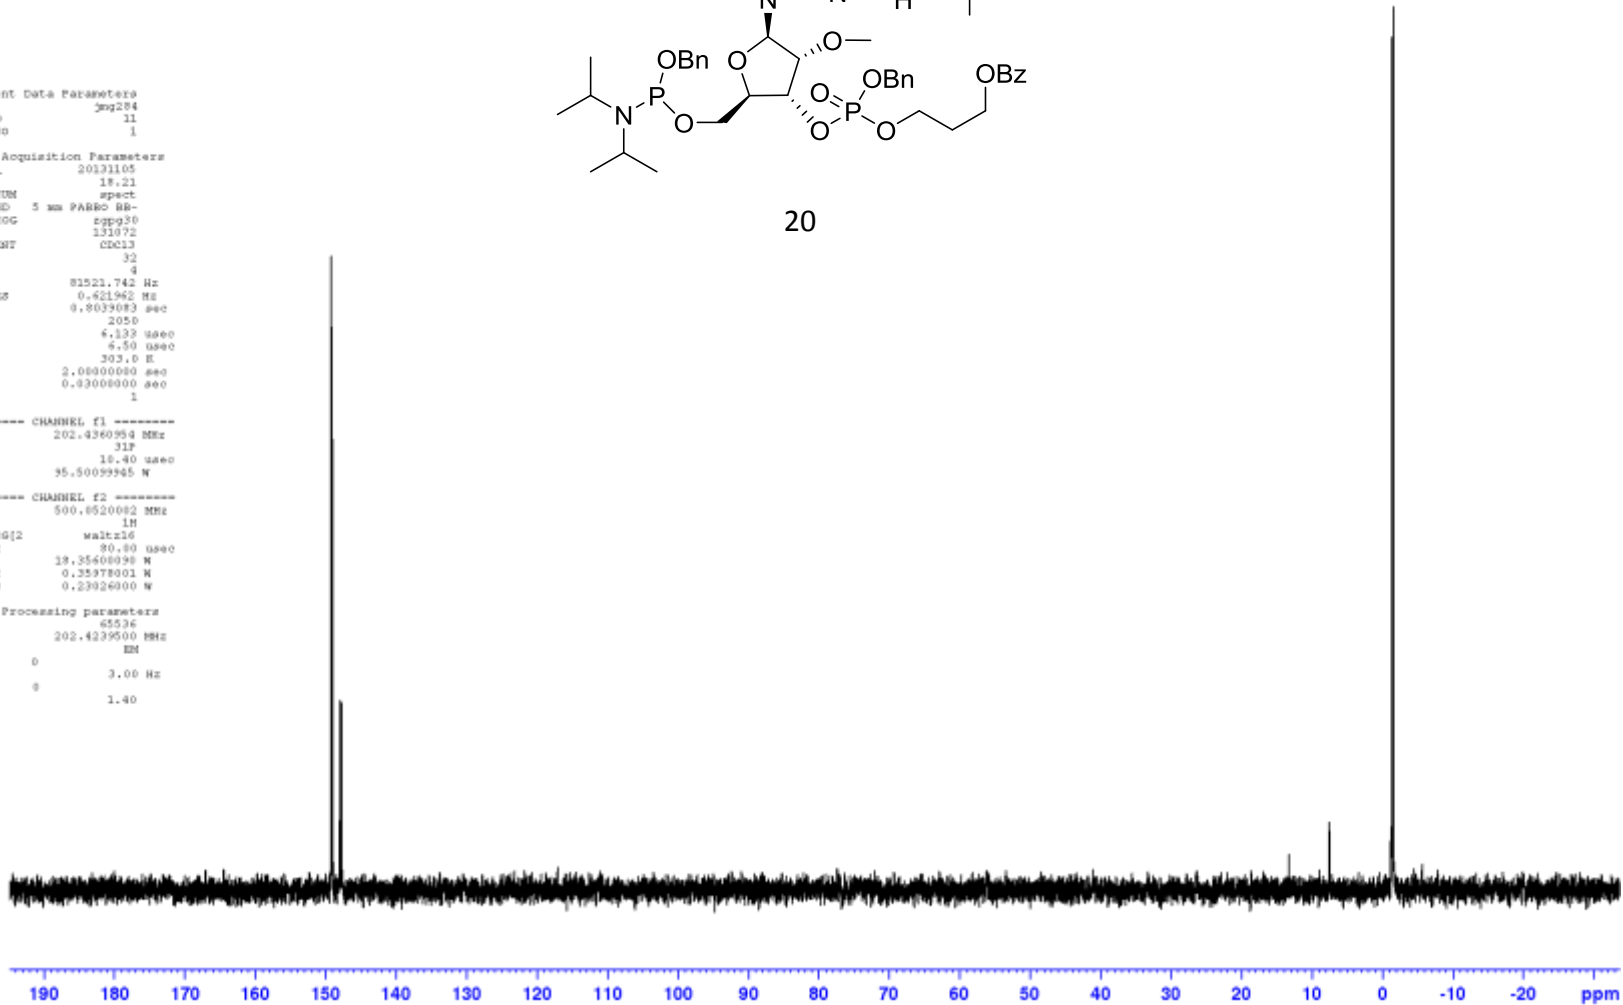



<sup>1</sup>H NMR  
500 MHz

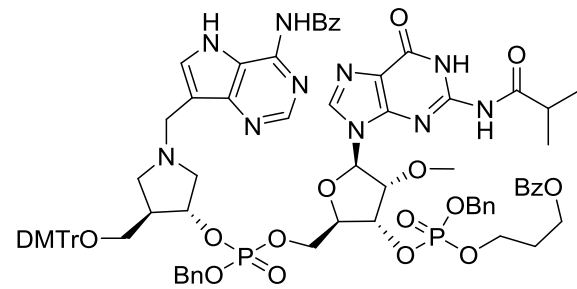

Current Data Parameters  
NAME Jmg285  
EXPNO 10  
PROCNO 1

F2 - Acquisition Parameters  
Date\_ 20121106  
Time 17.21  
INSTRUM spect  
PROBHD 5 mm PABBO BB-  
PULPROG zgpg30  
TD 65536  
SOLVENT CDCl3  
NS 32  
DS 2  
SWH 10302.198 Hz  
FIDRES 0.157199 Hz  
AQ 3.1806805 sec  
RG 381  
CW 48.533 usec  
DE 10.00 usec  
TE 303.2 K  
D1 1.0000000 sec  
TDO 1

----- CHANNEL f1 -----  
NUC1 1H  
P1 18.00 usec  
PL1 -3.00 dB  
PL1W 23.55579943 M  
SFO1 499.8420867 MHz

F2 - Processing parameters  
SI 32768  
SF 499.8400118 MHz  
NRM RM  
SFO 0  
LA 0 0.39 Hz  
GB 0  
PC 1.00

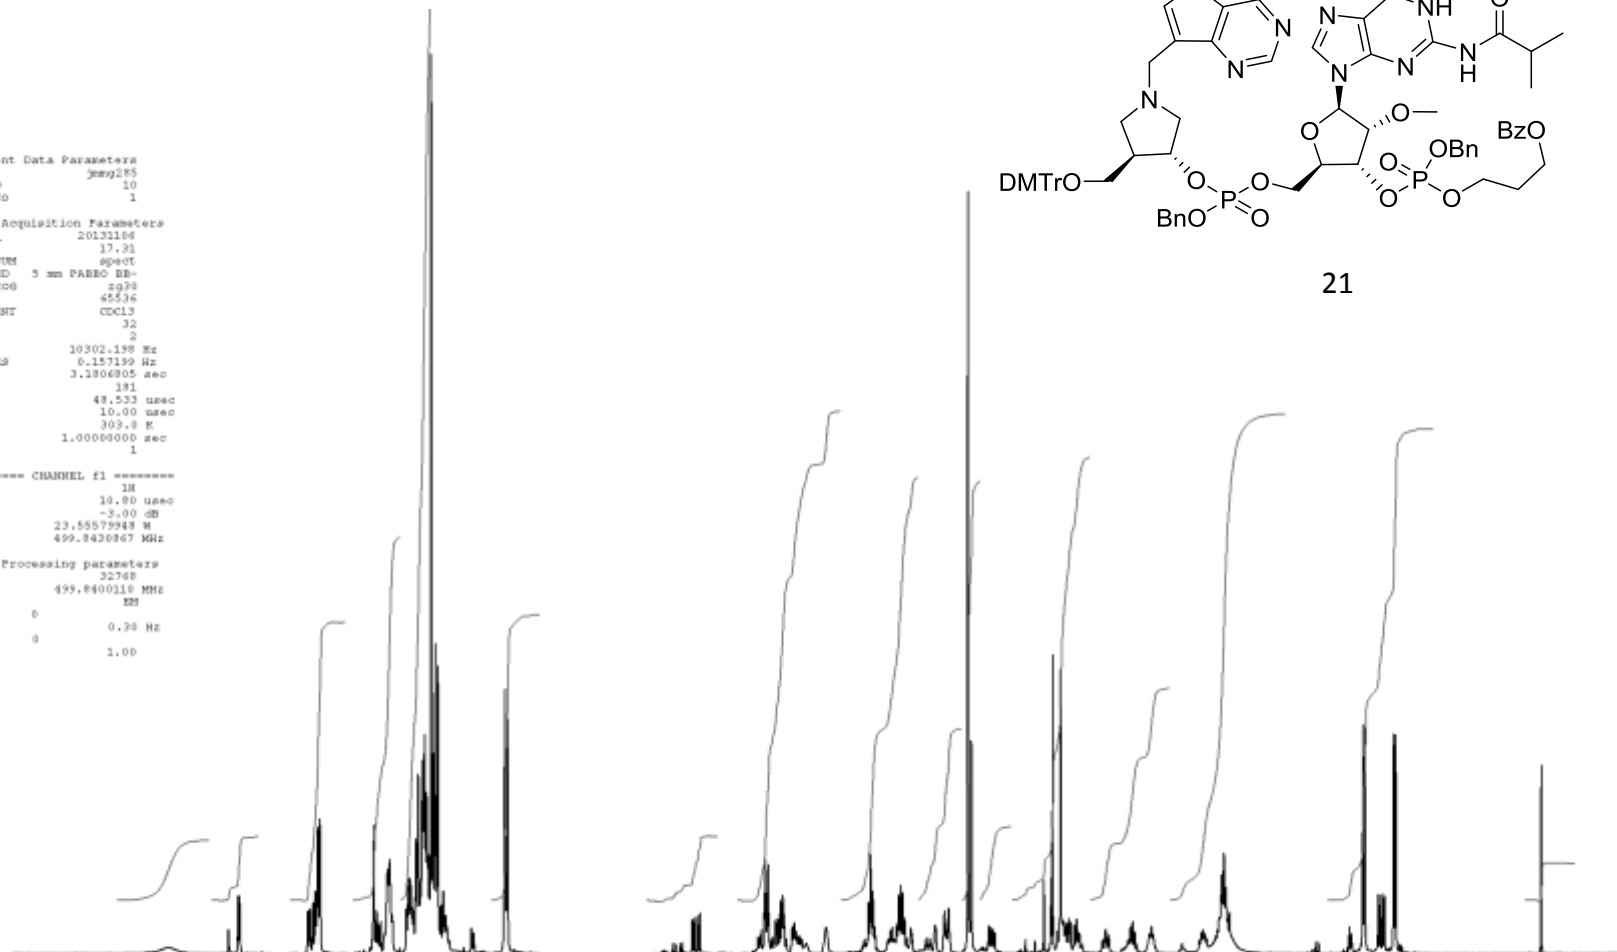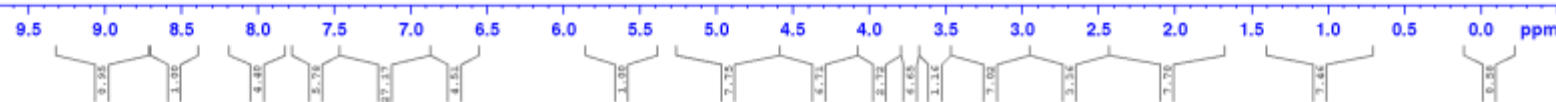

<sup>13</sup>C NMR  
126 MHz

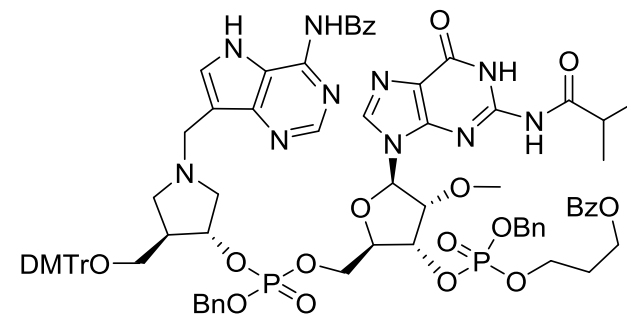

21

```

Current Data Parameters
NAME      Jmgg285
EXPNO    11
PROCNO   1
-----
F2 - Acquisition Parameters
Date_    20131106
Time     17.58
INSTRUM  spect
PROBHD   5 mm PABBO BB-
PULPROG  zgpg30
TD       65536
SOLVENT  cpd13
NS       830
DS       4
SFO      31250.000 MHz
FIDRES   0.476837 Hz
AQ       1.0485760 sec
RG       2050
DW       18.000 usec
DE       10.00 usec
TE       303.0 K
D3       0.58000000 sec
D11      0.09000000 sec
TEO      1
----- CHANNEL f1 -----
NUC1     13C
P1       11.00 usec
P11      9.80 dB
P11W    31.7049027 W
SFO1     125.0984648 MHz
----- CHANNEL f2 -----
CPDPRG2  waltz16
NUC2     1H
PCPD2    80.00 usec
P2       -3.80 dB
P21      14.39 dB
P21W    17.80 dB
P21W    29.65579948 W
P12W    0.43968320 W
P11W    0.19186875 W
SFO2     499.8419994 MHz
-----
F2 - Processing parameters
SI       32768
SF       125.0984648 MHz
MCW      IM
ASB      0
LB       3.00 Hz
GB       0
PC       1.49
  
```

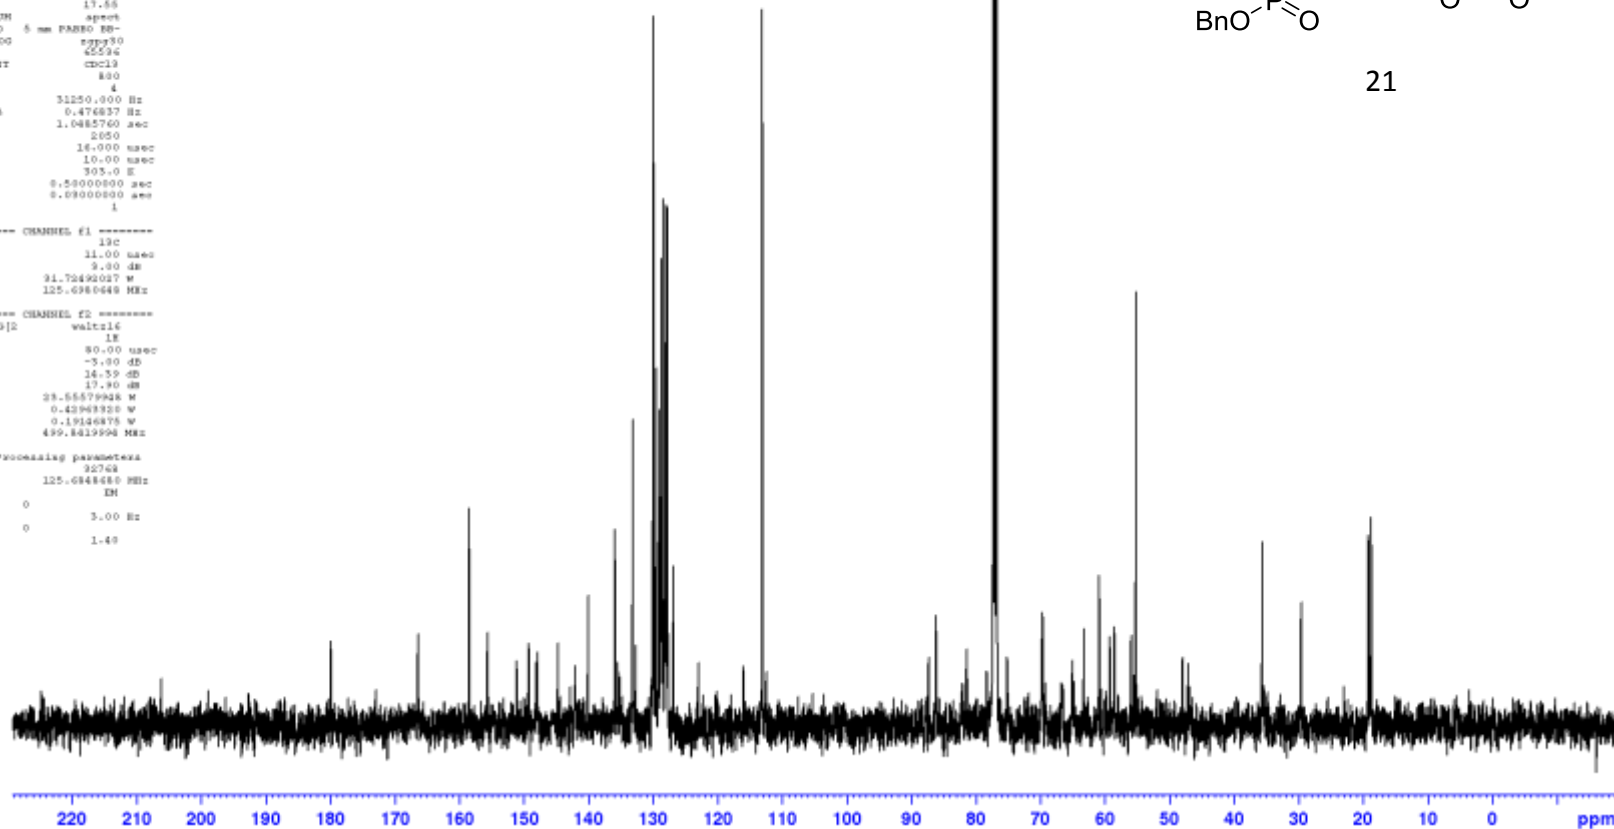

$^{31}\text{P}$  NMR  
202 MHz

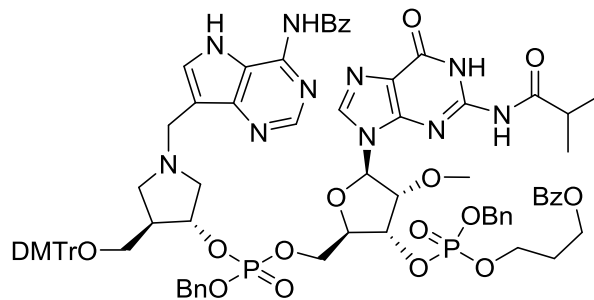

21

```
Current Data Parameters
NAME      mag285
EXPNO    14
PROCNO   1

F2 - Acquisition Parameters
Date_    20131106
Time     18:21
INSTRUM  spect
PROBHD   5 mm PABBO BB-
PULPROG  zgpg30
TD       134072
SOLVENT  cdcl3
NS       32
DS       4
SWH      61521.742 Hz
FIDRES   0.621962 Hz
AQ       0.8039083 sec
RG       2550
DW       6.133 usec
DE       10.00 usec
TE       303.0 K
D3       2.00000000 sec
D11      0.09000000 sec
TEO      1

----- CHANNEL f1 -----
NUC1     31P
P1       10.40 usec
P11      5.00 dB
P11W     43.1896825 W
SFO1     202.3510846 MHz

***** CHANNEL f2 *****
CHOPPRG2 waltz16
NUC2     1H
PCPD2    80.00 usec
P12      -3.00 dB
P112     14.39 dB
P113     17.80 dB
P12W     29.65579928 W
P112W    0.43968320 W
P113W    0.19166875 W
SFO2     499.8419994 MHz

F2 - Processing parameters
SI       65536
SF       202.3389410 MHz
MEM      1M
SAB      0
LB       5.00 Hz
GB       0
PC       1.49
```

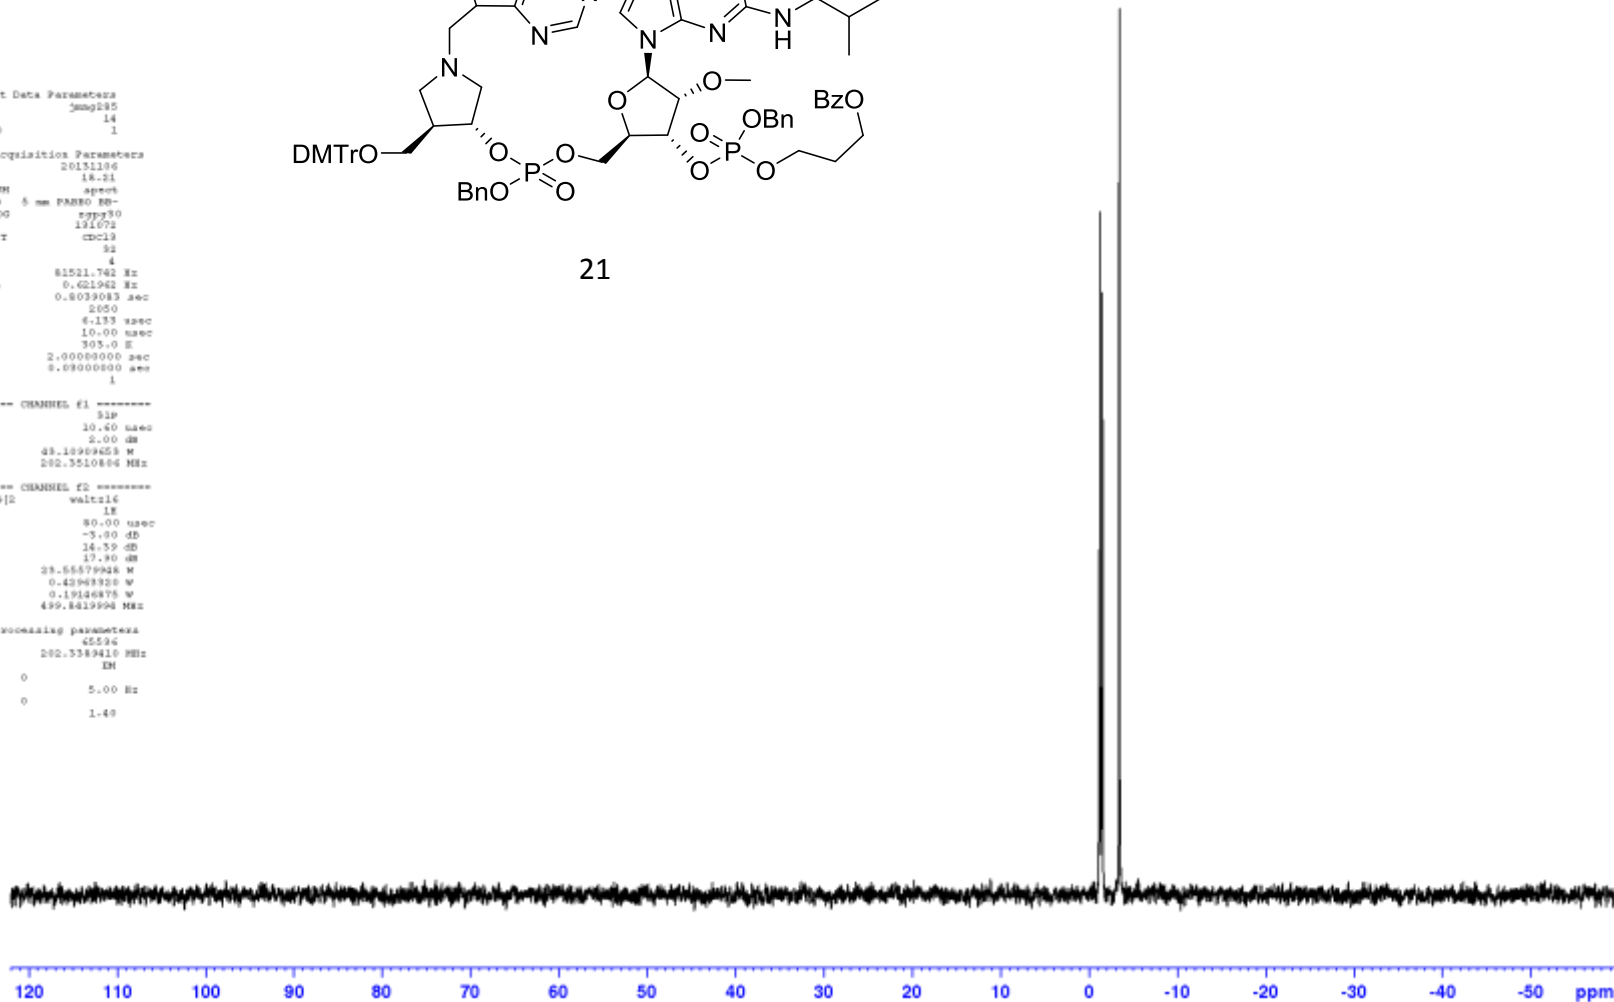

<sup>1</sup>H NMR  
500 MHz

Current Data Parameters  
NAME jmg284  
EXPNO 10  
PROCNO 1

F2 - Acquisition Parameters  
Date\_ 20131107  
Time 11:42  
INSTRUM spect  
PROBHD 5 mm PABBO BB-  
PULPROG zgpg30  
TD 45536  
SOLVENT CDCl3  
NS 32  
DS 2  
SWH 10302.198 Hz  
FIDRES 0.157199 Hz  
AQ 3.1804805 sec  
RG 454  
CW 48.533 usec  
DE 10.00 usec  
TE 303.2 K  
D1 1.0000000 sec  
TDO 1

----- CHANNEL f1 -----  
NUC1 1H  
P1 18.00 usec  
PL1 -3.00 dB  
PL1W 23.55579943 M  
RFOL 499.8420867 MHz

F2 - Processing parameters  
SI 32768  
SF 499.8400109 MHz  
NMW MHz  
SSB 0  
LA 0 0.39 Hz  
GB 0  
PC 1.00

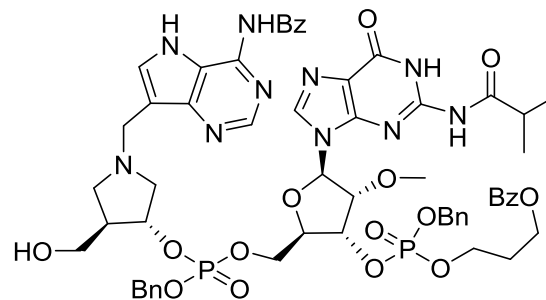

22

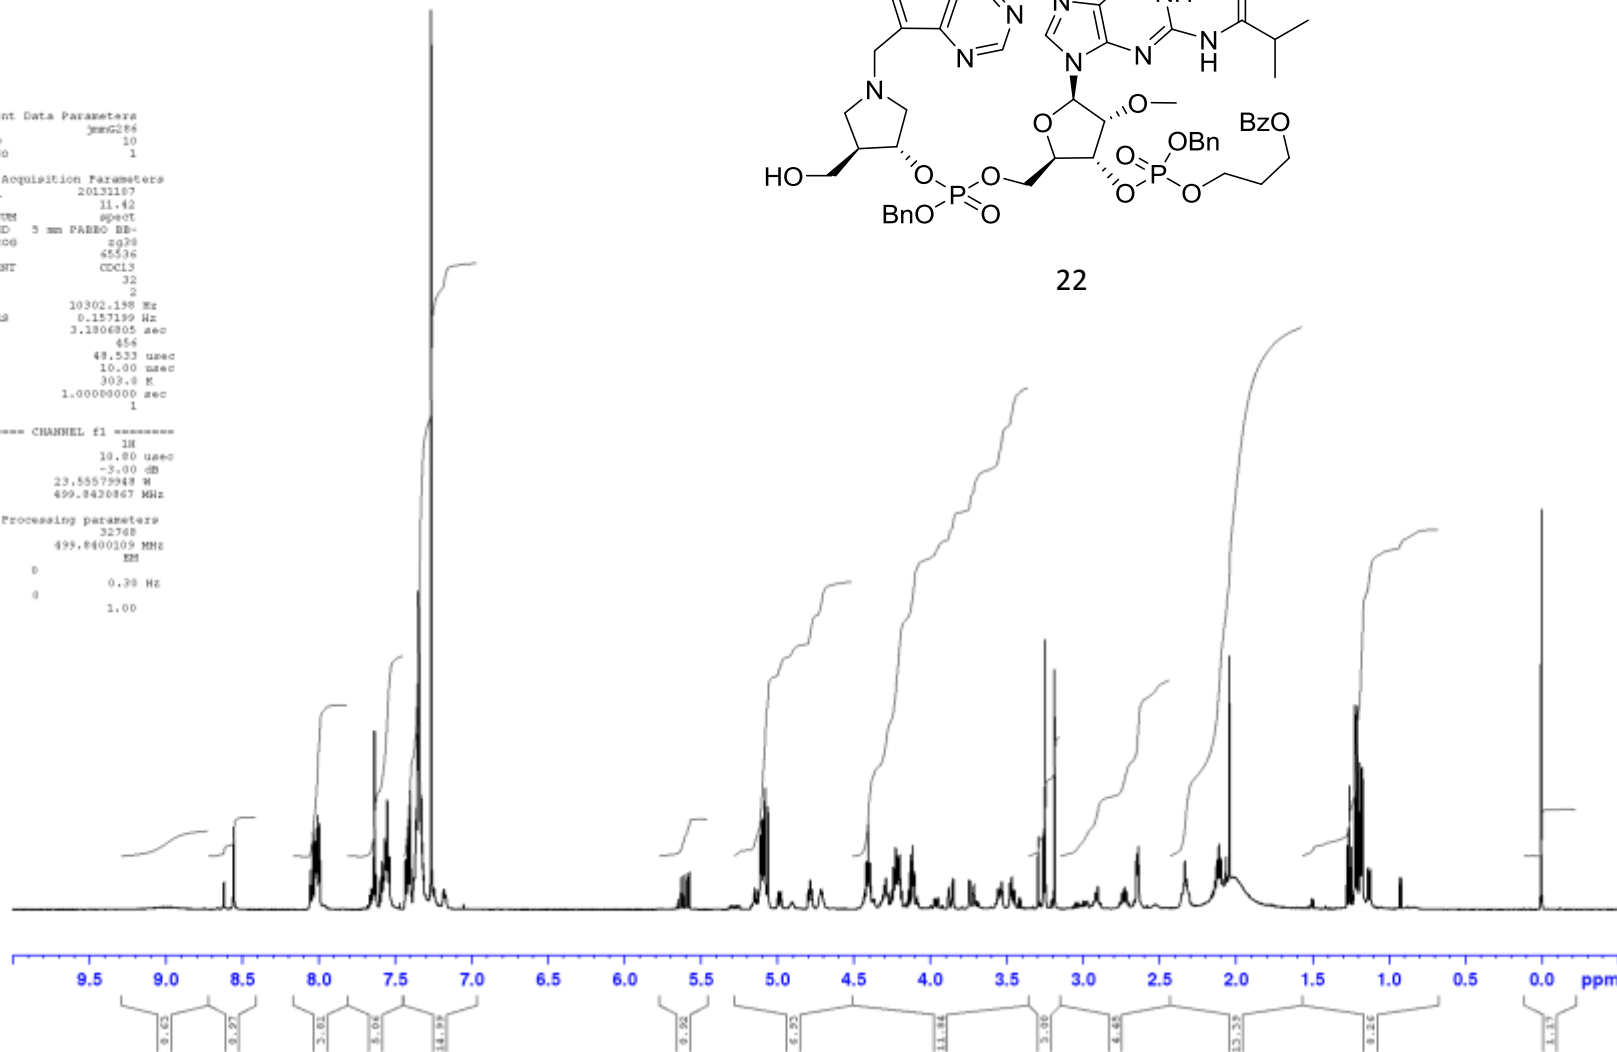

**<sup>13</sup>C NMR  
126 MHz**

```

Current Data Parameters
NAME      jsm028c
EXPNO    21
PROCNO   1

F2 - Acquisition Parameters
Date_    20131107
Time     13.28
INSTRUM  spect
PROBHD   5 mm PABBO BB-
PULPROG  zgpg30
TD       65536
SOLVENT  cpd13
NS       830
DS       4
SWH      31250.000 Hz
FIDRES  0.476837 Hz
AQ       1.0485760 sec
RG       2050
DW       18.000 usec
DE       10.000 usec
TE       303.0 K
D3       0.58000000 sec
D11      0.09000000 sec
TEO      1

----- CHANNEL f1 -----
NUC1     13c
P1       11.00 usec
P11      9.00 dB
P11M     21.7049027 W
SFO1     125.0984648 MHz

***** CHANNEL f2 *****
CPDPRG2  waltz16
NUC2     1H
PCPD2    80.00 usec
P2       -3.00 dB
P21      14.39 dB
P21M     17.90 dB
P21M     29.65579928 W
P112M    0.43968320 W
P112M    0.19186875 W
SFO2     499.8419994 MHz

F2 - Processing parameters
SI       32768
SF       125.0984648 MHz
MCW      IM
ASD      0
LB       3.00 Hz
GB       0
PC       1.49
  
```

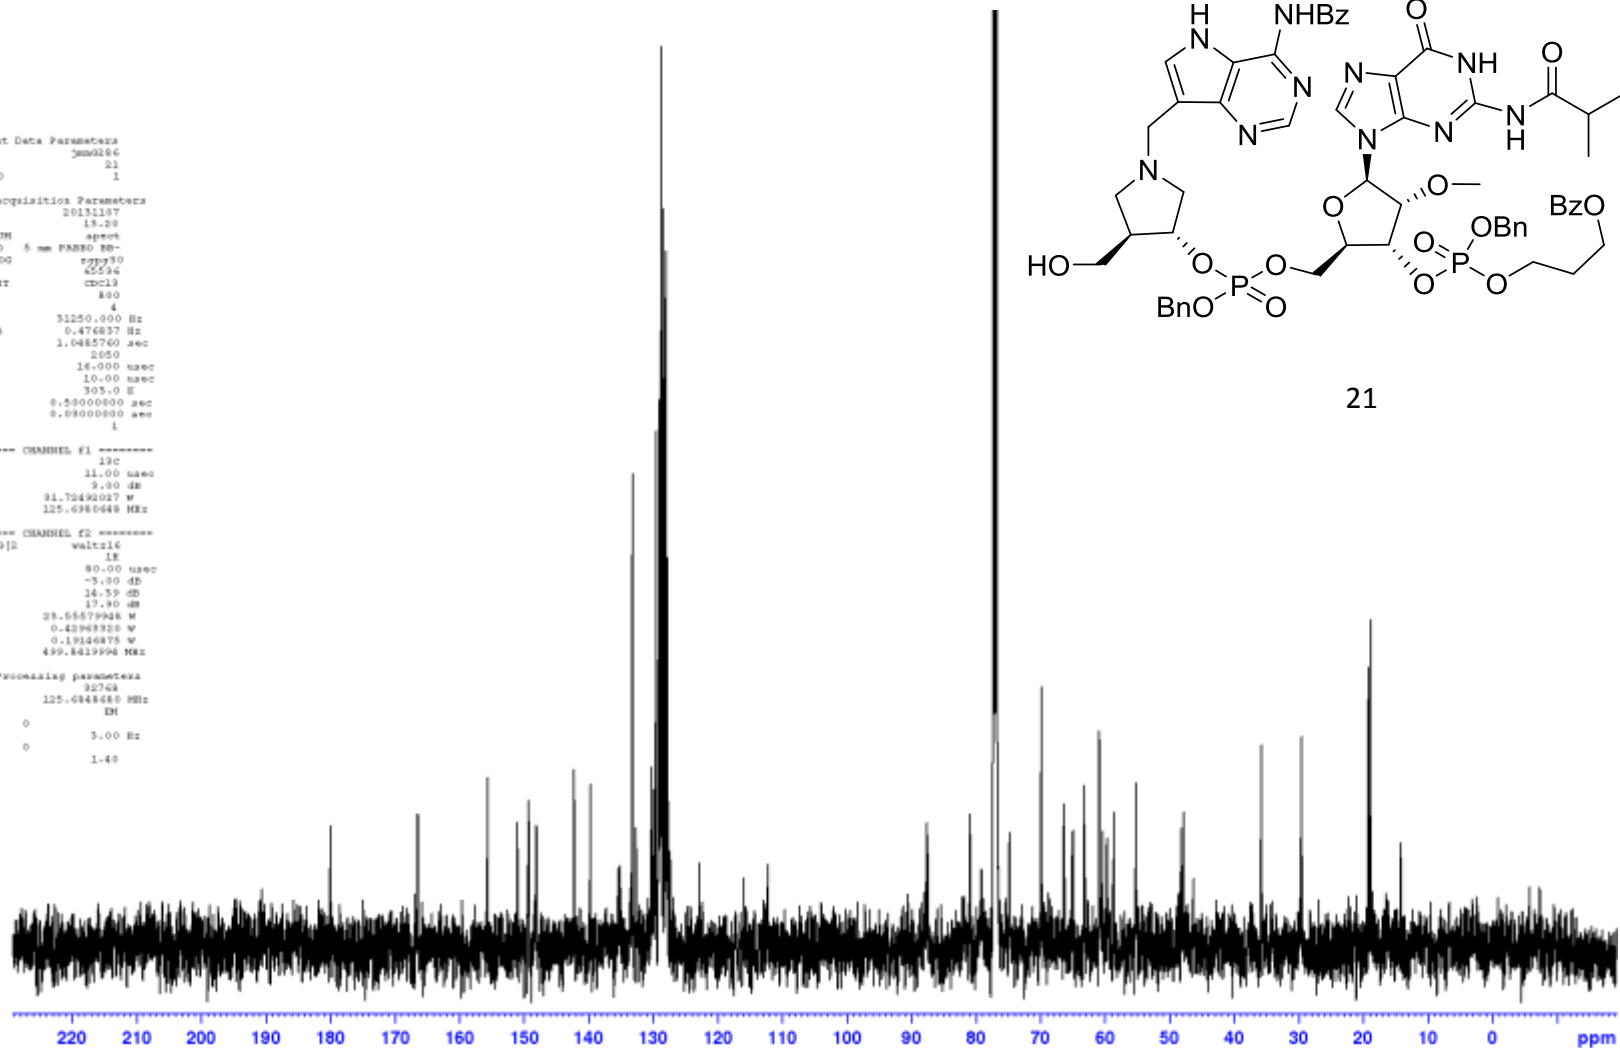

**<sup>31</sup>P NMR  
202 MHz**

```

Current Data Parameters
NAME      jmm028c
EXPNO    26
PROCNO   1

F2 - Acquisition Parameters
Date_    20131107
Time     14:30
INSTRUM  spect
PROBHD   5 mm PABBO BB-
PULPROG  zgpg30
TD       131072
SOLVENT  cdcl3
NS       32
DS       4
SFO      61521.742 Hz
FIDRES   0.621962 Hz
AQ       0.8039083 sec
RG       2550
DW       6.133 usec
DE       10.00 usec
TE       303.1 K
D3       2.0000000 sec
D11      0.0900000 sec
TEO      1
  
```

```

----- CHANNEL F1 -----
NUC1     31P
P1       10.40 usec
P11      5.00 dB
P11W     43.18969458 W
SFO1     202.3510846 MHz
  
```

```

***** CHANNEL F2 *****
CPCPFGP2 waltz16
NUC2     1H
PCPD2    80.00 usec
P12      -5.80 dB
P12W     14.39 dB
P113     17.80 dB
P13W     29.65579948 W
P113M    0.43968320 W
P113W    0.19166875 W
SFO2     499.8419994 MHz
  
```

```

F2 - Processing parameters
SI       65536
SF       202.3519410 MHz
MCM      IM
SAB      0
LB       5.00 Hz
GB       0
PC       1.40
  
```

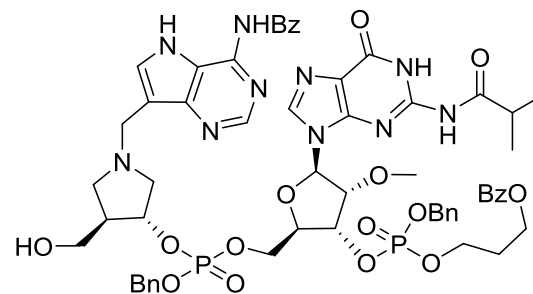

22

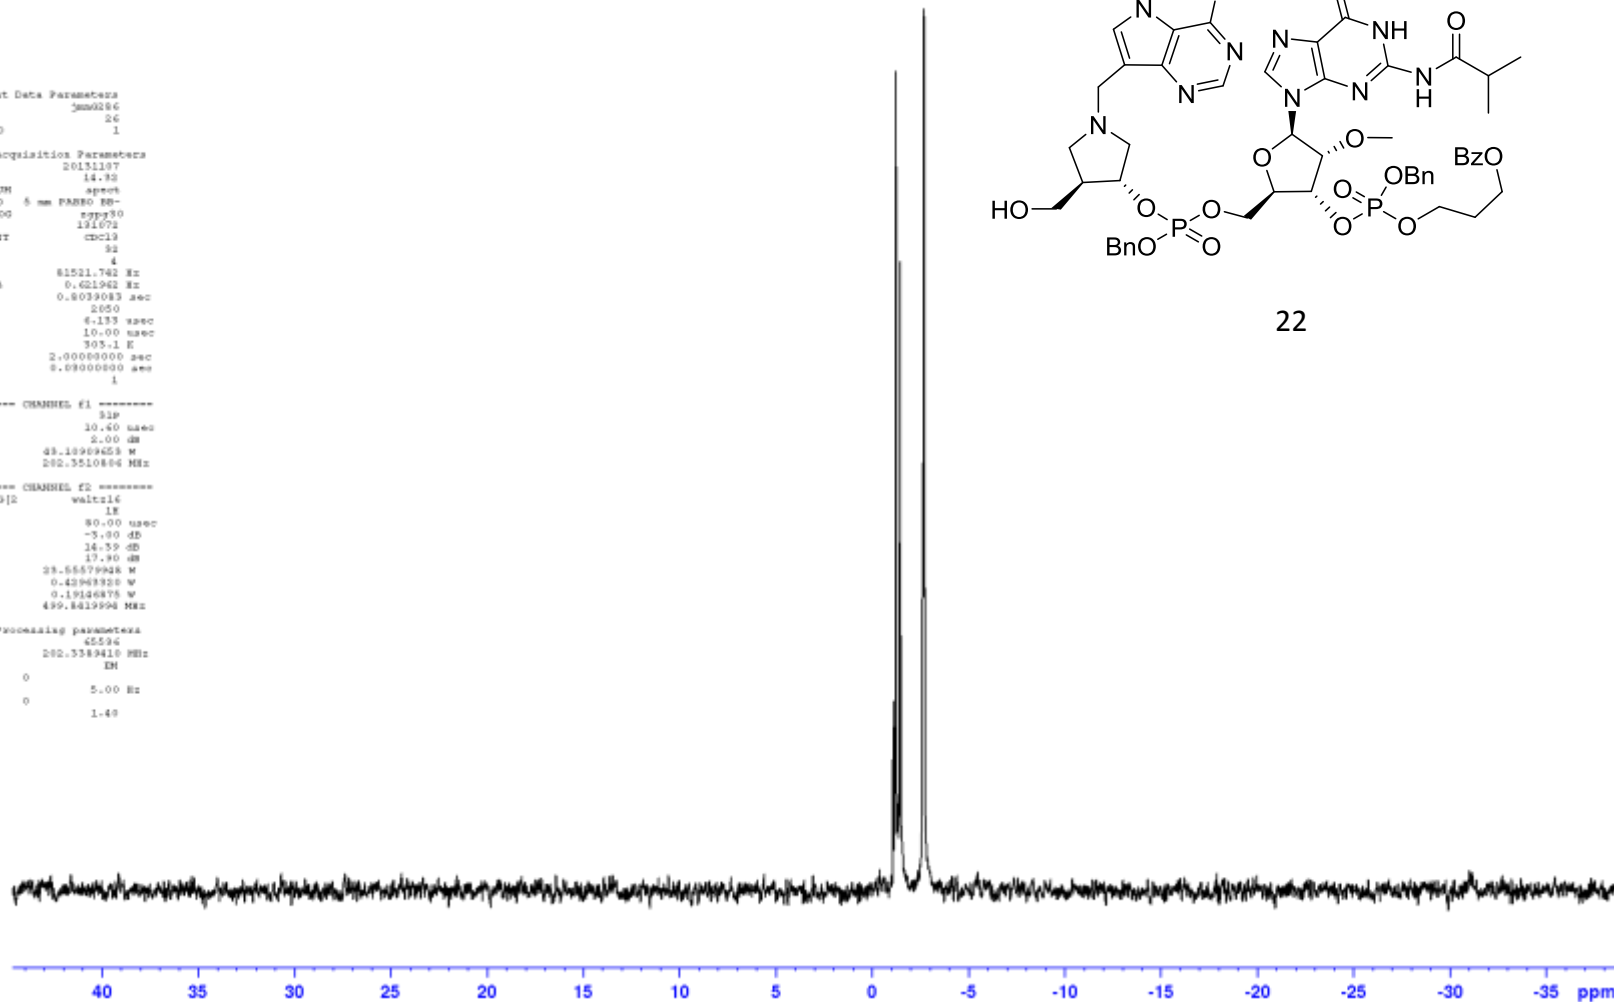

<sup>1</sup>H NMR  
500 MHz

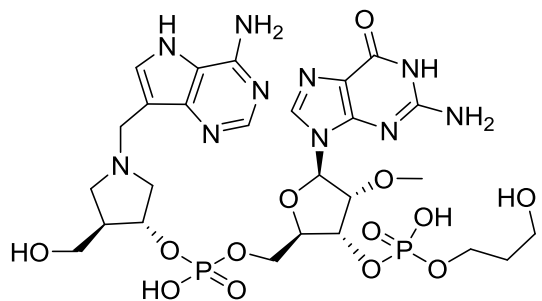

23

Current Data Parameters  
NAME gb12102a  
EXPNO 10  
PROCNO 1

F2 - Acquisition Parameters  
Date\_ 20120909  
Time 17.24  
INSTRUM spect  
PROBHD 5 mm PABBO BA-  
PULPROG zg30  
ID 65536  
SOLVENT D2O  
NS 32  
DS 2  
SWH 10302.138 Hz  
FIDRES 0.157199 Hz  
AQ 3.1804805 sec  
RG 283  
DN 48.533 usec  
DE 18.00 usec  
TE 303.0 K  
D1 1.0000000 sec  
TD0 1

===== CHANNEL f1 =====  
NUC1 1H  
P1 10.00 usec  
P11 -3.00 dB  
PL1 23.55579948 W  
SFO1 499.8430867 MHz

F2 - Processing parameters  
SI 32768  
SF 499.8399582 MHz  
NUC RM  
SSB 0  
LB 0.30 Hz  
GB 0  
PC 1.00

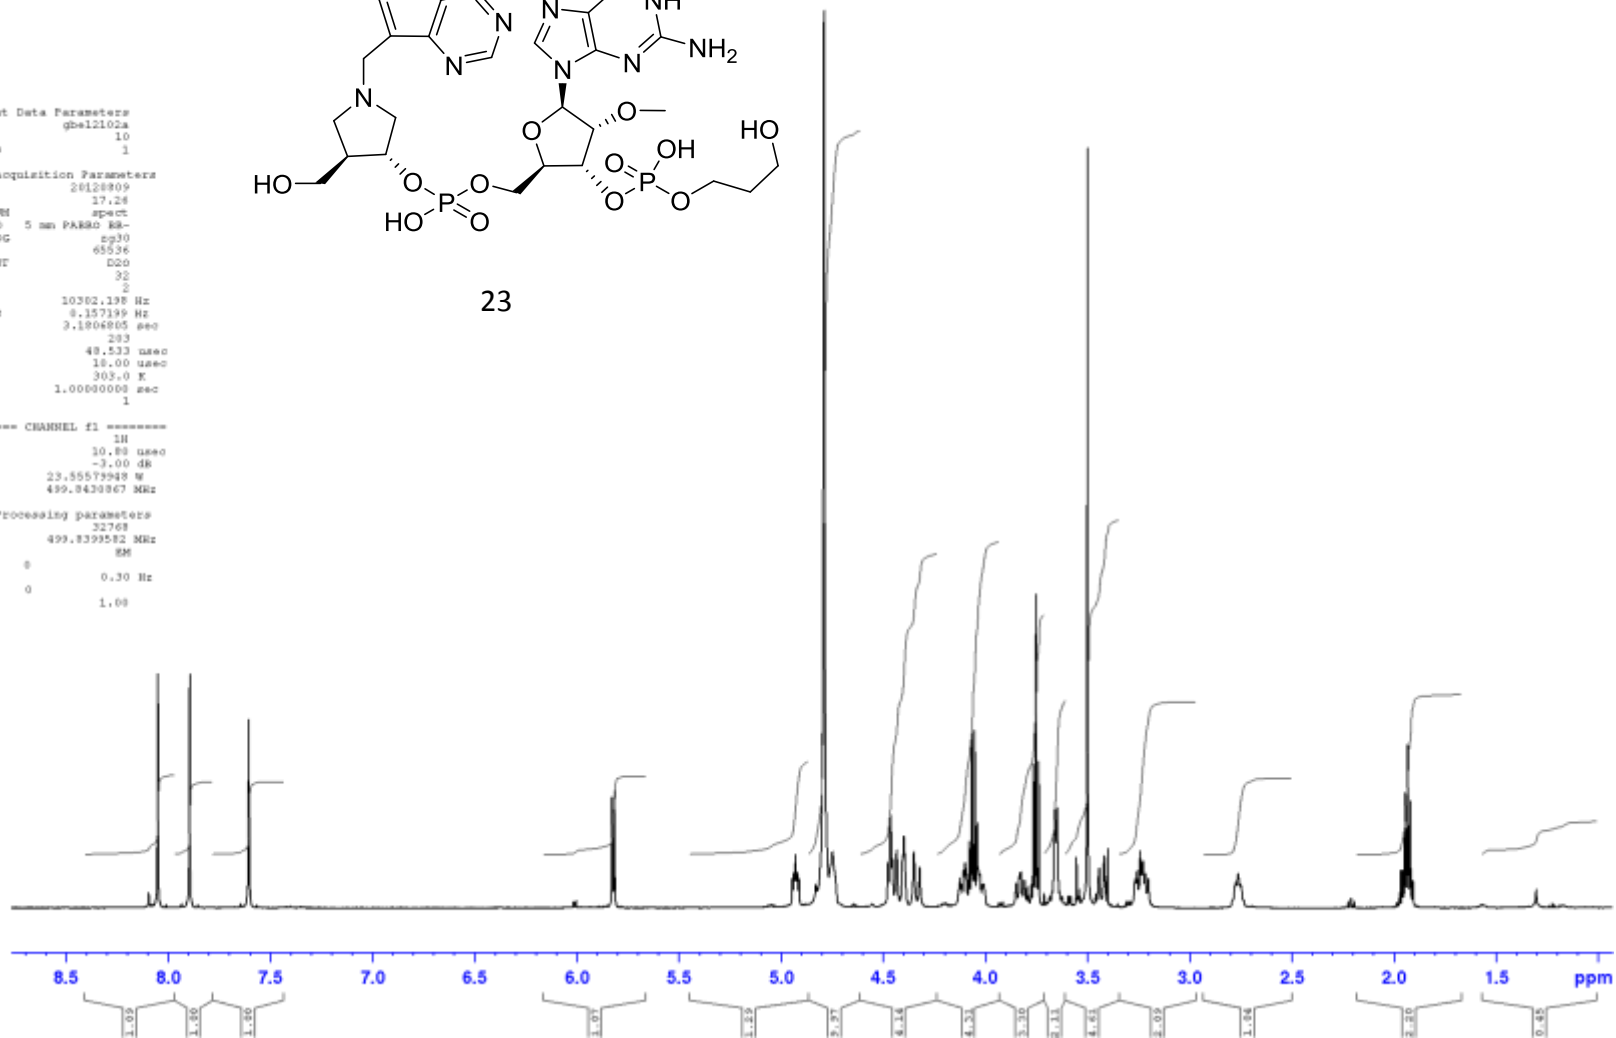

<sup>13</sup>C NMR  
126 MHz

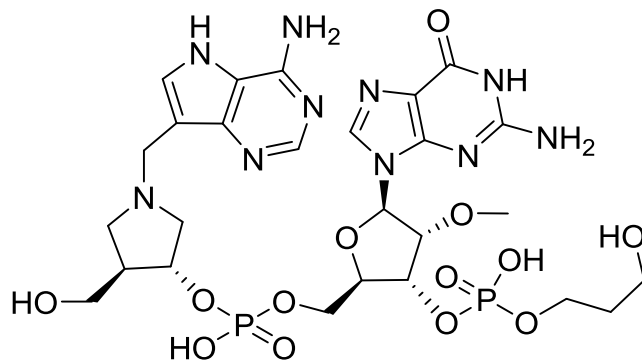

23

```

Current Data Parameters
NAME      gbal2102a
EXPNO    11
PROCNO   1

F2 - Acquisition Parameters
Date_    20120609
Time     17.34
INSTRUM  spect
PROBHD   5 mm PABBO BB-
PULPROG  zgpg30
TD       65536
SOLVENT  d2o
NS       2048
DS       4
SWH      31250.000 Hz
FIDRES  0.476837 Hz
AQ       1.0485760 sec
RG       2050
DW       18.000 usec
DE       10.000 usec
TE       303.0 K
D3       8.58000000 sec
D11      8.09000000 sec
TEO      1

----- CHANNEL f1 -----
NUC1     13C
P1       11.00 usec
P11      9.80 dB
P11W    31.7049027 W
SFO1     125.0984648 MHz

***** CHANNEL f2 *****
CPDPRG2  waltz16
NUC2     1H
PCPD2    80.00 usec
P2       -3.80 dB
P21      14.39 dB
P21W    17.80 dB
P23W    29.65579948 W
P12W    0.43968320 W
P13W    0.19186878 W
SFO2     499.8419994 MHz

F2 - Processing parameters
SI       32768
SF       125.0984648 MHz
MCM      EM
ASB      0
LB       5.00 Hz
GB       0
PC       1.49
  
```

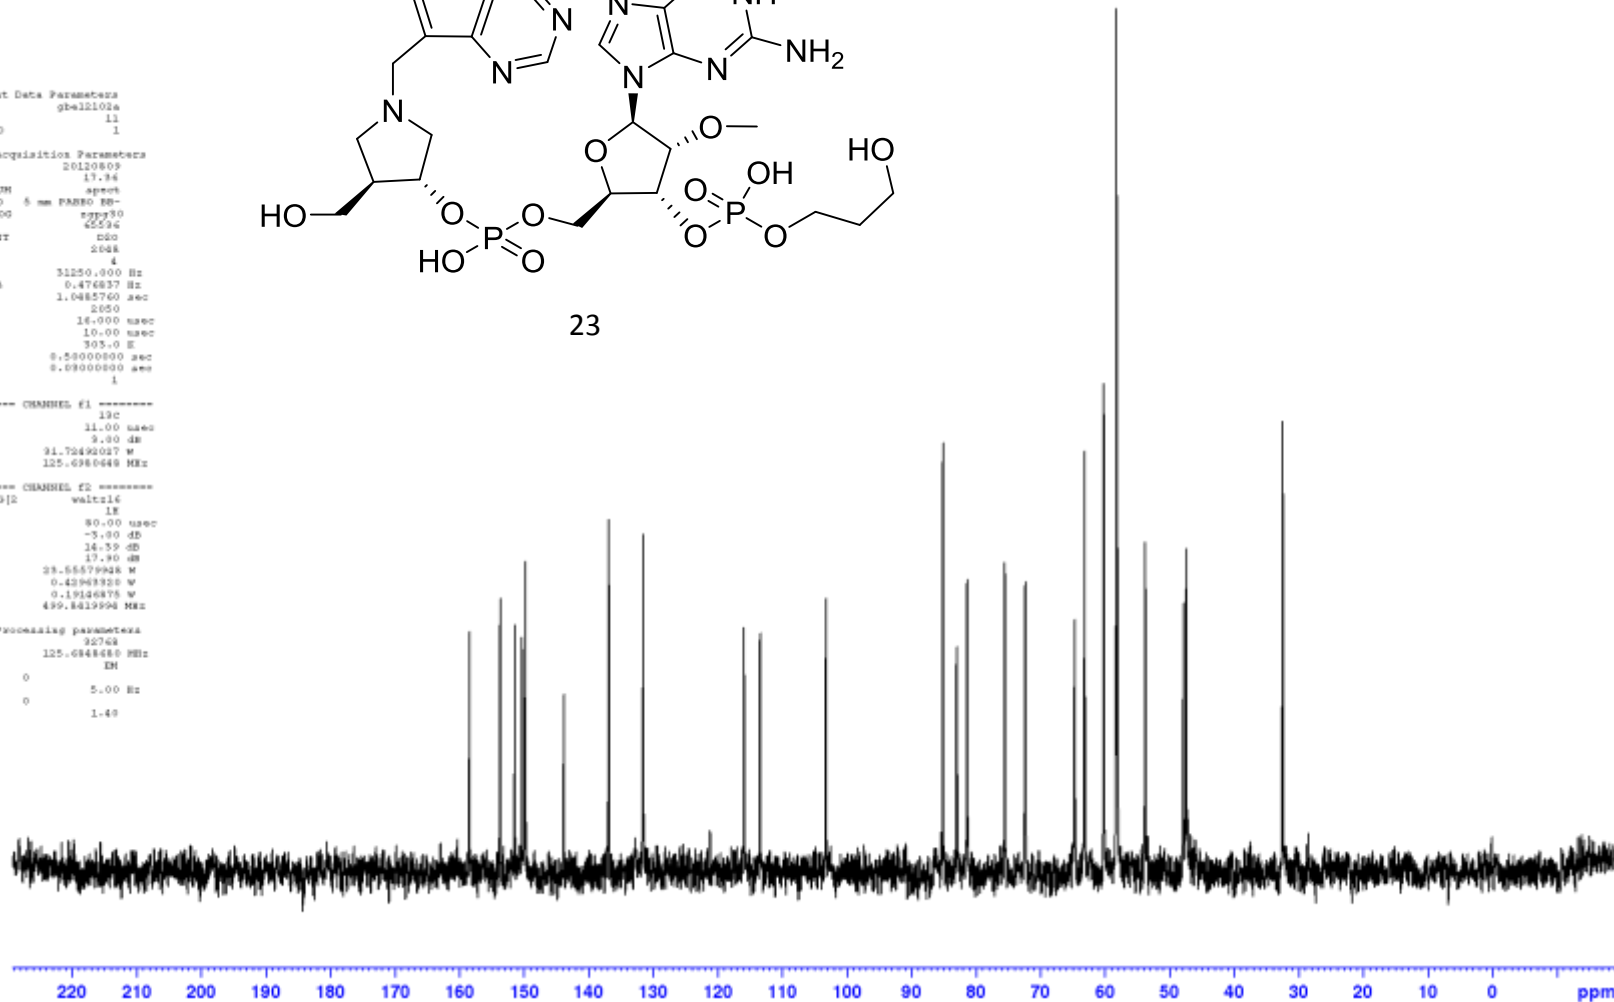



**<sup>31</sup>P NMR  
202 MHz**

```
Current Data Parameters
NAME          g812-102a
EXPNO        11
PROCNO       1

F2 - Acquisition Parameters
Date_        20120909
Time         12.08
INSTRUM      spect
PROBHD       5 mm PABBO BB-
PULPROG      zgpg30
TD           131072
SOLVENT      D2O
RG           320
DS           4
SWH          81921.742 Hz
FIDRES      0.621962 Hz
AQ          0.8039083 sec
RG          2058
DW          6.123 usec
DE          6.50 usec
TE          299.2 K
D1          3.80000000 sec
d11         0.03000000 sec
TE0         1

===== CHANNEL f1 =====
NUC1         31P
P1          18.40 usec
P11         -1.00 dB
P1LM       55.50078523 W
SFO1        202.4340954 MHz

===== CHANNEL f2 =====
CHOPPRG2    mltic16
NUC2         1H
PCPD2       80.80 usec
P12         1.00 dB
P1L2        19.08 dB
P1L3        21.10 dB
P1LM       18.35641289 W
P1L2M      0.35907363 W
P1L3M      0.17948569 W
SFO2        500.0520082 MHz

F2 - Processing parameters
SI          65536
SF          202.4239500 MHz
NCM         324
ZSN         0
LB          3.00 Hz
GB          0
PC          1.40
```

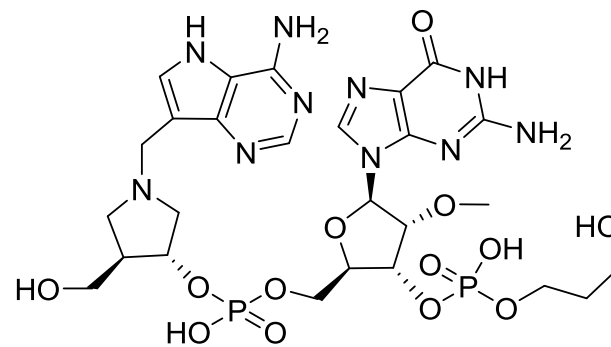

23

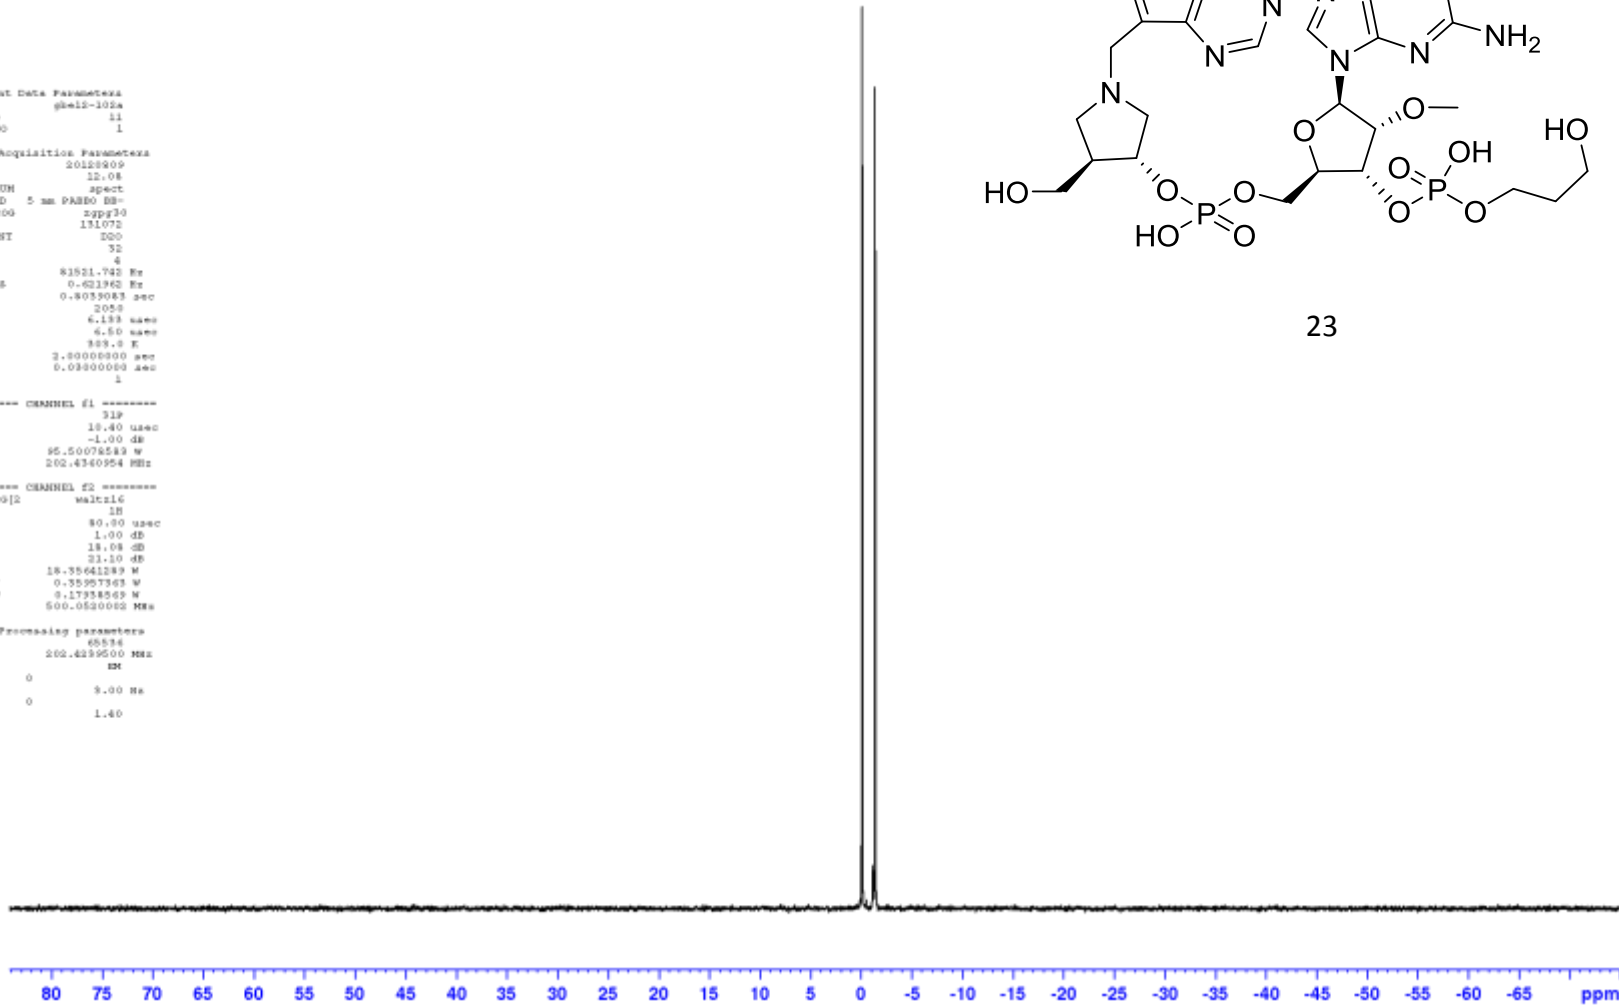

**<sup>1</sup>H NMR  
500 MHz**

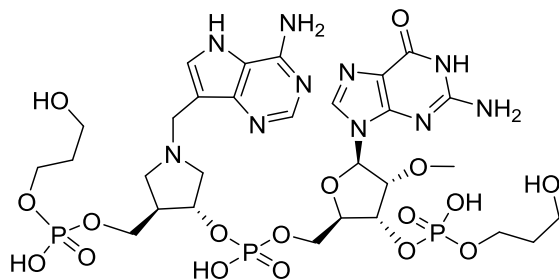

2

Current Data Parameters  
NAME jmmgbel2114  
EXPNO 10  
PROCNO 1

F2 - Acquisition Parameters  
Date\_ 20131205  
Time 13.53  
INSTRUM spect  
PROBHD 5 mm PABBO BB-  
PULPROG zg30  
TD 65536  
SOLVENT d2o  
NS 32  
DS 2  
SWH 10330.578 Hz  
FIDRES 0.157632 Hz  
AQ 3.1719425 sec  
RG 128  
DW 48.400 usec  
DE 6.50 usec  
TE 303.0 K  
D1 1.0000000 sec  
TDO 1

===== CHANNEL f1 =====  
SFO1 500.0530880 MHz  
NUC1 1H  
P1 11.20 usec  
PLWL 18.35600090 W

F2 - Processing parameters  
SI 32768  
SF 500.0499563 MHz  
WDW EM  
SSB 0  
LB 0.30 Hz  
GB 0  
PC 1.00

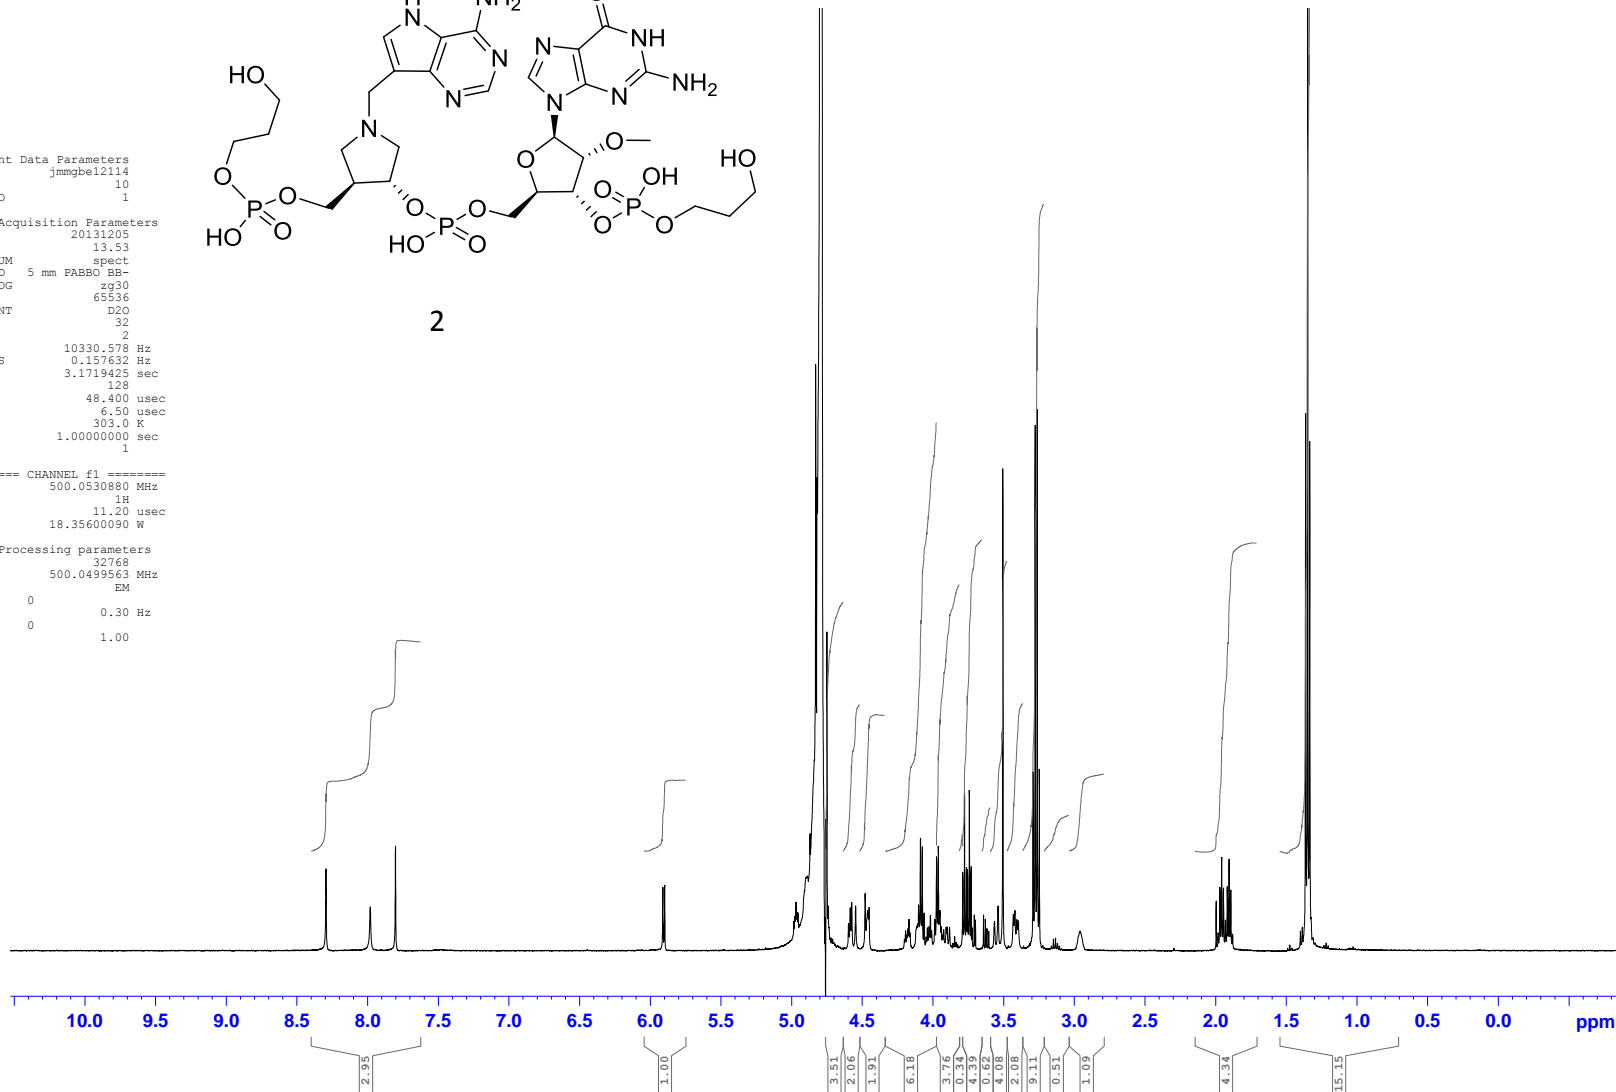

**<sup>13</sup>C NMR  
126 MHz**

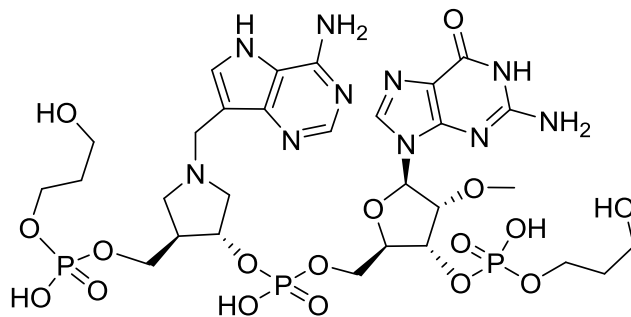

2

```
Current Data Parameters
NAME          gb412-114b
EXPNO         21
PROCNO        1

F2 - Acquisition Parameters
Date_         20120831
Time          3.54
INSTRUM       spect
PROBHD        5 mm PABBO BB-
PULPROG       zgpg30
TD            65536
SOLVENT       D2O
NS            4080
DS            4
SWH           31250.000 Hz
FIDRES       0.476837 Hz
AQ           1.0485760 sec
RG           203
DW           16.000 usec
DE           15.08 usec
TE           303.0 K
D3           8.15000001 sec
D11          8.09000000 sec
TEO          1
```

```
----- CHANNEL f1 -----
NUC1          13C
P1            9.00 usec
P11          -1.00 dB
P1LW        125.9428884 W
SFO1         125.7508755 MHz
```

```
----- CHANNEL f2 -----
CPOBPRG1     waltz16
NUC2          1H
PCPD2        80.00 usec
P12          1.00 dB
P1L2        19.98 dB
P1L3        21.10 dB
P13W        18.95441289 W
P1L3W       0.35867363 W
P1L3W       0.17983689 W
SFO2         500.0520002 MHz
```

```
F2 - Processing parameters
SI           32768
SF           125.7376730 MHz
RG           64
WDW          EM
SSB          0
LB           3.00 Hz
GB           0
PC           1.49
```

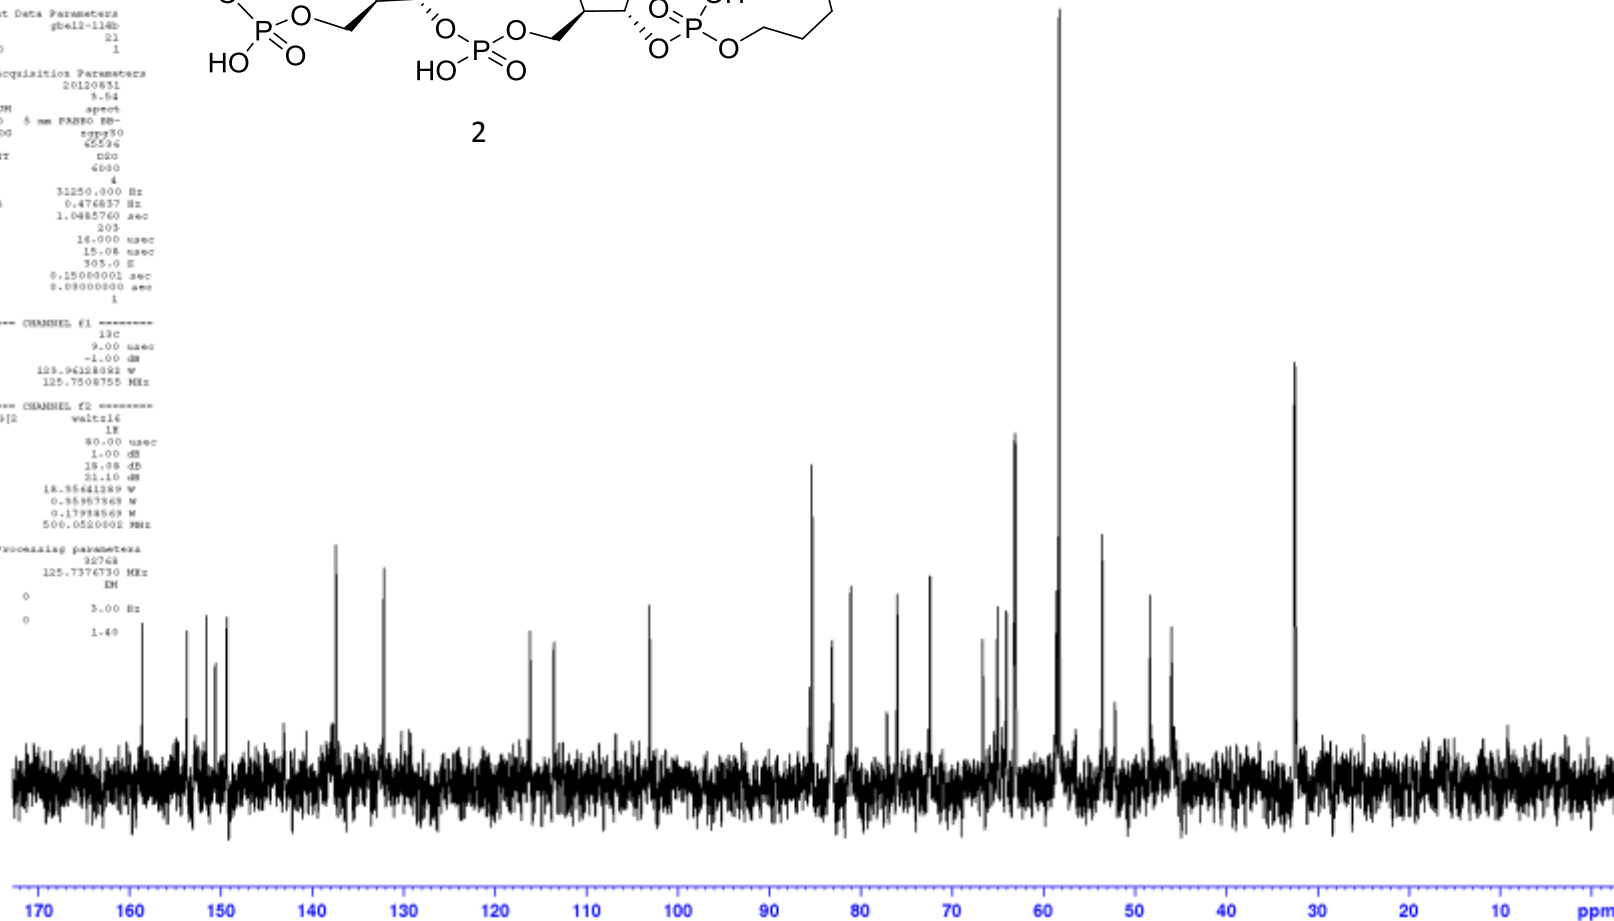

31P NMR  
202 MHz

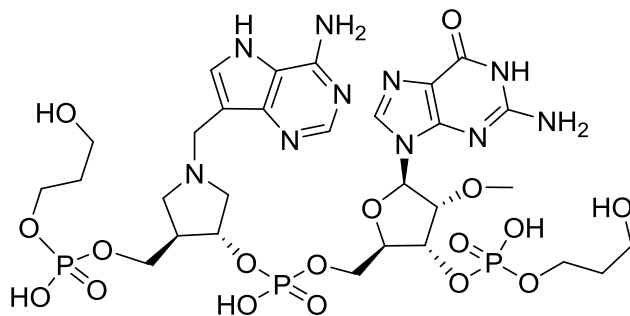

2

```

=====
CURVED DATA PARAMETERS
NAME          gsh12-112b
EXPNO        11
PROCNO       1
=====
F2 - Acquisition Parameters
Date_        20120810
Time         23.20
INSTRUM      spect
PROBHD      5 mm PNMQ 2H-
PULPROG      zgpg30
TD           262072
AQ          100
RG           512
DS           4
SFO         125.760 MHz
FIDRES      0.421963 Hz
AQ          0.4832093 sec
RG          2050
DM          6.230 mm
DC          6.80 mm
TE          303.0 K
D1          2.0080000 sec
D11         0.0300000 sec
TD0         1
=====
===== CHANNEL f1 =====
NUC1         31P
P1          10.00 usec
PL1         -1.00 dB
PL1W        95.50074843 W
SFO1        202.4234500 MHz
=====
===== CHANNEL f2 =====
CPDPRG2     waltz16
NUC2         1H
PCPD2       80.00 usec
PL2         1.00 dB
PL12        15.00 dB
PL13        21.13 dB
PL1W        18.35611289 W
PL1W        0.35207343 w
PL1W        8.17988549 W
SFO2        500.1362600 MHz
=====
F2 - Processing parameters
SI          45594
SF          202.4234500 MHz
MEM         EM
GB          0
GB          3.00 Hz
GD          0
PC          1.40

```

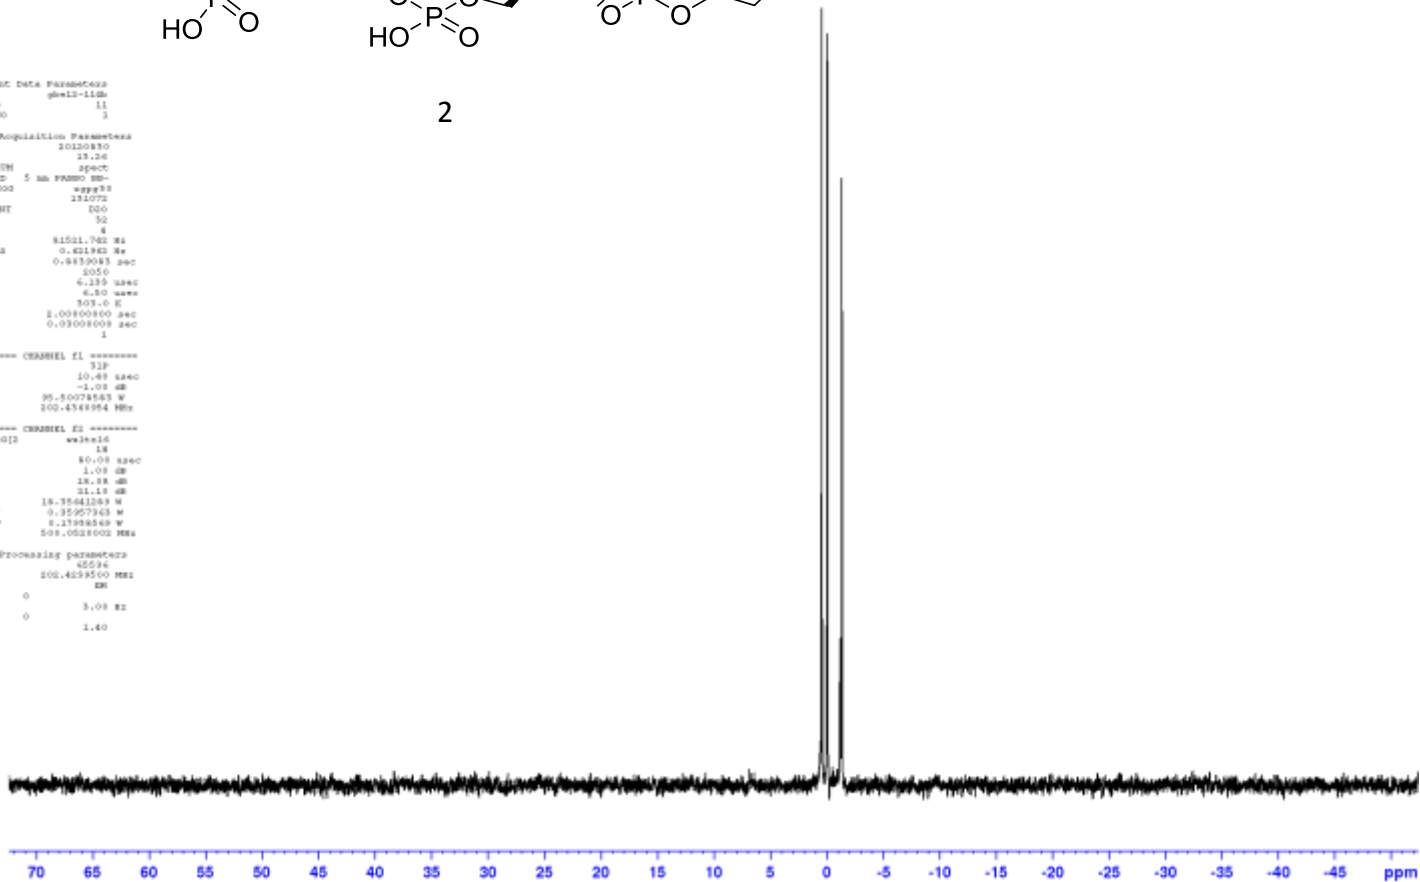

# HPLC

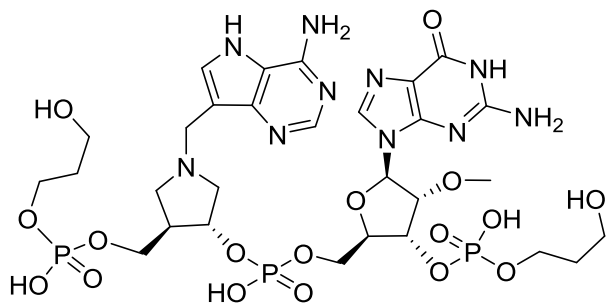

2

Data File D:\DATA\2013\DEC042013\20131204A 2013-12-04 09:54:44\JMGBE12114PREP.D

Sample Name: jmgbe12114prep

```

=====
Acq. Operator   : SYSTEM                      Seq. Line   :    5
Acq. Instrument : LCMS                      Location    : Vial 73
Injection Date  : 12/4/2013 10:39:21 AM      Inj         :    1
                                           Inj Volume  : 1.000 µl
Acq. Method     : D:\DATA\DEC042013\20131204A 2013-12-04 09:54-44\P1 T9 AW BM FA 5-50M G5H1 .
                                           9-20.M
Last changed    : 12/4/2013 9:54:44 AM by SYSTEM
Analysis Method : D:\DATA\2013\DEC042013\20131204A 2013-12-04 09:54-44\P1 T9 AW BM FA 5-50M
                                           G5H1 .9-20.M (Sequence Method)
Last changed    : 12/4/2013 9:54:44 AM by SYSTEM
Method Info     : Position 1; Poroshell 120 EC-C18 3x50mm 2.7µm; A:Water+0.1FA, B:MeOH; T0-
                                           5min 5-50%B; T5-6 min 50%B; Flow 0.5 mL/min; m/z 100-1000
    
```

Additional Info : Peak(s) manually integrated

DAD1 B, Sig=254,4 Ref=360,100 (D:\DATA\2013\DEC042013\20131204A 2013-12-04 09:54-44\JMGBE12114PREP.D)

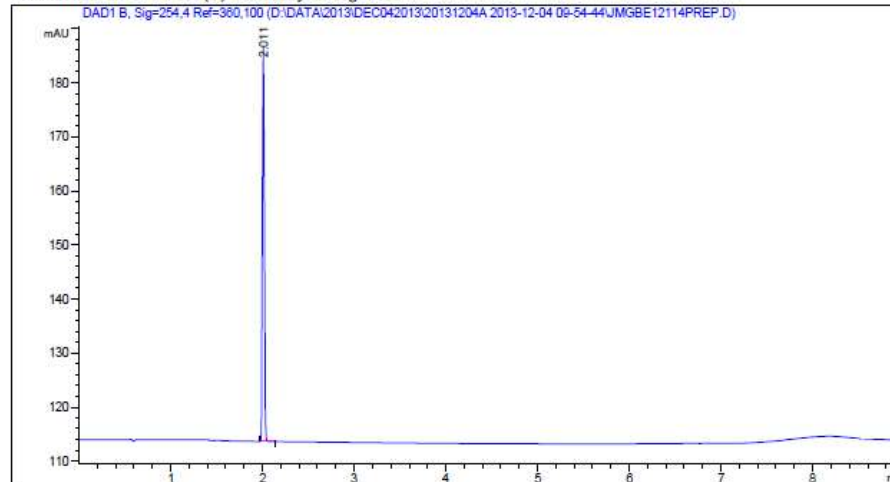

## Area Percent Report

```

Sorted By      : Signal
Multiplier     : 1.0000
Dilution      : 1.0000
Do not use Multiplier & Dilution Factor with ISTDs
    
```

Signal 1: DAD1 B, Sig=254,4 Ref=360,100

| Peak # | RetTime [min] | Type | Width [min] | Area [mAU*s] | Height [mAU] | Area %   |
|--------|---------------|------|-------------|--------------|--------------|----------|
| 1      | 2.011         | BB   | 0.0234      | 109.22290    | 73.32470     | 100.0000 |

Totals : 109.22290 73.32470

<sup>1</sup>H NMR  
500 MHz

Current Data Parameters  
NAME jmg289  
EXPNO 10  
PROCNO 1

F2 - Acquisition Parameters  
Date\_ 20131120  
Time 0.08  
INSTRUM spect  
PROBHD 5 mm PABBO BB-  
PULPROG zgpg30  
TD 65536  
SOLVENT CDCl3  
NS 32  
DS 2  
SWH 10336.578 Hz  
FIDRES 0.157632 Hz  
AQ 3.1719425 sec  
RG 57  
CW 49.409 usec  
DE 6.50 usec  
TE 303.2 K  
D1 1.0000000 sec  
TDO 1

----- CHANNEL f1 -----  
NUC1 1H  
P1 11.20 usec  
PL1 18.35600090 W

F2 - Processing parameters  
SI 32768  
SF 500.050033 MHz  
NUC 1H  
SFB 0  
LB 0.30 Hz  
GB 0  
PC 1.00

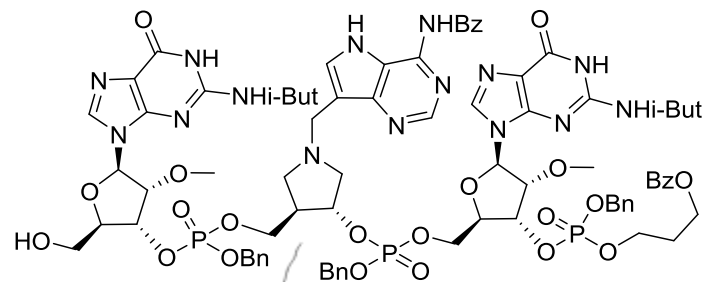

24

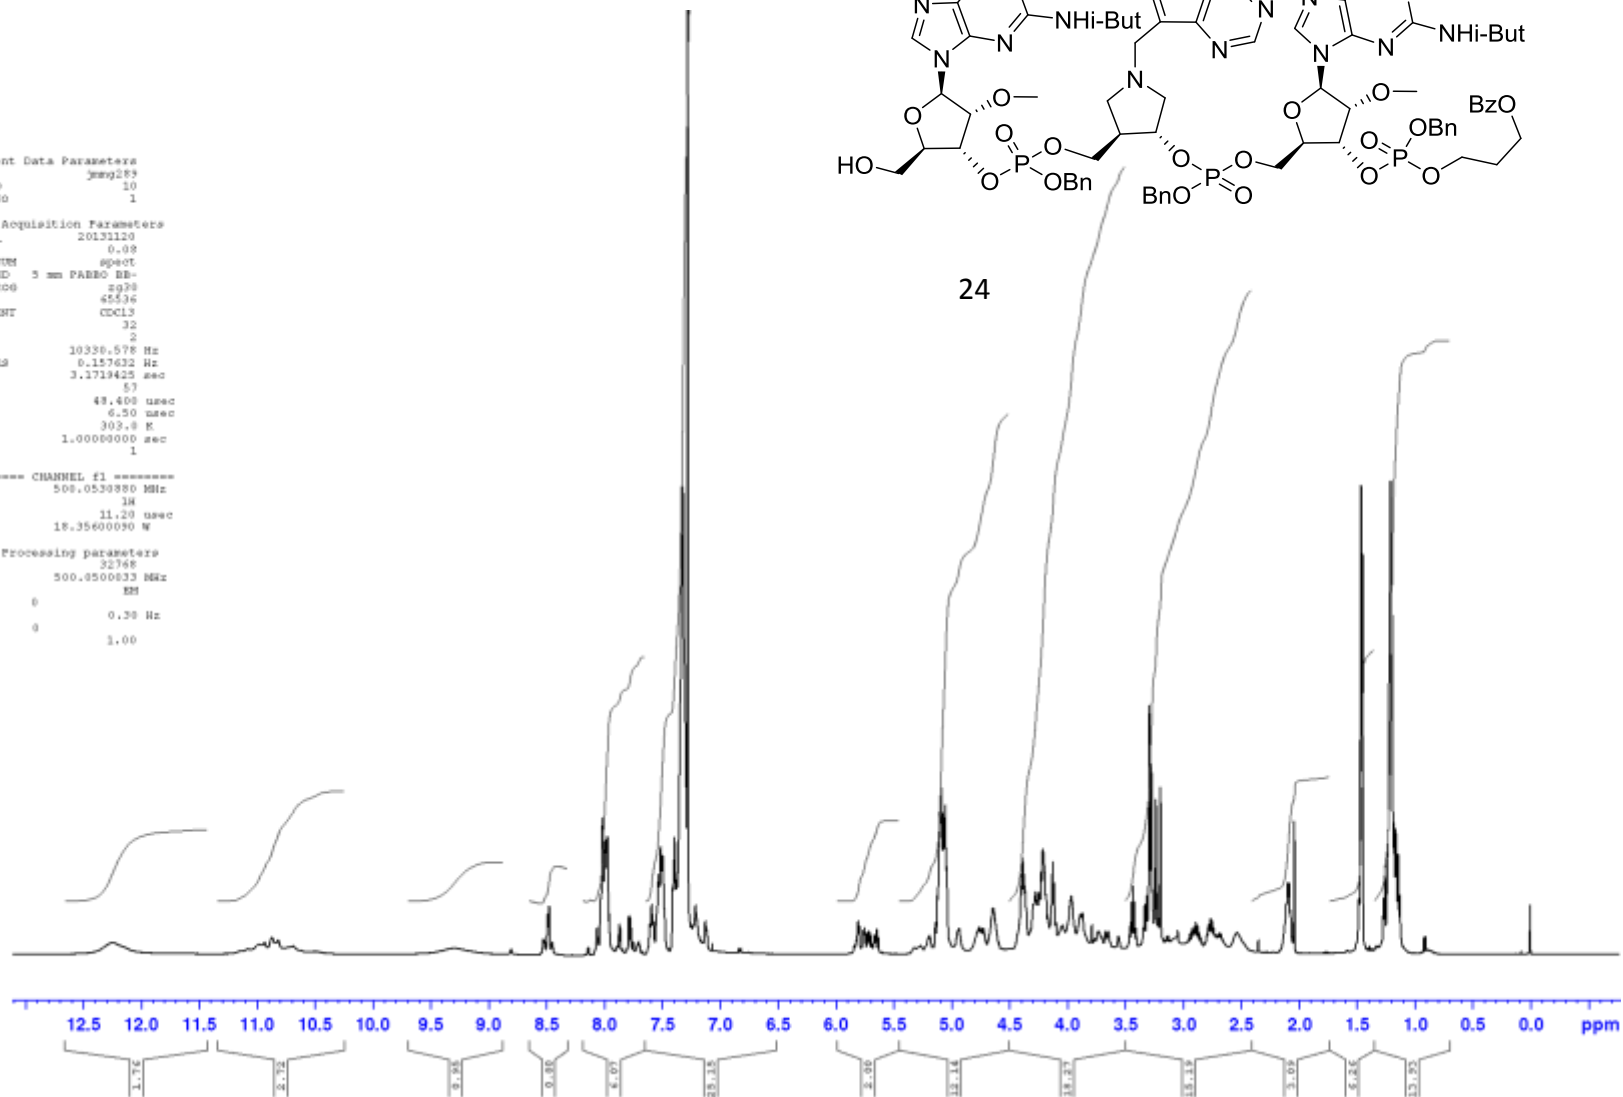

**<sup>13</sup>C NMR  
126 MHz**

Current Data Parameters  
NAME Jmg289  
EXPNO 14  
PROCNO 1

F2 - Acquisition Parameters  
Date\_ 20131120  
Time 4.01  
INSTRUM spect  
PROBHD 5 mm PABBO BB-  
PULPROG zgpg30  
TD 65536  
SOLVENT cdcl3  
NS 6000  
DS 4  
SWH 31256.000 MHz  
FIDRES 0.476827 Hz  
AQ 1.0485700 sec  
RG 301  
DM 16.000 usec  
DE 9.08 usec  
TE 303.0 K  
D1 0.50000000 sec  
D11 0.03000000 sec  
TDO 1

----- CHANNEL f1 -----  
SFO1 125.7508733 MHz  
NUC1 13C  
P1 9.00 usec  
PL1 123.9599908 W

----- CHANNEL f2 -----  
SFO2 500.0520002 MHz  
NUC2 1H  
CFPRG2 waltz16  
PCPG2 80.00 usec  
PLM2 18.35600090 W  
PLM12 0.33978001 W  
PLM13 0.23026000 W

F2 - Processing parameters  
SI 32768  
SF 125.7376730 MHz  
NUM 830  
SFB 0  
LB 3.00 Hz  
GB 0  
PC 1.40

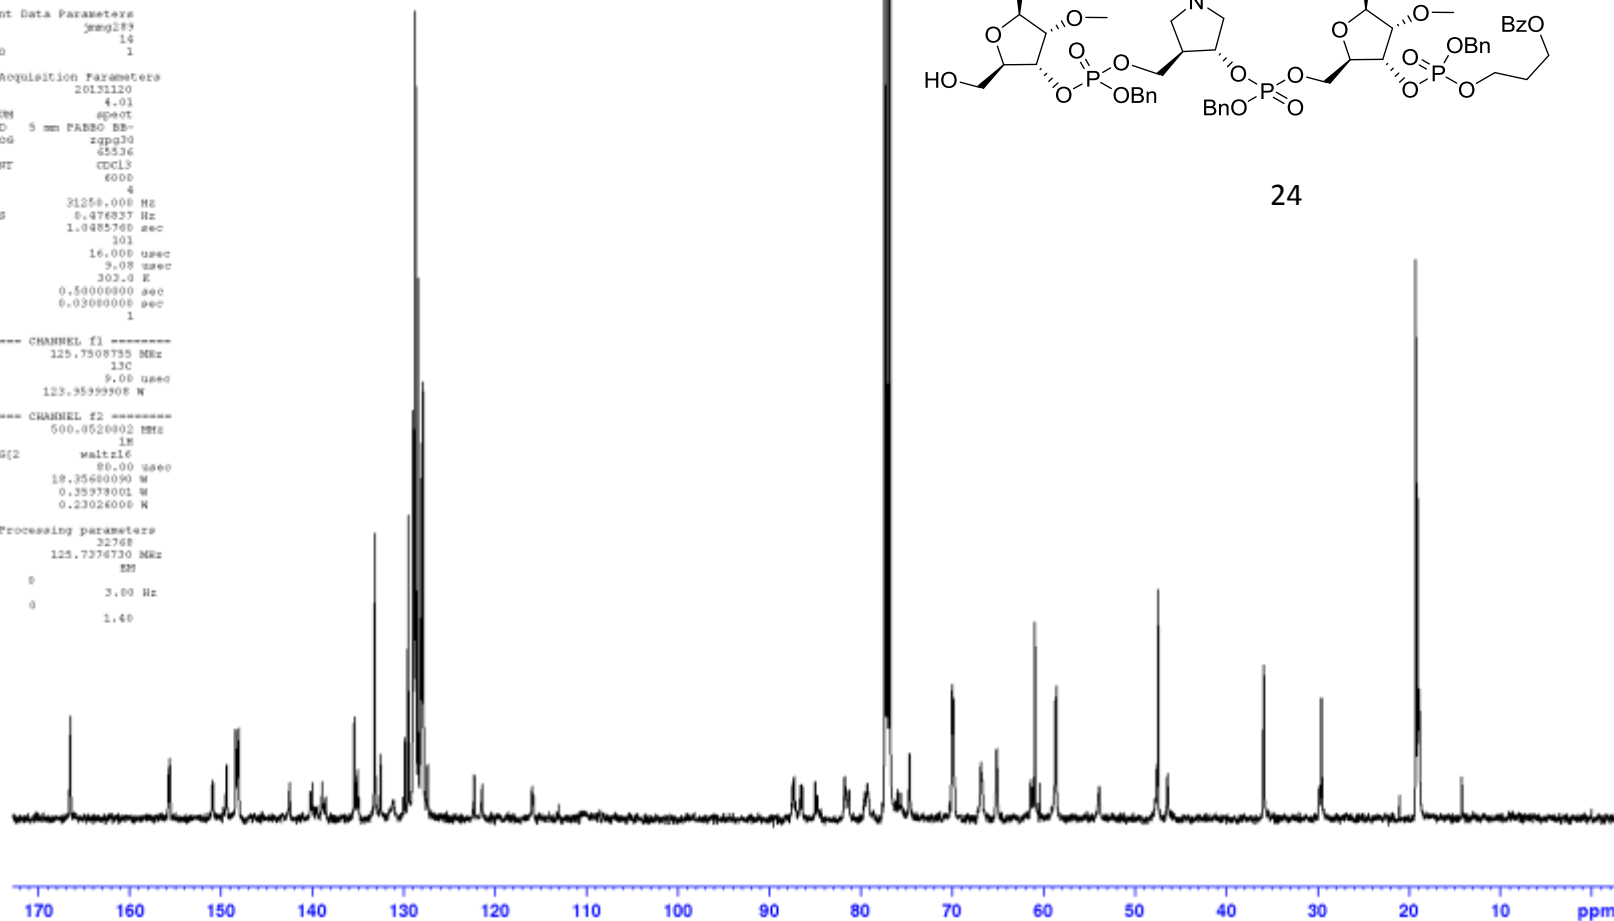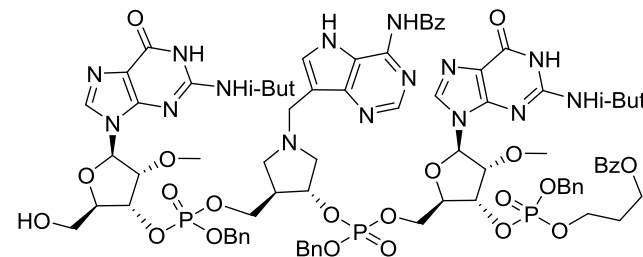

24





**<sup>1</sup>H NMR  
500 MHz**

Current Data Parameters  
NAME jmg293  
EXPNO 20  
PROCNO 1

F2 - Acquisition Parameters  
Date\_ 20131207  
Time 20.10  
INSTRUM spect  
PROBHD 5 mm PABBO BB-  
PULPROG zg30  
TD 65536  
SOLVENT d2o  
NS 32  
DS 2  
SWH 10302.198 Hz  
FIDRES 0.157199 Hz  
AQ 3.1806805 sec  
RG 203  
DW 48.533 usec  
DE 10.00 usec  
TE 303.0 K  
D1 1.0000000 sec  
TDO 1

===== CHANNEL f1 =====  
NUCL 1H  
P1 10.80 usec  
PL1 -3.00 dB  
PL1W 23.55579948 W  
SFO1 499.8430867 MHz

F2 - Processing parameters  
SI 32768  
SF 499.8399561 MHz  
WDM EM  
SGB 0  
LB 0.30 Hz  
GB 0  
FC 1.00

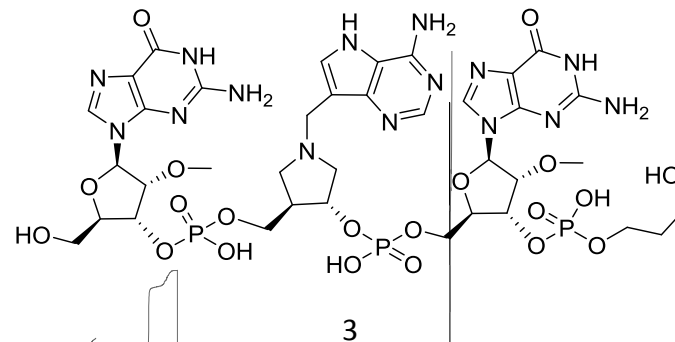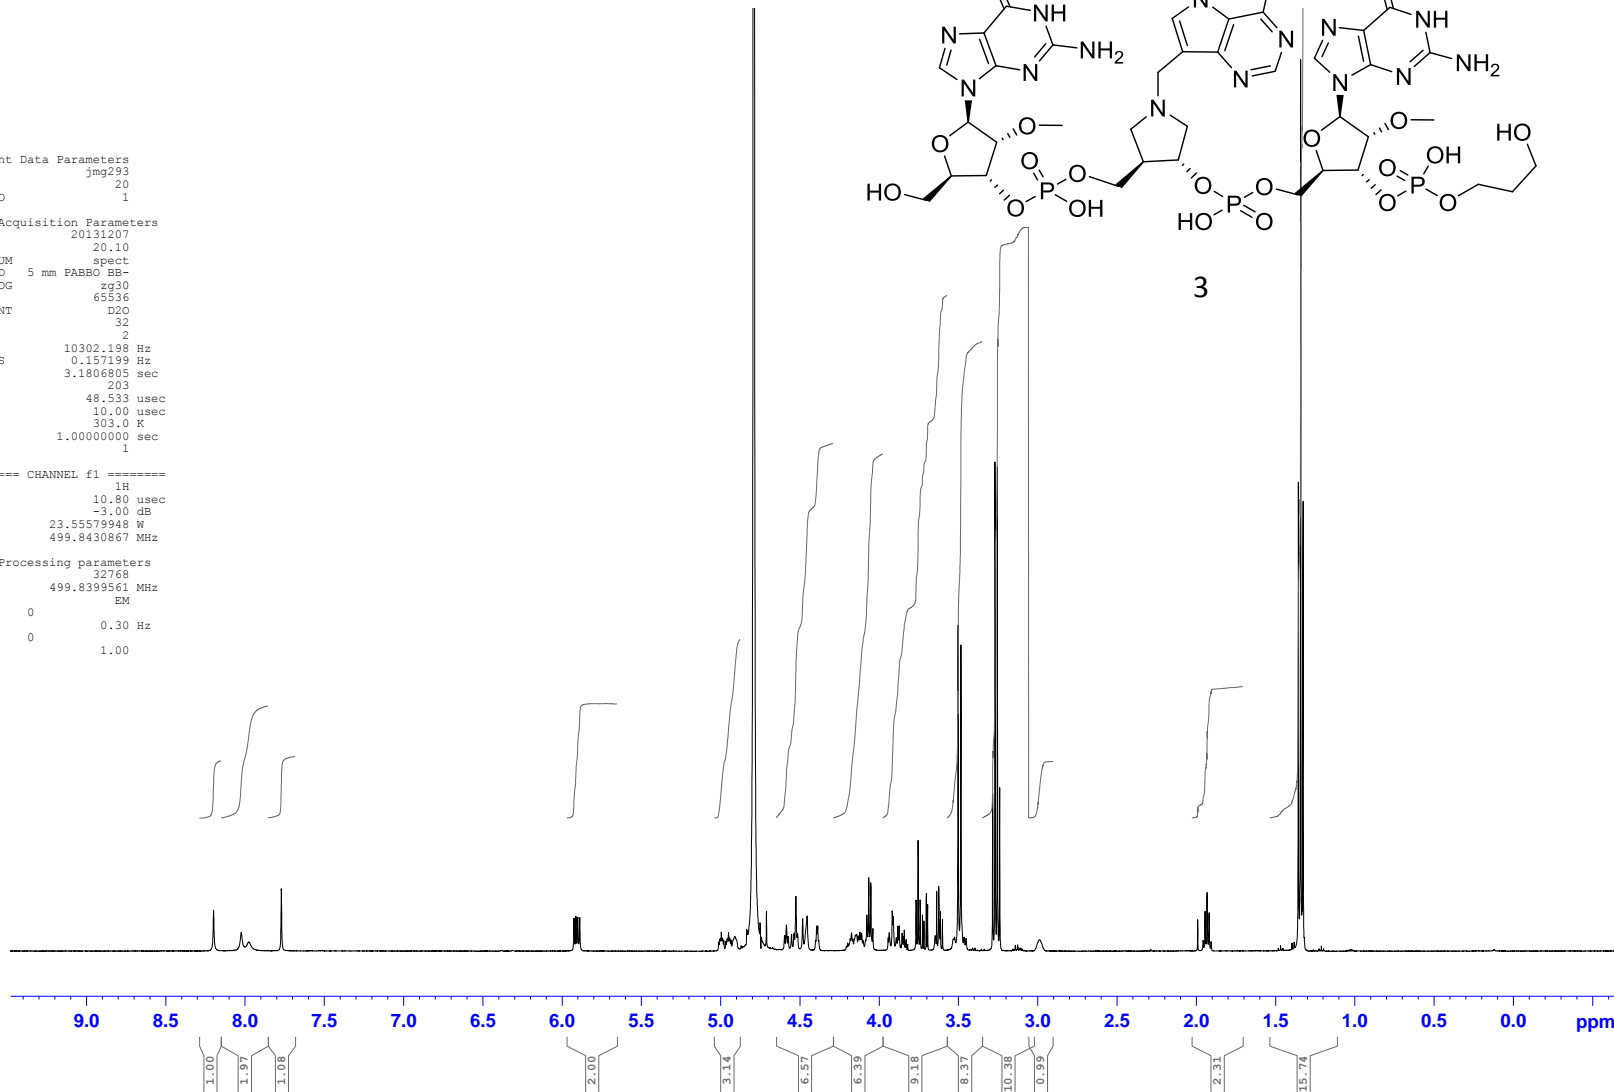

<sup>13</sup>C NMR  
126 MHz

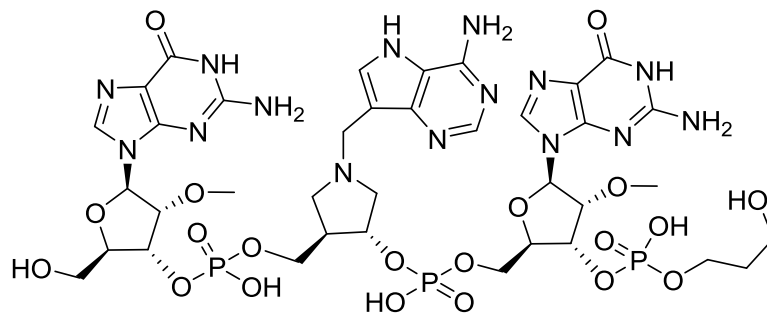

3

```

Current Data Parameters
NAME      3a493
EXPNO    24
PROCNO    1

F2 - Acquisition Parameters
Date_     2012128
Time      7:24
INSTRUM   spect
PROBHD    5 mm PABBO MM-
PULPROG   zgpg30
TD         65536
SOLVENT   D2O
NS         25405
DS         4
SWH        31250.000 Hz
FIDRES     0.476837 Hz
AQ         1.0480760 sec
RG         2050
DW         14.600 sec
DE         13.00 sec
TE         303.0 K
D1         0.8800000 sec
D11        0.0300000 sec
TDC        1

===== CHANNEL f1 =====
NUC1       13C
P1         11.00 sec
PL1        3.80 dB
PL1W       33.7249027 W
SFO1       125.094648 MHz

===== CHANNEL f2 =====
CPDPRG2    waltz16
NUC2       1H
PCPD2      88.00 sec
PL2         -3.80 dB
PL12        14.39 dB
PL13        17.90 dB
PL2W       23.2557994 W
PL12W      2.4286822 W
PL13W      0.19144475 W
SFO2       499.8419996 MHz

F2 - Processing parameters
SI         32768
SF         125.094648 MHz
WDW        EM
SSB         0
LB          3.00 Hz
GB          0
PC          1.48

```

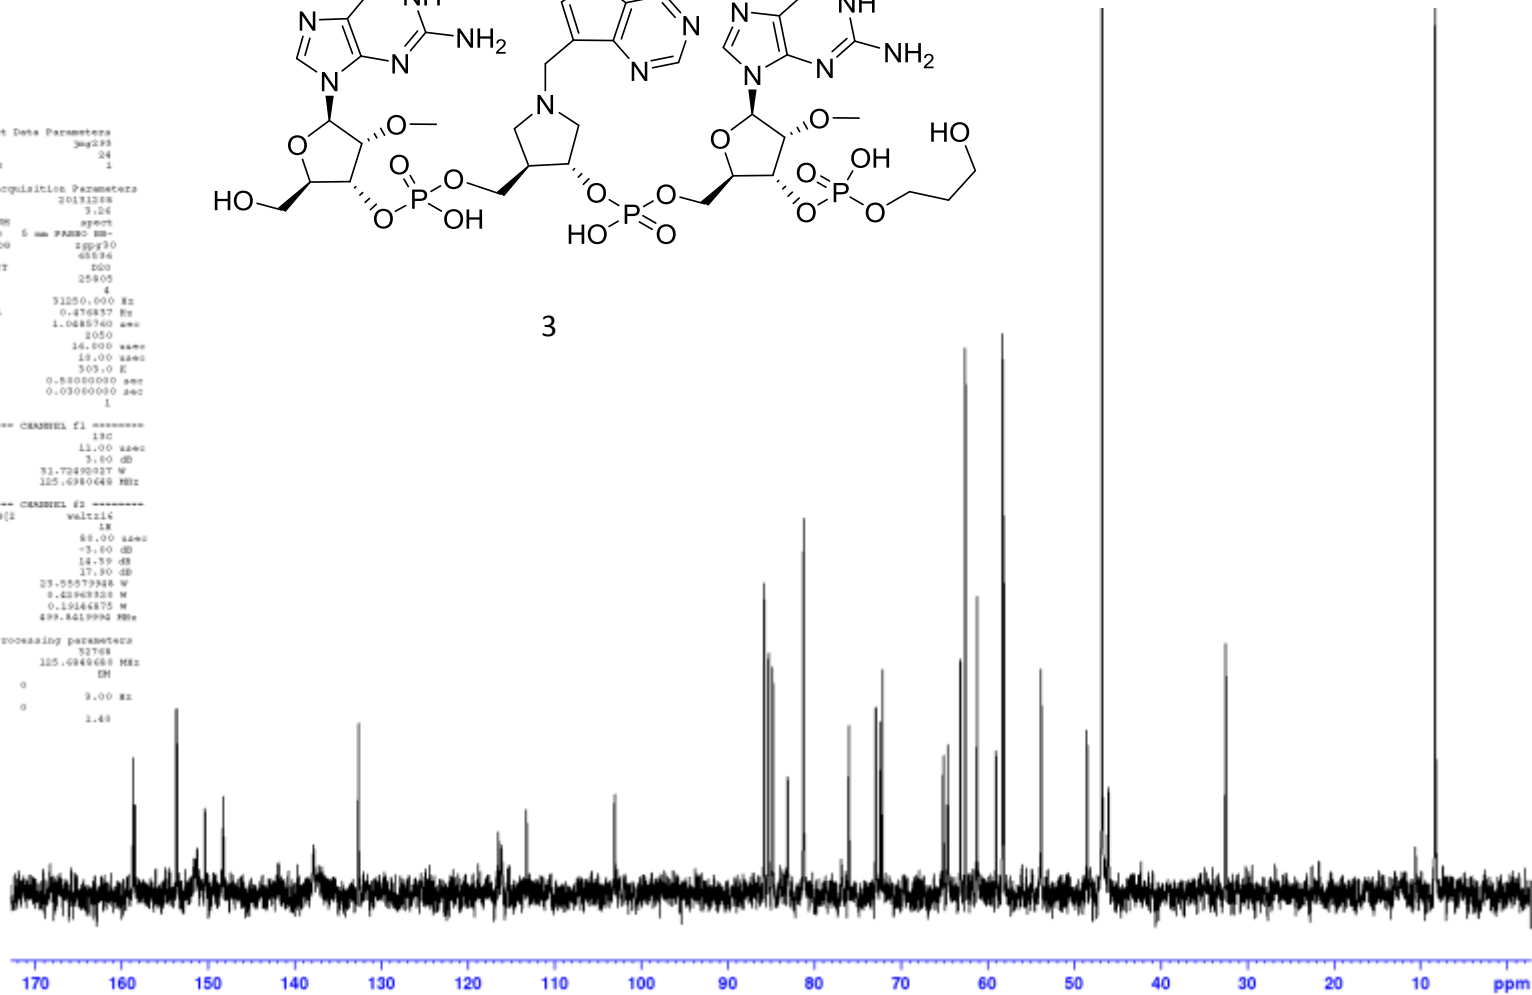



# HPLC

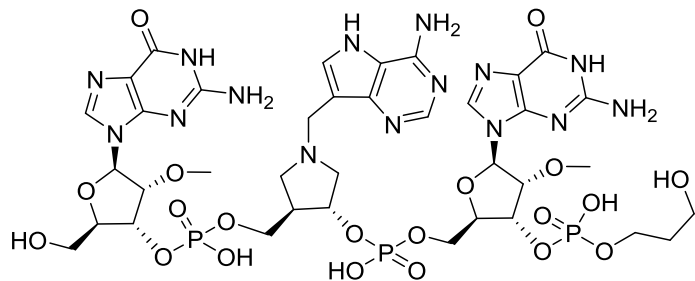

3

Data File D:\DATA\2013\DEC042013\20131204A 2013-12-04 09-54-44\JMG293PREP.D

Sample Name: jmg293prep

```

=====
Acq. Operator   : SYSTEM                      Seq. Line :    4
Acq. Instrument : LCMS                       Location  : Vial 72
Injection Date  : 12/4/2013 10:28:45 AM      Inj       :    1
                                           Inj Volume: 1.000 µl

Acq. Method    : D:\DATA\DEC042013\20131204A 2013-12-04 09-54-44\P1 T9 AW BM FA 5-50M G5H1 .
                9-20.M
Last changed   : 12/4/2013 9:54:44 AM by SYSTEM
Analysis Method: D:\DATA\2013\DEC042013\20131204A 2013-12-04 09-54-44\P1 T9 AW BM FA 5-50M
                G5H1 .9-20.M (Sequence Method)
Last changed   : 5/9/2016 4:45:38 PM by SYSTEM
                (modified after loading)
Method Info    : Position 1; Poroshell 120 EC-C18 3x50mm 2.7µm; A:Water+0.1FA, B:MeOH; T0-
                5min 5-50%B; T5-6 min 50%B; Flow 0.5 mL/min; m/z 100-1000
    
```

Additional Info : Peak(s) manually integrated

DAD1 B, Sig=254,4 Ref=360,100 (D:\DATA\2013\DEC042013\20131204A 2013-12-04 09-54-44\JMG293PREP.D)

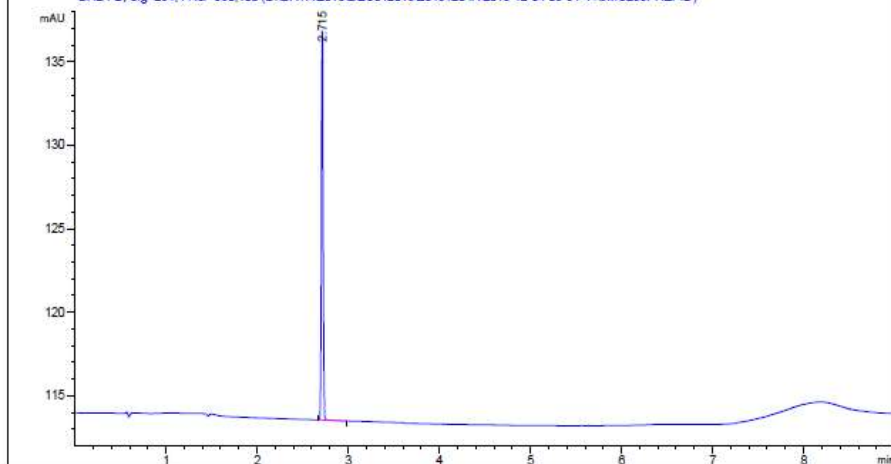

## Area Percent Report

```

=====
Sorted By      : Signal
Multiplier     : 1.0000
Dilution       : 1.0000
Do not use Multiplier & Dilution Factor with ISTDs
    
```

Signal 1: DAD1 B, Sig=254,4 Ref=360,100

| Peak # | RetTime [min] | Type | Width [min] | Area [mAU*s] | Height [mAU] | Area %   |
|--------|---------------|------|-------------|--------------|--------------|----------|
| 1      | 2.715         | BB   | 0.0222      | 32.70576     | 23.58244     | 100.0000 |

**<sup>1</sup>H NMR  
500 MHz**

Current Data Parameters  
NAME jmg294  
EXPNO 10  
PROCNO 1

F2 - Acquisition Parameters  
Date\_ 20131210  
Time 17.48  
INSTRUM spect  
PROBHD 5 mm PABBO BB-  
PULPROG zg30  
TD 65536  
SOLVENT d2o  
NS 32  
DS 2  
SWH 10330.578 Hz  
FIDRES 0.157632 Hz  
AQ 3.1719425 sec  
RG 128  
DW 48.400 usec  
DE 6.50 usec  
TE 303.0 K  
D1 1.0000000 sec  
TDO 1

==== CHANNEL f1 =====  
SFO1 500.0530880 MHz  
NUC1 1H  
P1 11.20 usec  
PLWL 18.35600090 W

F2 - Processing parameters  
SI 32768  
SF 500.0499566 MHz  
WDW EM  
SSB 0  
LB 0.30 Hz  
GB 0  
PC 1.00

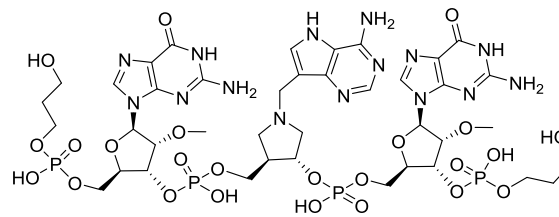

25

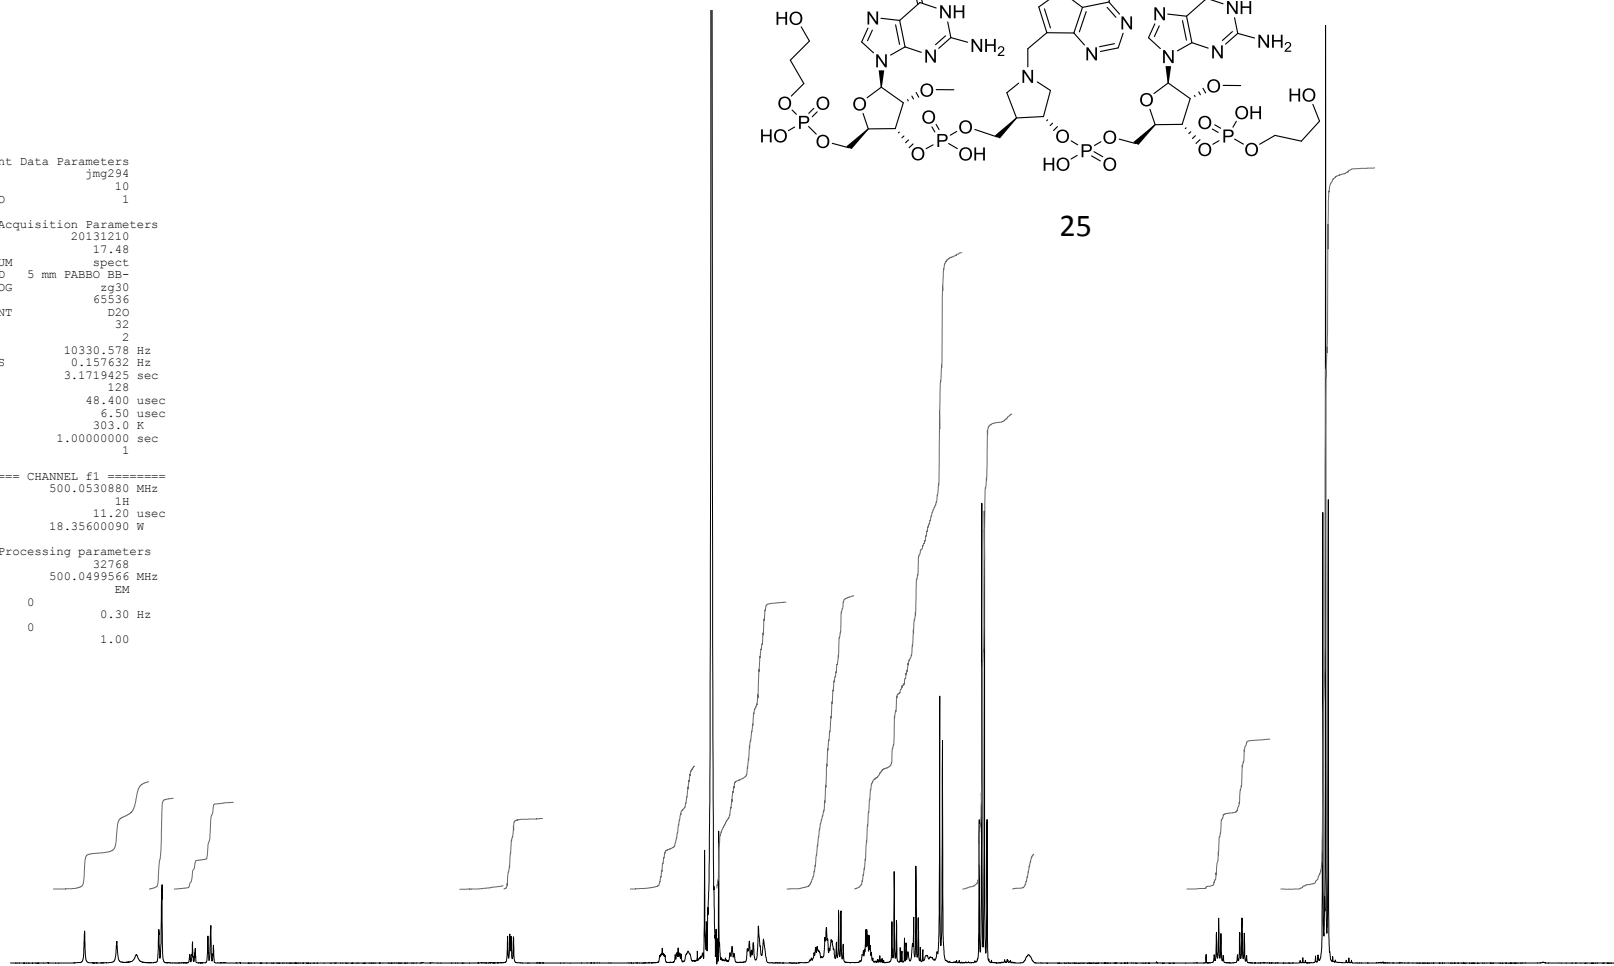

Integration values (from left to right): 3.04, 2.57, 2.45, 0.10, 2.00, 3.49, 8.11, 8.30, 18.00, 13.44, 0.99, 4.24, 20.39

<sup>13</sup>C NMR  
126 MHz

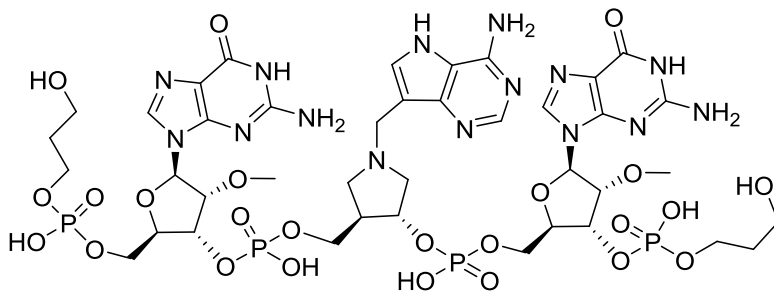

25

```
Current Data Parameters
NAME          jsg294
EXPNO        11
PROCNO       1

F2 - Acquisition Parameters
Date_        20131210
Time         22.39
INSTRUM      spect
PROBHD       5 mm PABBO BB-
PULPROG      zgpg30
TD           65536
SOLVENT      D2O
NS           11200
DS           4
SWH           31256.006 MHz
FIDRES       0.4768237 Hz
AQ           1.0485706 sec
RG           71.6
CM           16.008 usec
DE           9.08 usec
TE           303.0 K
D1           0.50000000 sec
D11          0.03000000 sec
TD0          1
```

```
----- CHANNEL f1 -----
SFO1      125.750733 MHz
NUC1       13C
P1         9.06 usec
PLM1      123.9599908 W
```

```
----- CHANNEL f2 -----
SFO2      500.0520002 MHz
NUC2       1H
CPDPRG2    waltz16
PCPD2      80.00 usec
PLM2       18.35600090 W
PLM12      0.39978001 W
PLM13      0.23026006 W
```

```
F2 - Processing parameters
SI         32768
SF         125.7376730 MHz
NUM        830
SFB        0
LB         3.00 Hz
GB         0
PC         1.40
```

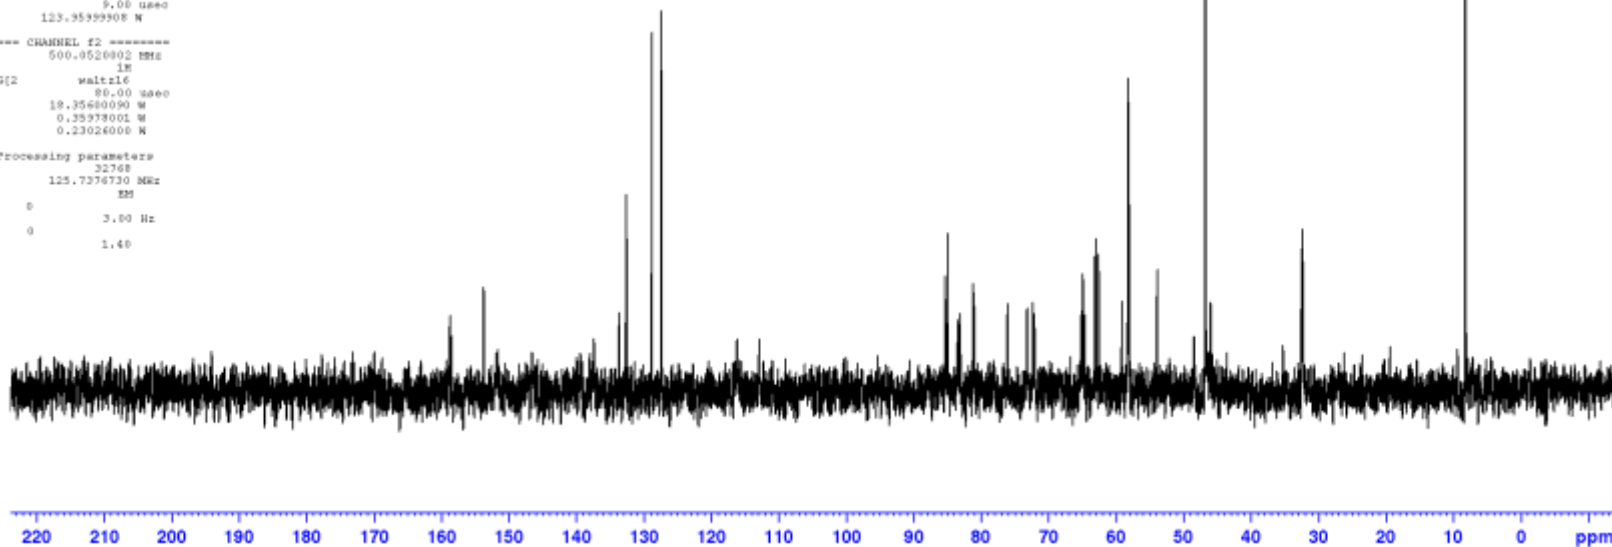

**<sup>31</sup>P NMR**  
**202 MHz**

Current Data Parameters  
NAME 39294  
EXPNO 10  
PROCNO 1

F2 - Acquisition Parameters  
Date\_ 20131211  
Time 6.02  
INSTRUM spect  
PROBHD 5 mm PARBO BR-  
PULPROG zgpg30  
TD 131072  
SOLVENT D2O  
NS 128  
DS 4  
SWH 81521.742 Hz  
FIDRES 0.421962 MHz  
AQ 0.8034083 sec  
RG 2050  
DN 6.132 0000  
DE 6.50 0000  
TE 303.0 K  
D1 2.08000000 sec  
D11 0.93000000 sec  
TD0 1

----- CHANNEL f1 -----  
SFO1 202.4360954 MHz  
NUC1 31P  
P1 18.40 usec  
PLM1 35.50099945 W

----- CHANNEL f2 -----  
SFO2 500.8520082 MHz  
NUC2 1H  
CPDPRG2 waltz16  
PCPD2 30.80 0000  
P1M2 18.35400098 W  
PLM2 0.35378001 W  
PLM3 0.23926000 W

F2 - Processing parameters  
SI 65536  
SF 202.4239500 MHz  
NUM 8  
SR 0  
LA 3.00 Hz  
GB 0  
PC 1.40

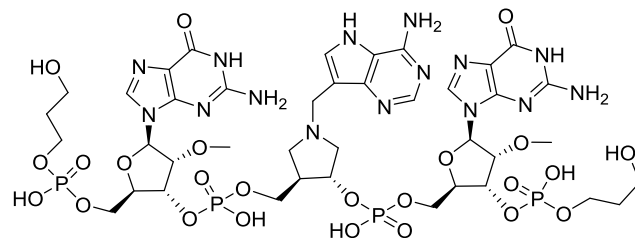

23

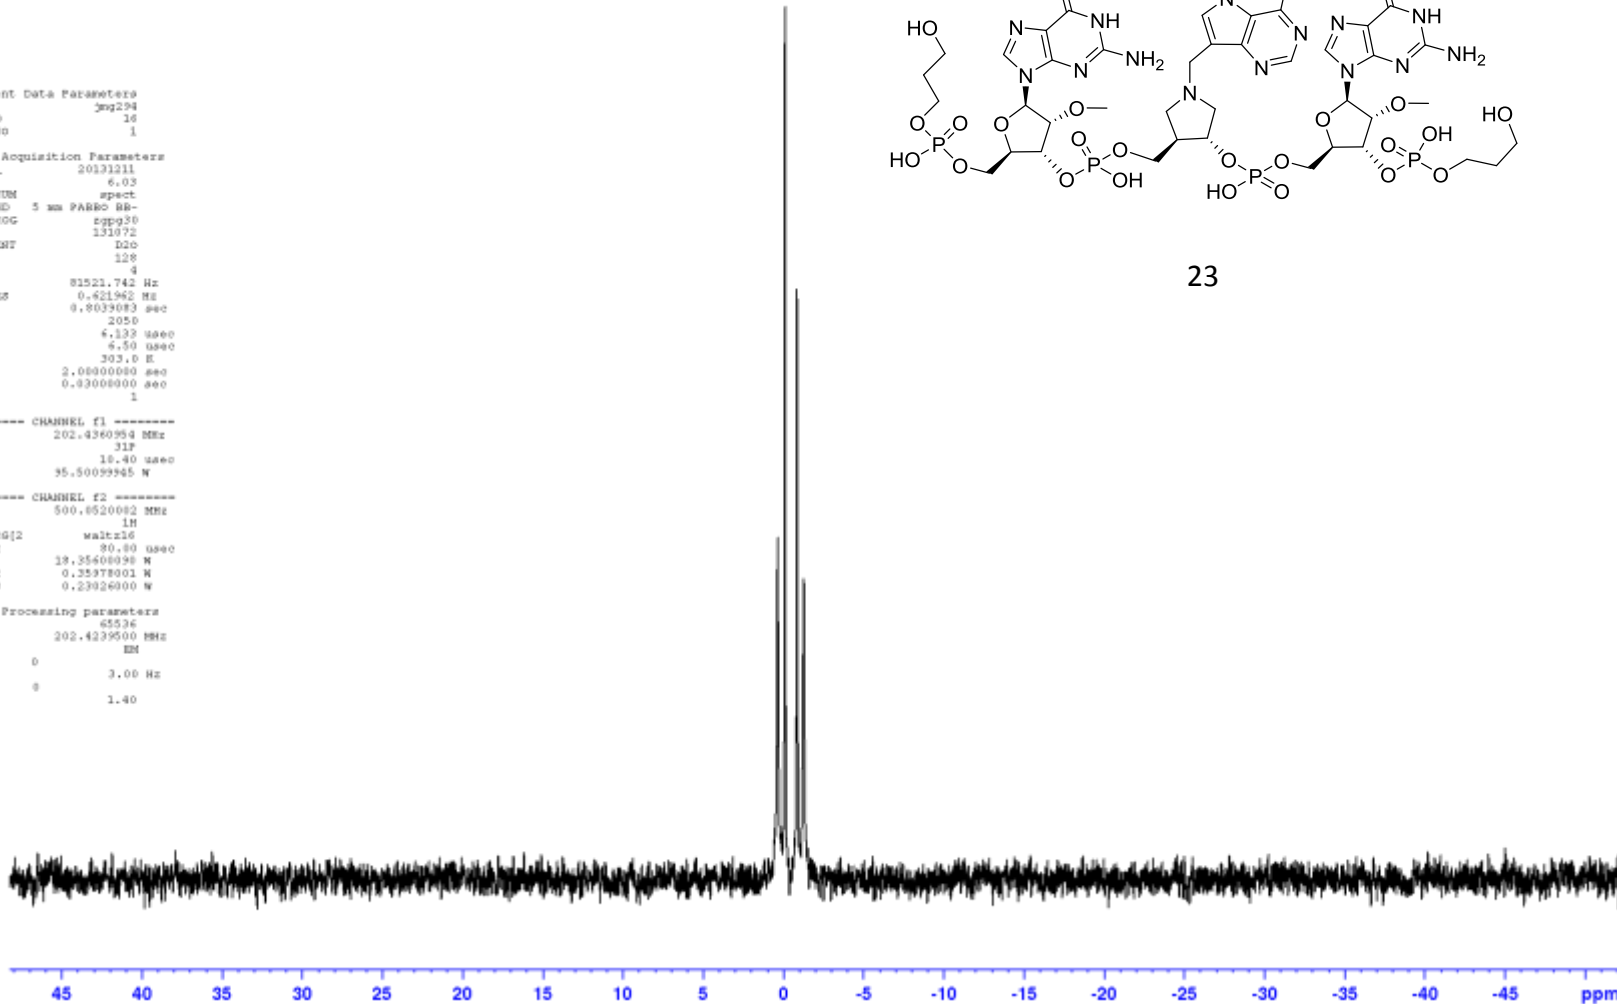

# HPLC

Data File D:\DATA\2013\DEC112013\20131211D 2013-12-11 15-57-40\082-0301.D  
 Sample Name: jmg294

```

=====
Acq. Operator   : SYSTEM                      Seq. Line :    3
Acq. Instrument : LCMS                      Location  : Vial 82
Injection Date  : 12/11/2013 4:15:40 PM      Inj       :    1
                                           Inj Volume: 1.000 µl
Acq. Method    : D:\DATA\DEC112013\20131211D 2013-12-11 15-57-40\P1 T9 AW BM FA 5-100M G5H1
                                           3-25.M
Last changed   : 12/11/2013 3:57:41 PM by SYSTEM
Analysis Method: D:\DATA\2013\DEC112013\20131211D 2013-12-11 15-57-40\P1 T9 AW BM FA 5-100M
                                           G5H1 3-25.M (Sequence Method)
Last changed   : 12/11/2013 3:57:41 PM by SYSTEM
Method Info    : Position 1; Poroshell 120 EC-C18 3x50mm 2.7µm; A:Water+0.1FA, B:MeOH; T0-
                                           5min 5-100%B; T5-6min 100%B; Flow 0.5 mL/min; m/z 300-2000
  
```

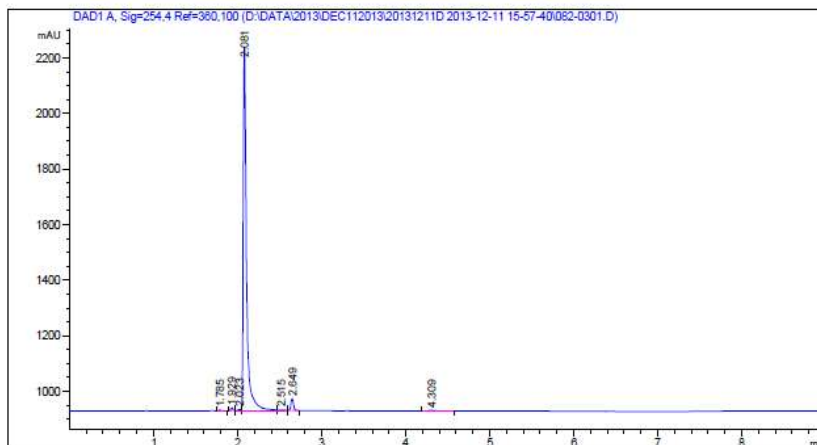

## Area Percent Report

```

Sorted By      : Signal
Multiplier    : 1.0000
Dilution      : 1.0000
Do not use Multiplier & Dilution Factor with ISTDs
  
```

Signal 1: DAD1 A, Sig=254,4 Ref=360,100

| Peak # | RetTime [min] | Type | Width [min] | Area [mAU*s] | Height [mAU] | Area %  |
|--------|---------------|------|-------------|--------------|--------------|---------|
| 1      | 1.785         | VB   | 0.0305      | 6.36841      | 3.15561      | 0.1752  |
| 2      | 1.929         | BB   | 0.0279      | 18.13001     | 10.13969     | 0.4989  |
| 3      | 2.023         | BV   | 0.0301      | 7.25558      | 3.65786      | 0.1997  |
| 4      | 2.081         | VV   | 0.0390      | 3496.35181   | 1316.00757   | 96.2138 |

Data File D:\DATA\2013\DEC112013\20131211D 2013-12-11 15-57-40\082-0301.D  
 Sample Name: jmg294

| Peak # | RetTime [min] | Type | Width [min] | Area [mAU*s] | Height [mAU] | Area % |
|--------|---------------|------|-------------|--------------|--------------|--------|
| 5      | 2.515         | VB   | 0.0726      | 6.35399      | 1.22306      | 0.1749 |
| 6      | 2.649         | BB   | 0.0320      | 87.24861     | 42.48875     | 2.4009 |
| 7      | 4.309         | BB   | 0.0700      | 12.23151     | 2.54762      | 0.3366 |

Totals : 3633.93992 1379.22015

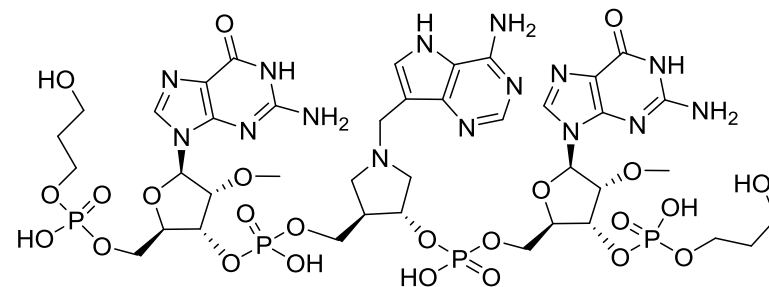

25



<sup>1</sup>H NMR  
500 MHz

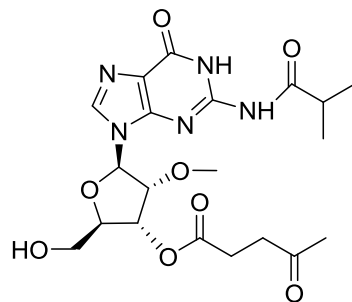

27

Current Data Parameters  
NAME JMWG212  
EXPNO 10  
PROCNO 1

F2 - Acquisition Parameters  
Date\_ 20130501  
Time 13.32  
INSTRUM spect  
PROBHD 5 mm PABBO BB-  
PULPROG zg30  
TD 45536  
SOLVENT CDCl3  
NS 32  
DS 2  
SWH 10330.578 Hz  
FIDRES 0.157632 Hz  
AQ 3.1719425 sec  
RG 301  
DM 49.400 usec  
DE 6.50 usec  
TE 302.9 K  
DL 1.0000000 sec  
TD0 1

===== CHANNEL f1 =====  
NUC1 1H  
P1 11.20 usec  
P11 1.00 dB  
F1IN 16.35641289 MHz  
SF01 500.0530880 MHz

F2 - Processing parameters  
S2 32768  
SF 500.0500937 MHz  
WDW EM  
SSB 0  
LB 0.39 Hz  
GB 0  
EC 1.00

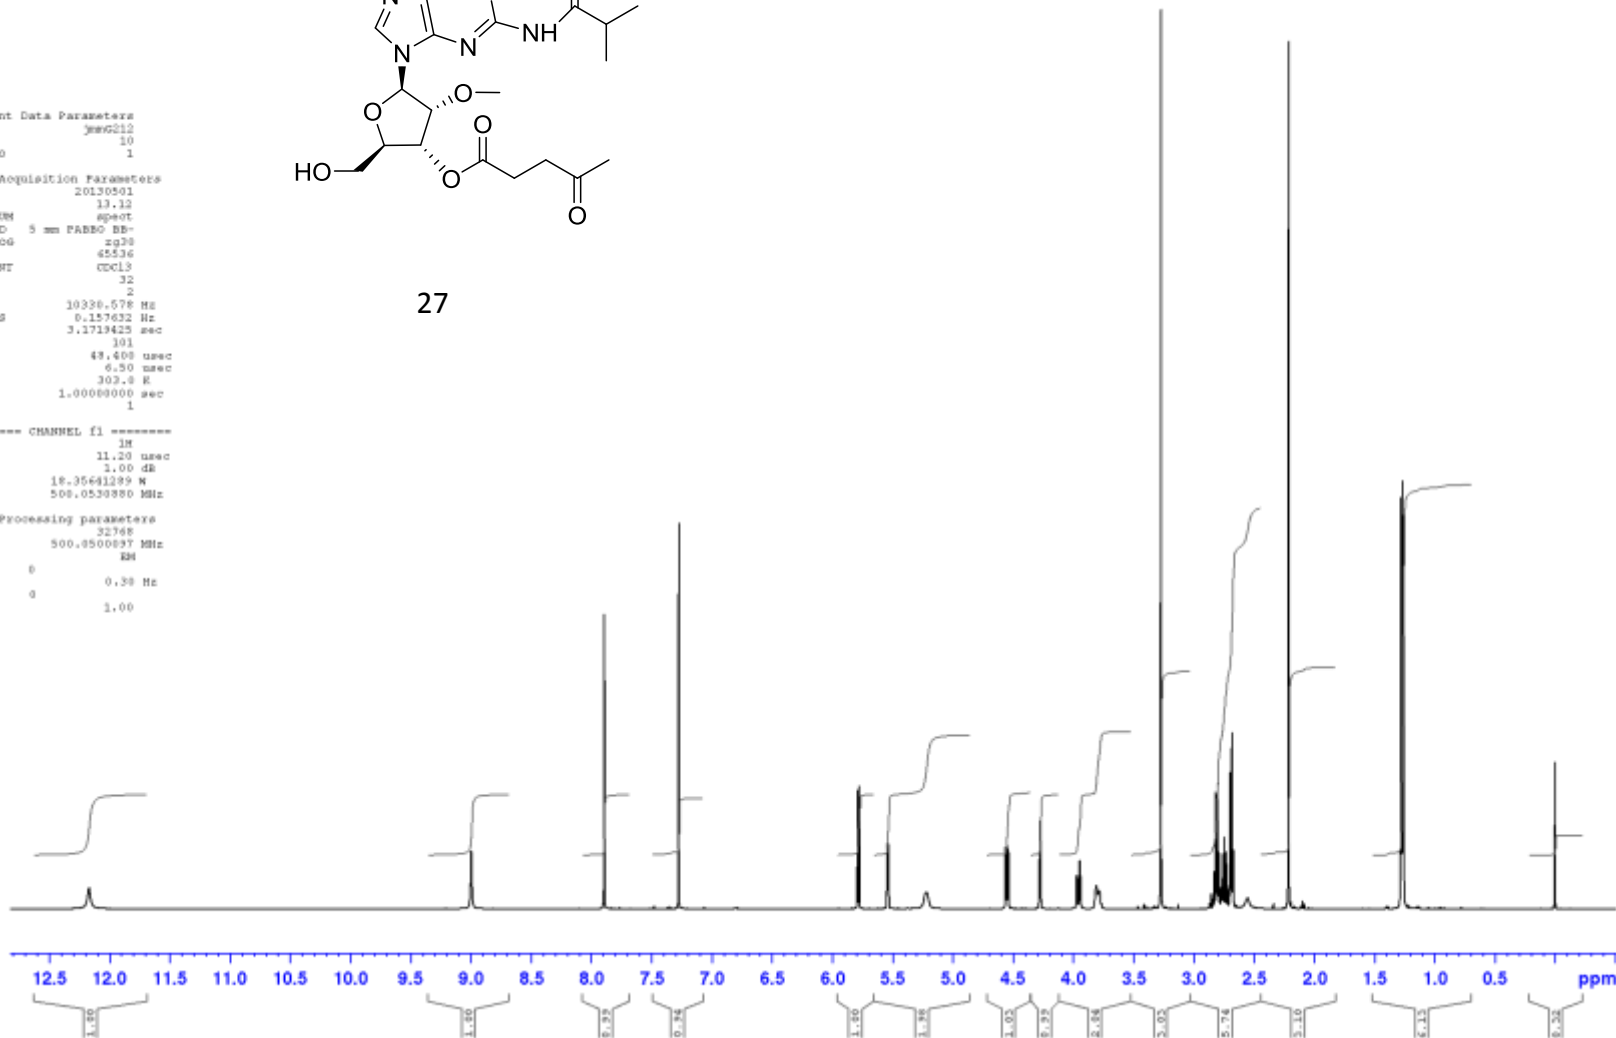

<sup>13</sup>C NMR  
126 MHz

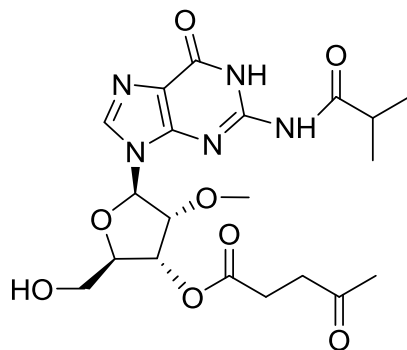

27

Current Data Parameters  
NAME jmm0212  
EXPNO 21  
PROCNO 1  
F2 - Acquisition Parameters  
Date\_ 20130501  
Time 21:34  
INSTRUM spect  
PROBHD 5 mm PABBO BB-  
PULPROG zgpg30  
TD 65536  
SOLVENT cpd13  
NS 4  
DS 4  
SWH 31250.000 Hz  
FIDRES 0.476837 Hz  
AQ 1.0485760 sec  
RG 203  
DW 16.000 usec  
DE 15.08 usec  
TE 305.0 K  
D3 8.59000000 sec  
D11 8.09000000 sec  
TEO 1

----- CHANNEL f1 -----  
NUC1 13C  
P1 9.00 usec  
PL1 -1.00 dB  
P1LW 125.9428884 W  
SFO1 125.7508755 MHz

----- CHANNEL f2 -----  
CPDPRG2 waltz16  
NUC2 1H  
PCPD2 80.00 usec  
P12 1.00 dB  
P1L2 19.98 dB  
P1L3 21.10 dB  
P2M 18.95441289 W  
P1L3M 0.35967363 W  
P1L3W 0.17983689 W  
SFO2 500.0520002 MHz

F2 - Processing parameters  
SI 32768  
SF 125.7376730 MHz  
MCM 3H  
ASB 0  
LB 3.00 Hz  
GB 0  
PC 1.49

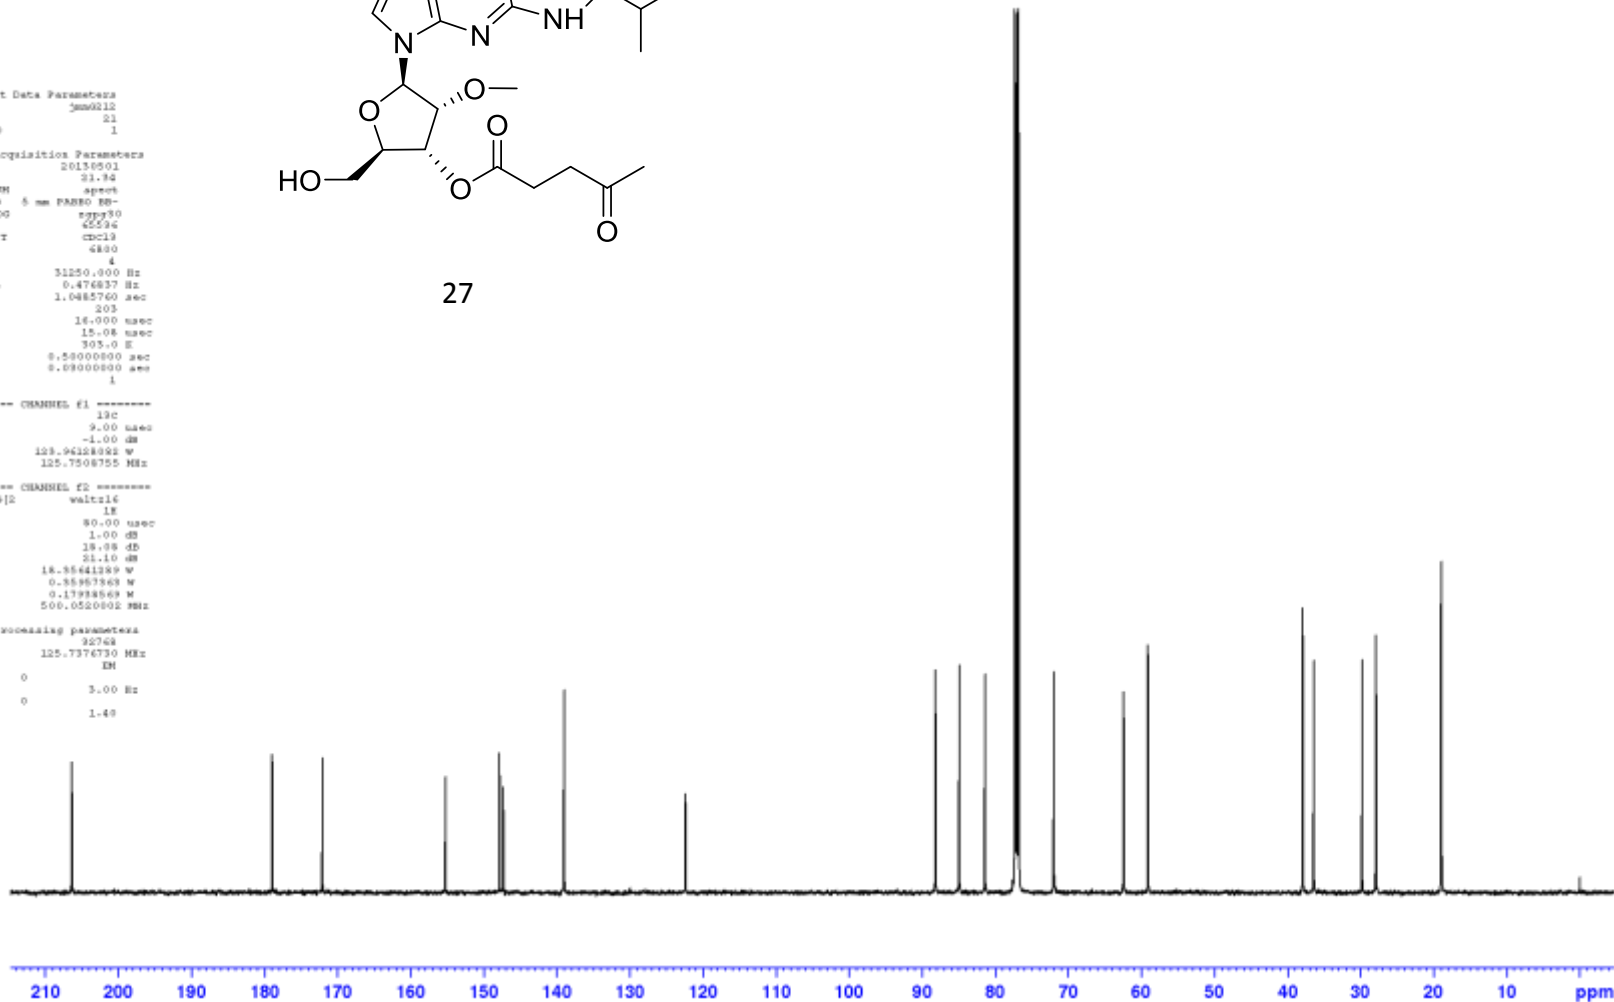

<sup>1</sup>H NMR  
500 MHz

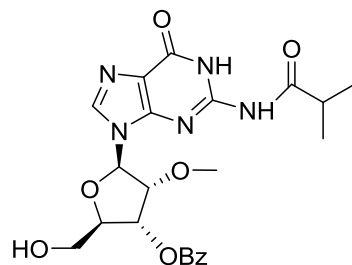

26

Current Data Parameters  
NAME gbel2074a  
EXPNO 10  
PROCNO 1

F2 - Acquisition Parameters  
Date\_ 20120420  
Time 22.43  
INSTRUM spect  
PROBHD 5 mm PABBO BB-  
PULPROG zg30  
TD 45536  
SOLVENT CDCl3  
NS 32  
DS 2  
SWH 10336.578 Hz  
FIDRES 0.157632 Hz  
AQ 3.1719425 sec  
RG 80.4  
DM 48.408 usec  
DE 6.50 usec  
TE 302.8 K  
DL 1.0000000 sec  
TD0 1

===== CHANNEL f1 =====  
NUC1 1H  
P1 11.20 usec  
P11 1.00 dB  
F1IN 18.35641289 MHz  
SF01 500.0539880 MHz

F2 - Processing parameters  
S2 32768  
SF 500.0500102 MHz  
WDW EM  
SSB 0  
LB 0.39 Hz  
GB 0  
FC 1.00

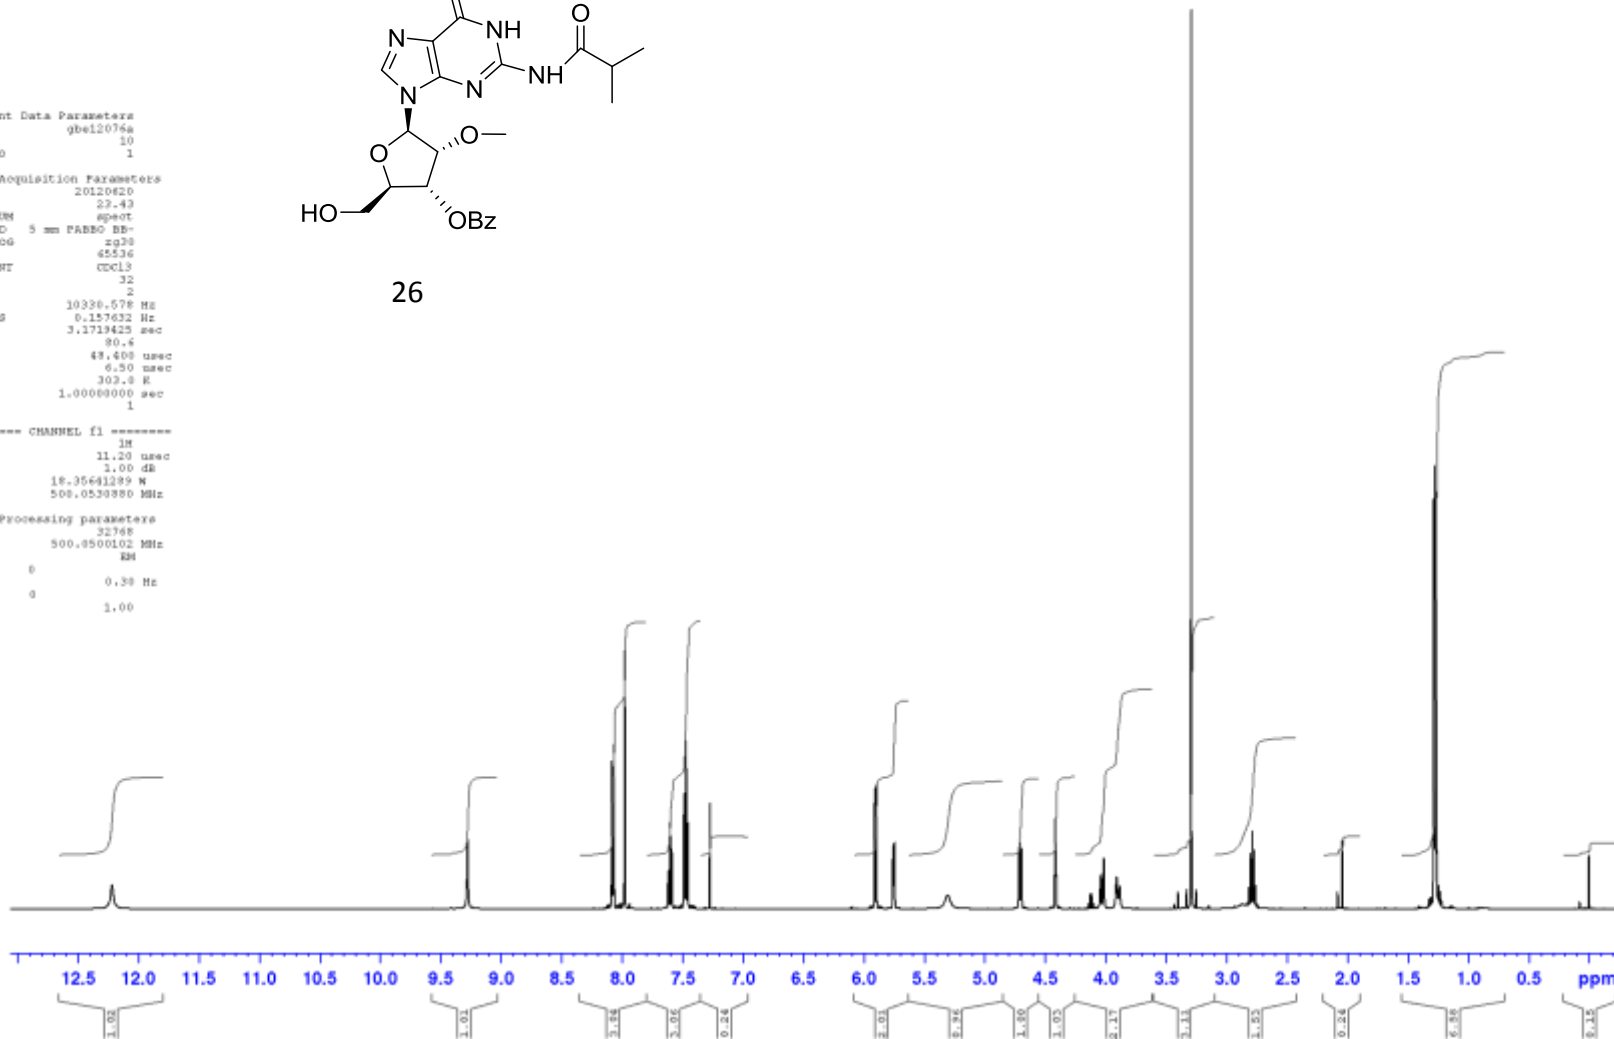

<sup>13</sup>C NMR  
126 MHz

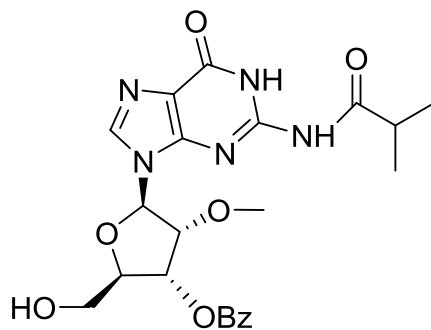

26

Current Data Parameters  
NAME gbal2076a  
EXPNO 11  
PROCNO 1  
F2 - Acquisition Parameters  
Date\_ 20120621  
Time 0.48  
INSTRUM spect  
PROBHD 5 mm PABBO BB-  
PULPROG zgpg30  
TD 65536  
SOLVENT cpd13  
NS 2400  
DS 4  
SWH 31250.000 Hz  
FIDRES 0.476837 Hz  
AQ 1.0485760 sec  
RG 2050  
DW 18.000 usec  
DE 15.08 usec  
TE 303.0 K  
D3 8.59000000 sec  
D11 8.09000000 sec  
TEO 1

----- CHANNEL F1 -----  
NUC1 13C  
P1 9.00 usec  
P11 -1.00 dB  
P1M 123.9428884 W  
SFO1 125.7508755 MHz

----- CHANNEL F2 -----  
CPDPRG2 waltz16  
NUC2 1H  
PCPD2 80.00 usec  
P12 1.00 dB  
P112 19.98 dB  
P113 21.10 dB  
P12M 18.95441289 W  
P112M 0.35967363 W  
P113M 0.17983669 W  
SFO2 500.0520002 MHz

F2 - Processing parameters  
SI 32768  
SF 125.7376730 MHz  
MCW 1H  
SAB 0  
LB 3.00 Hz  
GB 0  
PC 1.49

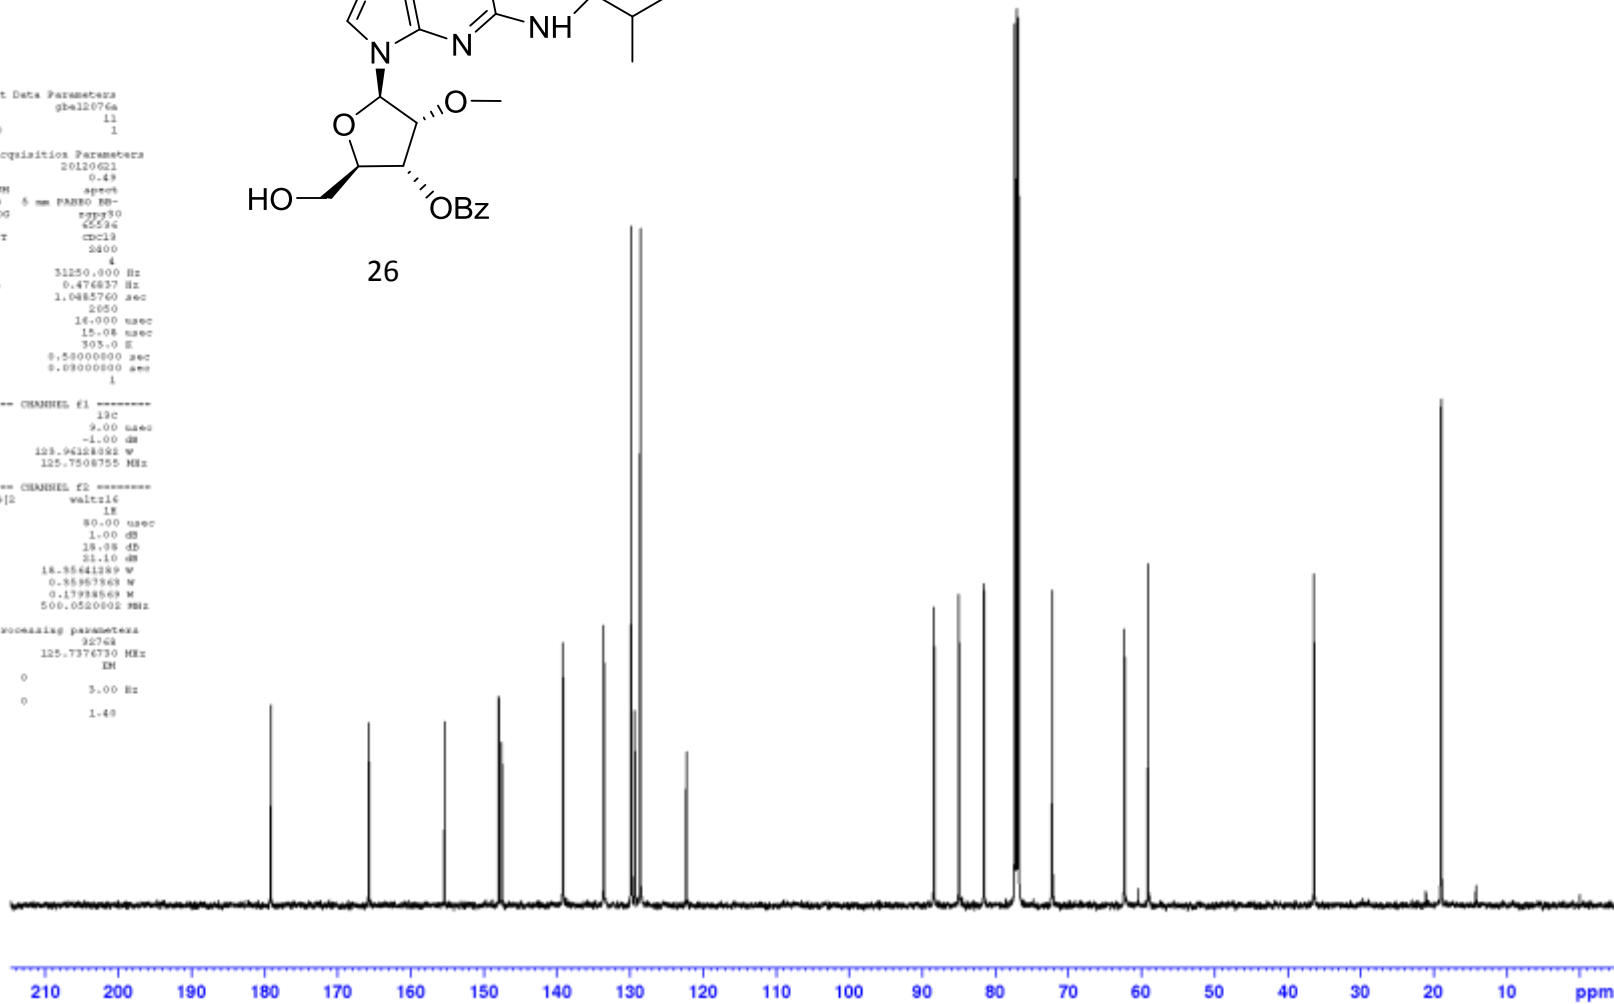

<sup>1</sup>H NMR  
500 MHz

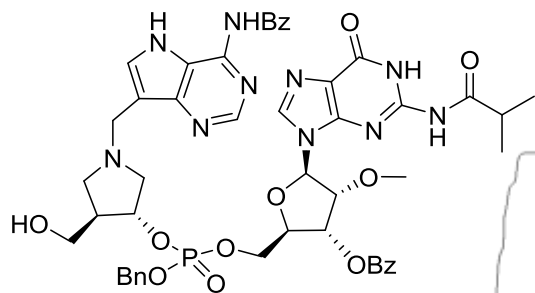

28

Current Data Parameters  
NAME gbel2-073a  
EXPNO 10  
PROCNO 1

F2 - Acquisition Parameters  
Date\_ 20120422  
Time 15:24  
INSTRUM spect  
PROBHD 5 mm PABBO BB-  
PULPROG zgpg30  
TD 65536  
SOLVENT ccd13  
NS 32  
DS 2  
SWH 10336.578 Hz  
FIDRES 0.157632 Hz  
AQ 3.1719425 sec  
RG 64  
CW 49.409 usec  
DE 6.50 usec  
TE 303.4 K  
D1 1.0000000 sec  
TD0 1

----- CHANNEL f1 -----  
NUC1 1H  
P1 11.20 usec  
PL1 1.00 dB  
PL1W 18.35641289 W  
RFOL 500.0530800 MHz

F2 - Processing parameters  
SI 32768  
SF 500.0500101 MHz  
NMW MHz  
SSB 0  
LA 0.39 Hz  
GB 0  
PC 1.00

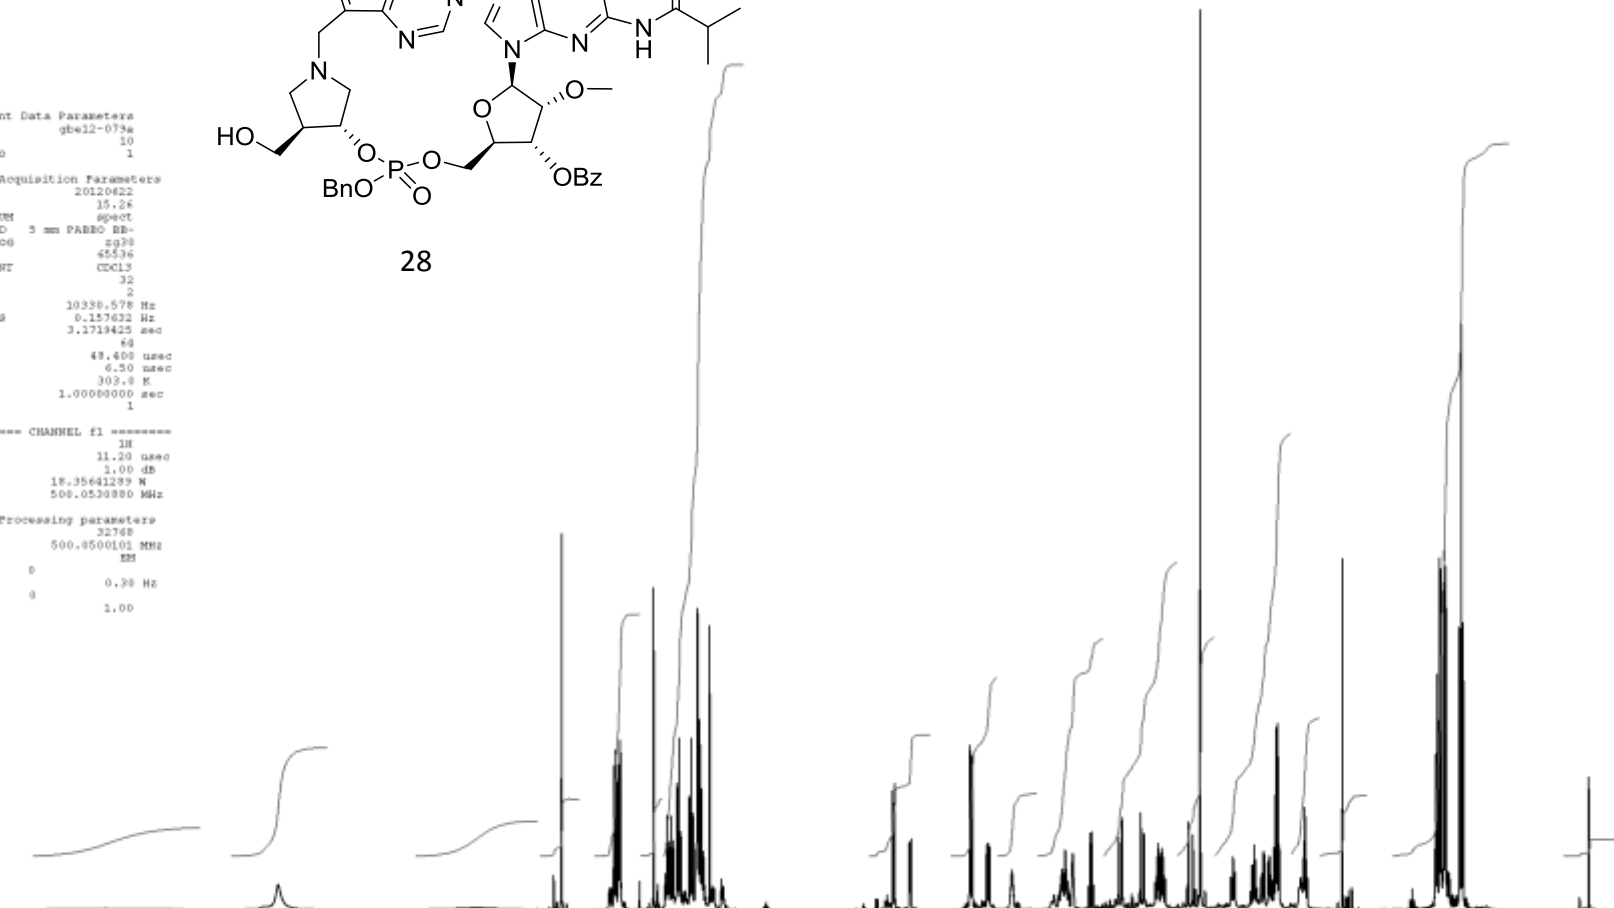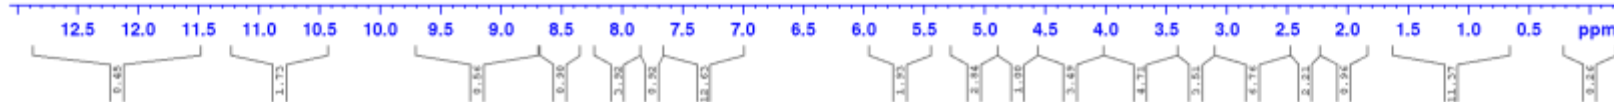

**<sup>13</sup>C NMR  
126 MHz**

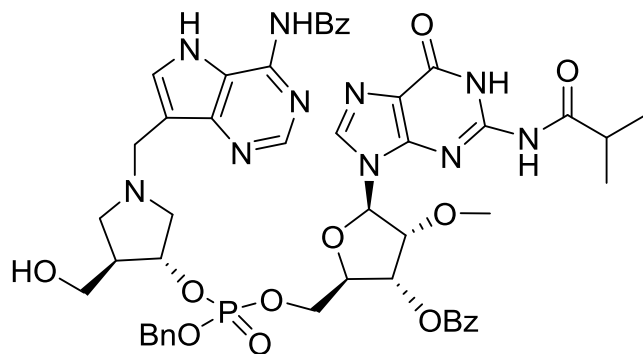

28

```

Current Data Parameters
NAME          sbell-079a
EXPNO         21
PROCNO        1

F2 - Acquisition Parameters
Date_         20120622
Time          22:22
INSTRUM       spect
PROBHD        5 mm PABBO BB-
PULPROG       zgpg30
TD            65536
SOLVENT       cpd13
NS            2400
DS            4
SWH           31250.000 Hz
FIDRES       0.476837 Hz
AQ           1.0485760 sec
RG           2050
DW           18.000 usec
DE           15.08 usec
TE           305.0 K
D3           8.59000000 sec
D11          8.09000000 sec
TEO          1
  
```

```

----- CHANNEL F1 -----
NUC1          13C
P1            9.00 usec
P11           -1.00 dB
P1LW         125.9428884 W
SFO1         125.7508755 MHz
  
```

```

===== CHANNEL F2 =====
CPOPRG2       waltz16
NUC2           1H
PCPD2         80.00 usec
P12           1.00 dB
P1L2         19.98 dB
P1L3         21.10 dB
P13W         18.95441289 W
P1L3W         0.35967363 W
P1L3W         0.17983669 W
SFO2         500.0520002 MHz
  
```

```

F2 - Processing parameters
SI            32768
SF           125.7376730 MHz
MCM           EM
ASB           0
LB            3.00 Hz
GB            0
PC            1.49
  
```

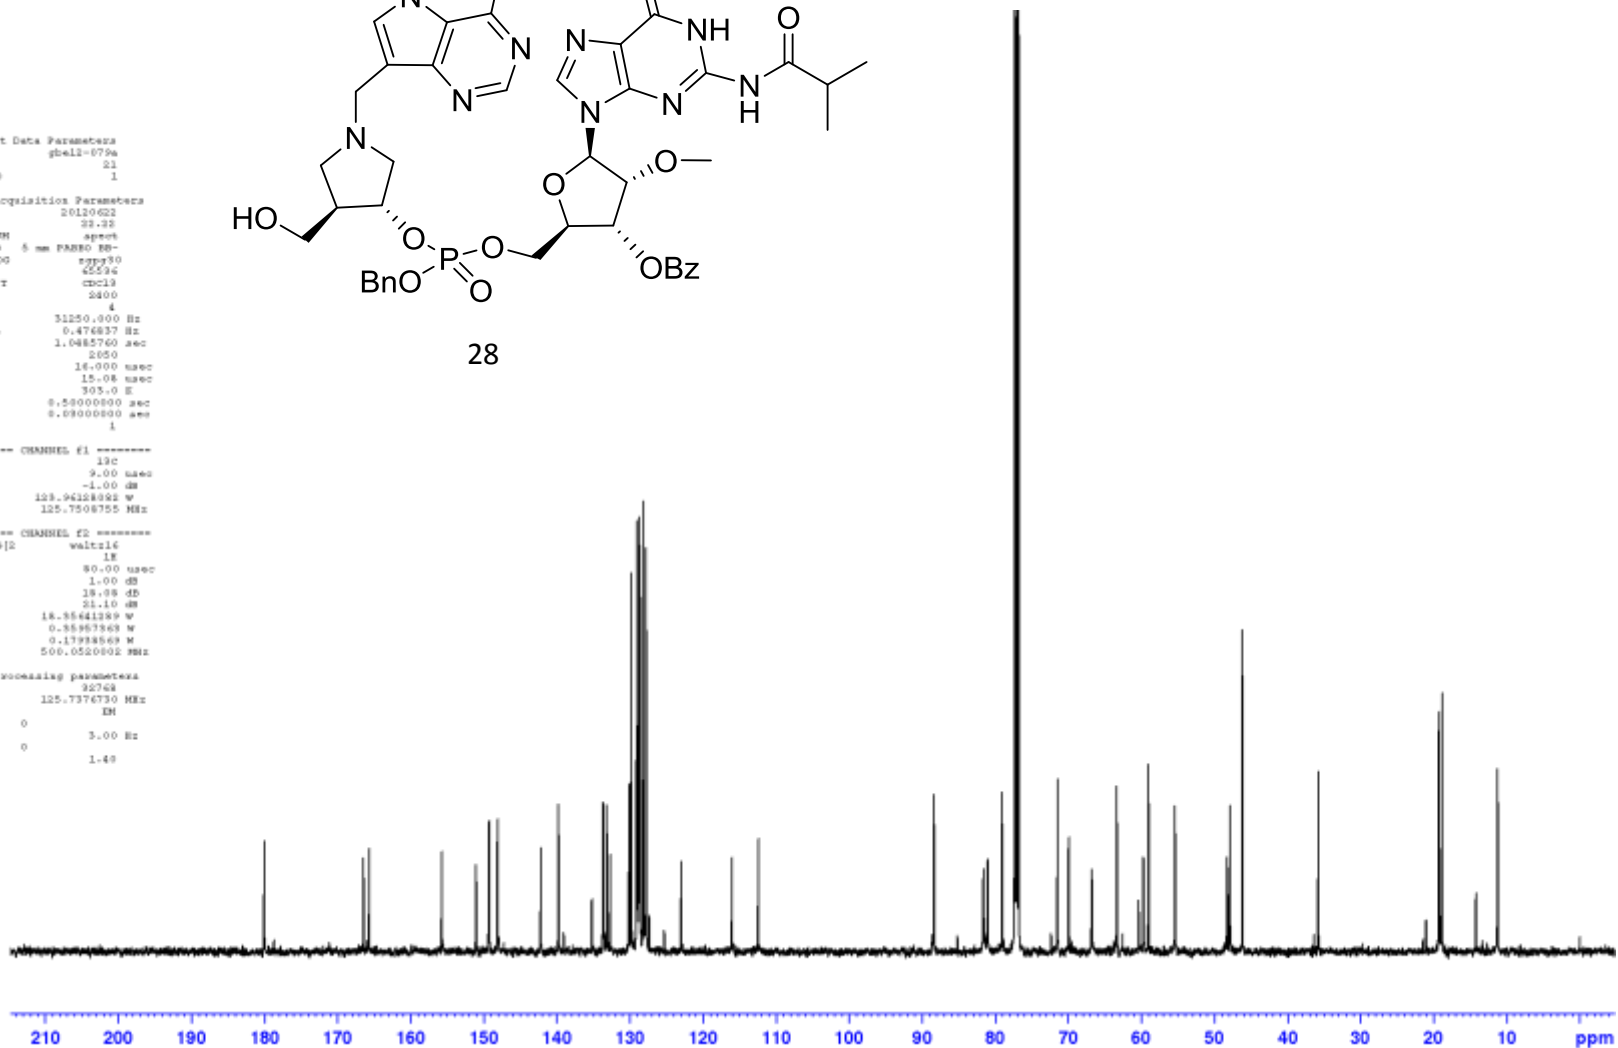

**<sup>31</sup>P NMR  
202 MHz**

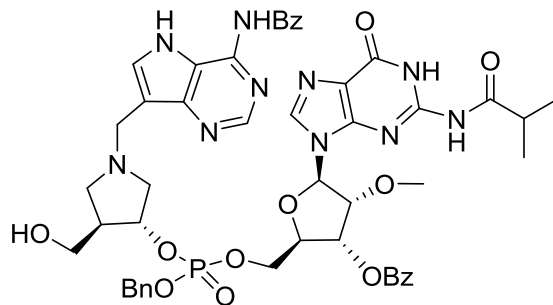

28

```

Current Data Parameters
NAME          g8412-079a
EXPNO        11
PROCNO       1

F2 - Acquisition Parameters
Date_        20120422
Time         15:29
INSTRUM      spect
PROBHD       5 mm PABBO BB-
PULPROG      zgpg30
TD           131072
SOLVENT      CDCl3
NUC1         31P
DS           4
SWH          81521.742 Hz
FIDRES      0.621962 Hz
AQ          0.8039083 sec
RG          2058
DW          6.123 usec
DE          6.50 usec
TE          299.2 K
D1          3.0000000 sec
d11         0.03000000 sec
TE0         1

----- CHANNEL f1 -----
NUC1        31P
P1          18.40 usec
P11         -1.00 dB
P1LM       55.50078523 W
SFO1       202.4340954 MHz

----- CHANNEL f2 -----
CPDPRG2    mltiplc
NUC2        1H
PCPD2      80.80 usec
P12         1.00 dB
P112       19.08 dB
P113       21.10 dB
P12M       18.35641289 W
P112M      0.35907363 W
P113M      0.17948569 W
SFO2       500.0520082 MHz

F2 - Processing parameters
SI          65536
SF          202.4239500 MHz
NCM         324
ZSN         0
IN          3.00 Hz
GB          0
PC          1.40

```

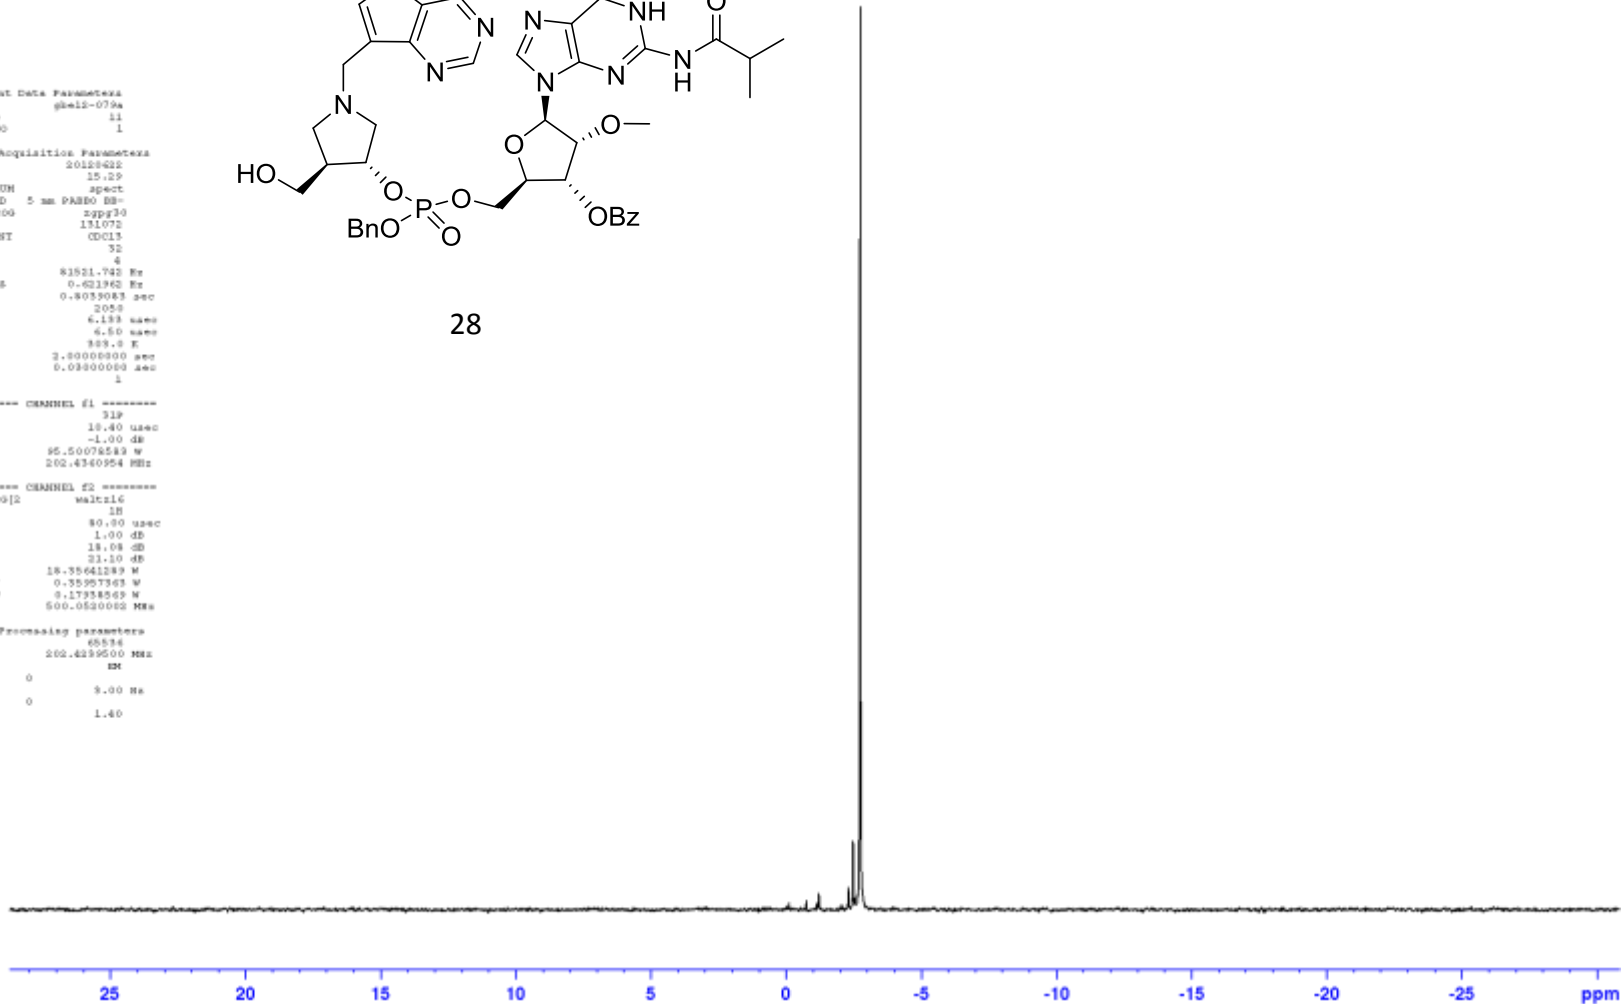





<sup>13</sup>C NMR  
126 MHz

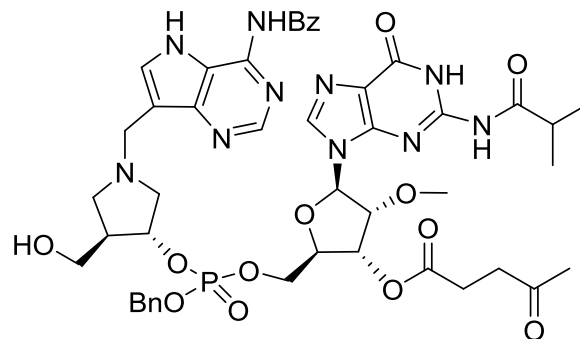

29

Current Data Parameters  
NAME Jmg299  
EXPNO 11  
PROCNO 1

F2 - Acquisition Parameters  
Date\_ 20131216  
Time 18.08  
INSTRUM spect  
PROBHD 5 mm PABBO BB-  
PULPROG zgpg30  
TD 65536  
SOLVENT cdcl3  
NS 2400  
DS 4  
SWH 31256.006 MHz  
FIDRES 6.476927 Hz  
AQ 1.0485766 sec  
RG 71.4  
DM 16.006 usec  
DE 9.08 usec  
TE 303.0 K  
D1 0.50000000 sec  
D11 0.03000000 sec  
TD0 1

----- CHANNEL f1 -----  
SFO1 125.750733 MHz  
NUC1 13C  
P1 9.06 usec  
PL1 123.9599908 W

----- CHANNEL f2 -----  
SFO2 500.9526902 MHz  
NUC2 1H  
CPCPRG2 waltz16  
PCPG2 80.00 usec  
PLM2 18.35600090 W  
PLM12 0.39978001 W  
PLM13 0.23026006 W

F2 - Processing parameters  
SI 32768  
SF 125.7376730 MHz  
NUM 830  
SFR 0  
LB 5.00 Hz  
GB 0  
PC 1.40

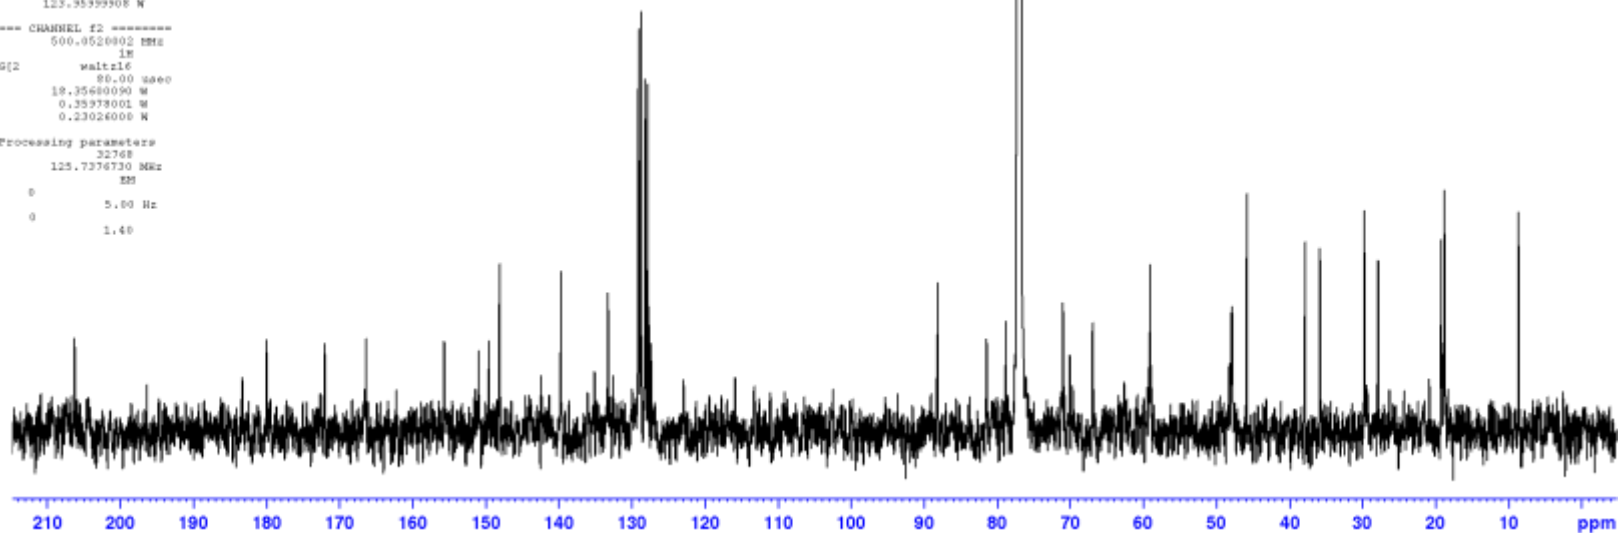

<sup>31</sup>P NMR  
202 MHz

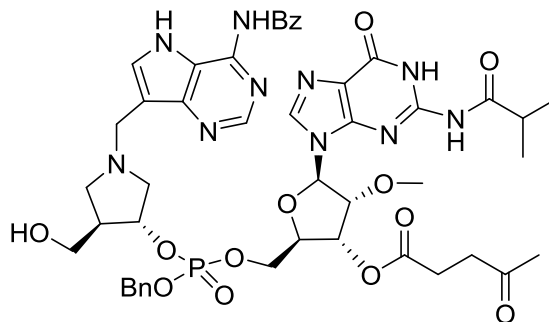

29

CURRENT DATA PARAMETERS  
NAME Jmg299  
EXPNO 10  
PROCNO 1

F2 - Acquisition Parameters  
Date\_ 20131216  
Time 23:57  
INSTRUM spect  
PROBHD 5 mm PARBO BR-  
PULPROG zgpg30  
TD 131072  
SOLVENT cdcl3  
NS 128  
DS 4  
SWH 81521.742 Hz  
FIDRES 0.421962 Hz  
AQ 0.8034083 sec  
RG 2050  
SN 6.132 0000  
DE 6.50 0000  
TE 303.0 K  
D1 2.08000000 sec  
D11 0.03000000 sec  
TD0 1

----- CHANNEL f1 -----  
SFO1 202.4360954 MHz  
NUC1 31P  
P1 18.40 usec  
PL1 35.50099945 W

----- CHANNEL f2 -----  
SFO2 500.852082 MHz  
NUC2 1H  
CPDPRG2 waltz16  
PCPD2 30.00 0000  
PLM2 18.35608098 W  
PLM12 0.35378001 W  
PLM13 0.23926000 W

F2 - Processing parameters  
SI 65536  
SF 202.4239500 MHz  
NUC EM  
SR 0  
LA 3.00 Hz  
GB 0  
PC 1.40

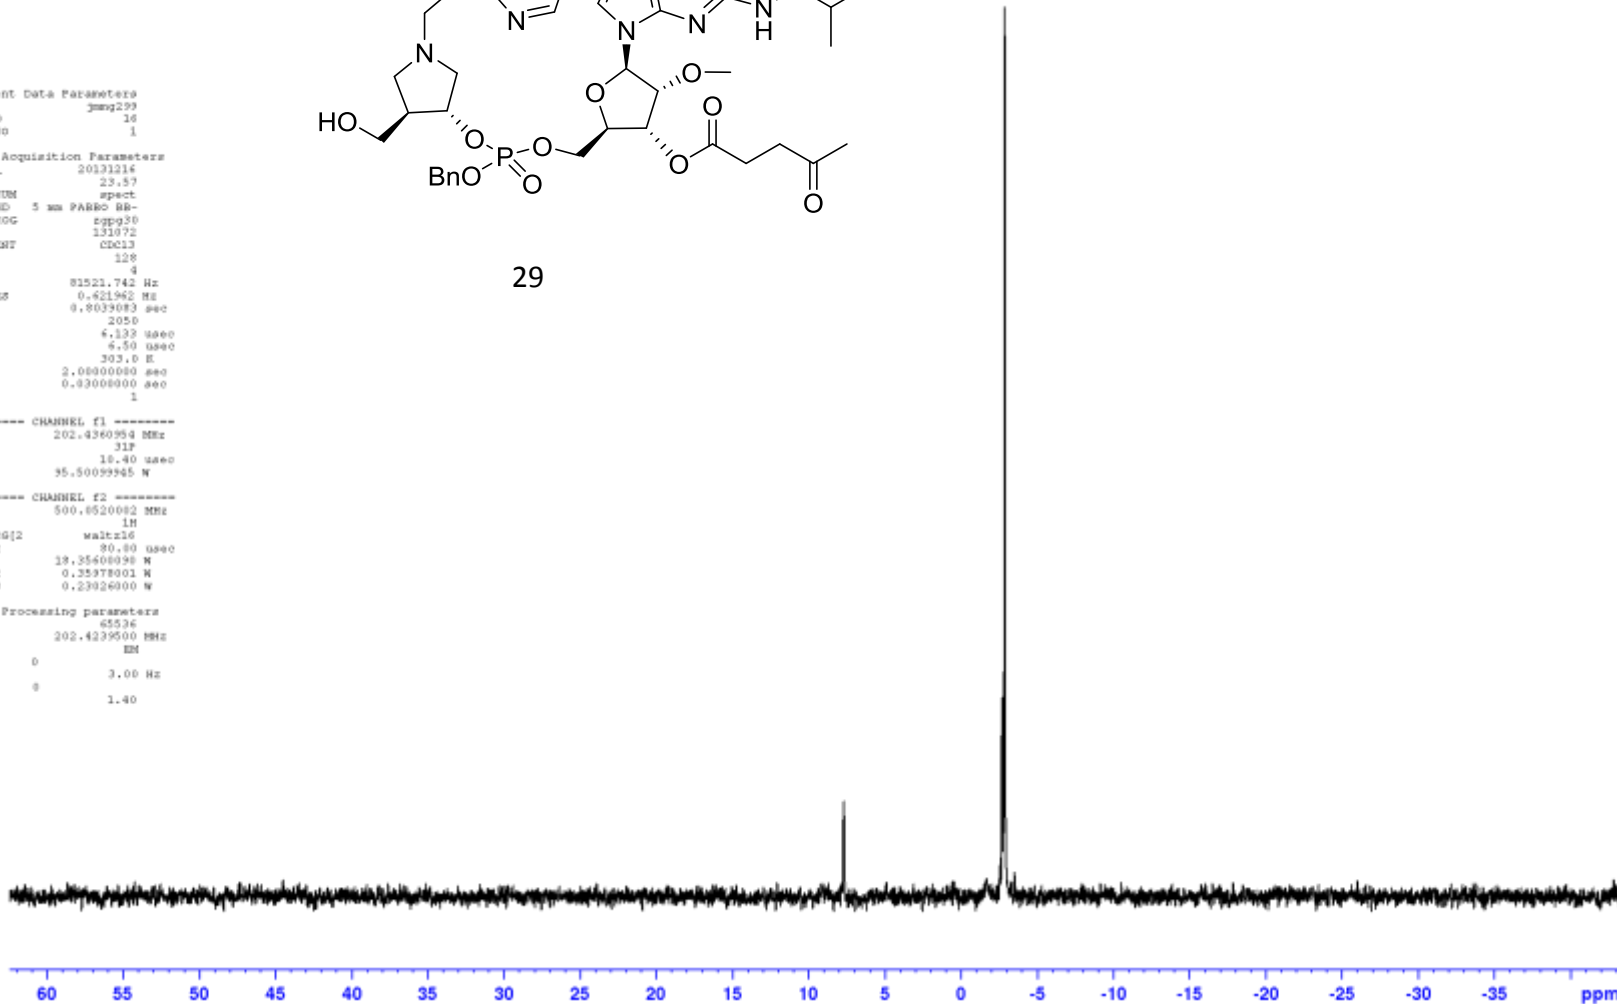

**<sup>1</sup>H NMR  
500 MHz**

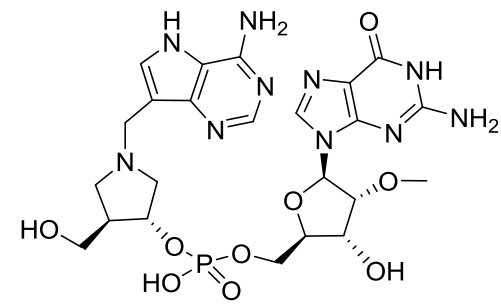

30

Current Data Parameters  
NAME gbel2-081a  
EXPNO 40  
PROCNO 1

F2 - Acquisition Parameters  
Date\_ 20120628  
Time\_ 19.28  
INSTRUM spect  
PROBHD 5 mm FAPBO BS-  
PULPROG zg30  
TD 65536  
SOLVENT D2O  
NS 32  
DS 2  
SWH 10330.578 Hz  
FIDRES 0.157632 Hz  
AQ 3.1719425 sec  
RG 181  
DW 48.400 usec  
DE 6.50 usec  
TE 302.9 K  
D1 1.0000000 sec  
TDO 1

==== CHANNEL f1 =====  
NUC1 1H  
P1 11.20 usec  
PL1 1.00 dB  
PLLW 18.35641289 W  
SFO1 500.0530880 MHz

F2 - Processing parameters  
SI 32768  
SF 500.0499618 MHz  
WDW EM  
SSB 0  
LB 0.30 Hz  
GB 0  
PC 1.00

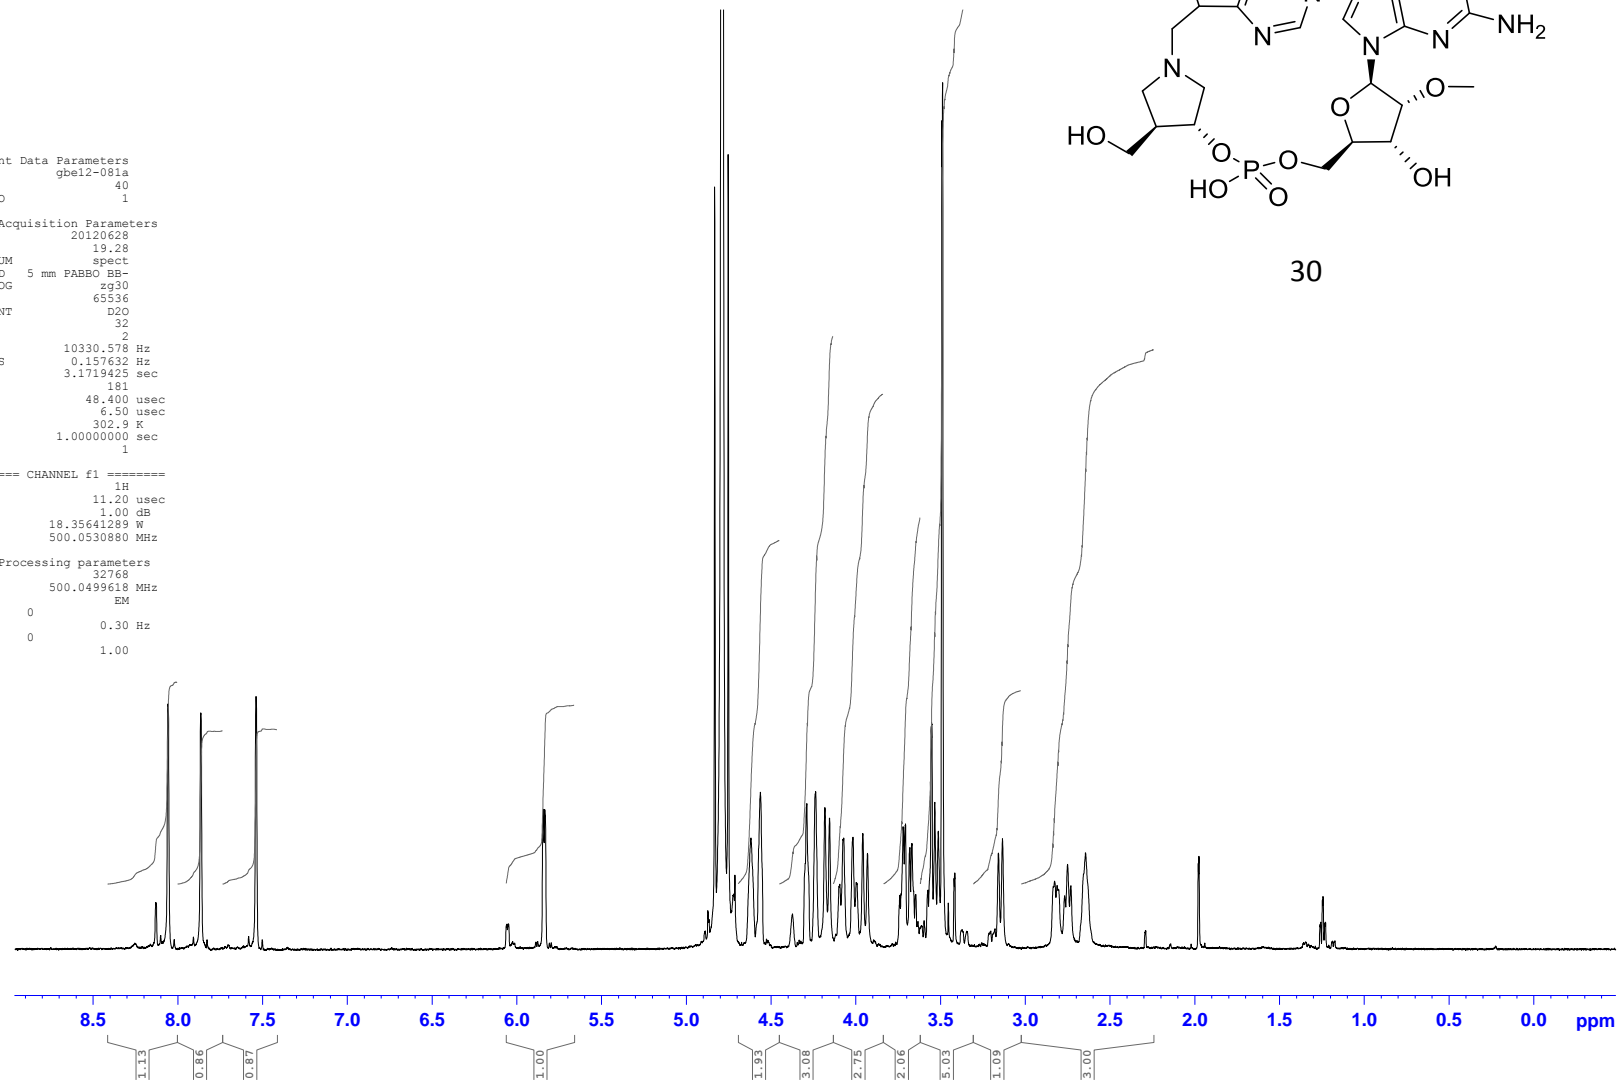

<sup>13</sup>C NMR  
126 MHz

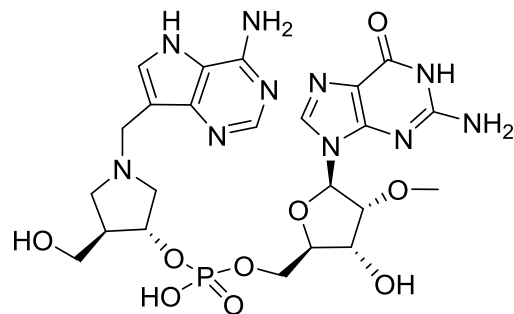

30

```
Current Data Parameters
NAME          gb411-001a
EXPNO         41
PROCNO        1

F2 - Acquisition Parameters
Date_         20120628
Time          21:39
INSTRUM       spect
PROBHD        5 mm PABBO BB-
PULPROG       zgpg30
TD            65536
SOLVENT       D2O
NS            4880
DS            4
SWH           31250.000 Hz
FIDRES       0.476837 Hz
AQ           1.0485760 sec
RG           2050
DW           18.000 usec
DE           15.08 usec
TE           305.0 K
D3           8.58000000 sec
D11          8.09000000 sec
TEO          1

----- CHANNEL f1 -----
NUC1          13C
P1            9.00 usec
P11           -1.00 dB
P11M         128.9428884 W
SFO1         125.7506755 MHz

***** CHANNEL f2 *****
CPDPRG2      waltz16
NUC2          1H
PCPD2        80.00 usec
P12           1.00 dB
P112         19.98 dB
P113         21.10 dB
P12M         18.95441289 W
P112M        0.35867363 W
P113M        0.17983669 W
SFO2         500.0520002 MHz

F2 - Processing parameters
SI            32768
SF           125.7376730 MHz
MCW          EM
ASB          0
LB           3.00 Hz
GB          0
PC           1.49
```

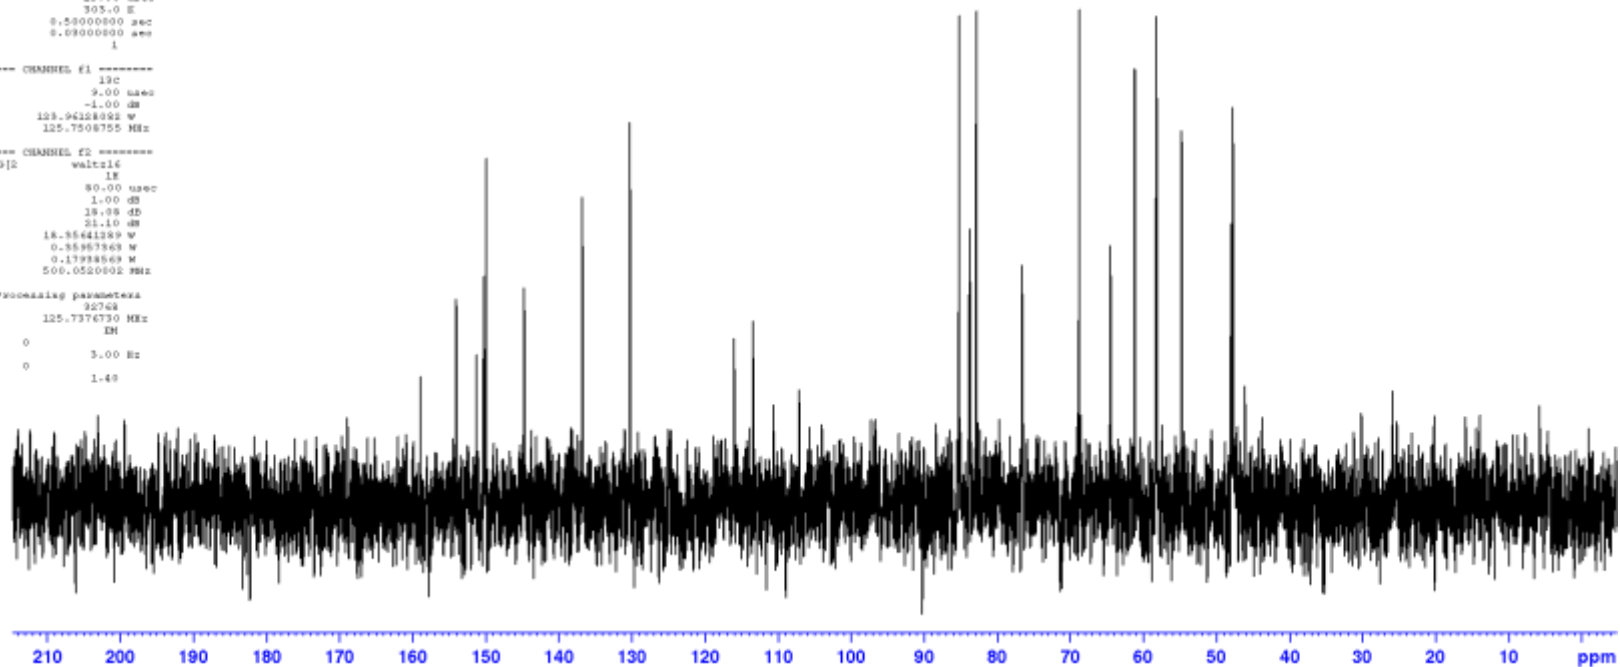

**<sup>31</sup>P NMR  
202 MHz**

```
Current Data Parameters
NAME      gbl12-011a
EXPNO     32
PROCNO    1

F2 - Acquisition Parameters
Date_     20120428
Time      15:49
INSTRUM   spect
PROBHD    5 mm PABBO BB-
PULPROG   zgpg30
TD        131072
SOLVENT   D2O
HG        32
DS        4
SWH       81921.742 Hz
FIDRES    0.621962 Hz
AQ        0.8039083 sec
RG        2058
DW        6.123 usec
DE        6.50 usec
TE        300.2 K
D1        3.0000000 sec
d11       0.03000000 sec
TE0       1

===== CHANNEL f1 =====
NUC1      31P
P1        18.40 usec
P11       -1.00 dB
P1LM      55.50078523 W
SFO1      202.4340954 MHz

===== CHANNEL f2 =====
CHOPPRG2  mlticlic
NUC2      1H
PCPD2     80.00 usec
P12       1.00 dB
P112      19.08 dB
P113      21.10 dB
P12M      18.35641289 W
P112M     0.35907363 W
P113M     0.17384569 W
SFO2      500.0520082 MHz

F2 - Processing parameters
SI        65536
SF        202.4239500 MHz
NCM       324
ZSN       0
LB        3.00 Hz
GB        0
PC        1.40
```

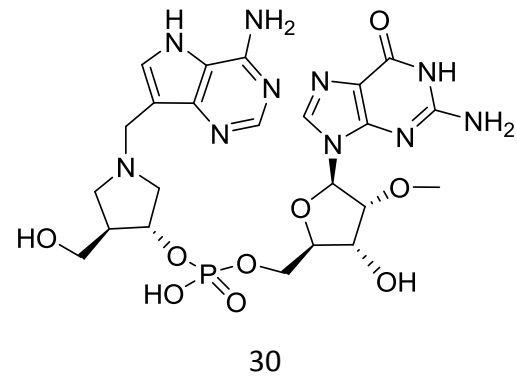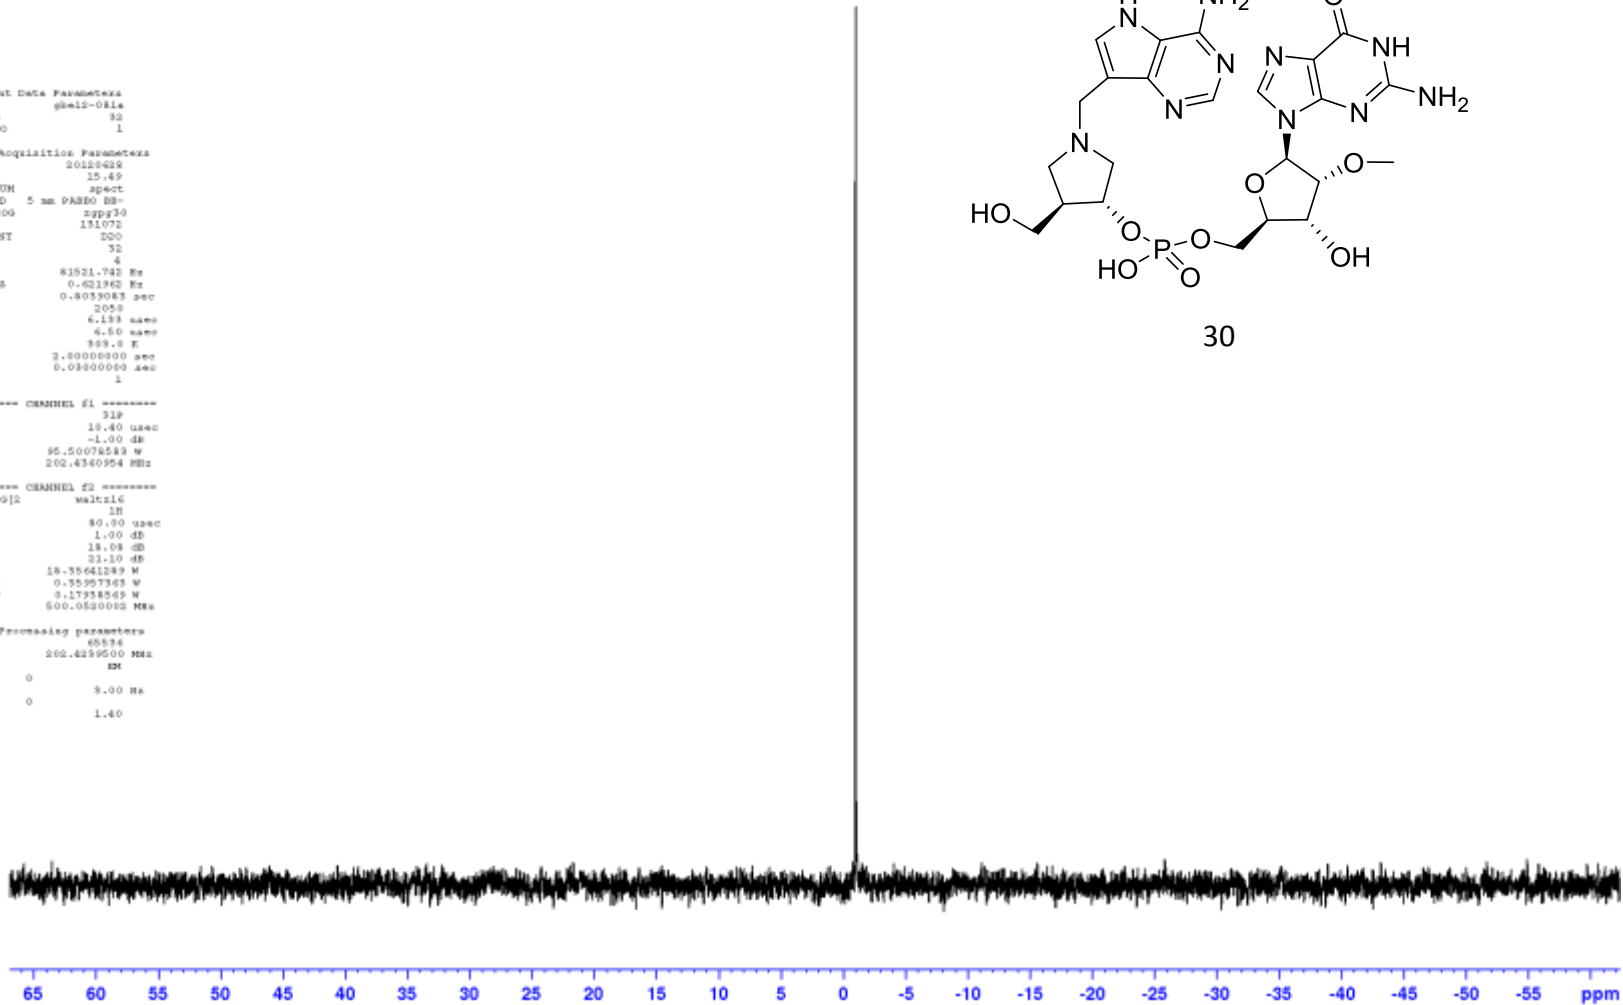

# HPLC

Data File F:\LC04\DATA\2012-2013\JMM\26SEP12 2012-09-26 11:49:56\043-0301.D  
 Sample Name: GBE12-081A

```

=====
Acq. Operator   : JMM                      Seq. Line :    3
Acq. Instrument : Instrument 1              Location  : Vial 43
Injection Date  : 26/09/2012 12:41:59 p.m. Inj       :    1
                                           Inj Volume: 5.000 µl

Acq. Method    : I:\SHARED\INSTRUMENT DATA\HPLC AGILENT AG03\CURRENT\JMM\26SEP12 2012-09-26
                                           11-49-56\JMMUPNUCLEO.M
Last changed   : 26/09/2012 11:49:56 a.m. by JMM
Analysis Method: F:\LC04\METHODS\BJC\BJC WATER_35_ACN_65_20MIN_PORT1_2_F0_4.M
Last changed   : 9/05/2016 9:50:38 p.m. by K35
  
```

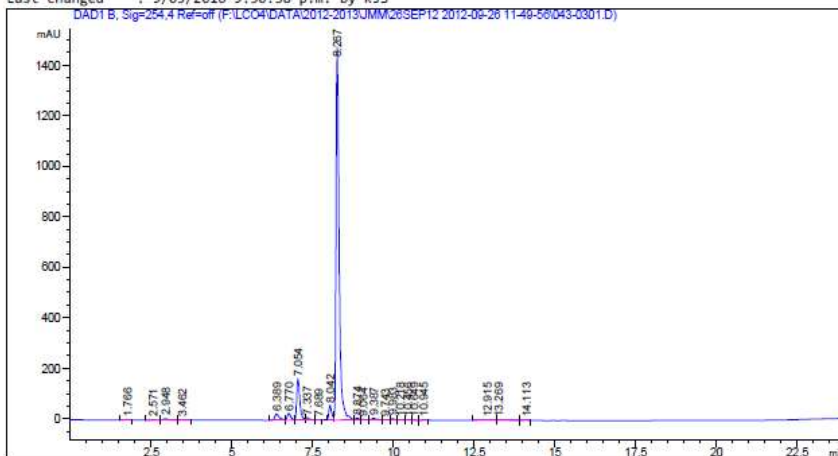

## Area Percent Report

```

Sorted By      : Signal
Multiplier    : 1.0000
Dilution      : 1.0000
Use Multiplier & Dilution Factor with ISTDs
  
```

Signal 1: DAD1 B, Sig=254,4 Ref=off

| Peak # | RetTime [min] | Type | Width [min] | Area [mAU*s] | Height [mAU] | Area % |
|--------|---------------|------|-------------|--------------|--------------|--------|
| 1      | 1.766         | BB   | 0.1508      | 21.02695     | 2.06486      | 0.1709 |
| 2      | 2.571         | BV   | 0.1989      | 28.32448     | 1.95675      | 0.2303 |
| 3      | 2.948         | VV   | 0.1724      | 66.55742     | 5.61151      | 0.5411 |
| 4      | 3.462         | VB   | 0.1696      | 11.94811     | 1.02821      | 0.0971 |
| 5      | 6.389         | BV   | 0.1487      | 247.54503    | 24.32026     | 2.0125 |
| 6      | 6.770         | VV   | 0.1199      | 208.30351    | 26.44160     | 1.6934 |
| 7      | 7.054         | VV   | 0.0990      | 1066.28943   | 161.51305    | 8.6686 |
| 8      | 7.337         | VB   | 0.0989      | 69.69309     | 10.05455     | 0.5666 |

Data File F:\LC04\DATA\2012-2013\JMM\26SEP12 2012-09-26 11:49:56\043-0301.D  
 Sample Name: GBE12-081A

| Peak # | RetTime [min] | Type | Width [min] | Area [mAU*s] | Height [mAU] | Area %  |
|--------|---------------|------|-------------|--------------|--------------|---------|
| 9      | 7.689         | BB   | 0.0877      | 7.71522      | 1.29207      | 0.0627  |
| 10     | 8.042         | BV   | 0.0944      | 351.13345    | 56.57267     | 2.8546  |
| 11     | 8.267         | VV   | 0.1003      | 9912.06035   | 1476.09753   | 80.5881 |
| 12     | 8.874         | VV   | 0.0956      | 54.42223     | 8.17696      | 0.4424  |
| 13     | 9.064         | VB   | 0.0948      | 12.02891     | 1.82814      | 0.0978  |
| 14     | 9.387         | BV   | 0.1509      | 64.74667     | 6.35444      | 0.5264  |
| 15     | 9.743         | VV   | 0.1210      | 12.27727     | 1.53048      | 0.0998  |
| 16     | 9.983         | VB   | 0.0862      | 32.44338     | 5.71796      | 0.2638  |
| 17     | 10.218        | BV   | 0.1062      | 8.43718      | 1.19744      | 0.0686  |
| 18     | 10.456        | VV   | 0.1046      | 9.89900      | 1.50790      | 0.0805  |
| 19     | 10.649        | VB   | 0.0821      | 8.47933      | 1.59250      | 0.0689  |
| 20     | 10.945        | BB   | 0.1041      | 17.04811     | 2.73794      | 0.1451  |
| 21     | 12.915        | BV   | 0.3274      | 45.36571     | 1.06748      | 0.3688  |
| 22     | 13.269        | VB   | 0.2343      | 31.00834     | 1.68778      | 0.2521  |
| 23     | 14.113        | BB   | 0.1536      | 12.30021     | 1.35933      | 0.1000  |

Totals : 1.23007e4 1802.52039

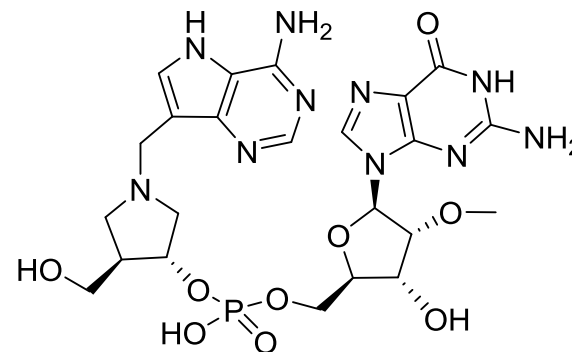

30

<sup>1</sup>H NMR  
500 MHz

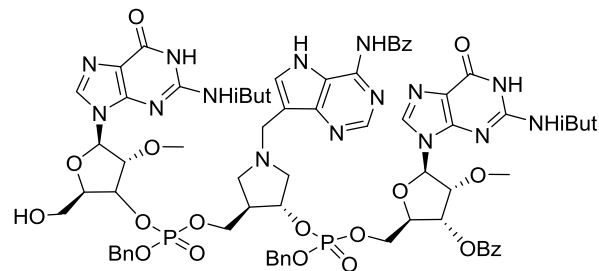

31

Current Data Parameters  
NAME ptgl107  
EXPNO 10  
PROCNO 1

F2 - Acquisition Parameters  
Date\_ 20120718  
Time 17.28  
INSTRUM spect  
PROBHD 5 mm PABBO BB-  
PULPROG zgpg30  
TD 45536  
SOLVENT CDCl3  
NS 32  
DS 2  
SWH 10336.578 Hz  
FIDRES 0.157632 Hz  
AQ 3.1719425 sec  
RG 57  
CW 49.409 usec  
DE 6.50 usec  
TE 303.2 K  
D1 1.0000000 sec  
TDO 1

----- CHANNEL f1 -----  
NUC1 1H  
P1 11.20 usec  
PL1 1.00 dB  
PL1W 18.35641289 W  
RFOL 500.0530880 MHz

F2 - Processing parameters  
SI 32768  
SF 500.0500936 MHz  
NRM RM  
SFO 0  
LA 0 0.39 Hz  
GB 0  
PC 1.00

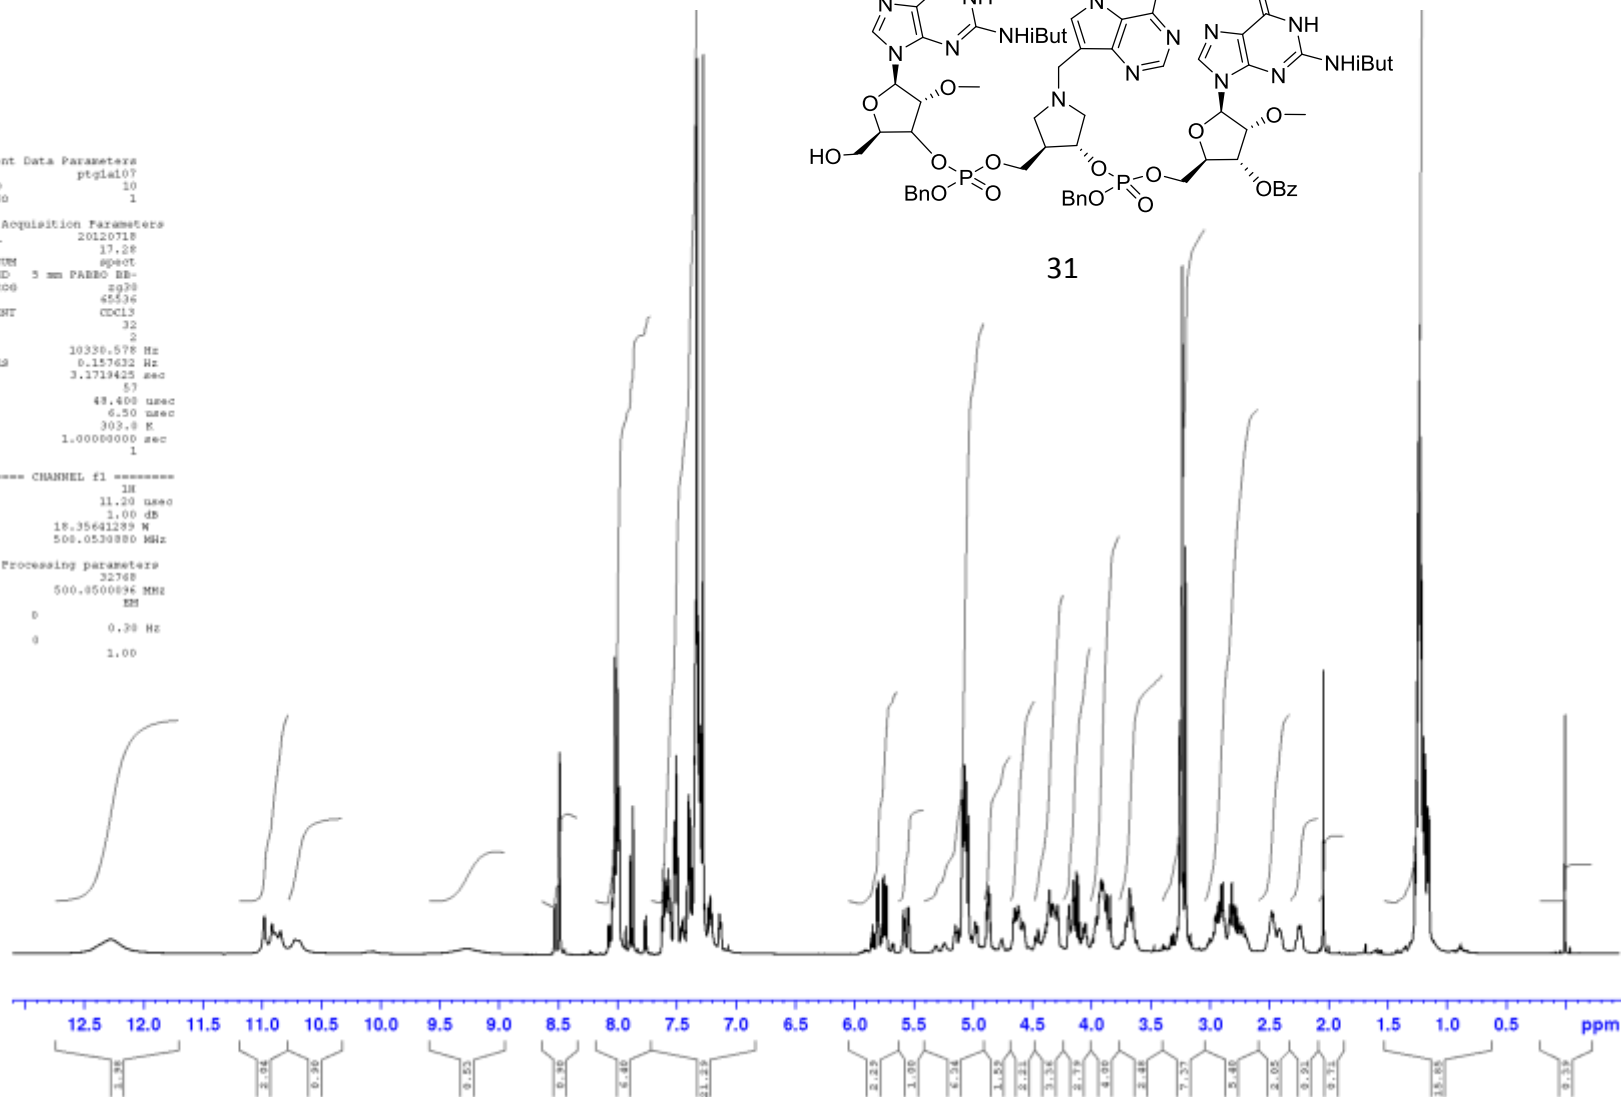

$^{13}\text{C}$  NMR  
126 MHz

```
Current Data Parameters
NAME      ptgl107
EXPNO    11
PROCNO   1

F2 - Acquisition Parameters
Date_    20120718
Time     18.34
INSTRUM  spect
PROBHD   5 mm PABBO BB-
PULPROG  zgpg30
TD       65536
SOLVENT  cpd13
NS       2400
DS       4
SWH      31250.000 Hz
FIDRES   0.476837 Hz
AQ       1.0485760 sec
RG       144
DM       16.000 usec
DE       15.08 usec
TE       305.0 K
D3       8.58000000 sec
D11      8.09000000 sec
TE0      1

----- CHANNEL f1 -----
NUC1     13C
P1       9.00 usec
P11      -1.00 dB
P11W     128.9412884 W
SFO1     125.7506755 MHz

***** CHANNEL f2 *****
CPOPRG12 waltz16
NUC2     1H
PCPD2    80.00 usec
P12      1.00 dB
P112     19.98 dB
P113     21.10 dB
P12W     18.95441289 W
P112W    0.35967363 W
P113W    0.17983669 W
SFO2     500.0520002 MHz

F2 - Processing parameters
SI       32768
SF       125.7376730 MHz
MCM      EM
ASB      0
LB       3.00 Hz
GB       0
PC       1.49
```

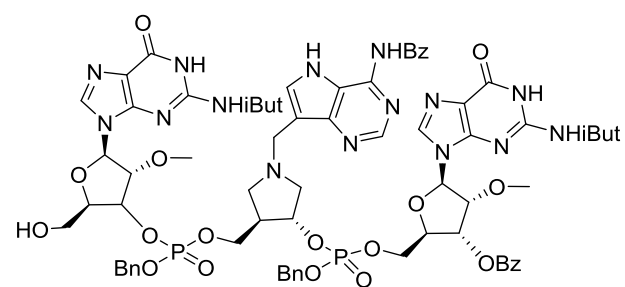

31

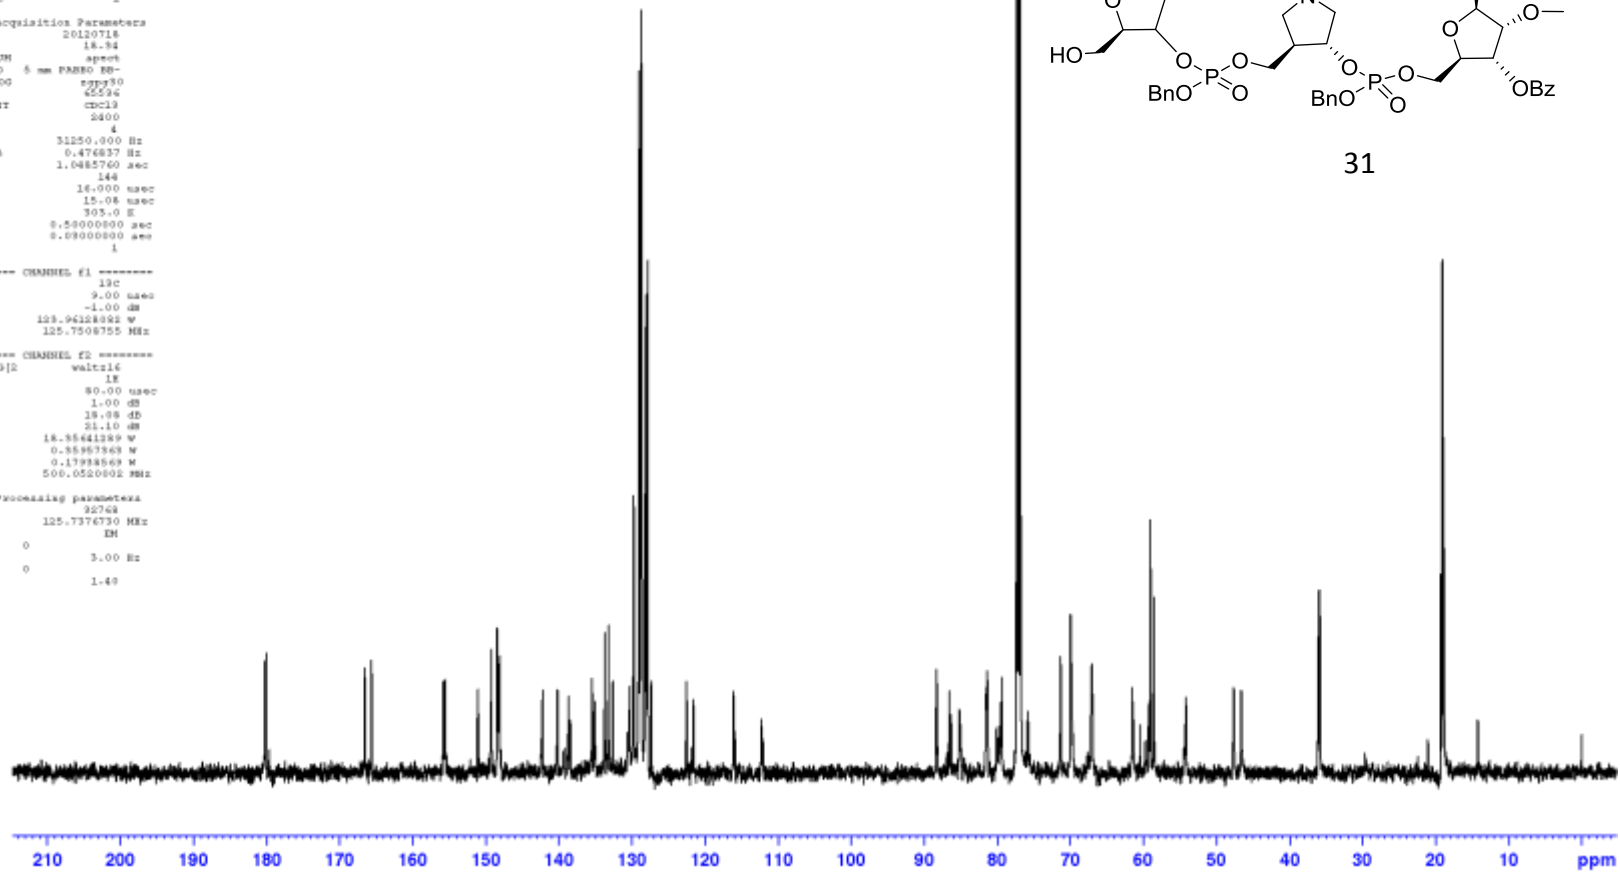





**<sup>13</sup>C NMR**  
**126 MHz**

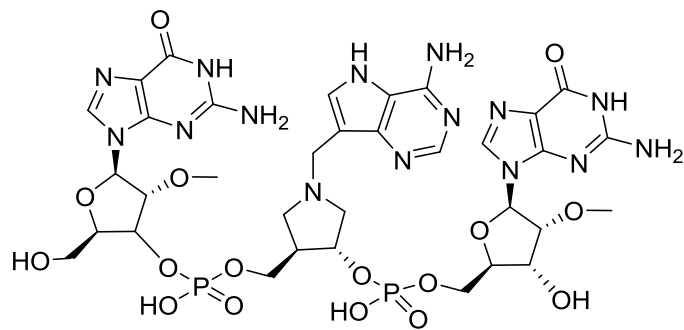

32

```
Current Data Parameters
NAME      pt1a109a
EXPNO    11
PROCNO    1

F2 - Acquisition Parameters
Date_     20120727
Time      22:10
INSTRUM   spect
PROBHD    5 mm PABBO D5-
PULPROG   zgpg30
TD         65536
SOLVENT   D2O
NS         4800
DS         4
SWH        31250.000 Hz
FIDRES     0.476497 Hz
AQ         1.0488748 sec
RG         2058
DW         16.800 usec
DE         10.00 usec
TE         303.2 K
D1         0.50000000 sec
D11        0.03000000 sec
TDO        1

===== CHANNEL f1 =====
NUC1       13C
P1         11.20 usec
P1L        5.00 dB
P1LM       34.39441299 W
SFO1       125.6390648 MHz

===== CHANNEL f2 =====
CPDPRG2    waltz16
NUC2       1H
PCPD2      80.00 usec
P2         -7.00 dB
P2L        14.39 dB
P2LM       39.55579948 W
SFO2       499.8419994 MHz

F2 - Processing parameters
SI         32768
SF         125.6348600 MHz
RG         328
SSB        0
LB         5.00 Hz
GB         0
PC         1.40
```

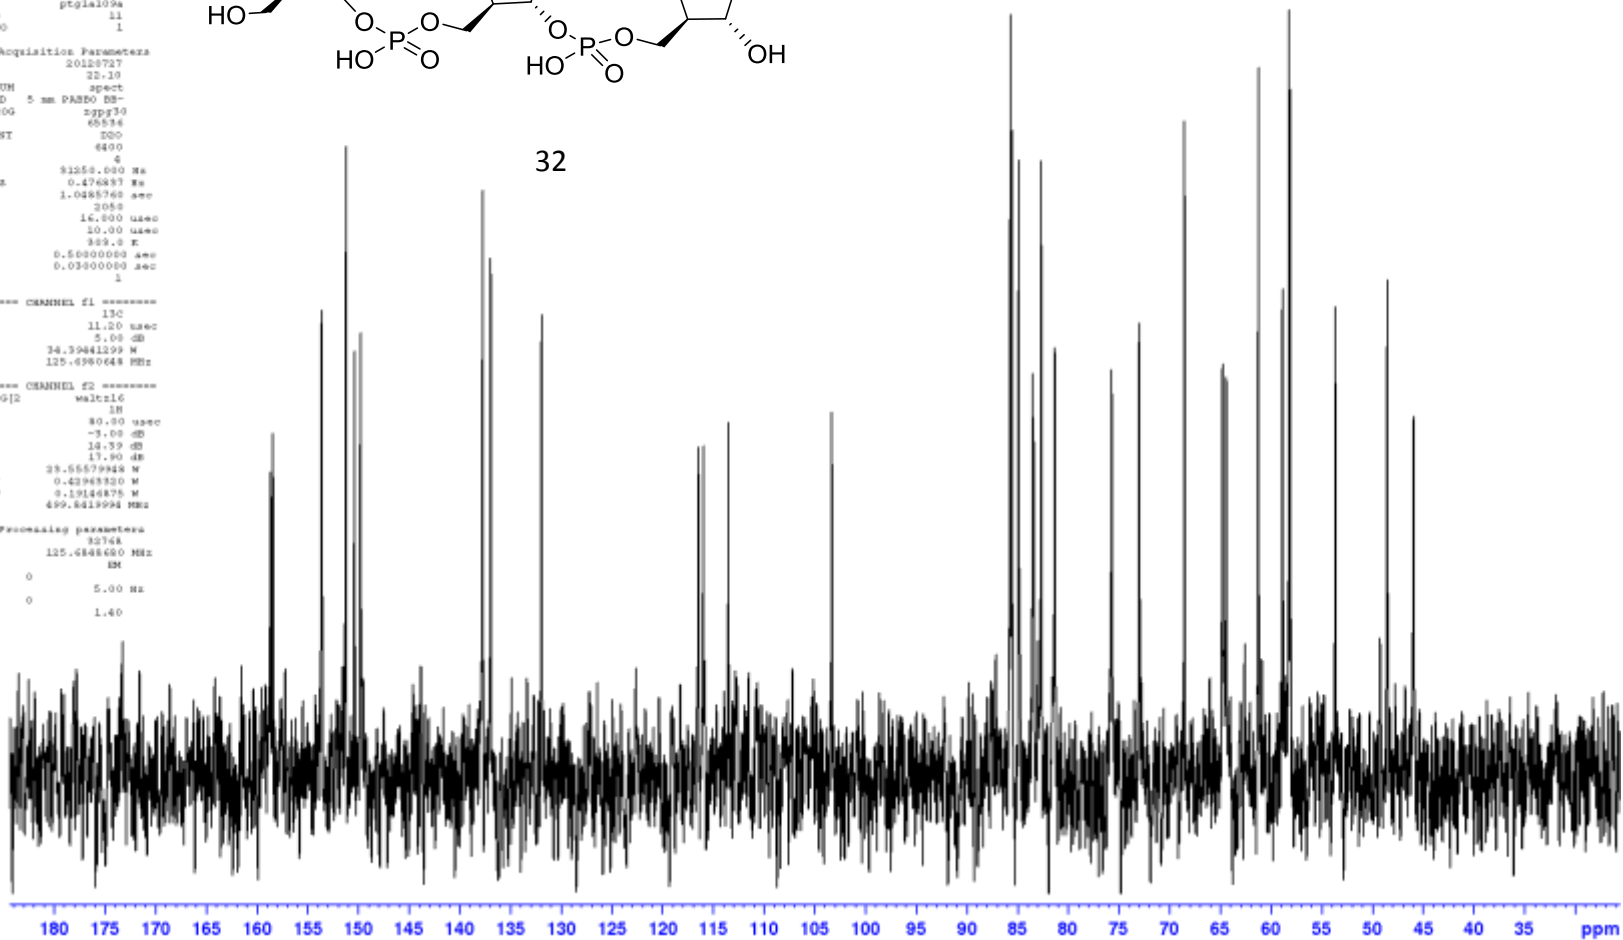

**<sup>31</sup>P NMR**  
**202 MHz**

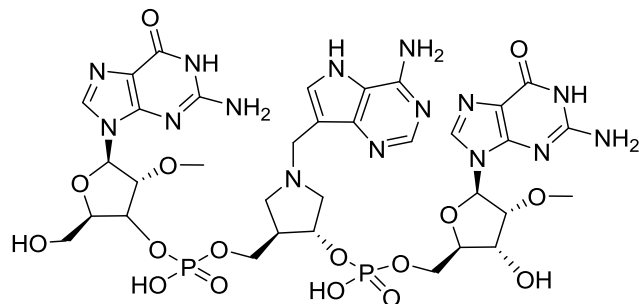

32

Current Data Parameters  
NAME ptglal09a  
EXPNO 14  
PROCNO 1  
  
F2 - Acquisition Parameters  
Date\_ 20120724  
Time 0.11  
INSTRUM spect  
PROBHD 5 mm PABBO BB-  
PULPROG zgpg30  
TD 131072  
SOLVENT D2O  
NS 160  
DS 4  
SWH 61521.742 Hz  
FIDRES 0.621962 Hz  
AQ 0.8039083 sec  
RG 2500  
DW 6.133 usec  
DE 10.00 usec  
IE 305.0 E  
D3 2.00000000 sec  
D11 0.09000000 sec  
TEO 1

----- CHANNEL F1 -----  
NUC1 <sup>31</sup>P  
P1 20.30 usec  
P11 9.30 dB  
P1M 56.99985257 W  
SFO1 202.3510888 MHz

\*\*\*\*\* CHANNEL F2 \*\*\*\*\*  
CHOPPR12 waltz16  
NUC2 <sup>13</sup>C  
PCPD2 80.00 usec  
P12 -3.30 dB  
P112 14.39 dB  
P113 17.80 dB  
P1M 29.65579928 W  
P11M 0.43968320 W  
P11M 0.19136875 W  
SFO2 499.8419994 MHz

F2 - Processing parameters  
SI 65594  
SF 202.3519410 MHz  
MEM 1M  
SAB 0  
LB 5.00 Hz  
GB 0  
PC 1.43

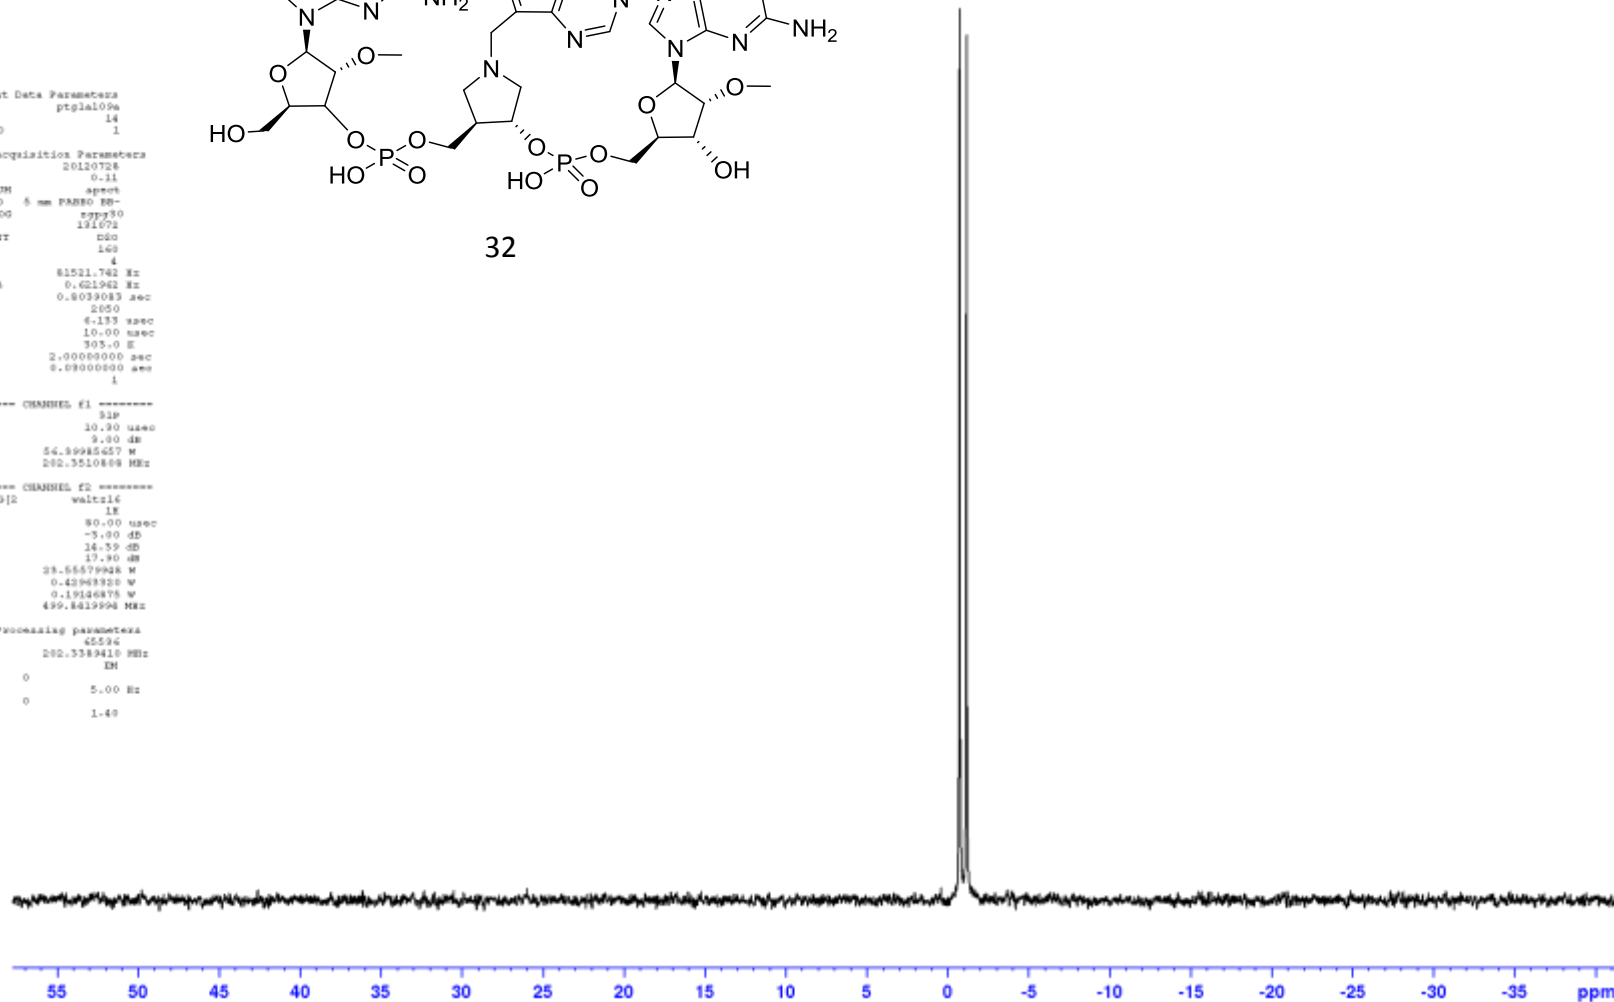

# HPLC

Data File F:\LC04\DATA\2012-2013\JMM\26SEP12 2012-09-26 11-49-56\043-0301.D  
 Sample Name: GBE12-081A

```

=====
Acq. Operator   : JMM                      Seq. Line : 3
Acq. Instrument : Instrument 1              Location  : Vial 43
Injection Date  : 26/09/2012 12:41:59 p.m. Inj       : 1
                                           Inj Volume: 5.000 µl

Acq. Method    : I:\SHARED\INSTRUMENT DATA\HPLC AGILENT AG03\CURRENT\JMM\26SEP12 2012-09-26
                                           11-49-56\JMMUPNUCLEO.M
Last changed   : 26/09/2012 11:49:56 a.m. by JMM
Analysis Method : F:\LC04\METHODS\BJC\BJC WATER_35_ACN_65_20MIN_PORT1_2 F0_4.M
Last changed   : 9/05/2016 9:50:38 p.m. by KJS
  
```

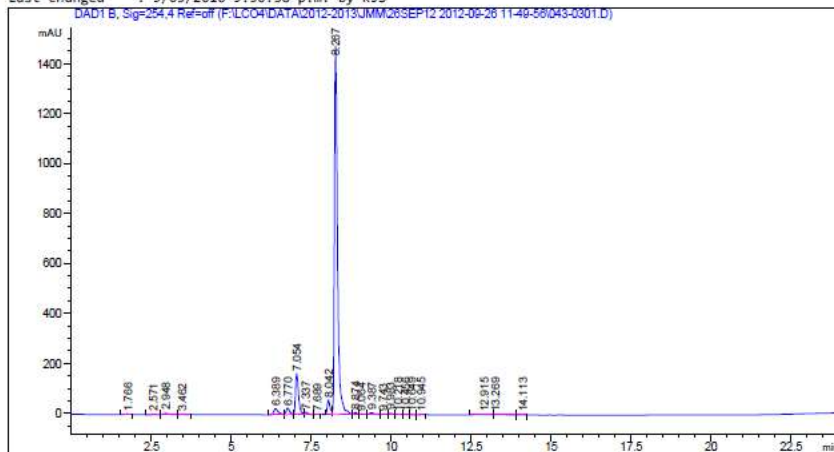

**<sup>1</sup>H NMR  
500 MHz**

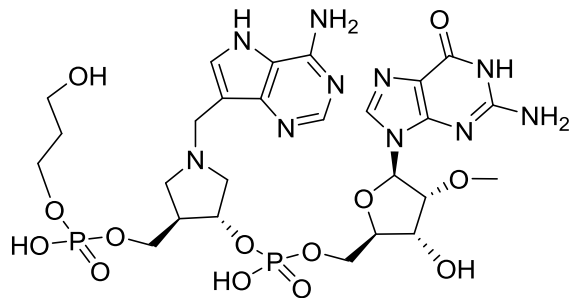

33

Current Data Parameters  
 NAME jmmg304  
 EXPNO 20  
 PROCNO 1  
 F2 - Acquisition Parameters  
 Date\_ 20140130  
 Time 17.35  
 INSTRUM spect  
 PROBDH 5 mm PABBO BB-  
 PULPROG zg30  
 TD 65536  
 SOLVENT D2O  
 NS 160  
 DS 2  
 SWH 10330.578 Hz  
 FIDRES 0.157632 Hz  
 AQ 3.1719425 sec  
 RG 101  
 DW 48.400 usec  
 DE 6.50 usec  
 TE 303.0 K  
 DI 1.0000000 sec  
 TDO 1

==== CHANNEL f1 =====  
 SFOL 500.0530880 MHz  
 NUCL 1H  
 P1 11.20 usec  
 PLWL 18.35600090 W  
 F2 - Processing parameters  
 SI 32768  
 SF 500.0499560 MHz  
 WDW EM  
 SSB 0  
 LB 0.30 Hz  
 GB 0  
 PC 1.00

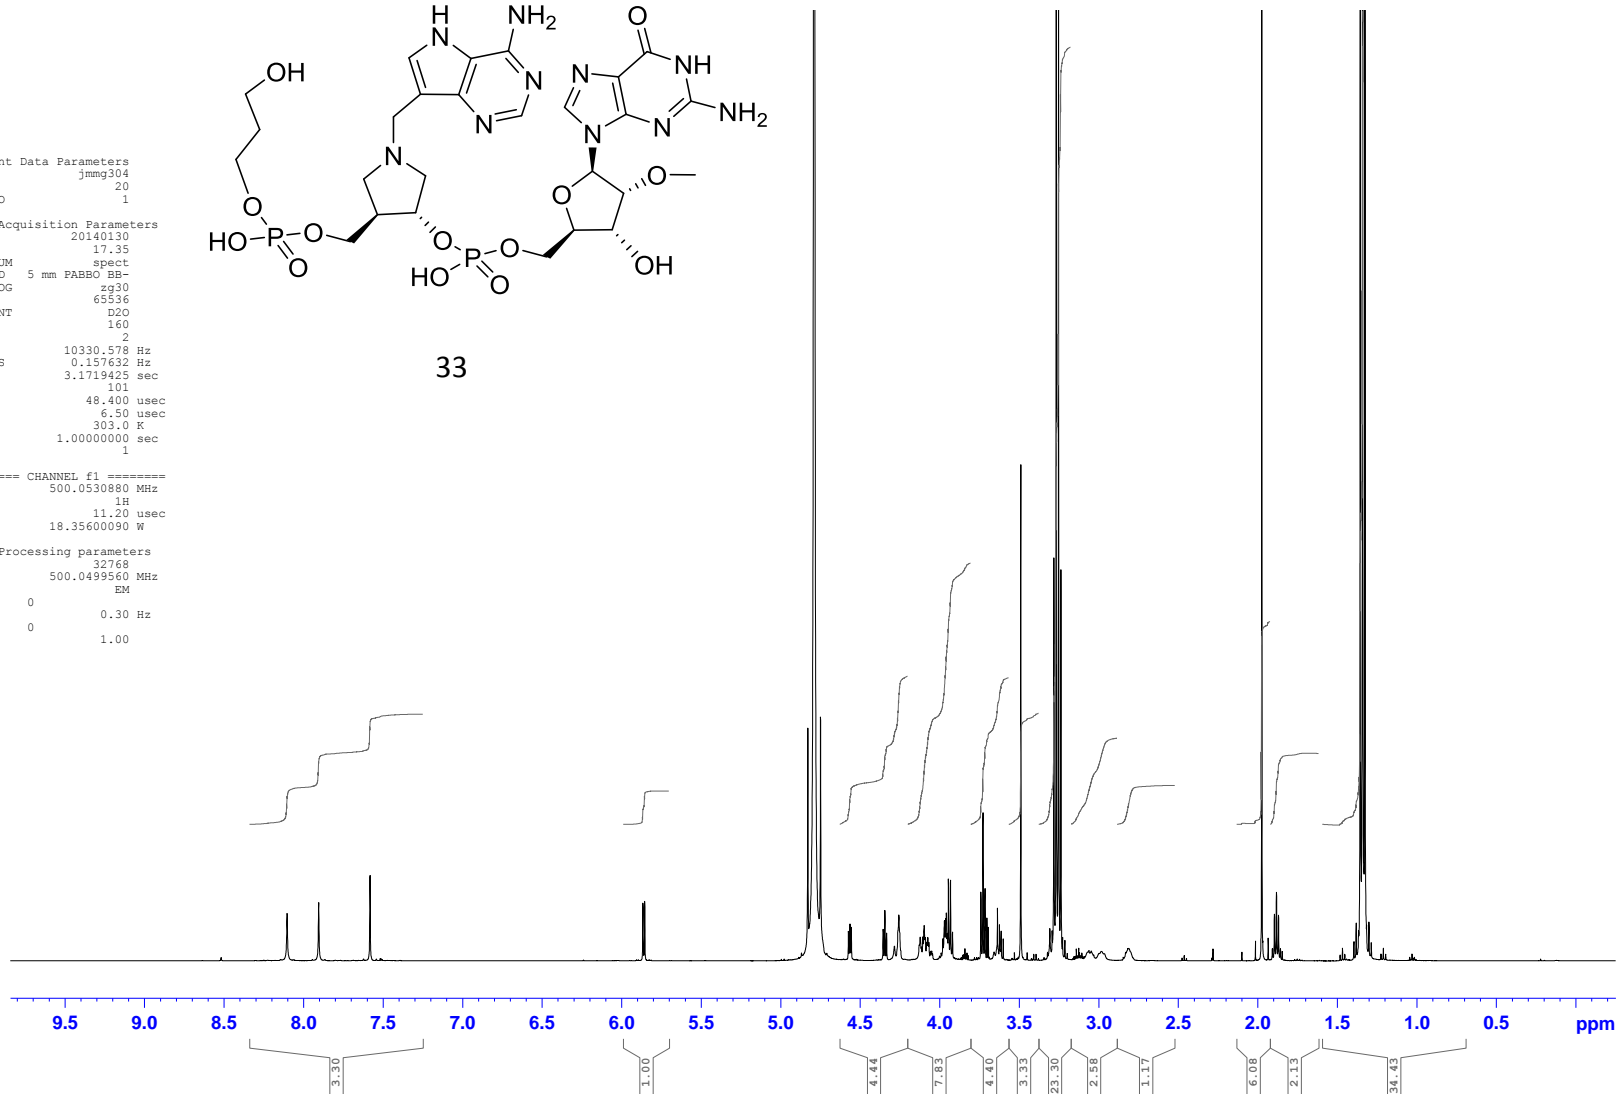

**<sup>13</sup>C NMR  
126 MHz**

```

Current Data Parameters
NAME      Jmg304
EXPNO    21
PROCNO    1

F2 - Acquisition Parameters
Date_     20140130
Time      19.17
INSTRUM   spect
PROBHD    5 mm PABBO BB-
PULPROG   zgpg30
TD         65536
SOLVENT   D2O
NS         7200
DS         4
SWH        31256.006 MHz
FIDRES     0.476827 Hz
AQ         1.0485766 sec
RG         64
DM         16.006 usec
DE         9.08 usec
TE         303.0 K
D1         0.50000000 sec
D11        0.03000000 sec
TD0        1
  
```

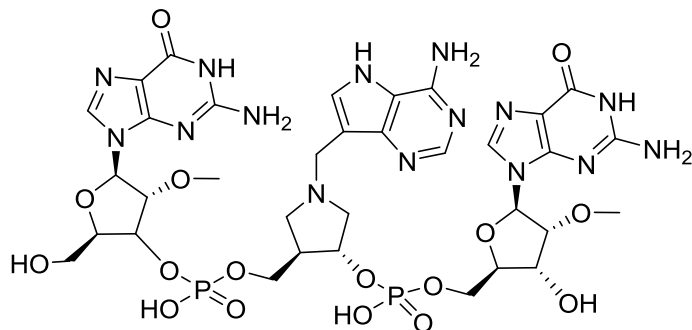

33

```

----- CHANNEL f1 -----
SFO1    125.750733 MHz
NUC1     13C
P1       9.06 usec
PLM1     123.9599908 W

----- CHANNEL f2 -----
SFO2    500.0520902 MHz
NUC2     1H
CPDPRG2  waltz16
PCPD2    80.00 usec
PLM2     18.35600090 W
PLM12    0.33978001 W
PLM13    0.23026006 W

F2 - Processing parameters
SI       32768
SF       125.7376730 MHz
NUM      655
SFB      0
LB       3.00 Hz
GB       0
PC       1.40
  
```

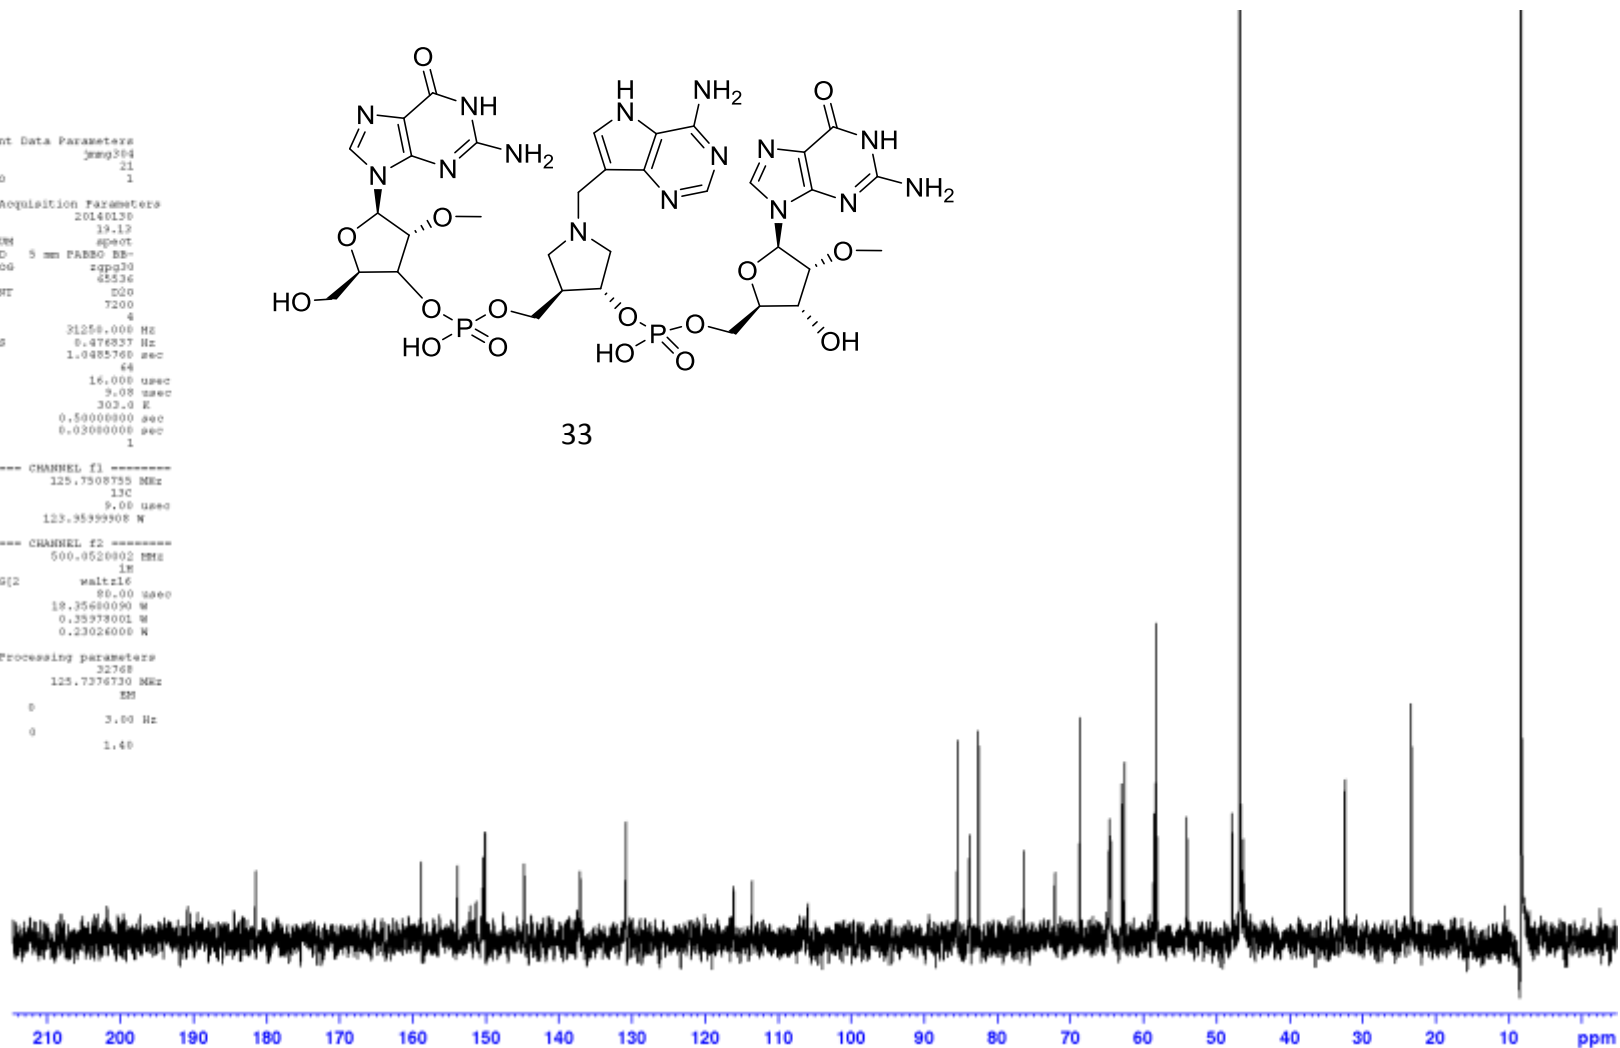

**<sup>31</sup>P NMR  
202 MHz**

Current Data Parameters  
 NAME jmg304  
 EXPNO 26  
 PROCNO 1

F2 - Acquisition Parameters  
 Date\_ 20140131  
 Time 3.19  
 INSTRUM spect  
 PROBRD 5 mm PARBO BR-  
 PULPROG zgpg30  
 ID 131072  
 SOLVENT D2O  
 NS 168  
 DS 4  
 SWH 81521.742 Hz  
 FIDRES 0.421962 Hz  
 AQ 0.8034083 sec  
 RG 2050  
 EN 6.138 usec  
 DE 6.50 usec  
 TE 303.0 K  
 D1 2.08000000 sec  
 D11 0.03000000 sec  
 TDO 1

----- CHANNEL f1 -----  
 SFO1 202.4360984 MHz  
 NUCL1 31P  
 P1 18.40 usec  
 PL1 35.50099945 W

----- CHANNEL f2 -----  
 SFO2 500.852082 MHz  
 NUC2 1H  
 CPDPRG2 waltz16  
 PCPD2 90.00 usec  
 P1M2 18.35608098 W  
 PLM2 0.35978001 W  
 P1M3 0.23926000 W

F2 - Processing parameters  
 SI 65536  
 SF 202.4239500 MHz  
 NDM 819  
 BR 0  
 LR 3.00 Hz  
 GB 0  
 PC 1.40

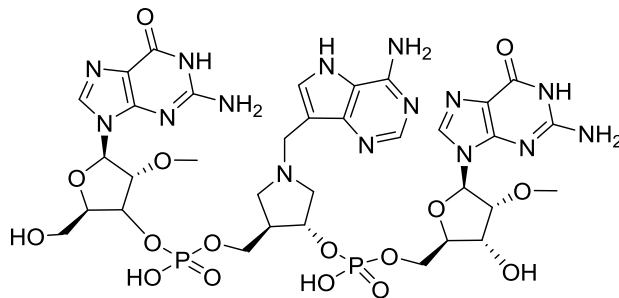

**33**

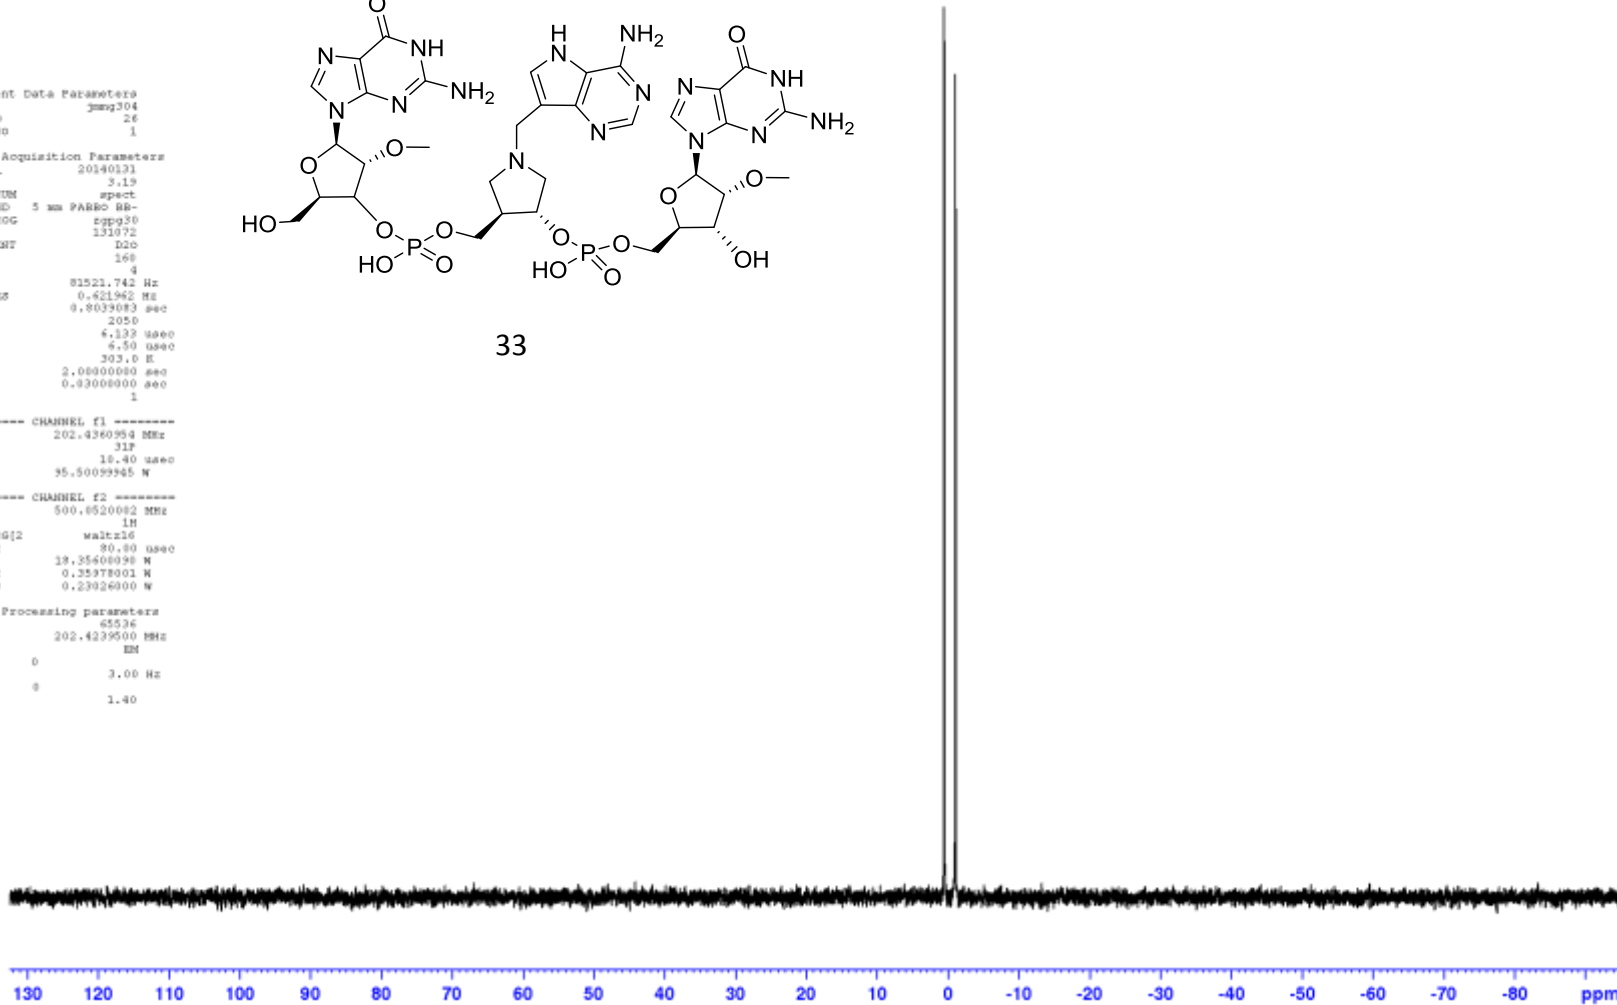

# HPLC

Data File D:\DATA\2014\FEB042014\20140204B 2014-02-04 15-51-09\JMG304.D  
 Sample Name: jmg304

```

=====
Acq. Operator   : SYSTEM                      Seq. Line :    3
Acq. Instrument : LCMS                      Location  : Vial 82
Injection Date  : 2/4/2014 4:09:23 PM       Inj       :    1
                                           Inj Volume: 1.000 µl

Acq. Method    : D:\DATA\FEB042014\20140204B 2014-02-04 15-51-09\P1 T9 AW BM FA 5-50M G5H1 .9-
                20.M
Last changed   : 2/4/2014 3:51:10 PM by SYSTEM
Analysis Method: D:\DATA\2014\FEB042014\20140204B 2014-02-04 15-51-09\P1 T9 AW BM FA 5-50M G5H1
                .9-20.M (Sequence Method)
Last changed   : 2/4/2014 3:51:10 PM by SYSTEM
Method Info    : Position 1; Poroshell 120 EC-C18 3x50mm 2.7µm; A:Water+0.1FA, B:MeOH; T0-5min
                5-50%B; T5-6 min 50%B; Flow 0.5 mL/min; m/z 100-1000
  
```

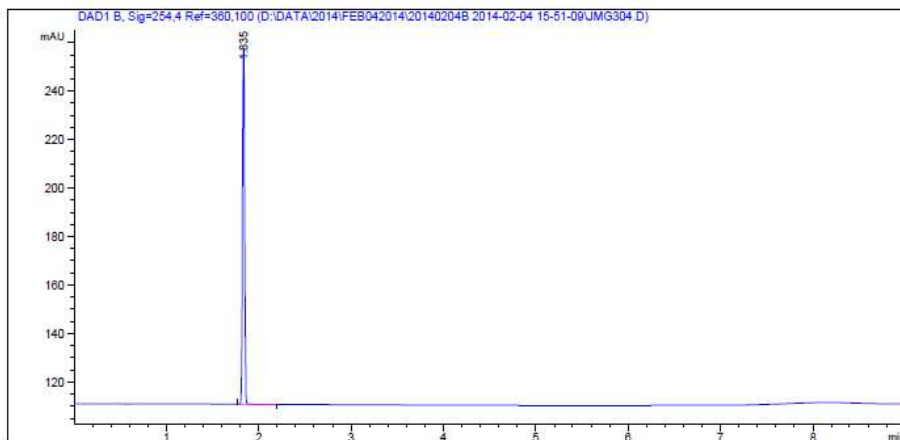

## Area Percent Report

```

Sorted By      : Signal
Multiplier     : 1.0000
Dilution       : 1.0000
Do not use Multiplier & Dilution Factor with ISTDs
  
```

Signal 1: DAD1 B, Sig=254,4 Ref=360,100

Data File D:\DATA\2014\FEB042014\20140204B 2014-02-04 15-51-09\JMG304.D  
 Sample Name: jmg304

| Peak #   | RetTime [min] | Type | Width [min] | Area [mAU*s] | Height [mAU] | Area %   |
|----------|---------------|------|-------------|--------------|--------------|----------|
| 1        | 1.835         | BB   | 0.0244      | 233.36501    | 147.69135    | 100.0000 |
| Totals : |               |      |             | 233.36501    | 147.69135    |          |

\*\*\* End of Report \*\*\*

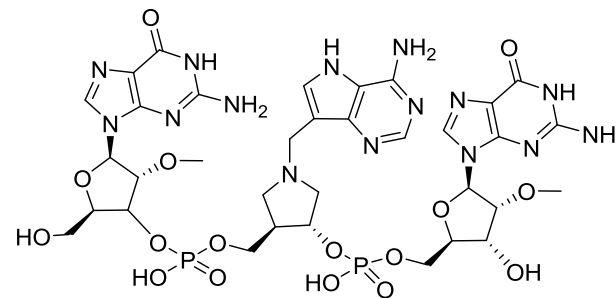

33



<sup>1</sup>H NMR  
500 MHz

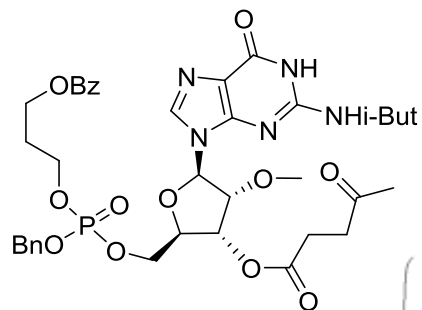

34

Current Data Parameters  
NAME jmg213rn  
EXPNO 10  
PROCNO 1

F2 - Acquisition Parameters  
Date\_ 20130514  
Time 14.47  
INSTRUM spect  
PROBHD 5 mm PABBO BB-  
PULPROG zg30  
TD 45536  
SOLVENT CDCl3  
NS 32  
DS 2  
SWH 10330.578 Hz  
FIDRES 0.157632 Hz  
AQ 3.1719425 sec  
RG 28.5  
DM 49.400 usec  
DE 6.50 usec  
TE 302.9 K  
DL 1.0000000 sec  
TD0 1

===== CHANNEL f1 =====  
NUC1 1H  
P1 11.20 usec  
PL1 1.00 dB  
F1IN 18.35641289 MHz  
SF01 500.0530980 MHz

F2 - Processing parameters  
S2 32768  
SF 500.0499843 MHz  
WDW EM  
SSB 0  
LB 0.39 Hz  
GB 0  
FC 1.00

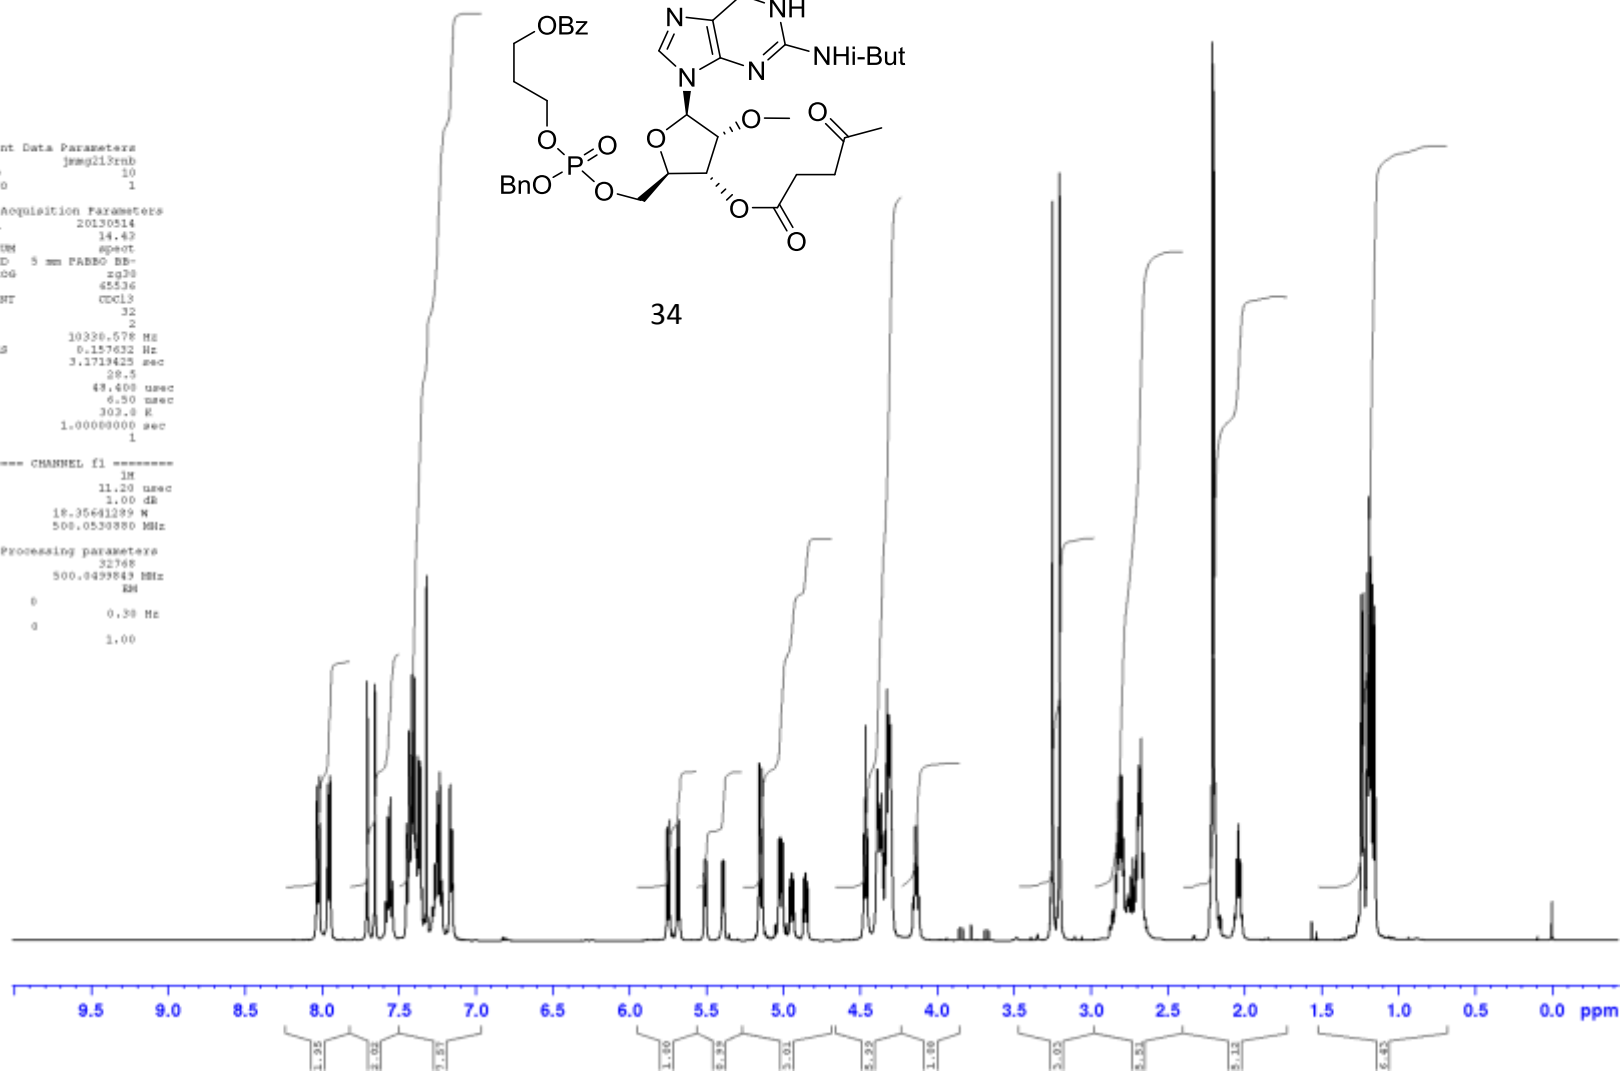

<sup>13</sup>C NMR  
126 MHz

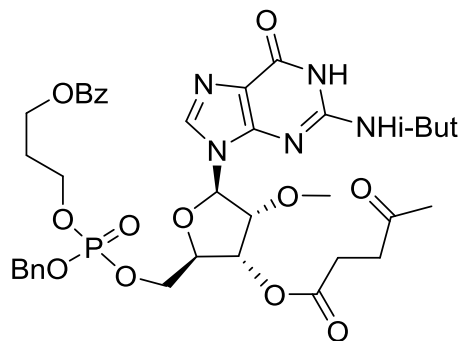

34

```
Current Data Parameters
NAME      mag213rn
EXPNO    10
PROCNO   1

F2 - Acquisition Parameters
Date_    20130514
Time     16.37
INSTRUM  spect
PROBHD   5 mm PABBO BB-
PULPROG  zgpg30
TD       65536
SOLVENT  cpd13
NS       830
DS       4
SWH      31250.000 Hz
FIDRES   0.476837 Hz
AQ       1.0485760 sec
RG       2050
DW       18.000 usec
DE       10.000 usec
TE       305.0 K
D3       8.58000000 sec
D11      8.09000000 sec
TE0      1

----- CHANNEL f1 -----
NUC1     13C
P1       11.00 usec
P11      9.80 dB
P11M     31.72492027 W
SFO1     125.0984648 MHz

***** CHANNEL f2 *****
CPDPRG2  waltz16
NUC2     1H
PCPD2    80.00 usec
P12      -3.80 dB
P112     14.39 dB
P113     17.80 dB
P12M     29.65579948 W
P112M    0.43968320 W
P113M    0.19186878 W
SFO2     499.8419994 MHz

F2 - Processing parameters
SI       32768
SF       125.0984648 MHz
MCW      IM
SAB      0
LB       3.00 Hz
GB       0
PC       1.49
```

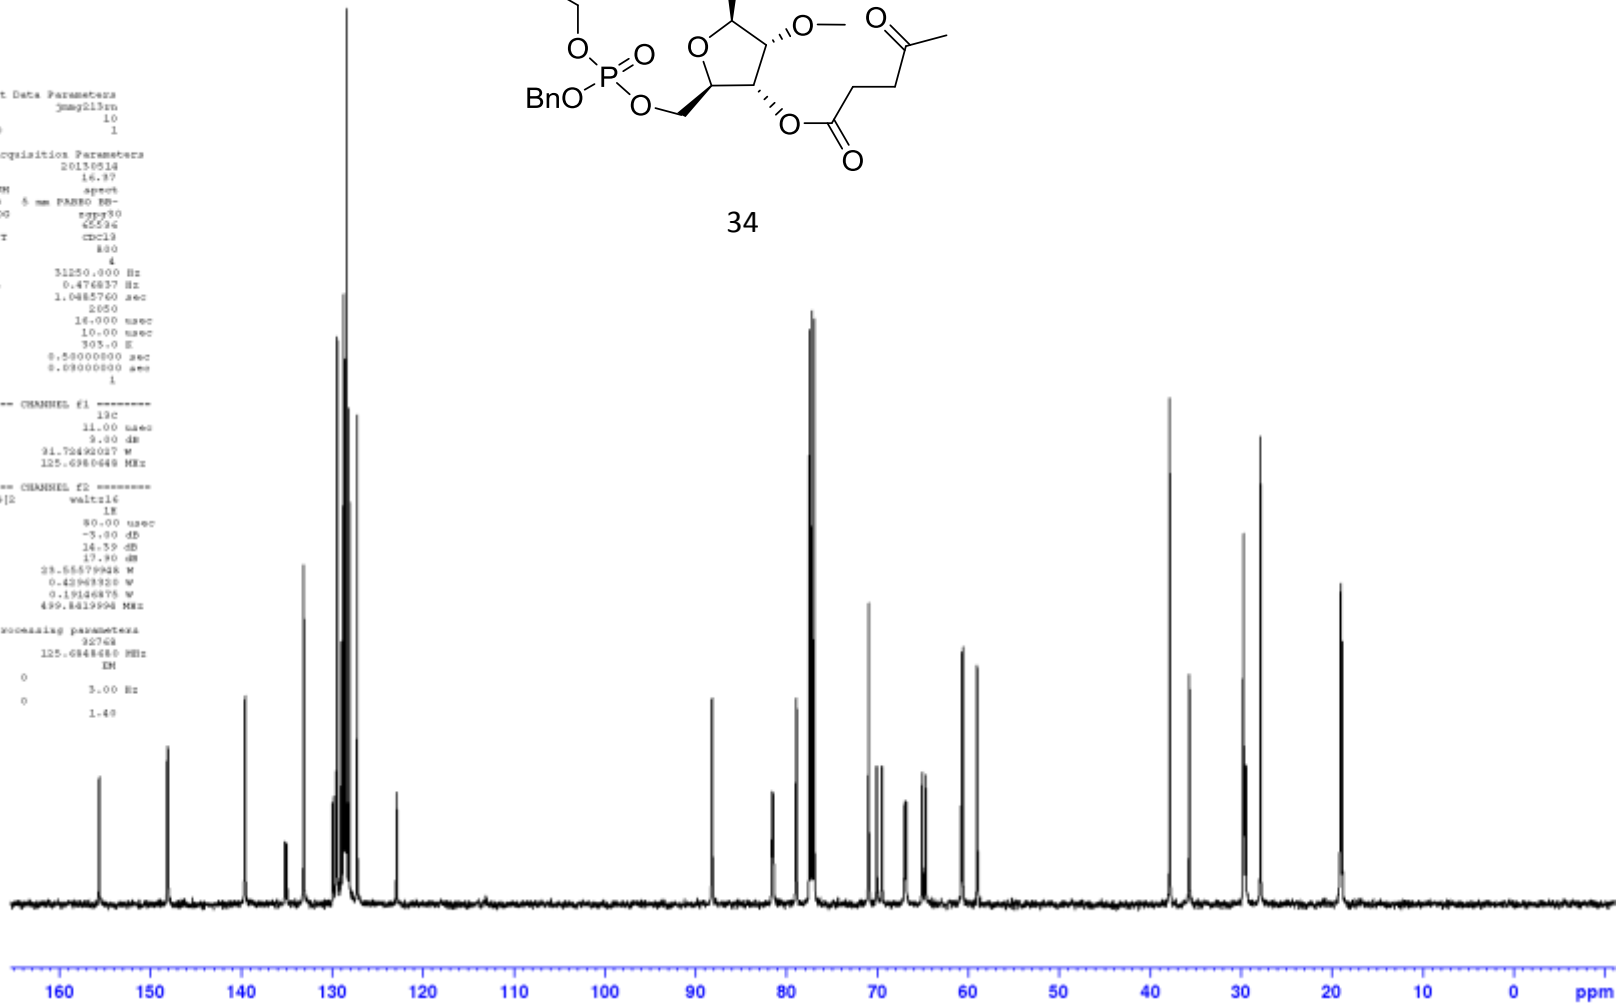

**<sup>31</sup>P NMR**  
**202 MHz**

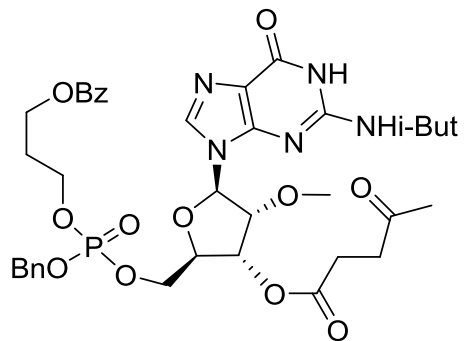

34

```
Current Data Parameters
NAME      300021544
EXPNO     11
PROCNO    1

F2 - Acquisition Parameters
Date_     20130514
Time      14:47
INSTRUM   spect
PROBHD    5 mm PABBO BB-
PULPROG   zgpg30
TD        131072
SOLVENT   CDCl3
NS        32
DS        4
SWH        81521.742 Hz
FIDRES    0.621962 Hz
AQ         0.8039083 sec
RG         2058
DW         6.123 usec
DE         6.50 usec
TE         299.2 K
D1         3.0000000 sec
d11        0.03000000 sec
TE0        1

----- CHANNEL f1 -----
NUC1       31P
P1         18.40 usec
P11        -1.00 dB
P1LM       55.50078523 W
SFO1       202.4340954 MHz

----- CHANNEL f2 -----
CHOPPRG2  mltiplc
NUC2       1H
PCPD2     80.00 usec
P12        1.00 dB
P112       19.08 dB
P113       21.10 dB
P12M       18.35641289 W
P112M      0.35907363 W
P113M      0.17948569 W
SFO2       500.0520082 MHz

F2 - Processing parameters
SI         65536
SF         202.4239500 MHz
NCM        0
ZSN        0
GB         0
PC         1.40
```

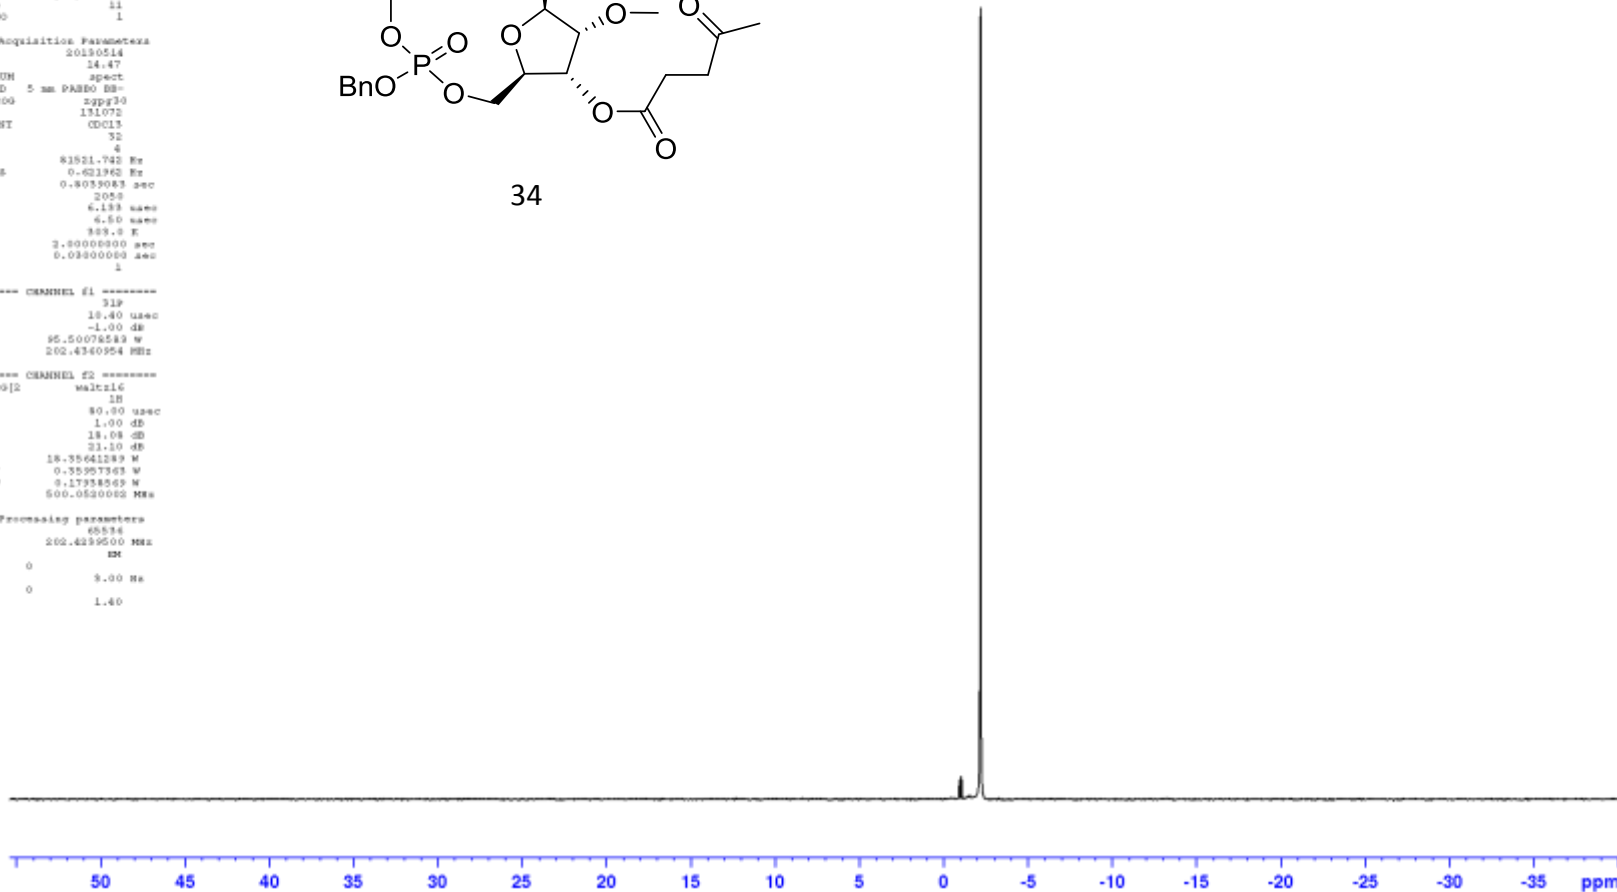

<sup>1</sup>H NMR  
500 MHz

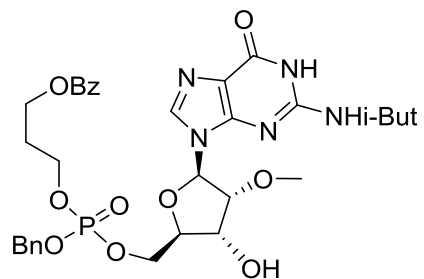

35

```
Current Data Parameters
NAME          JMWG217
EXPNO        10
PROCNO        1

F2 - Acquisition Parameters
Date_         20130515
Time          14.35
INSTRUM      spect
PROBHD       5 mm PABBO BB-
PULPROG      zgpg30
TD           45536
SOLVENT      CDCl3
NS           32
DS           2
SWH          10302.198 Hz
FIDRES       0.157139 Hz
AQ           3.1806305 sec
RG           80.4
DM           48.533 usec
DE           10.00 usec
TE           302.2 K
D1           1.00000000 sec
TD0          1

===== CHANNEL f1 =====
NUC1          1H
P1            10.00 usec
P11           -3.00 dB
PL1M         23.55579948 W
SFO1         499.8420867 MHz

F2 - Processing parameters
SI            32768
SF           499.832973 MHz
WDW          EM
SSB          0
LB           0.39 Hz
GB           0
PC           1.00
```

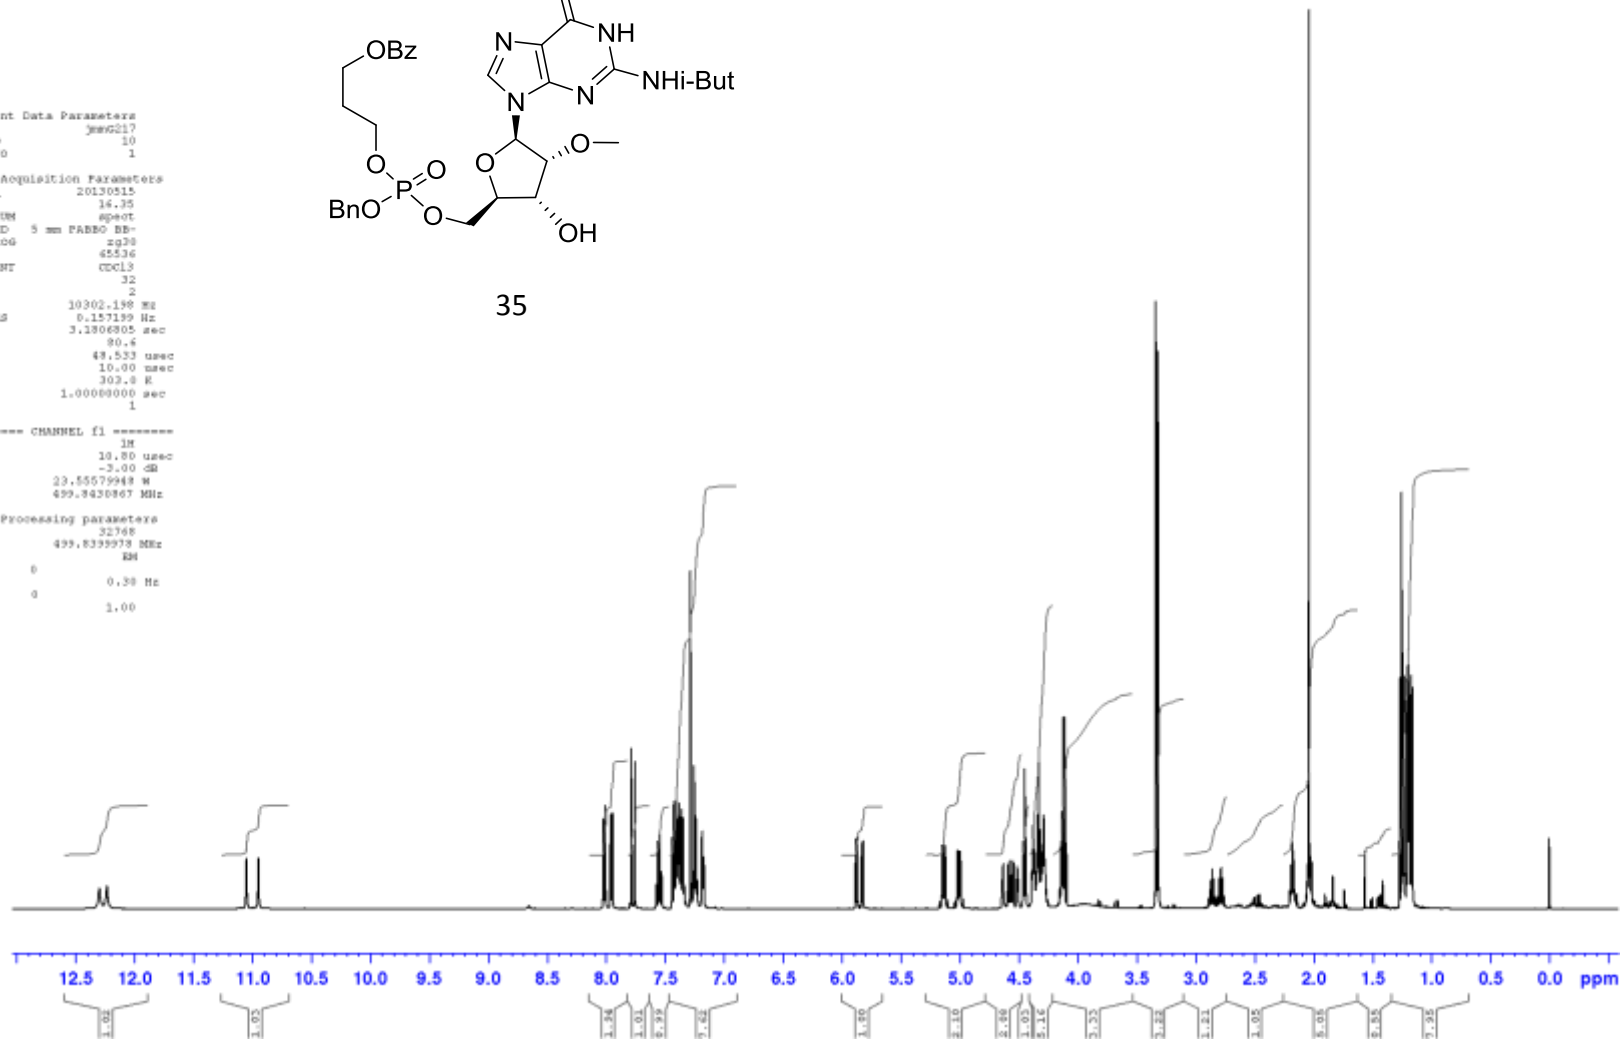

<sup>13</sup>C NMR  
126 MHz

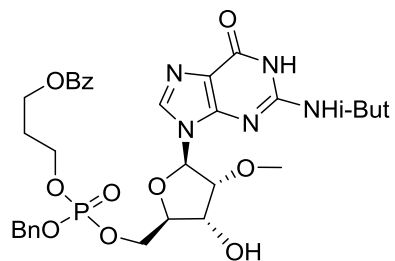

35

```

Current Data Parameters
NAME          jmm0217
EXPNO         11
PROCNO        1

F2 - Acquisition Parameters
Date_         20150515
Time          16:39
INSTRUM       spect
PROBHD        5 mm PABBO BB-
PULPROG       zgpg30
TD            65536
SOLVENT       cpd13
NS            830
DS            4
SWH           31250.000 Hz
FIDRES        0.476837 Hz
AQ            1.0485760 sec
RG            2050
DM            18.000 usec
DE            10.00 usec
IE            305.0 E
D3            8.59000000 sec
D11           8.09000000 sec
TEO           1

----- CHANNEL f1 -----
NUC1          13C
P1            11.00 usec
P11           9.00 dB
P1LW         31.7049027 W
SFO1         125.0984648 MHz

***** CHANNEL f2 *****
CPDPRG2       waltz16
NUC2          1H
PCPD2        80.00 usec
P12           -3.00 dB
P1L2         14.39 dB
P1L3         17.90 dB
P1LW         29.65579948 W
P1L3W        0.43969320 W
P1L3W        0.19166875 W
SFO2         499.8419994 MHz

F2 - Processing parameters
SI            32768
SF           125.0984648 MHz
WDW          EM
SSB           0
LB            3.00 Hz
GB            0
PC            1.49
  
```

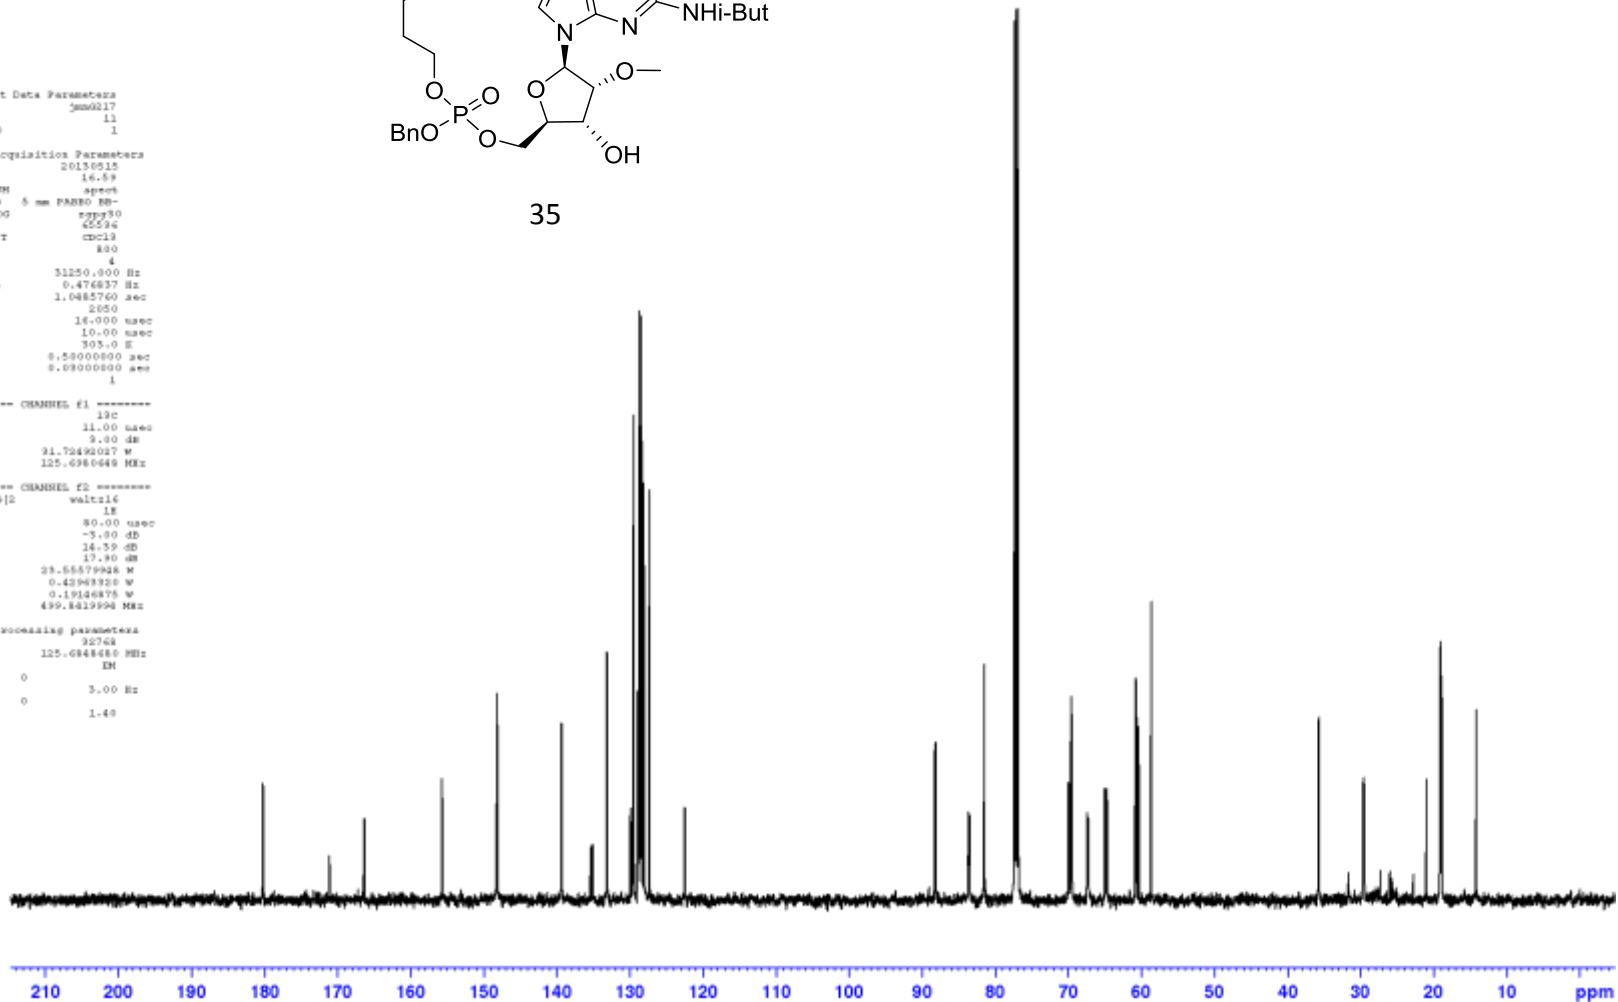

**<sup>31</sup>P NMR  
202 MHz**

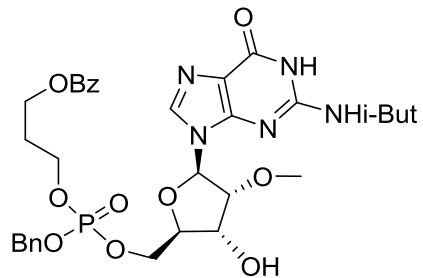

35

```
Current Data Parameters
NAME      jsm0217
EXPNO     12
PROCNO    1

F2 - Acquisition Parameters
Date_     20101010
Time      17.03
INSTRUM   spect
PROBHD    5 mm PABBO 9H-
PULPROG   zgpg30
TD         131072
SOLVENT   CDCl3
NS         32
DS         4
SWH        81521.742 Hz
FIDRES     0.421962 Hz
AQ          0.489928 sec
RG          3850
DW          6.133 usec
DE          16.05 usec
IE          503.0 E
D1          2.0000000 sec
D11         0.9300000 sec
TD0         1

===== CHANNEL f1 =====
NUC1       31p
P1         10.00 usec
P11        2.00 dB
P11W       49.10909458 W
SFO1       202.3510806 MHz

===== CHANNEL f2 =====
CPDPRG2   waltz16
NUC2       1H
PCPD2     80.00 usec
P21        3.00 dB
P212       14.33 dB
P213       17.95 dB
P21W       23.55579948 W
P21W2     0.42049320 W
P21W3     0.19146875 W
SFO2       499.8419994 MHz

F2 - Processing parameters
SI         65536
SF         202.3389410 MHz
MEW        0
SFO        0
LB          0
GB          0
WC          1.40
```

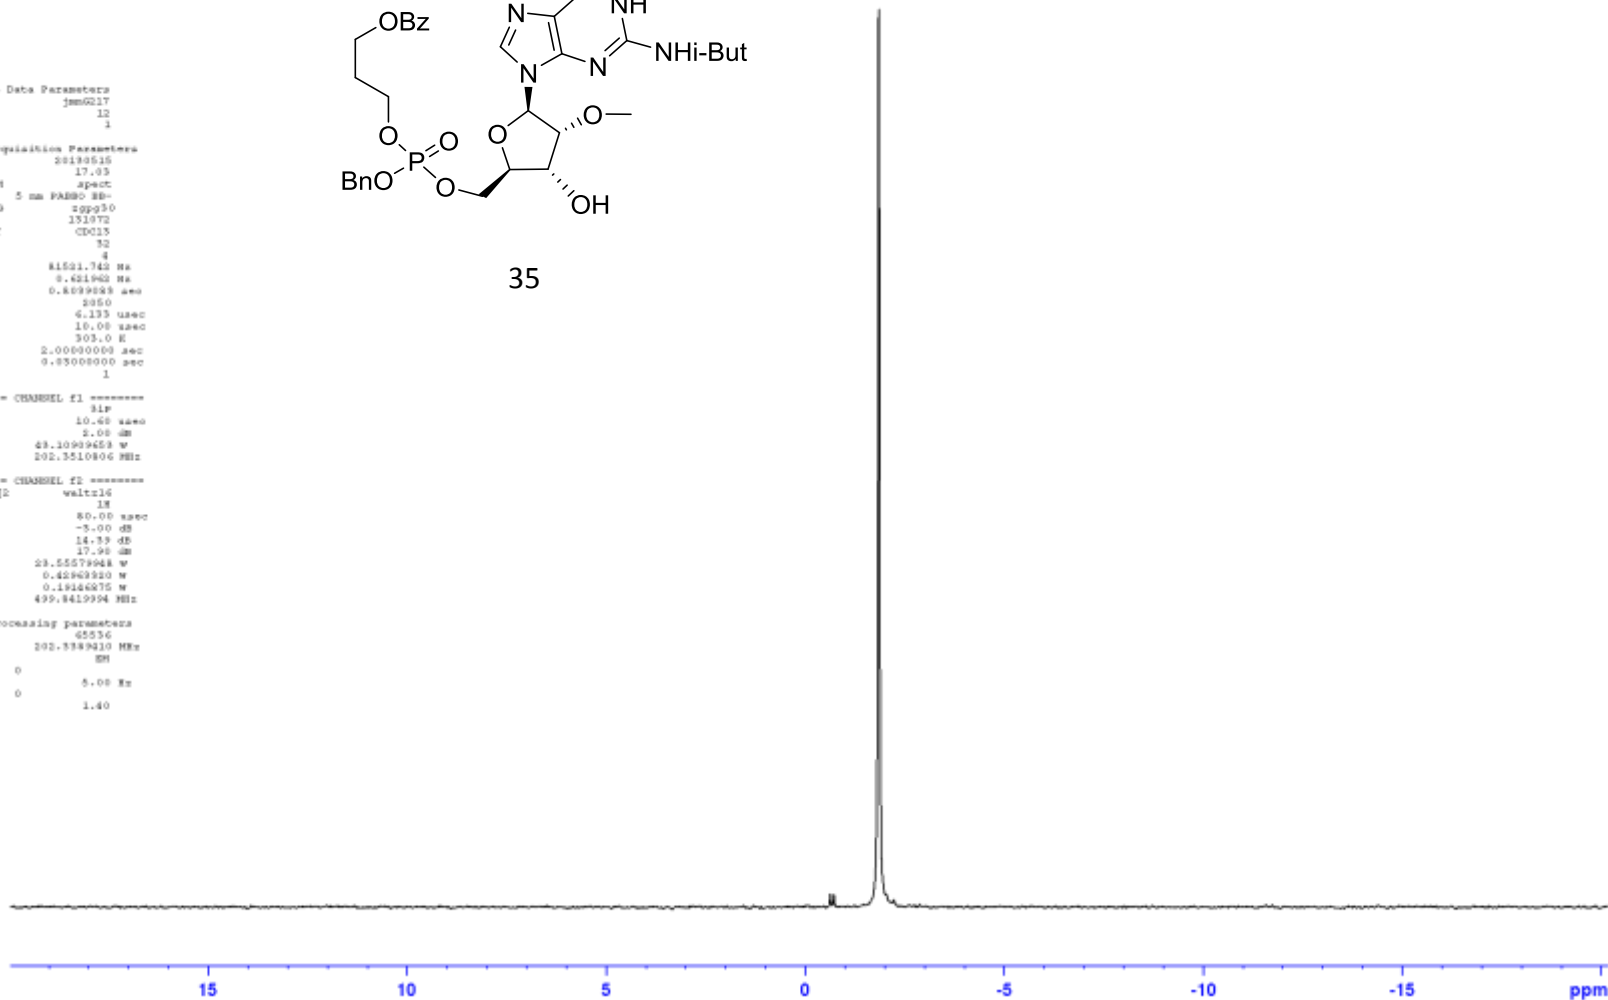

**<sup>31</sup>P NMR  
202 MHz**

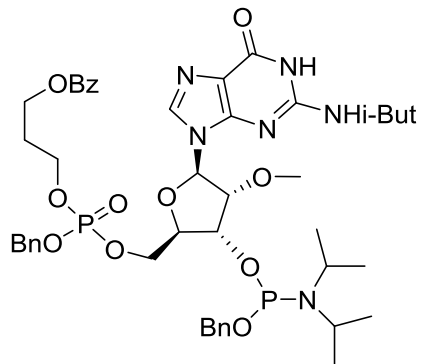

36

```
Current Data Parameters
NAME          jsm019a
EXPNO         10
PROCNO        1

F2 - Acquisition Parameters
Date_         20130520
Time          16:56
INSTRUM       spect
PROBHD        5 mm PABBO BB-
PULPROG       zgpg30
TD            131072
SOLVENT       CDCl3
HG            32
DS            4
SWH           81521.742 Hz
FIDRES        0.621962 Hz
AQ            0.8035083 sec
RG            2058
DW            6.123 usec
DE            6.50 usec
TE            300.2 K
D1            3.0000000 sec
d11           0.0300000 sec
TE0           1

----- CHANNEL f1 -----
NUC1          31P
P1            18.40 usec
P11           -1.00 dB
P1LW         55.50078523 W
SFO1         202.4340954 MHz

----- CHANNEL f2 -----
CHOPPRG2     mlticlc
NUC2          1H
PCPD2        80.00 usec
P12           1.00 dB
P1L2         19.08 dB
P1L3         21.10 dB
P1LW         18.35641289 W
P1L1W        0.35907363 W
P1L3W        0.17384569 W
SFO2         500.0520082 MHz

F2 - Processing parameters
SI            65536
SF           202.4239500 MHz
NCM           324
ZSN           0
LB            3.00 Hz
GB            0
PC            1.40
```

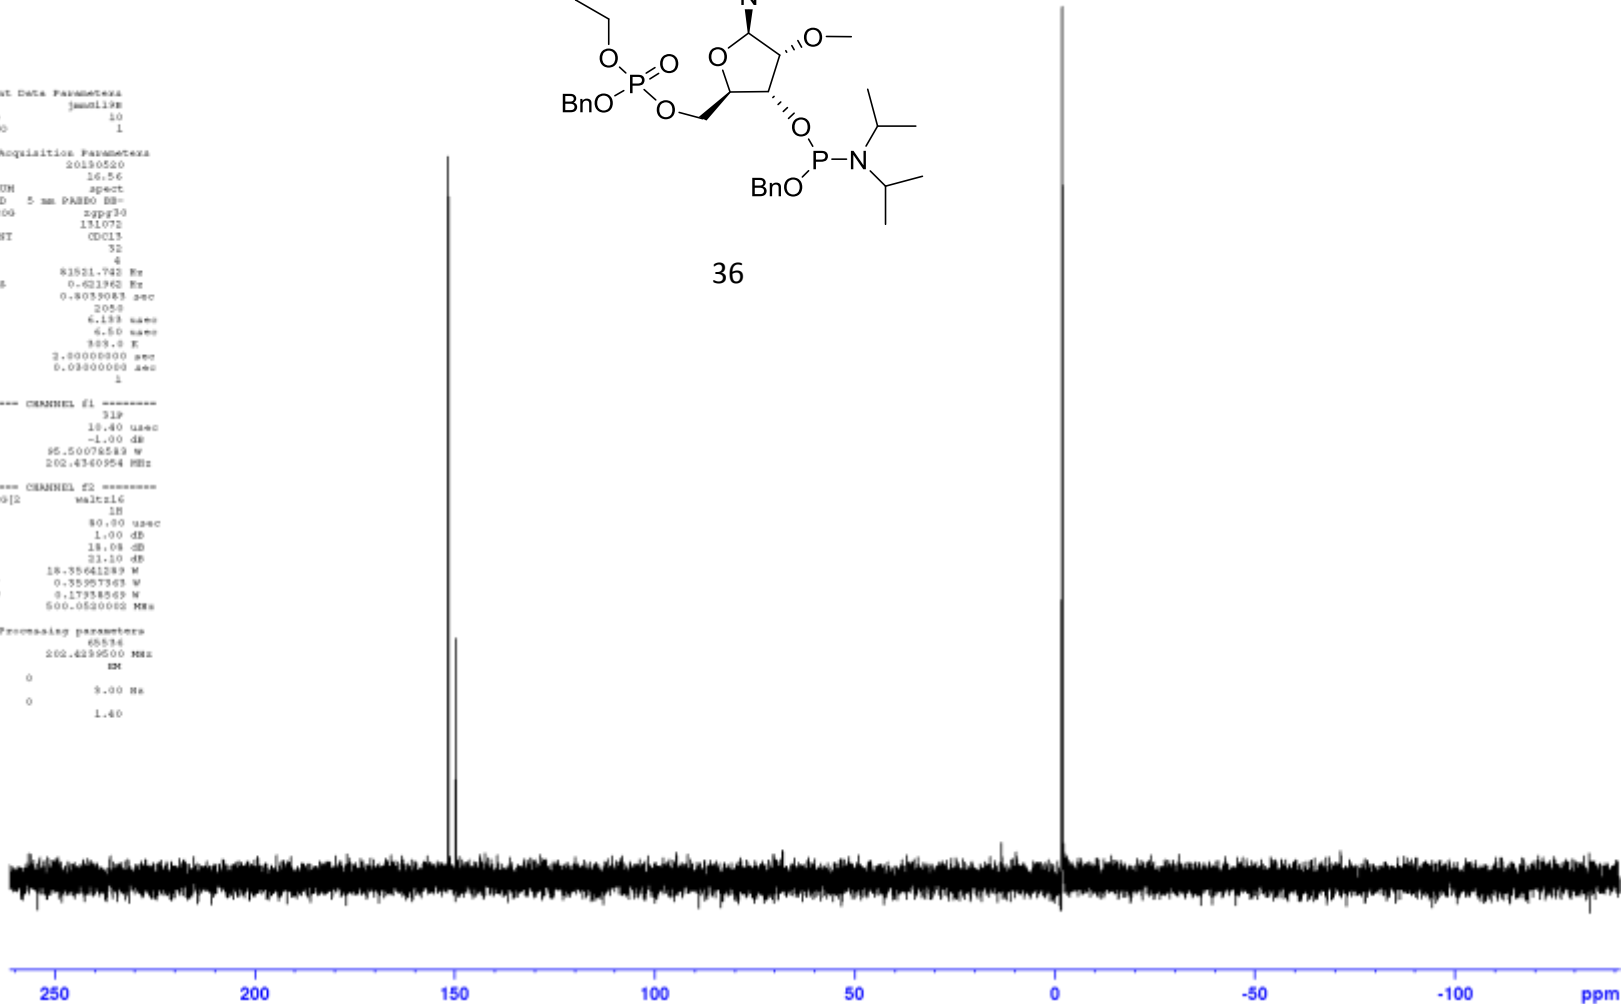





**<sup>13</sup>C NMR  
126 MHz**

```

Current Data Parameters
NAME      Jmgg218
EXPNO    11
PROCNO   1

F2 - Acquisition Parameters
Date_    20150515
Time     15:32
INSTRUM  spect
PROBHD   5 mm PABBO BB-
PULPROG  zgpg30
TD       65536
SOLVENT  cpd13
NS       830
DS       4
SWH      31250.000 Hz
FIDRES   0.476837 Hz
AQ       1.0485760 sec
RG       2050
DM       18.000 usec
DE       10.00 usec
TE       305.0 K
D3       8.58000000 sec
D11      8.09000000 sec
TEO      1

----- CHANNEL f1 -----
NUC1     13C
P1       11.00 usec
P11      9.00 dB
P11M     31.7049027 W
SFO1     125.0984648 MHz

***** CHANNEL f2 *****
CPDPRG2  waltz16
NUC2     1H
PCPD2    80.00 usec
P12      -3.00 dB
P112     14.39 dB
P113     17.90 dB
P12M     29.65579948 W
P112M    0.42969320 W
P113M    0.19186875 W
SFO2     499.8419994 MHz

F2 - Processing parameters
SI       32768
SF       125.0984648 MHz
MCM      IM
ASD      0
LB       3.00 Hz
GB       0
PC       1.49
  
```

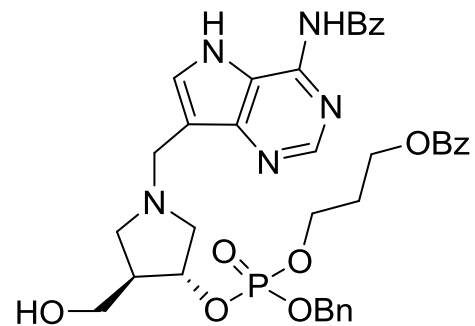

37

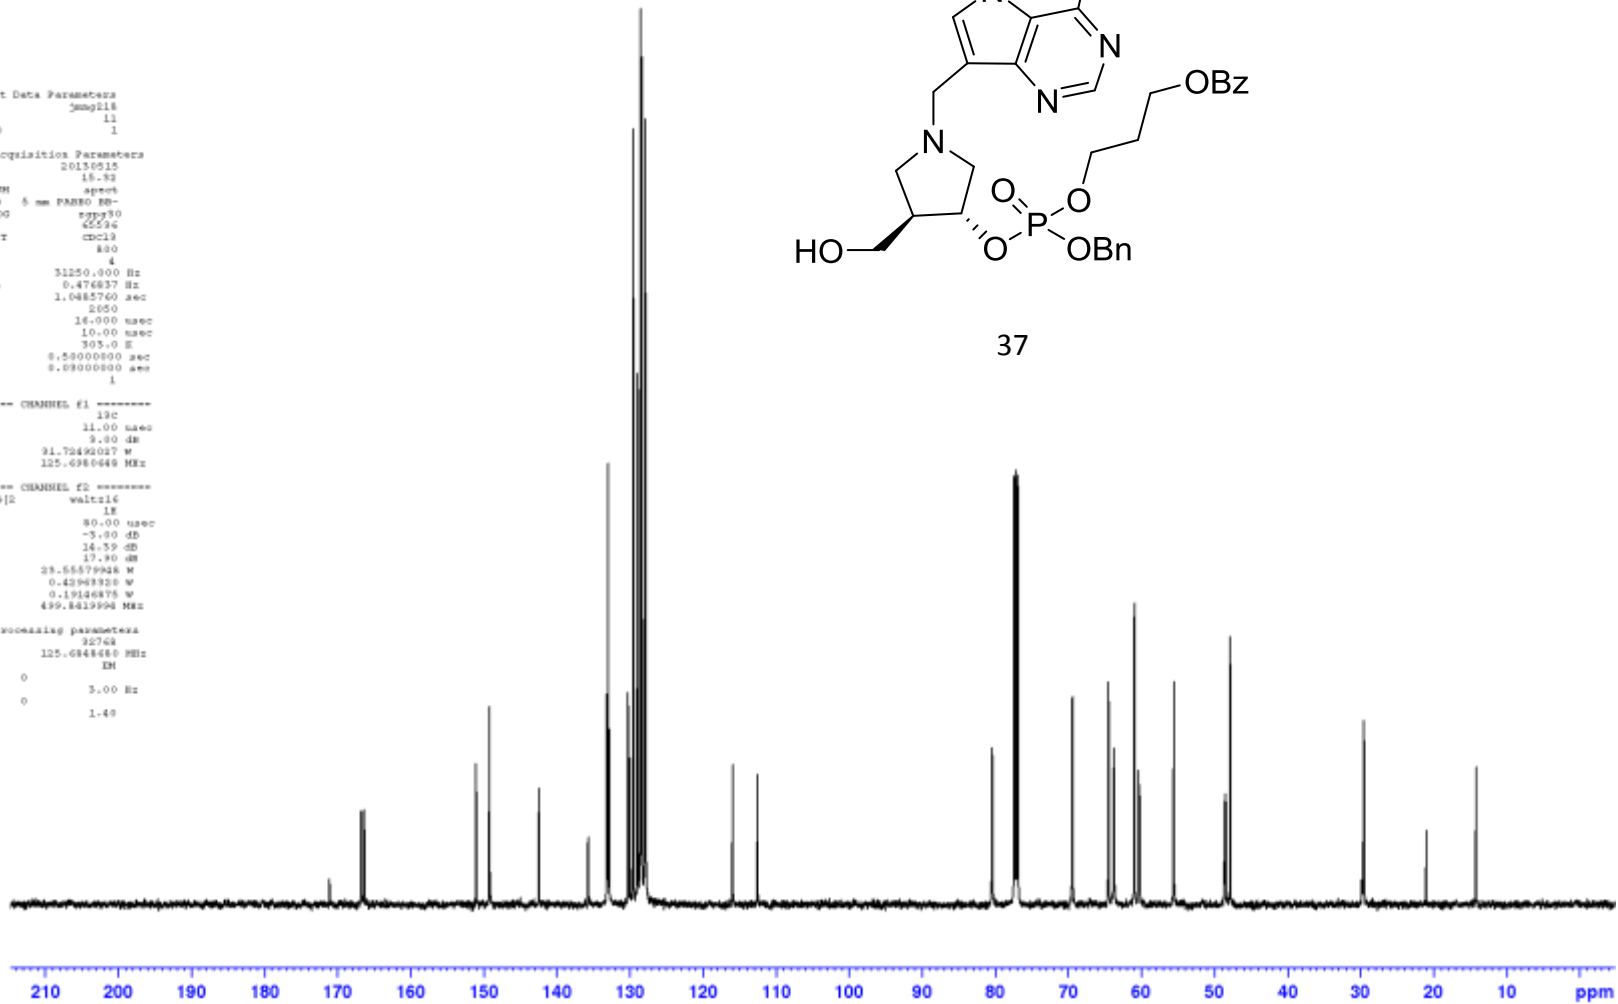

**<sup>31</sup>P NMR  
202 MHz**

```
Current Data Parameters
NAME      3mgp218
EXPNO    12
PROCNO    1

F2 - Acquisition Parameters
Date_    20180615
Time     15:47
INSTRUM   spect
PROBHD    5 mm PABBO BB-
PULPROG   zgpg30
TD        134072
SOLVENT   cdcl3
NS         52
DS         4
SFO       61521.742 Hz
FIDRES    0.621962 Hz
AQ         0.8039083 sec
RG         2550
DW         6.133 usec
DE         10.00 usec
TE        303.0 K
D3         2.00000000 sec
D11        0.09000000 sec
TEO        1
```

```
----- CHANNEL F1 -----
NUC1      31P
P1         10.40 usec
P11        5.00 dB
P11M       43.18969458 W
SFO1       202.3510846 MHz
```

```
----- CHANNEL F2 -----
CPDPRG2   waltz16
NUC2       1H
PCPD2      80.00 usec
P12        -5.00 dB
P112       14.39 dB
P113       17.80 dB
P12M       29.65579948 W
P112M      0.43968320 W
P113M      0.19186875 W
SFO2       499.8419904 MHz
```

```
F2 - Processing parameters
SI         65536
SF         202.3389410 MHz
MCW        IM
SAB        0
LB         5.00 Hz
GB         0
PC         1.49
```

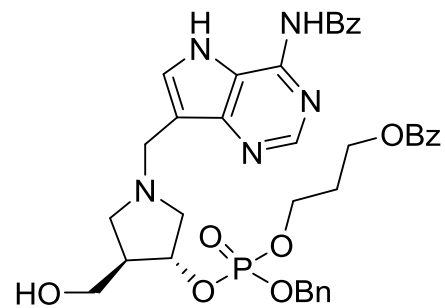

37

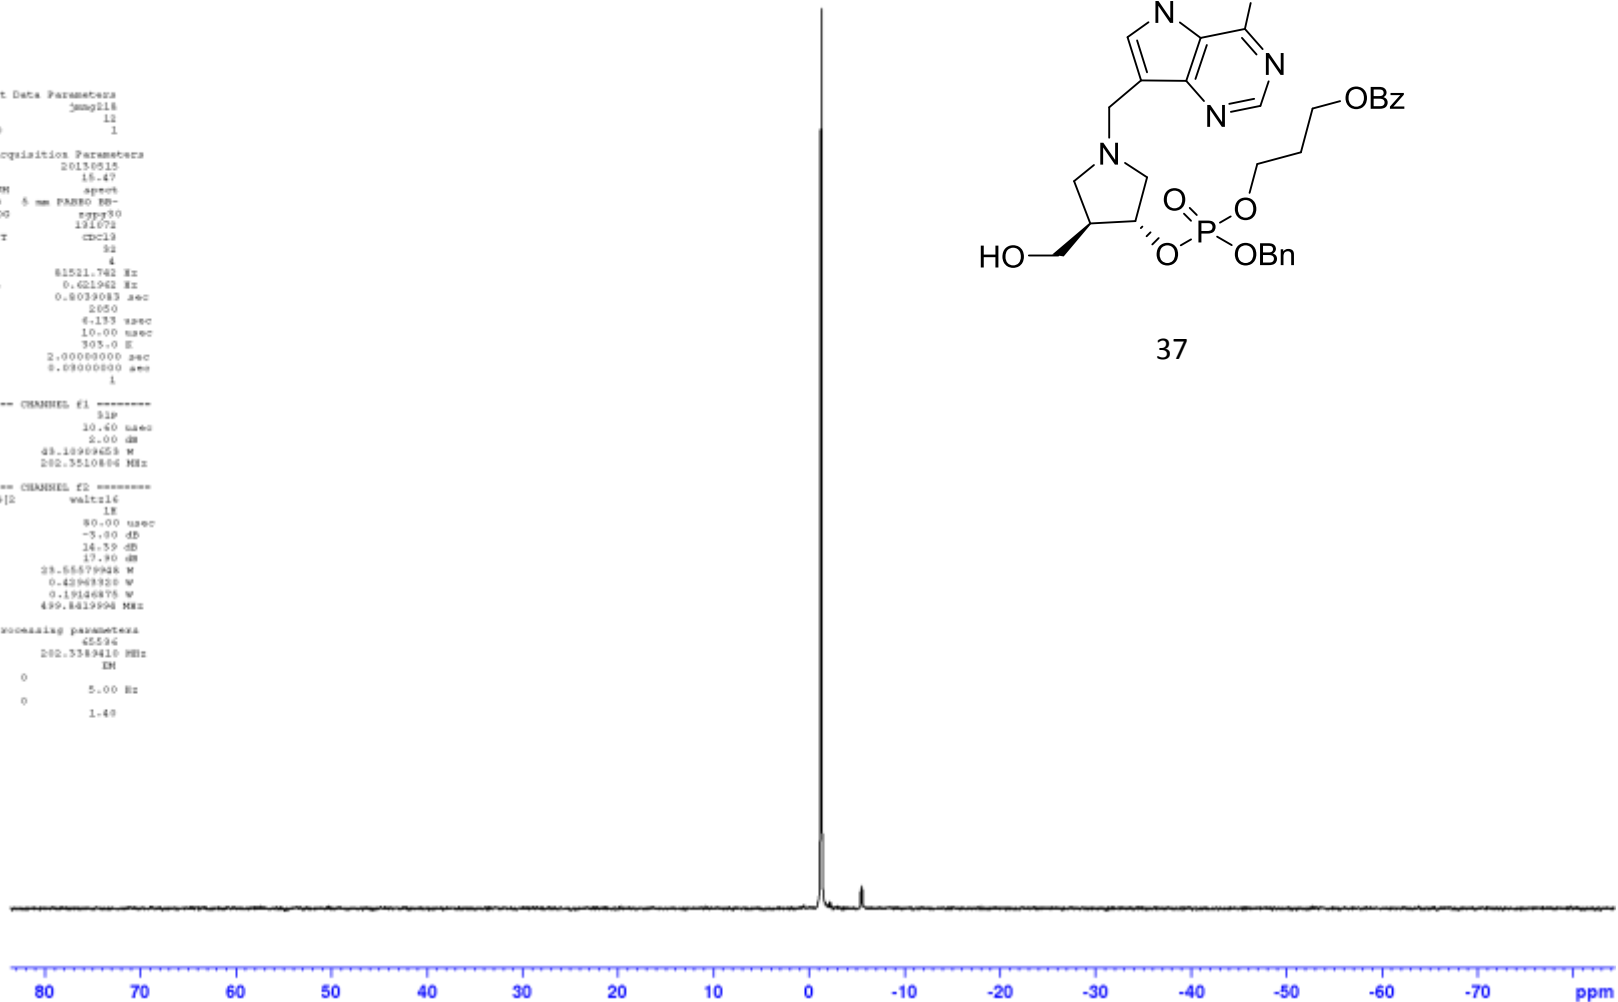



<sup>13</sup>C NMR  
126 MHz

```

Current Data Parameters
NAME      jmm0219
EXPNO     21
PROCNO    1

F2 - Acquisition Parameters
Date_     20130524
Time      1:00
INSTRUM   spect
PROBHD    5 mm PABBO BB-
PULPROG   zgpg30
TD        65536
SOLVENT   cpd13
NS        2400
DS        4
SFO       31250.000 Hz
FIDRES    0.474637 Hz
AQ        1.0485760 sec
RG        1030
DW        18.000 usec
DE        15.08 usec
TE        303.0 K
D3        8.58000000 sec
D11       8.09000000 sec
TEO       1

----- CHANNEL F1 -----
NUC1      13C
P1        9.00 usec
P11       -1.00 dB
P11W     123.9428884 W
SFO1      125.7506755 MHz

***** CHANNEL F2 *****
CPDPRG2   waltz16
NUC2      1H
PCPD2     80.00 usec
P12       1.00 dB
P112     19.98 dB
P113     21.10 dB
P12W     18.95441289 W
P112W    0.35867363 W
P113W    0.17983663 W
SFO2     500.0520002 MHz

F2 - Processing parameters
SI        32768
SF        125.7376730 MHz
MCM       EM
ASB       0
LB        3.00 Hz
GB        0
PC        1.49

```

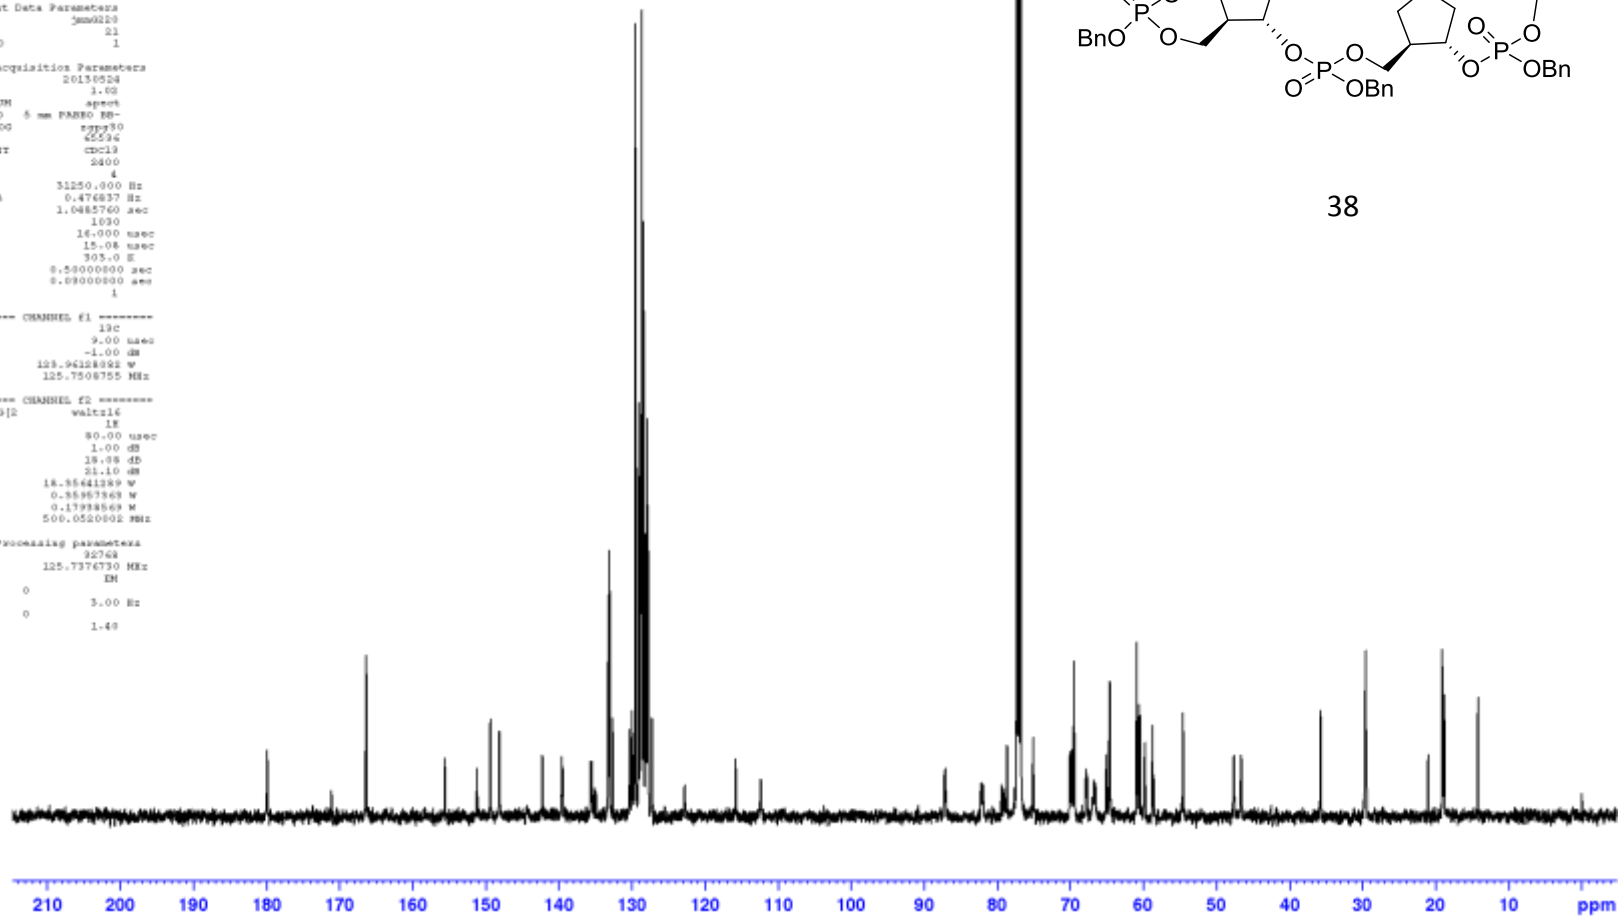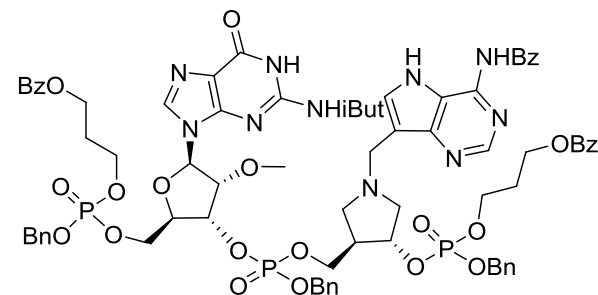

38

**<sup>31</sup>P NMR  
202 MHz**

```
Current Data Parameters
NAME      jmac220
EXPNO    14
PROCNO   1

F2 - Acquisition Parameters
Date_    20130524
Time     4.35
INSTRUM  spect
PROBHD   5 mm PABBO BB-
PULPROG  zgpg30
TD       131072
SOLVENT  CDCl3
NS       32
DS       4
SWH      81521.742 Hz
FIDRES   0.621962 Hz
AQ       0.8035083 sec
RG       2058
DW       6.123 usec
DE       6.50 usec
TE       300.2 K
D1       3.0000000 sec
d11      0.0200000 sec
TE0      1

===== CHANNEL f1 =====
NUC1     31P
P1       18.40 usec
P11      -1.00 dB
P1LM     55.50078523 W
SFO1     202.4340954 MHz

===== CHANNEL f2 =====
CHOPPRG2  mltiplc
NUC2      1H
PCPD2    80.00 usec
P12       1.00 dB
P112     19.08 dB
P113     21.10 dB
P12M     18.35641289 W
P112M    0.35907363 W
P113M    0.17348569 W
SFO2     500.0520082 MHz

F2 - Processing parameters
SI       65536
SF       202.4239500 MHz
NCM      324
ZSN      0
LB       3.00 Hz
GB       0
PC       1.40
```

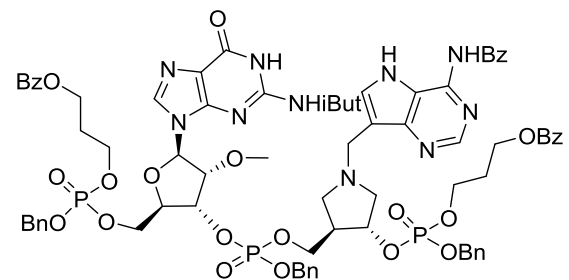

38

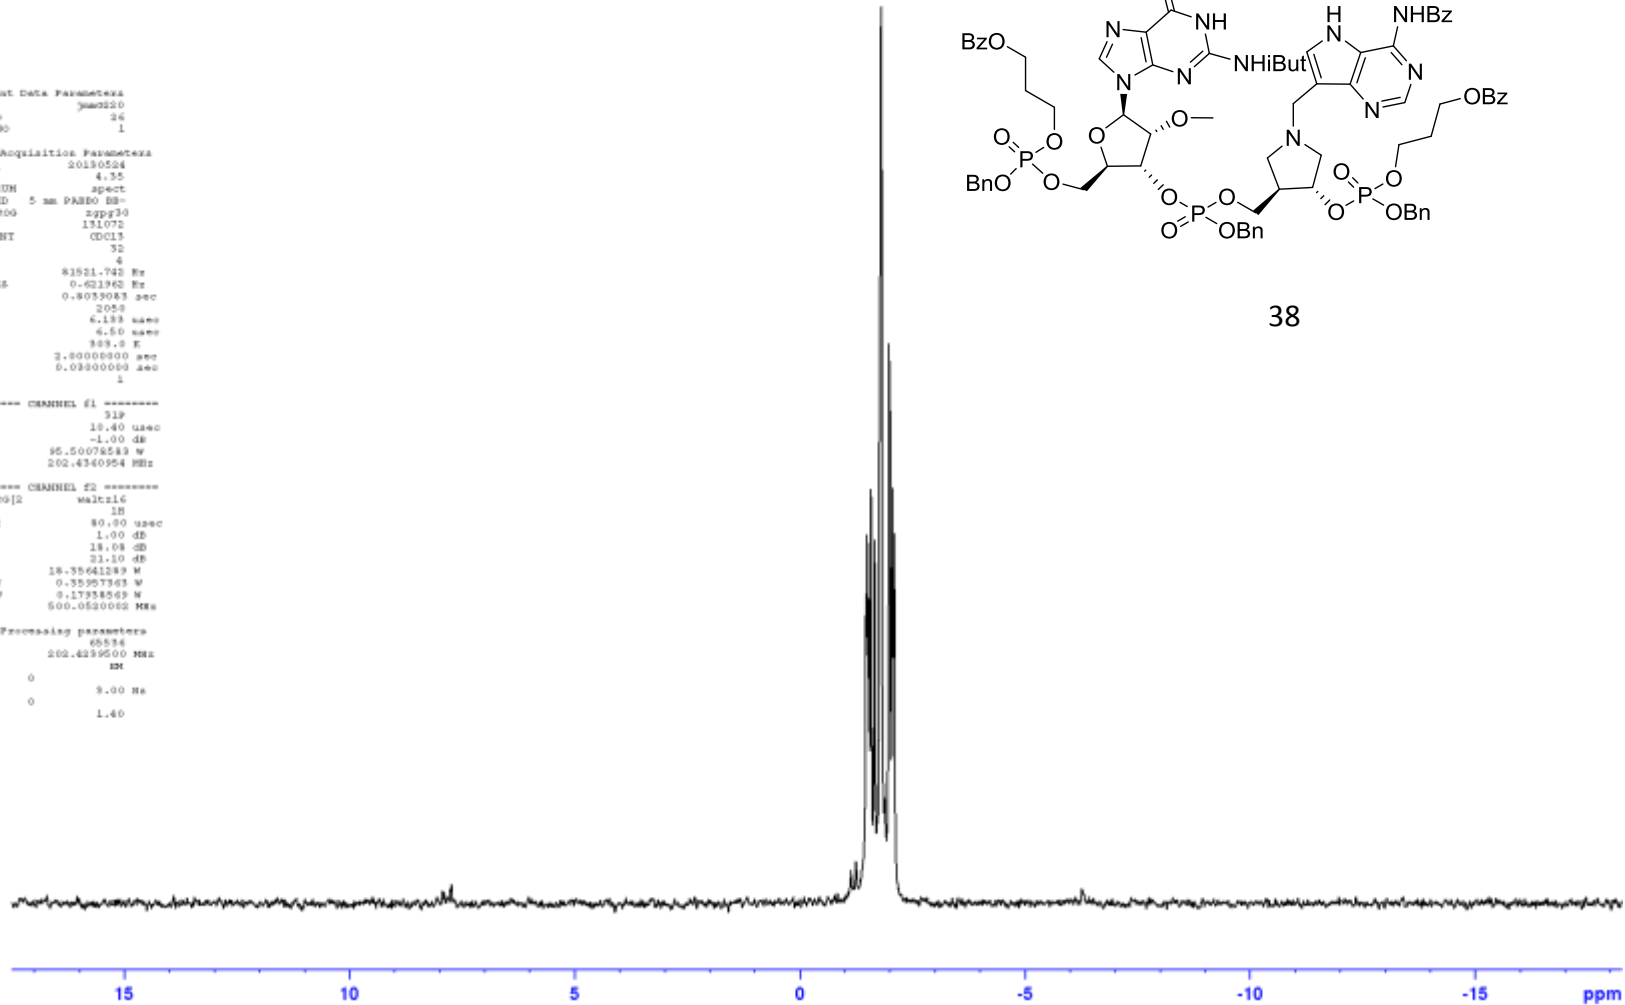

<sup>1</sup>H NMR  
500 MHz

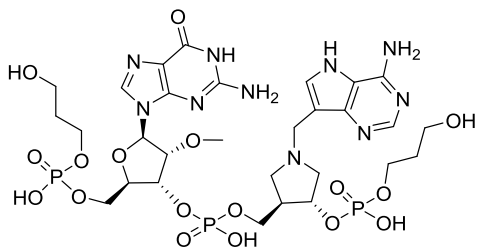

39

Current Data Parameters  
NAME JmmG225  
EXPNO 29  
PROCNO 1

F2 - Acquisition Parameters  
Date\_ 20130531  
Time 18.44  
INSTRUM spect  
PROBHD 5 mm PABBO BB-  
PULPROG zgpg30  
TD 45536  
SOLVENT H2O  
NS 32  
DS 2  
SWH 10302.198 Hz  
FIDRES 0.157199 Hz  
AQ 3.1806805 sec  
RG 361  
CW 48.533 usec  
DE 10.00 usec  
TE 303.4 K  
D1 1.0000000 sec  
TD0 1

----- CHANNEL f1 -----  
NUC1 1H  
P1 18.00 usec  
PL1 -3.00 dB  
PL12 23.55579943 M  
RFOL 499.8420867 MHz

F2 - Processing parameters  
SI 32768  
SF 499.8399663 MHz  
NM 8H  
SSB 0  
LA 0.39 Hz  
GB 0  
PC 1.00

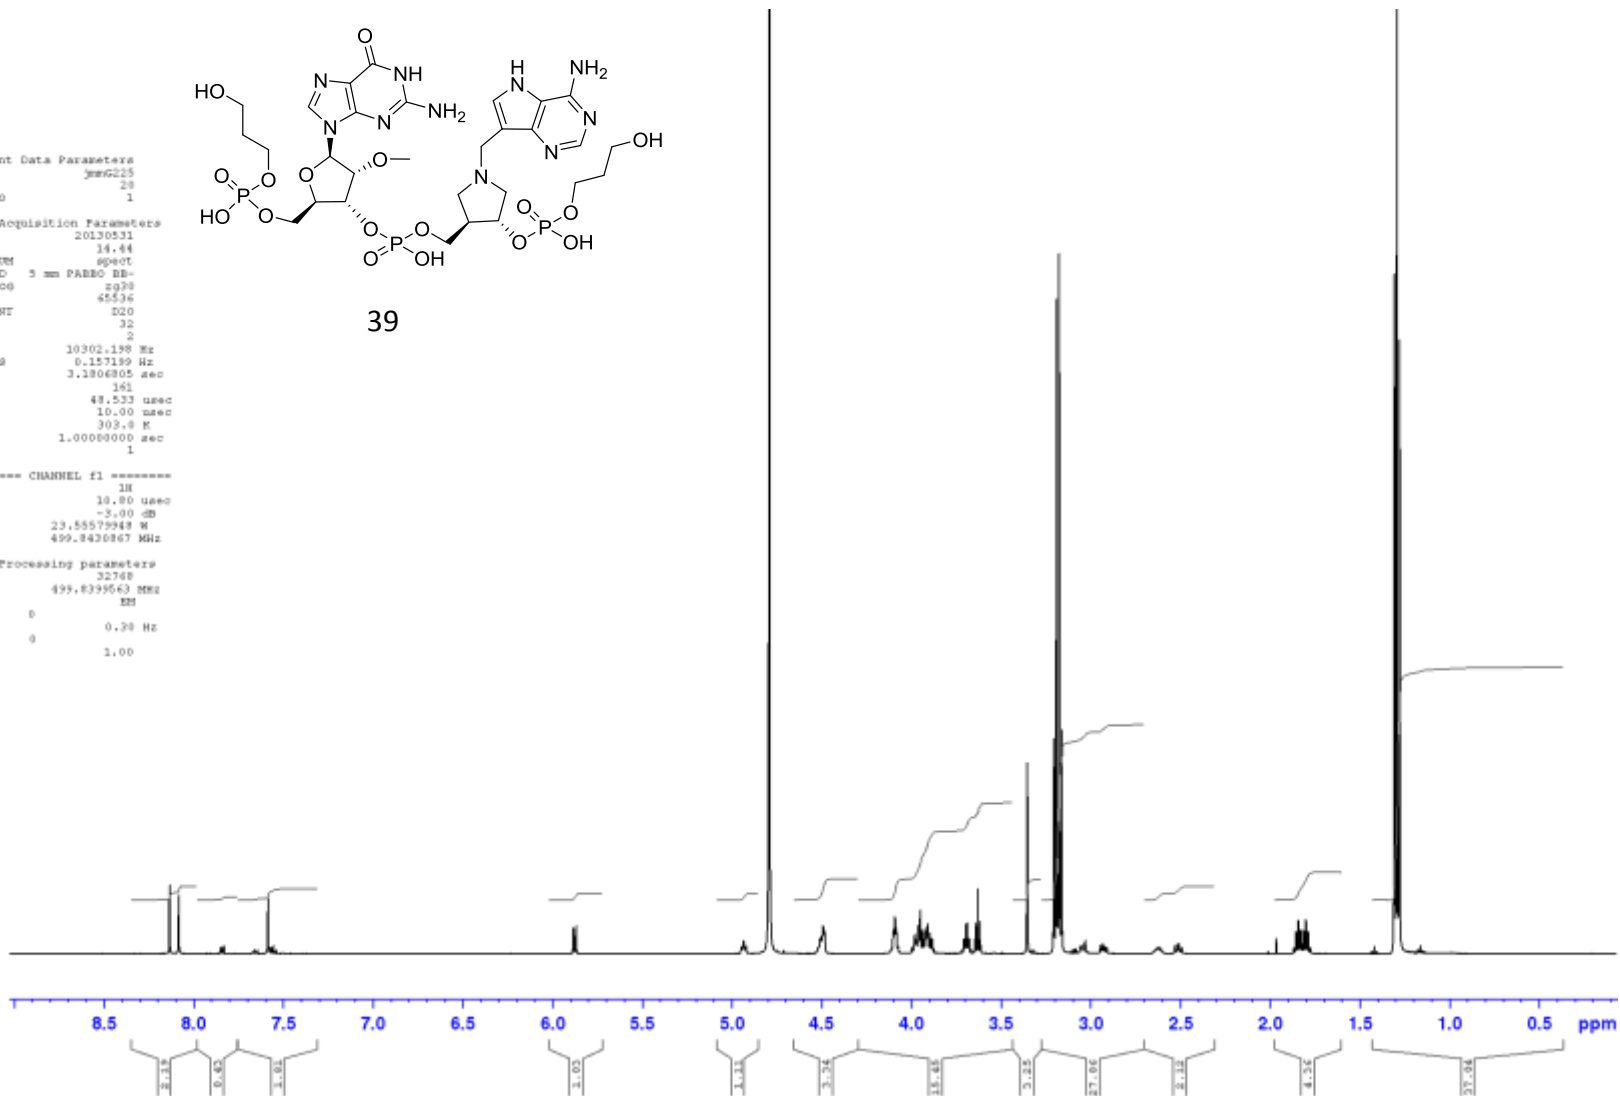

**<sup>13</sup>C NMR  
126 MHz**

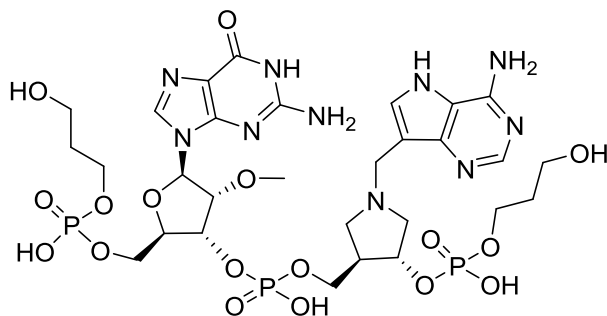

39

```
Current Data Parameters
NAME      jsm0215
EXPNO    21
PROCNO   1

F2 - Acquisition Parameters
Date_    20150531
Time     15.08
INSTRUM  spect
PROBHD   5 mm PABBO BB-
PULPROG  zgpg30
TD       65536
SOLVENT  D2O
NS       830
DS       4
SWH      31250.000 Hz
FIDRES   0.476837 Hz
AQ       1.0485760 sec
RG       2050
DW       18.000 usec
DE       10.000 usec
TE       303.0 K
D3       8.59000000 sec
D31      8.59000000 sec
TEO      1

----- CHANNEL f1 -----
NUC1     13C
P1       11.00 usec
P11      9.00 dB
P11W     31.7049027 W
SFO1     125.0984648 MHz

***** CHANNEL f2 *****
CPDPRG2  waltz16
NUC2     1H
PCPD2    80.00 usec
P12      -3.00 dB
P112     14.39 dB
P113     17.90 dB
P12W     29.65579948 W
P112W    0.43968320 W
P113W    0.19166875 W
SFO2     499.8419994 MHz

F2 - Processing parameters
SI       32768
SF       125.0984648 MHz
MCM      EM
ASB      0
LB       3.00 Hz
GB       0
PC       1.49
```

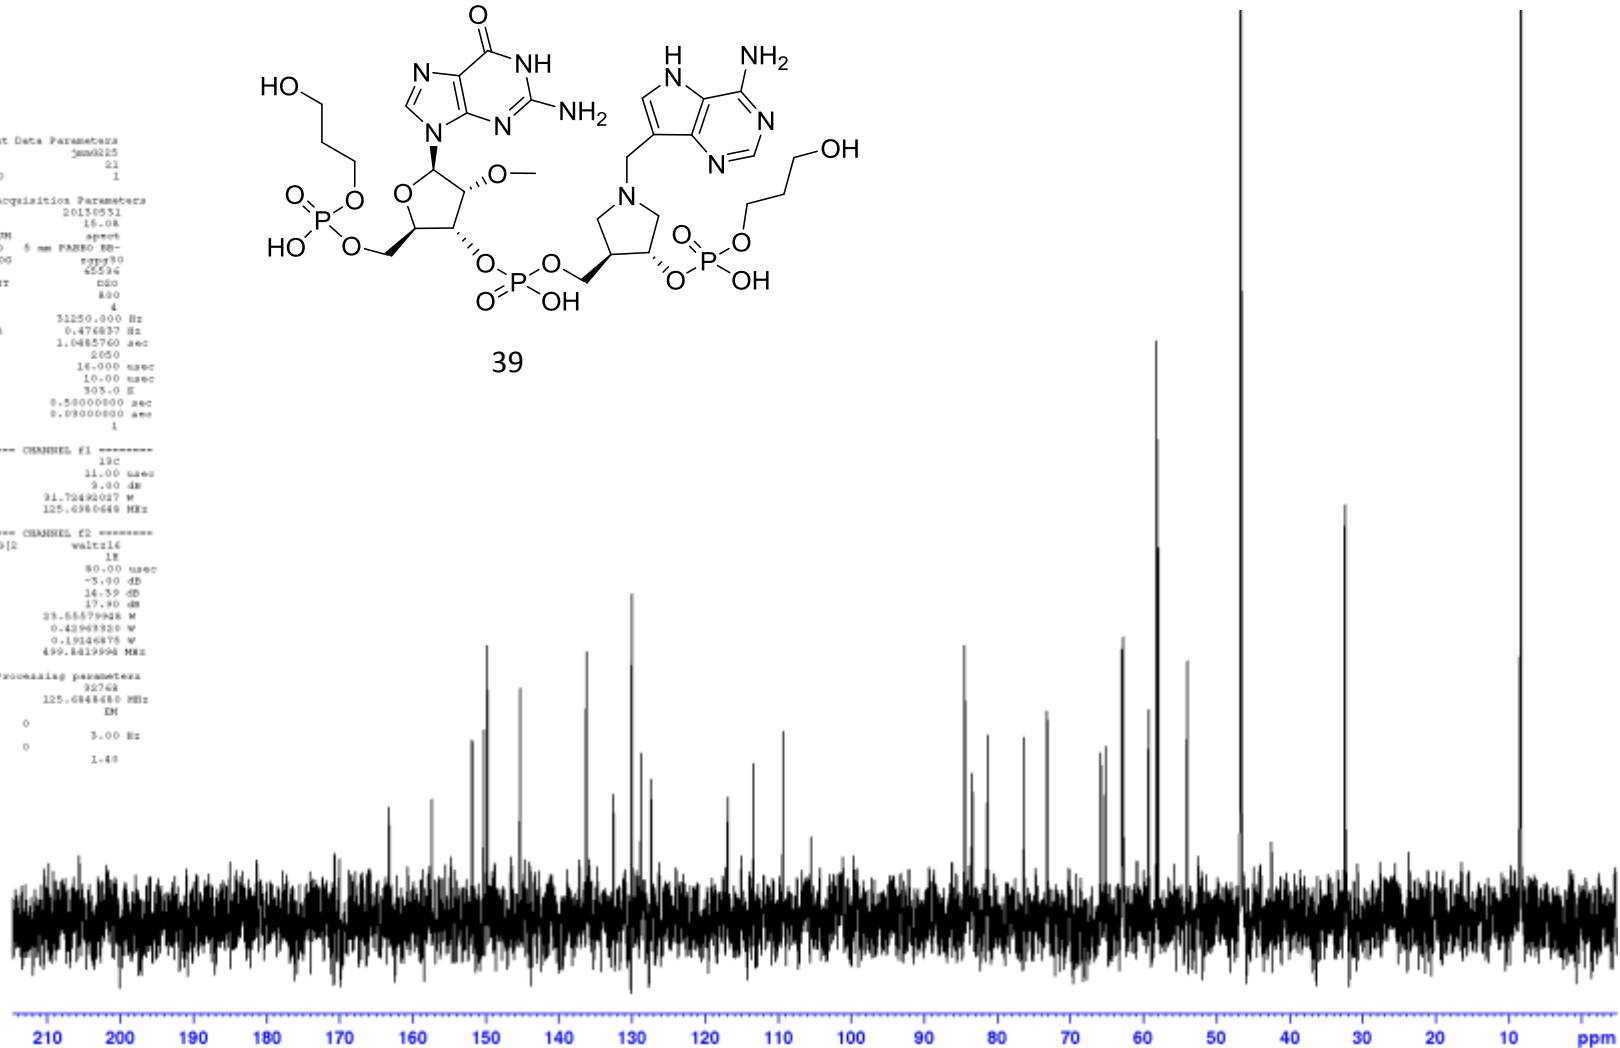

**<sup>31</sup>P NMR**  
**202 MHz**

Current Data Parameters  
NAME jsm025  
EXPNO 24  
PROCNO 1

F2 - Acquisition Parameters  
Date\_ 20150531  
Time 15:34  
INSTRUM spect  
PROBHD 5 mm PABBO BB-  
PULPROG zgpg30  
TD 131072  
SOLVENT D2O  
NS 32  
DS 4  
SWH 61521.742 Hz  
FIDRES 0.621962 Hz  
AQ 0.8039083 sec  
RG 250  
DW 6.133 usec  
DE 10.00 usec  
TE 305.0 K  
D3 2.0000000 sec  
D11 0.0900000 sec  
TEO 1

----- CHANNEL F1 -----  
NUC1 <sup>31</sup>P  
P1 20.40 usec  
P11 5.00 dB  
PL1W 43.1896925 W  
SFO1 202.3510846 MHz

\*\*\*\*\* CHANNEL F2 \*\*\*\*\*  
CHOPPRF2 waltz16  
NUC2 <sup>1</sup>H  
PCPD2 80.00 usec  
P12 -5.00 dB  
P112 14.59 dB  
P113 17.80 dB  
PL1W 29.65579948 W  
PL12W 0.43968320 W  
PL13W 0.19166875 W  
SFO2 499.8419994 MHz

F2 - Processing parameters  
SI 65596  
SF 202.3389410 MHz  
MEM 1M  
SAB 0  
LB 5.00 Hz  
GB 0  
PC 1.49

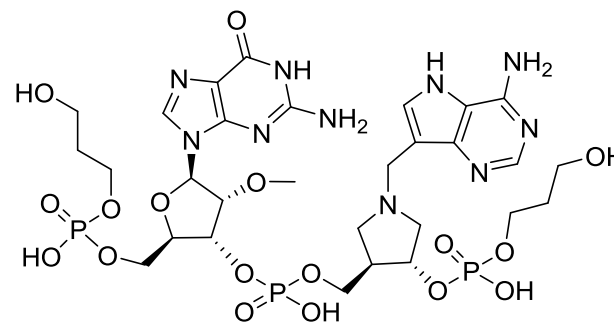

39

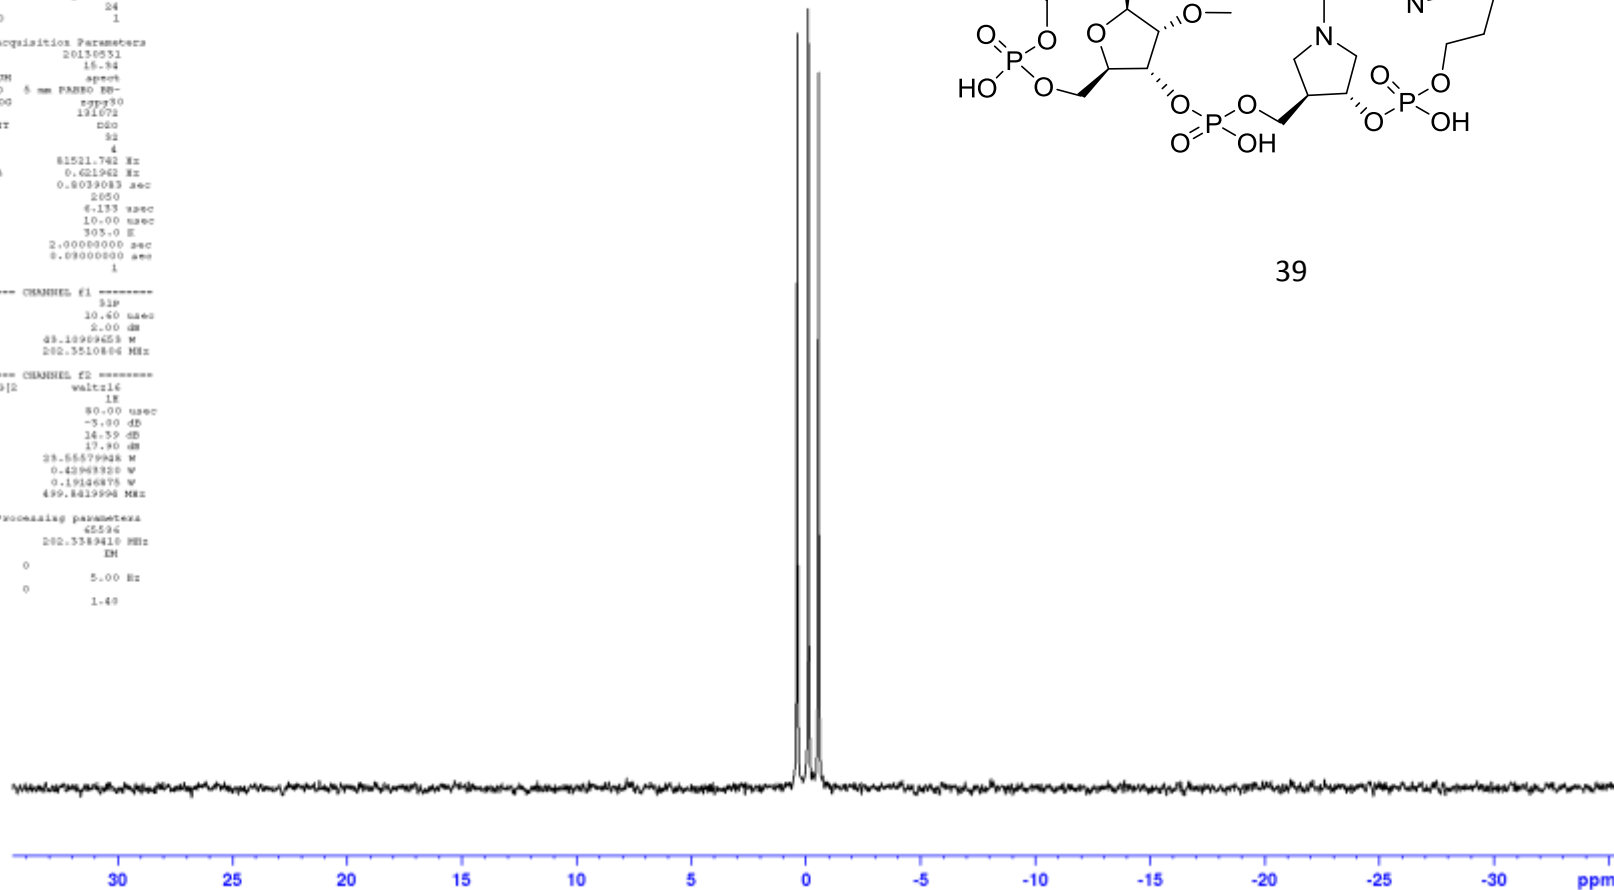



# HPLC

Data File D:\DATA\2013\MAY312013\20130531A 2013-05-31 11-10-59\067-0801.D  
 Sample Name: jmg225f15\_3

```

=====
Acq. Operator   : SYSTEM                      Seq. Line :    8
Acq. Instrument : LCMS                       Location  : Vial 67
Injection Date  : 5/31/2013 11:11:58 AM      Inj       :    1
                                           Inj Volume: 1.000 µl

Acq. Method    : D:\DATA\MAY312013\20130531A 2013-05-31 11-10-59\P1 T15 0-30ACN_ WFA MSJM.M
Last changed   : 5/31/2013 11:10:59 AM by SYSTEM
Analysis Method: D:\DATA\2013\MAY312013\20130531A 2013-05-31 11-10-59\P1 T15 0-30ACN_ WFA MSJM.M
                                           M (Sequence Method)
Last changed   : 5/31/2013 11:10:59 AM by SYSTEM
Additional Info: Peak(s) manually integrated
  
```

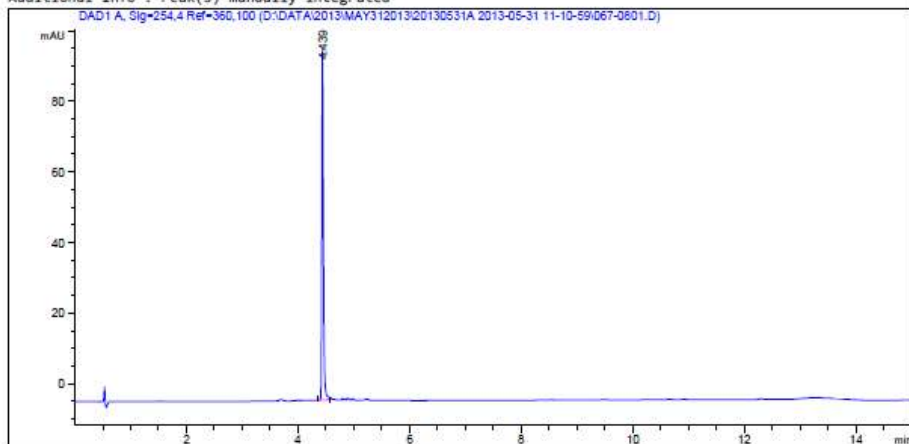

## Area Percent Report

```

Sorted By      : Signal
Multiplier     : 1.0000
Dilution       : 1.0000
Do not use Multiplier & Dilution Factor with ISTDs
  
```

Signal 1: DAD1 A, Sig=254,4 Ref=360,100

| Peak # | RetTime [min] | Type | Width [min] | Area [mAU*s] | Height [mAU] | Area %   |
|--------|---------------|------|-------------|--------------|--------------|----------|
| 1      | 4.439         | BV   | 0.0304      | 200.38489    | 99.75817     | 100.0000 |

Totals : 200.38489 99.75817

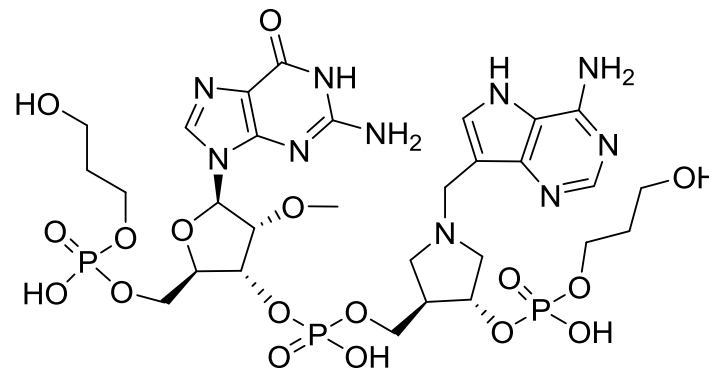

239



<sup>13</sup>C NMR  
126 MHz

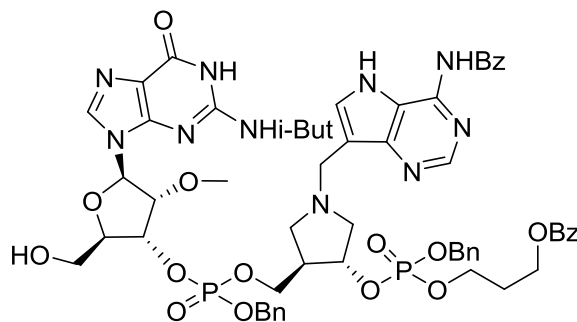

40

```
Current Data Parameters
NAME          jag254
EXPNO         11
PROCNO        1

F2 - Acquisition Parameters
Date_         20150924
Time          6.39
INSTRUM       spect
PROBHD        5 mm PABBO BB-
PULPROG       zgpg30
TD            65536
SOLVENT       cpd13
NS            19680
DS            4
SWH           31250.000 Hz
FIDRES        0.476837 Hz
AQ            1.0485760 sec
RG            228
DW            16.000 usec
DE            15.08 usec
TE            305.0 K
D3            8.59000000 sec
D11           8.09000000 sec
TEO           1

----- CHANNEL f1 -----
NUC1          13C
P1            9.00 usec
P11           -1.00 dB
P11W         128.9428884 W
SFO1          125.7508755 MHz

***** CHANNEL f2 *****
CPDPRG2       waltz16
NUC2          1H
PCPD2         80.00 usec
P12           1.00 dB
P12W         19.38 dB
P13          21.10 dB
P13W         18.95441289 W
P13M         0.35967363 W
P13W         0.17983669 W
SFO2          500.0520002 MHz

F2 - Processing parameters
SI            32768
SF           125.7376712 MHz
WDW           EM
SSB           0
LB            3.00 Hz
GB            0
PC            1.49
```

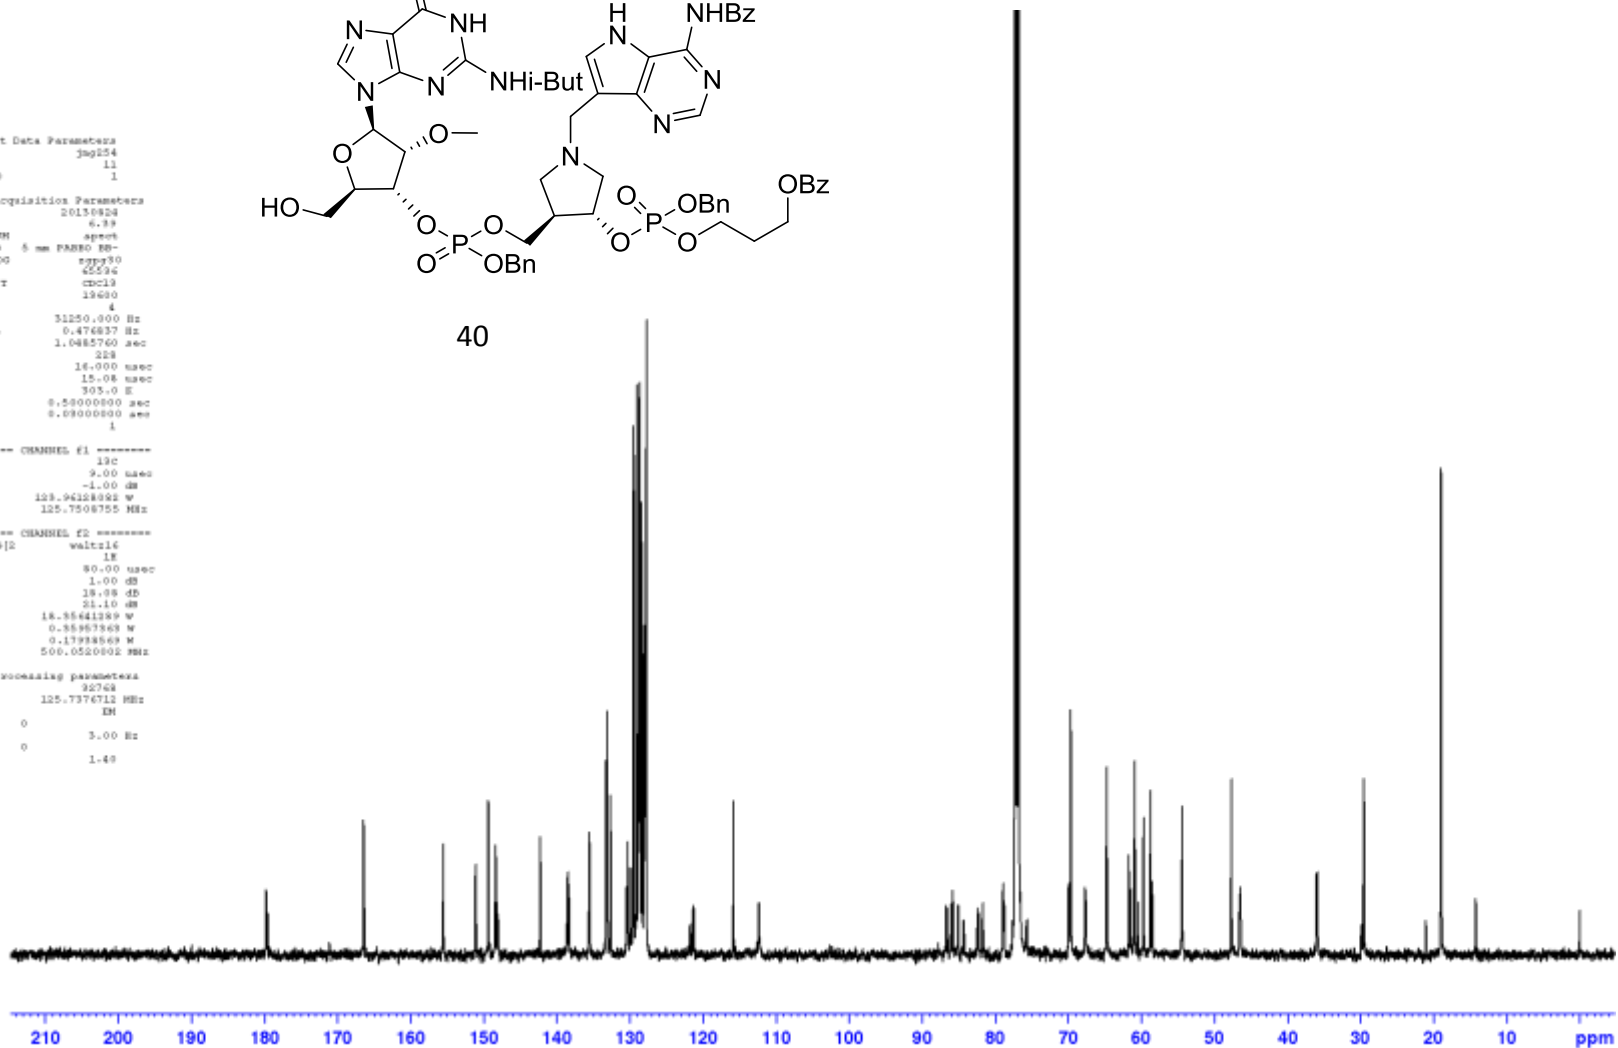

<sup>1</sup>H NMR  
500 MHz

Current Data Parameters  
 NAME Jmg266  
 EXPNO 10  
 PROCNO 1

F2 - Acquisition Parameters  
 Date\_ 2013019  
 Time 17:53  
 INSTRUM spect  
 PROBRD 5 mm PABBO BB-  
 PULPROG zgpg30  
 TD 45536  
 SOLVENT H2O  
 NS 128  
 DS 2  
 SWH 10336.578 Hz  
 FIDRES 0.157632 Hz  
 AQ 3.1719425 sec  
 RG 344  
 CW 49.409 usec  
 DE 6.50 usec  
 TE 303.2 K  
 DL 1.0000000 sec  
 TDO 1

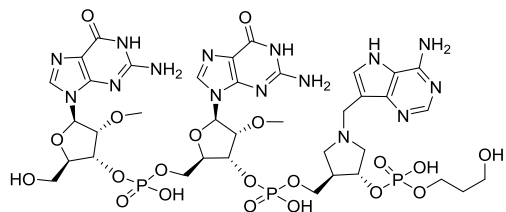

41

----- CHANNEL f1 -----  
 NUCL 1H  
 P1 11.20 usec  
 P11 1.00 dB  
 PL1W 18.35641289 W  
 SFO1 500.0530880 MHz

F2 - Processing parameters  
 SI 32768  
 SF 500.0499602 MHz  
 NUC1 1H  
 SFO 500.0530880 MHz  
 LA 0.39 Hz  
 GB 0  
 PC 1.00

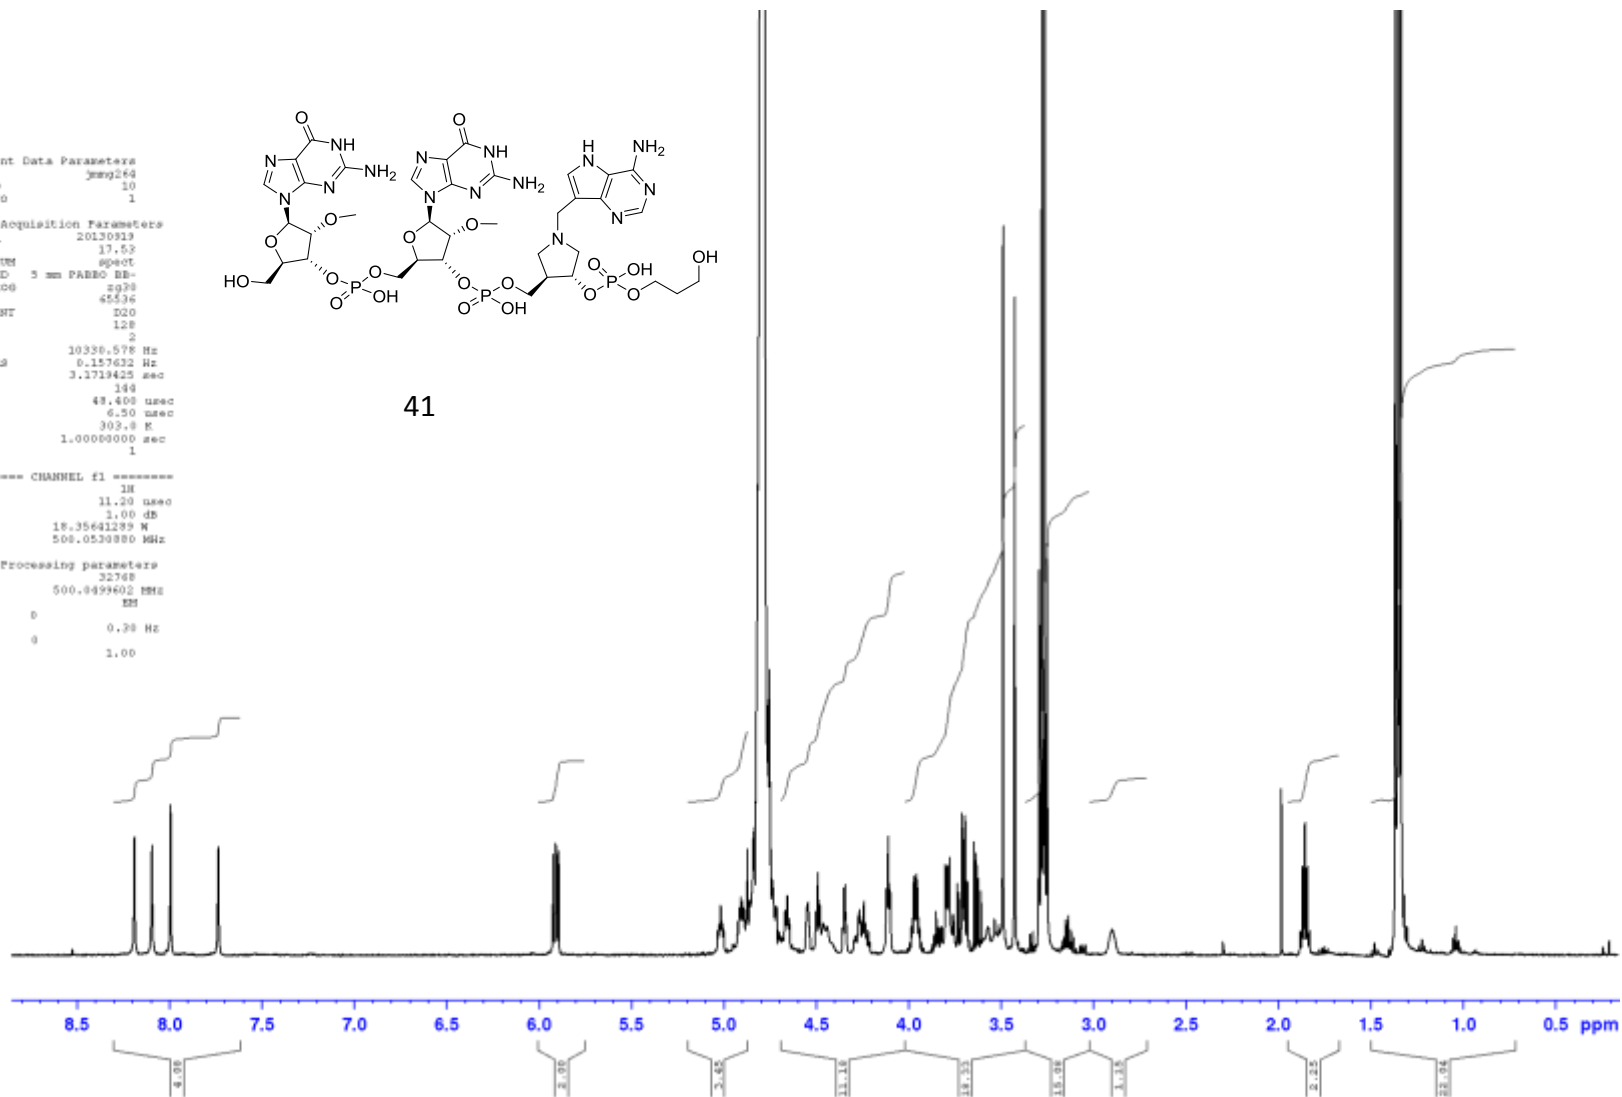

**<sup>31</sup>P NMR  
202 MHz**

```
Current Data Parameters
NAME          3mg264
EXPNO        12
PROCNO       1

F2 - Acquisition Parameters
Date_        2013019
Time         19:47
INSTRUM      spect
PROBHD       5 mm PABBO BB-
PULPROG      zgpg30
TD           131072
SOLVENT      D2O
RG           300
AQ           1.60
DS           4
SWH          81921.742 Hz
FIDRES       0.621962 Hz
AQ           0.8039083 sec
RG           2058
DE           6.123 usec
TE           4.50 usec
TE           898.9 K
D1           3.80000000 sec
D11          0.09900000 sec
TE0          1

----- CHANNEL f1 -----
NUC1          31P
P1           18.40 usec
P11          -1.00 dB
P1LW        55.50078583 W
SFO1         202.4340954 MHz

----- CHANNEL f2 -----
CHOPPRG2     mltiplc
NUC2          1H
PCPD2        80.00 usec
P12          1.00 dB
P1L2         19.08 dB
P1L3         21.10 dB
P1LW         18.35641289 W
P1L2W        0.35907363 W
P1L3W        0.17948569 W
SFO2         500.0520062 MHz

F2 - Processing parameters
SI           65536
SF           202.4239500 MHz
NCM          324
ZSN          0
LB           3.00 Hz
GB           0
PC           1.40
```

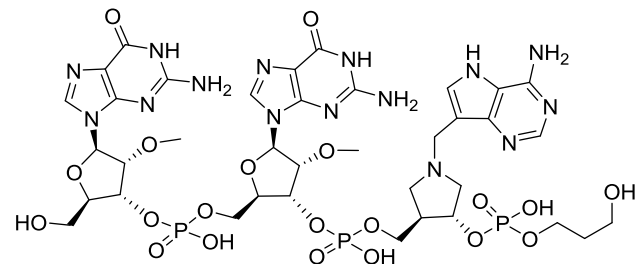

41

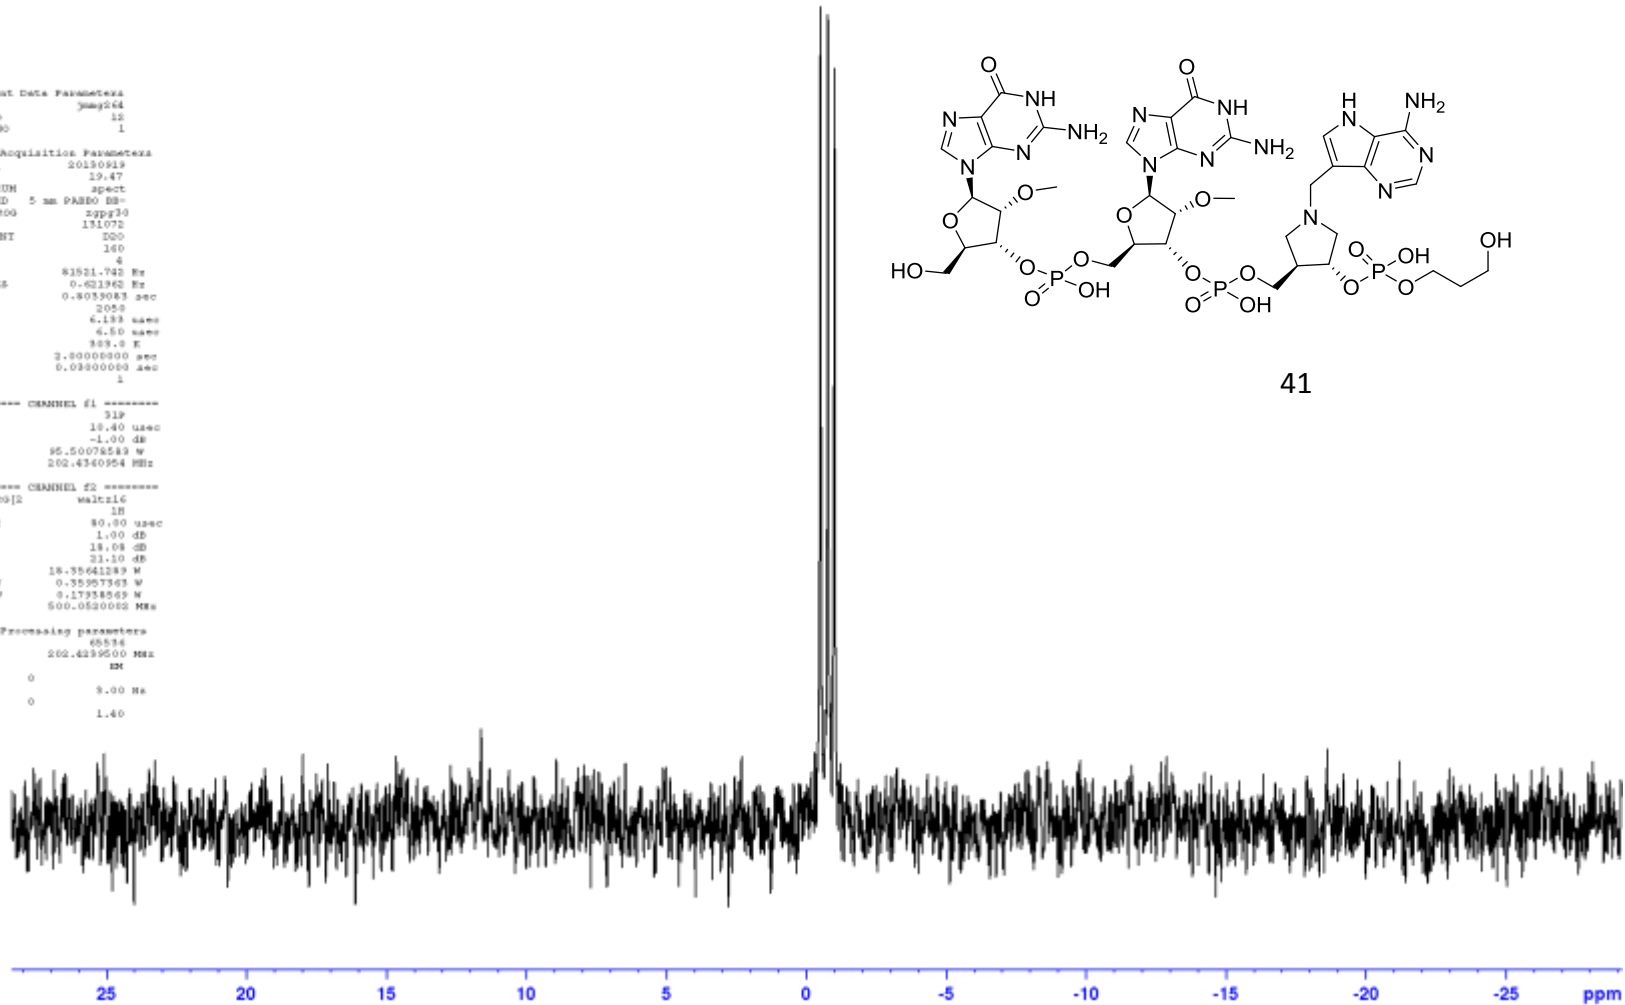

# HPLC

Data File D:\DATA\2013\SEPT182013\20130918A 2013-09-18 08-56-41\JMMG264PREP1.D  
 Sample Name: jmmg264prep

```

=====
Acq. Operator   : SYSTEM                      Seq. Line :    4
Acq. Instrument : LCMS                      Location  : Vial 32
Injection Date  : 9/18/2013 9:28:16 AM      Inj       :    1
                                           Inj Volume: 1.000 µl
Acq. Method    : D:\DATA\SEPT182013\20130918A 2013-09-18 08-56-41\P1 T9 AW BM FA 5-50M G5H1 3-15.M
Last changed   : 9/18/2013 8:56:41 AM by SYSTEM
Analysis Method : D:\DATA\2013\SEPT182013\20130918A 2013-09-18 08-56-41\P1 T9 AW BM FA 5-50M G5H1 3-15.M (Sequence Method)
Last changed   : 9/18/2013 8:56:41 AM by SYSTEM
Method Info    : Position 1; Poroshell 120 EC-C18 3x50mm 2.7µm; A:Water+0.1FA, B:MeOH; T0-5min 5-50%B; T5-6 min 50%B; Flow 0.5 mL/min; m/z 100-1000
  
```

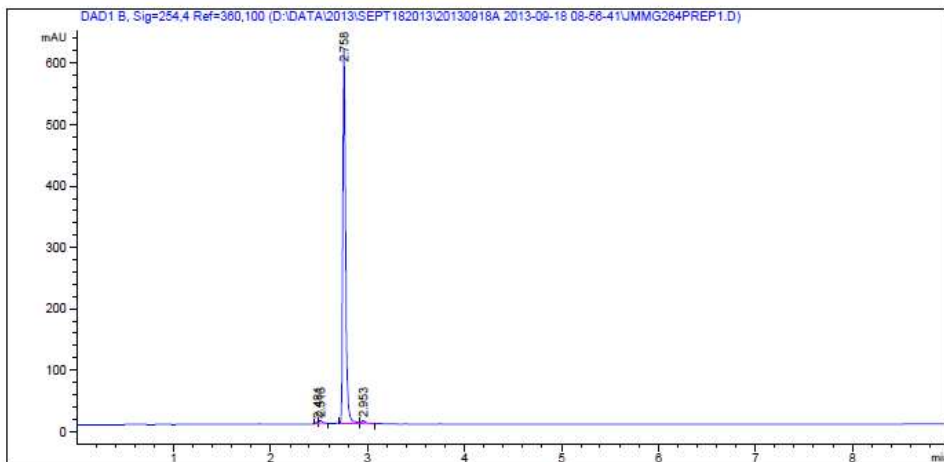

## Area Percent Report

```

=====
Sorted By      :      Signal
Multiplier     :      1.0000
Dilution       :      1.0000
Do not use Multiplier & Dilution Factor with ISTDs
  
```

Signal 1: DAD1 B, Sig=254,4 Ref=360,100

Data File D:\DATA\2013\SEPT182013\20130918A 2013-09-18 08-56-41\JMMG264PREP1.D  
 Sample Name: jmmg264prep

| Peak #   | RetTime [min] | Type | Width [min] | Area [mAU*s] | Height [mAU] | Area %  |
|----------|---------------|------|-------------|--------------|--------------|---------|
| 1        | 2.481         | BV   | 0.0247      | 6.25826      | 3.90068      | 0.4869  |
| 2        | 2.516         | VB   | 0.0397      | 14.26352     | 5.08144      | 1.1096  |
| 3        | 2.758         | VV   | 0.0309      | 1248.91406   | 609.41754    | 97.1602 |
| 4        | 2.953         | VB   | 0.0476      | 15.98195     | 4.70608      | 1.2433  |
| Totals : |               |      |             | 1285.41780   | 623.10574    |         |

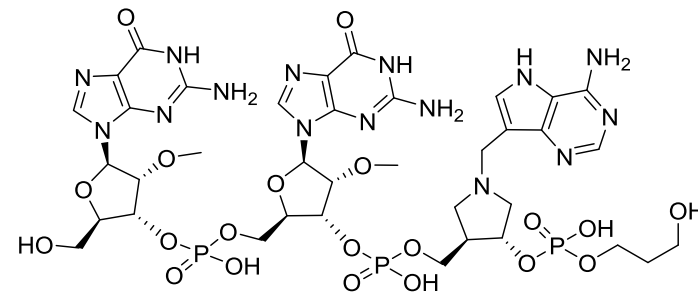

41

<sup>1</sup>H NMR  
500 MHz

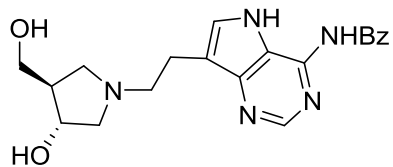

42

Current Data Parameters  
NAME Jm0269  
EXPNO 10  
PROCNO 1

F2 - Acquisition Parameters  
Date\_ 20131008  
Time 15.09  
INSTRUM spect  
PROBHD 5 mm PABBO BBO  
PULPROG zgpg30  
TD 65536  
SOLVENT CDCl3+MeOD  
NS 32  
DS 2  
SWH 10302.138 Hz  
FIDRES 0.157139 Hz  
AQ 3.1804805 sec  
RG 321  
CW 43.523 usec  
DE 10.00 usec  
TE 300.0 K  
D1 1.0000000 sec  
YD0 1

----- CHANNEL f1 -----  
NUC1 1H  
P1 10.00 usec  
PL1 -2.00 dB  
FLIN 23.55579948 M  
SFO1 499.8420867 MHz

F2 - Processing parameters  
SI 32768  
SF 499.8422868 MHz  
NUC 1H  
SSB 0  
LB 0.20 Hz  
GB 0  
PC 1.00

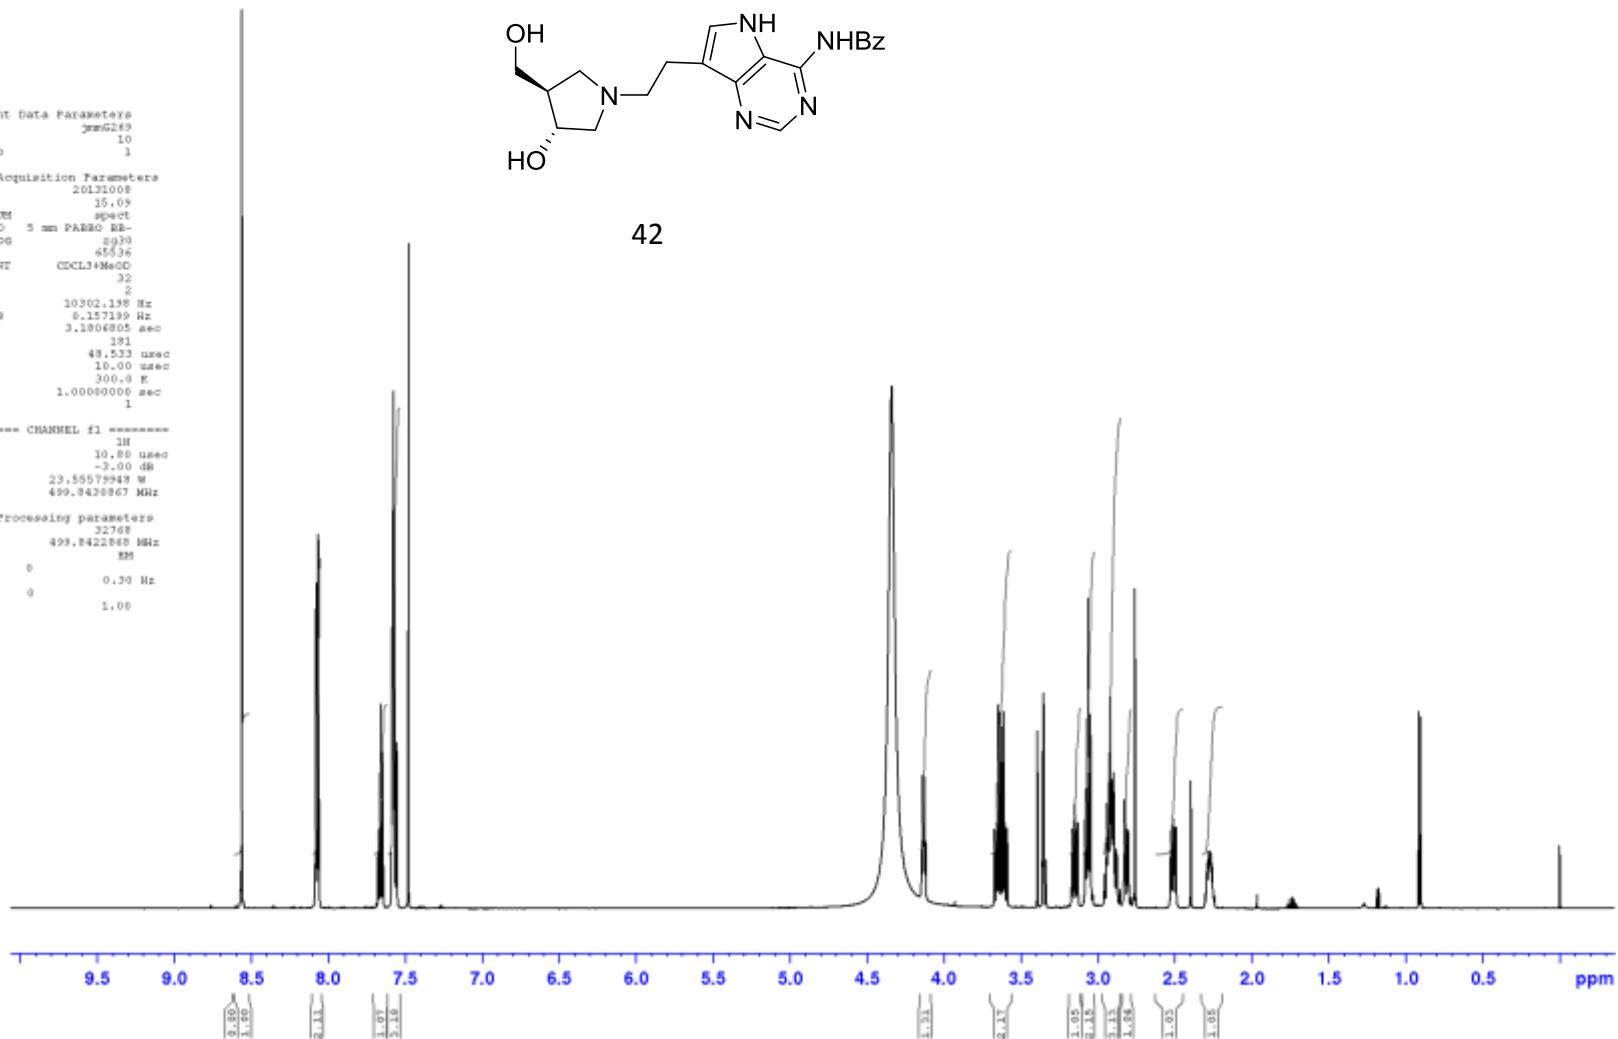

<sup>13</sup>C NMR  
126 MHz

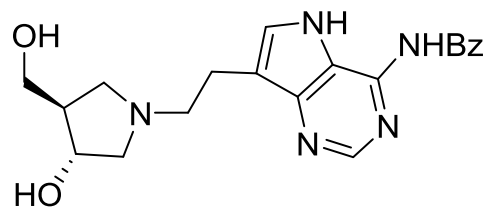

42

```
Current Data Parameters
NAME          jsm0269
EXPNO        11
PROCNO       1

F2 - Acquisition Parameters
Date_        20131004
Time         15.33
INSTRUM      spect
PROBHD       5 mm PABBO BB-
PULPROG      zgpg30
TD           65536
SOLVENT      CDCl3+meqo
NS           830
DS           4
SWH          31250.000 Hz
FIDRES      0.476837 Hz
AQ          1.0485760 sec
RG          2050
DW          18.000 usec
DE          10.000 usec
TE          303.0 K
D3          0.58000000 sec
D11         0.09000000 sec
TEO         1

----- CHANNEL f1 -----
NUC1         13C
P1          11.00 usec
P11         9.00 dB
P11M       31.7049027 W
SFO1        125.0984648 MHz

***** CHANNEL f2 *****
CPOFPRG2    waltz16
NUC2         1H
PCPD2       80.00 usec
P12         -3.00 dB
P112        14.39 dB
P113        17.90 dB
P12M       29.65579928 W
P112M      0.43969320 W
P113M      0.19166875 W
SFO2        499.8419994 MHz

F2 - Processing parameters
SI          32768
SF          125.0954869 MHz
MCM         EM
ASB         0
LB          3.00 Hz
GB          0
PC          1.49
```

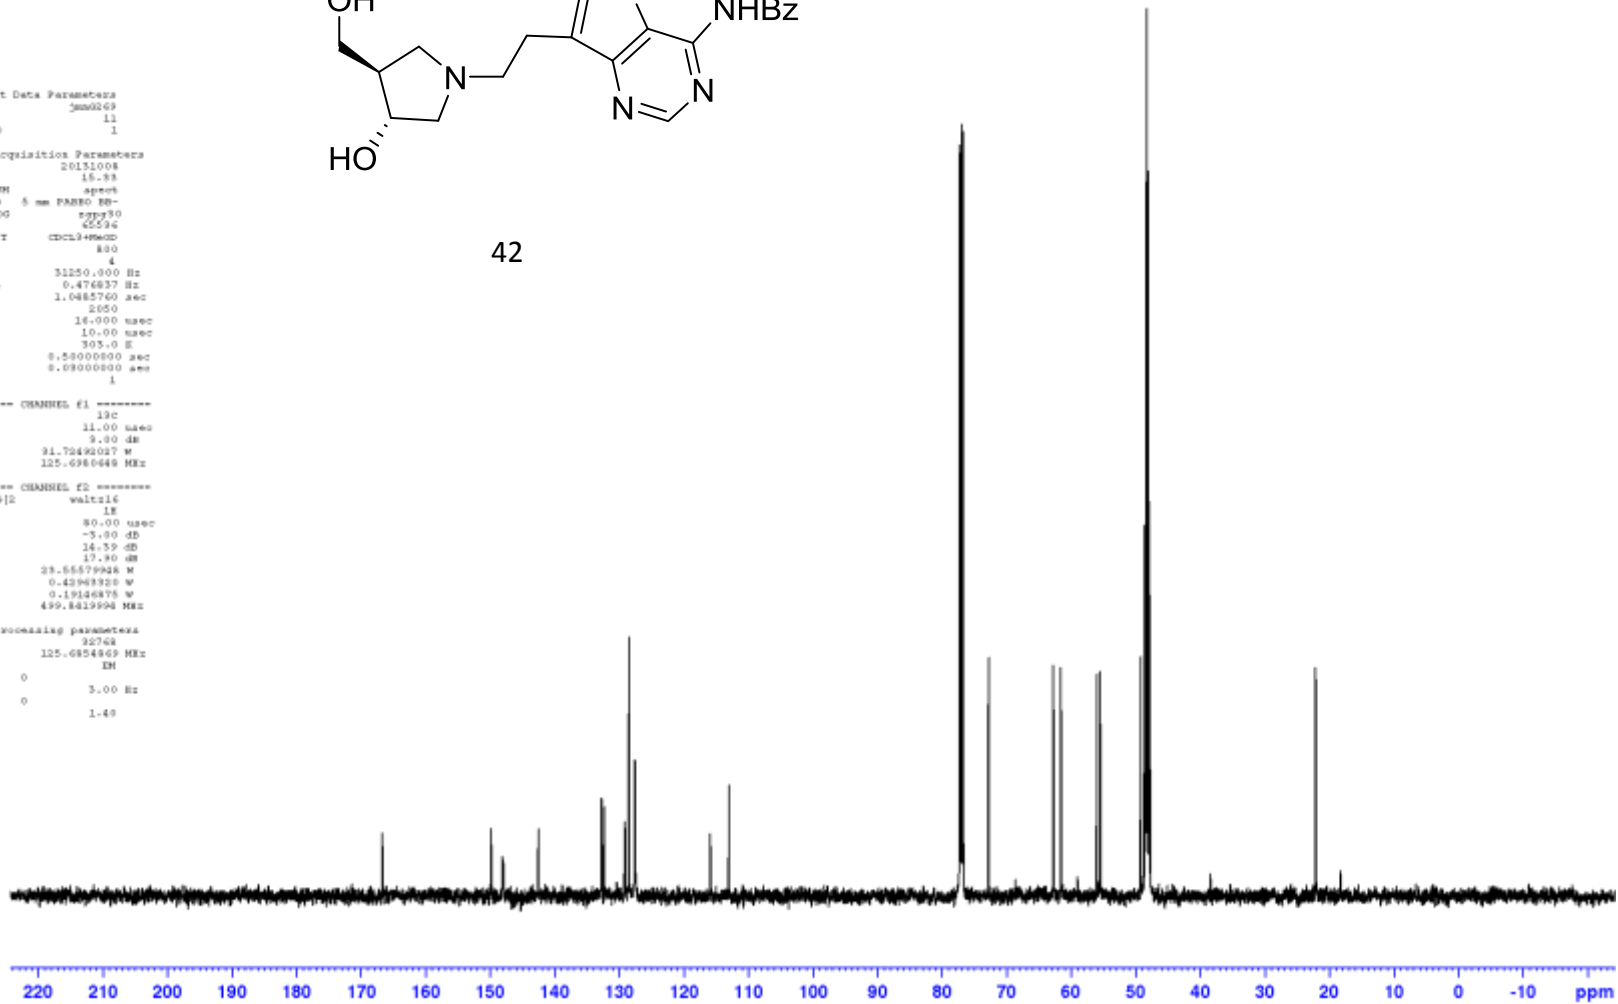



<sup>1</sup>H NMR  
500 MHz

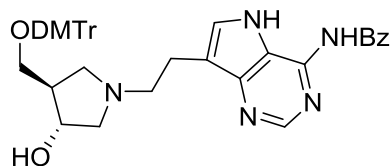

43

Current Data Parameters  
NAME jmg0271  
EXPNO 10  
PROCNO 1

F2 - Acquisition Parameters  
Date\_ 20131011  
Time 14.30  
INSTRUM spect  
PROBHD 5 mm PABBO BB-  
PULPROG zg30  
TD 45536  
SOLVENT CDCl3  
NS 32  
DS 2  
SWH 10302.198 Hz  
FIDRES 0.157139 Hz  
AQ 3.1806305 sec  
RG 228  
DM 43.533 usec  
DE 10.00 usec  
TE 302.8 K  
D1 1.0000000 sec  
TD0 1

===== CHANNEL f1 =====  
NUC1 1H  
P1 10.00 usec  
PL1 -3.00 dB  
PL1W 23.55579948 W  
SFO1 499.8420867 MHz

F2 - Processing parameters  
S2 32768  
SF 499.8400127 MHz  
WDW EM  
SSB 0  
LB 0.39 Hz  
GB 0  
FC 1.00

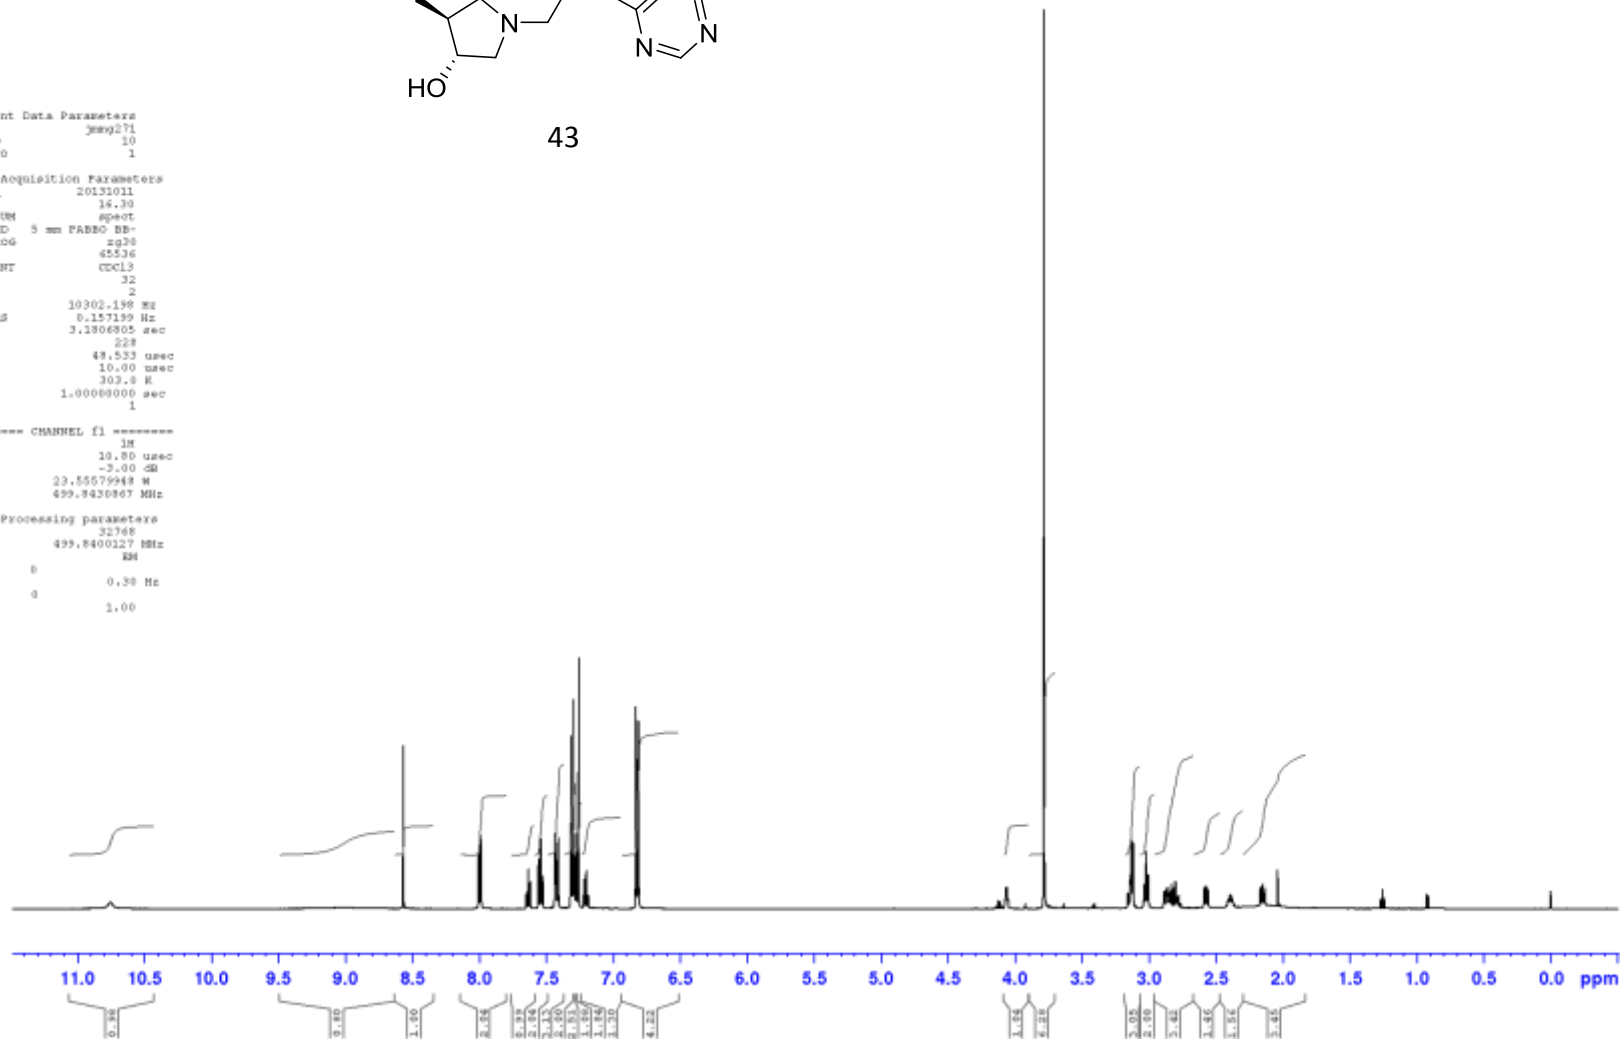

<sup>13</sup>C NMR  
126 MHz

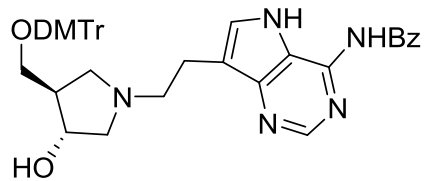

43

```
Current Data Parameters
NAME      Jmg0271
EXPNO     11
PROCNO    1

F2 - Acquisition Parameters
Date_     20131011
Time      16.52
INSTRUM   spect
PROBHD    5 mm PABBO BB-
PULPROG   zgpg30
TD         65536
SOLVENT   cpd13
NS         830
DS         4
SWH        31250.000 Hz
FIDRES    0.476837 Hz
AQ         1.0485760 sec
RG         2050
DW         16.000 usec
DE         10.000 usec
TE         303.0 K
D3         0.59000000 sec
D11        0.09000000 sec
TEO        1

----- CHANNEL f1 -----
NUC1       13C
P1         11.00 usec
P11        9.00 dB
P11M       31.7049027 W
SFO1       125.0980648 MHz

***** CHANNEL f2 *****
CPDPRG2    waltz16
NUC2       1H
PCPD2     80.00 usec
P12        -3.00 dB
P112       14.39 dB
P113       17.90 dB
P12M       29.65579948 W
P112M      0.43969320 W
P113M      0.19106875 W
SFO2       499.8419994 MHz

F2 - Processing parameters
SI         32768
SF         125.0984680 MHz
MCM        EM
ASB         0
LB          3.00 Hz
GB          0
PC          1.49
```

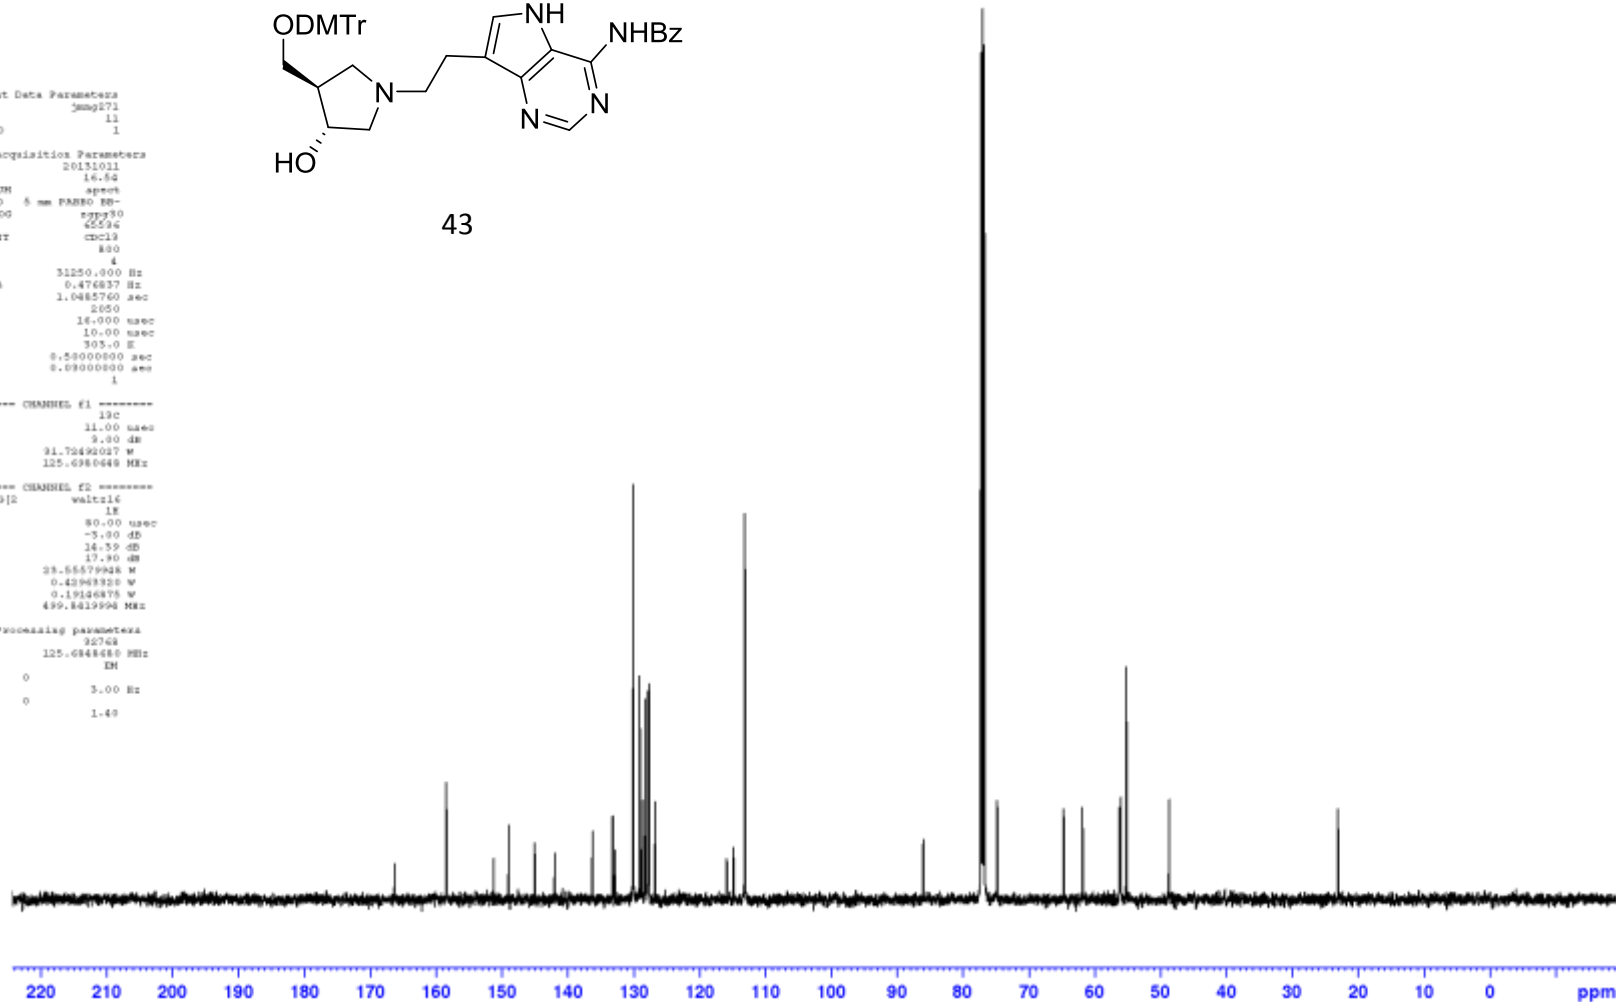



**<sup>13</sup>C NMR  
126 MHz**

```

Current Data Parameters
NAME      Jmgg27C
EXPNO    11
PROCNO   1
-----
F2 - Acquisition Parameters
Date_    20131017
Time     9.14
INSTRUM  spect
PROBHD   5 mm PABBO BB-
PULPROG  zgpg30
TD       65536
SOLVENT  cpd13
NS       830
DS       4
SFO      125000.000 Hz
FIDRES   0.476837 Hz
AQ       1.0485760 sec
RG       2050
DM       18.000 usec
DE       10.00 usec
TE       299.8 K
D3       0.50000000 sec
D11      0.09000000 sec
TEO      1
----- CHANNEL f1 -----
NUC1     13C
P1       11.00 usec
P11      9.00 dB
P11M     31.7049027 W
SFO1     125.0980648 MHz
----- CHANNEL f2 -----
CPDPRG2  waltz16
NUC2     1H
PCPD2    80.00 usec
P12      -3.00 dB
P112     14.39 dB
P113     17.90 dB
P12M     29.65579948 W
P112M    0.42968320 W
P113M    0.19186875 W
SFO2     499.8419994 MHz
-----
F2 - Processing parameters
SI       32768
SF       125.0984680 MHz
MCM      IM
ASB      0
LB       3.00 Hz
GB       0
PC       1.49
  
```

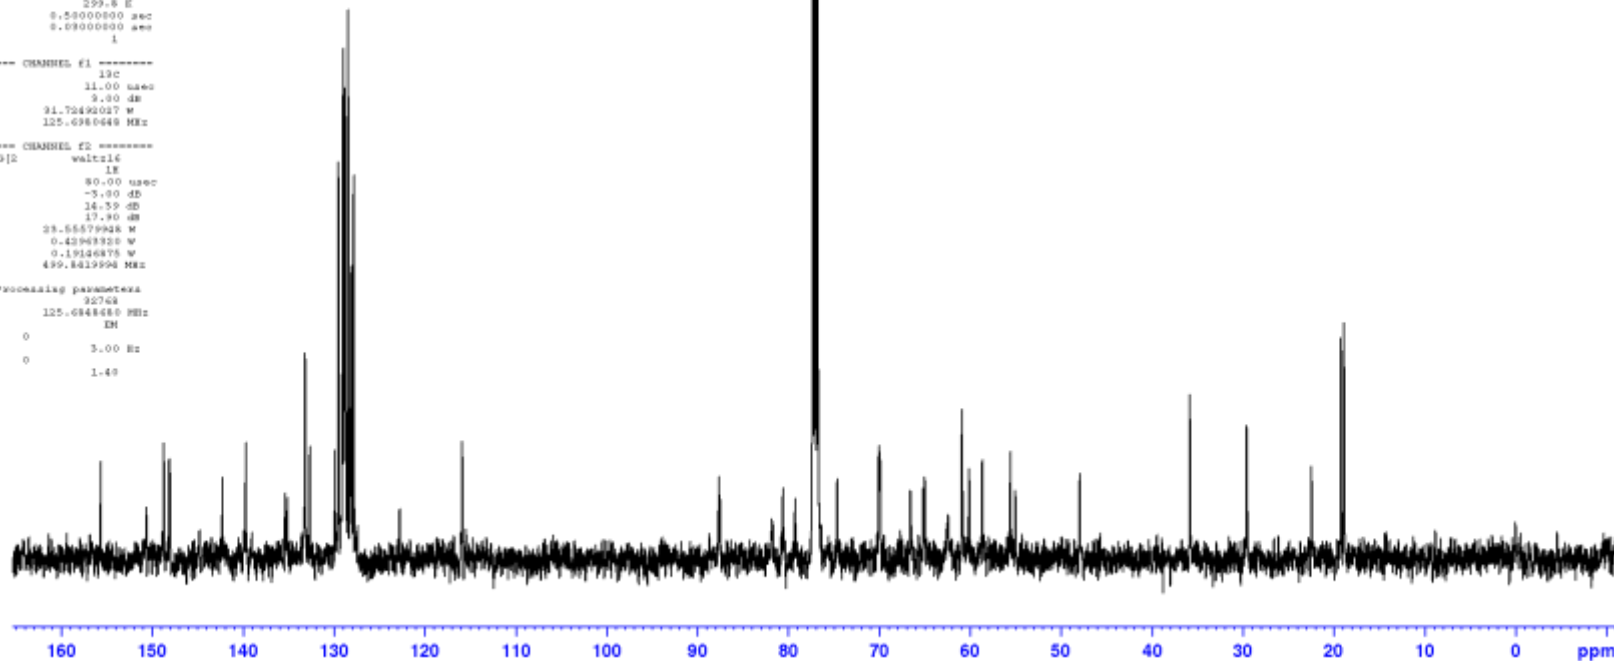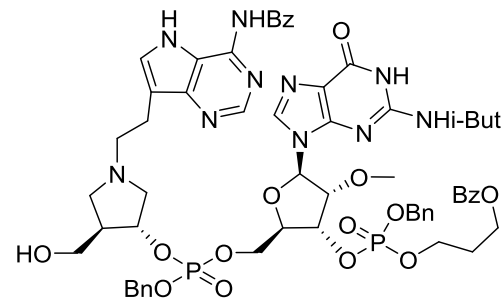

**<sup>31</sup>P NMR  
202 MHz**

```
Current Data Parameters
NAME      smg27c
EXPNO    23
PROCNO   1

F2 - Acquisition Parameters
Date_    20131017
Time     10.27
INSTRUM  spect
PROBHD   5 mm PABBO BB-
PULPROG  zgpg30
TD       134072
SOLVENT  cdcl3
NS       32
DS       4
SFO      61521.742 Hz
FIDRES   0.621962 Hz
AQ       0.8039083 sec
RG       2550
DW       6.133 usec
DE       10.00 usec
TE       299.3 K
D3       2.00000000 sec
D11      0.09000000 sec
TEO      1
```

```
----- CHANNEL f1 -----
NUC1     31p
P1       10.40 usec
P11      5.00 dB
P11W    43.18969458 W
SFO1     202.3510846 MHz
```

```
***** CHANNEL f2 *****
CPCPFGP2 waltz16
NUC2     1H
PCPD2    80.00 usec
P12      -5.00 dB
P112     14.39 dB
P113     17.90 dB
P12W    29.65579948 W
P112W   0.42968320 W
P113W   0.19136875 W
SFO2     499.8419994 MHz
```

```
F2 - Processing parameters
SI       65536
SF       202.338410 MHz
MCM      IM
SAB      0
LB       5.00 Hz
GB       0
PC       1.40
```

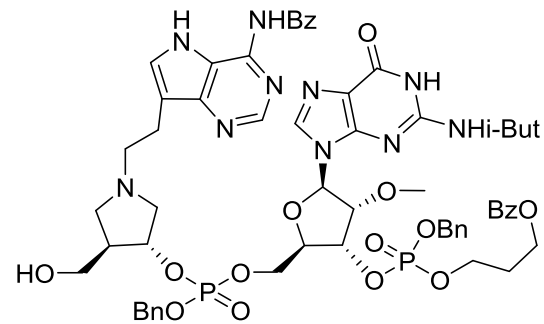

44

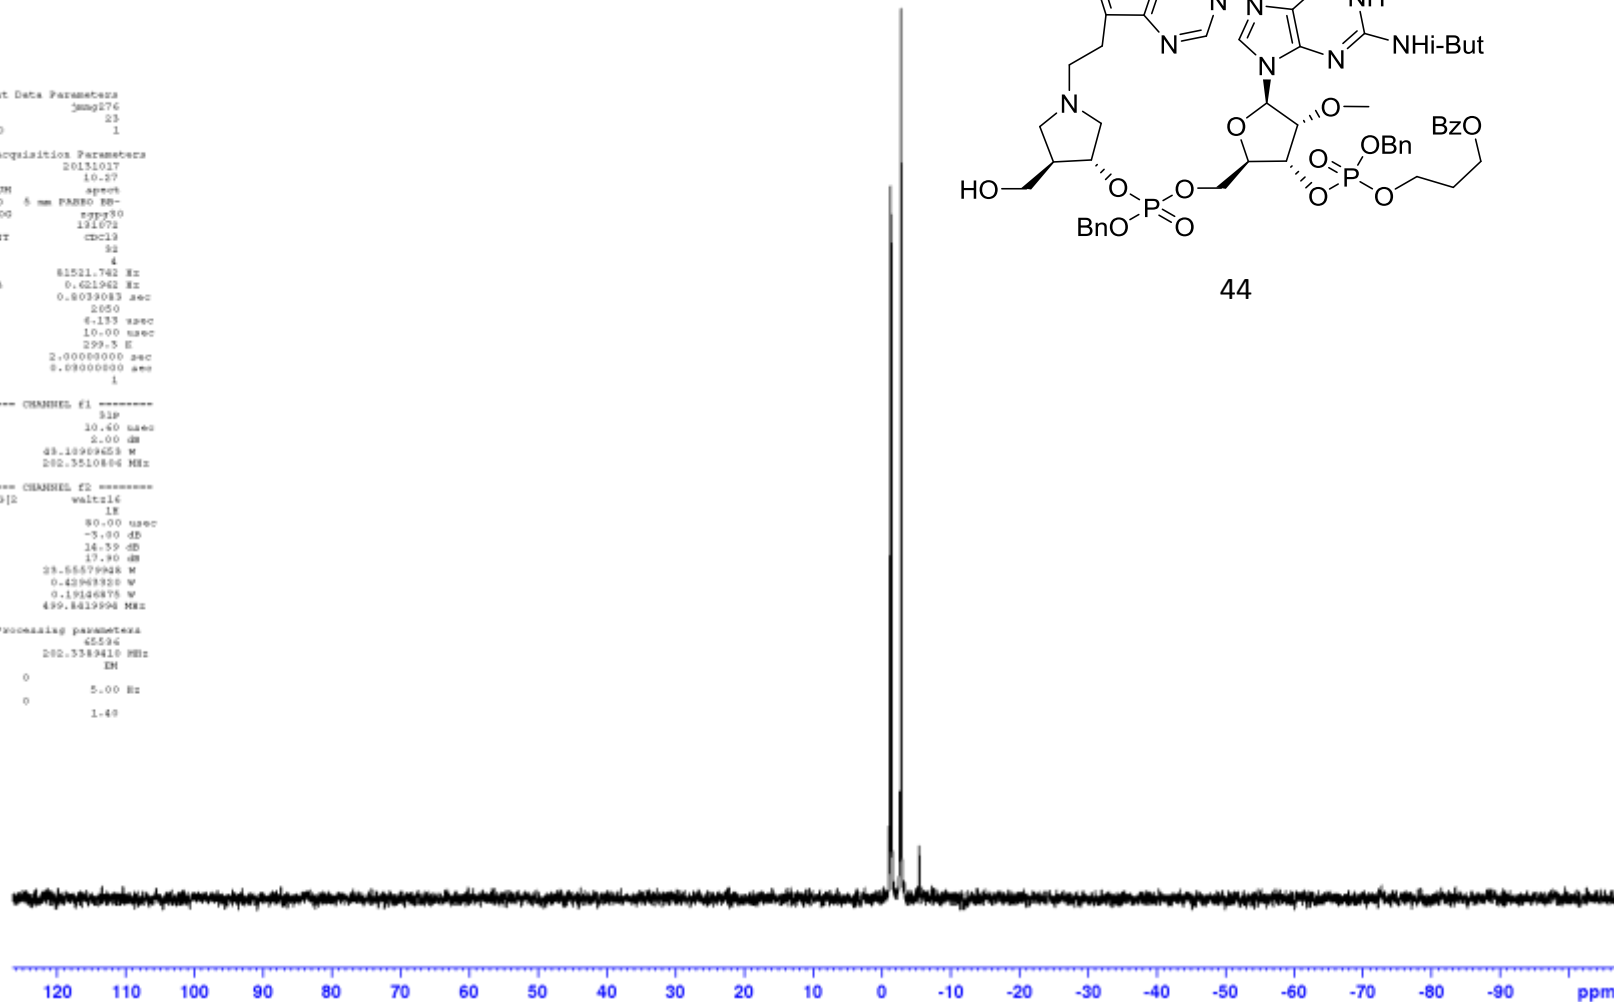

<sup>1</sup>H NMR  
500 MHz

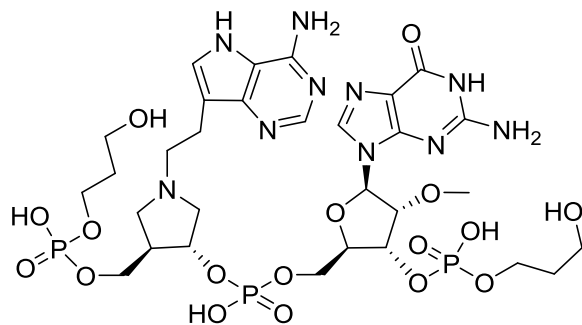

45

Current Data Parameters  
 NAME Jmg289  
 EXPNO 10  
 PROCNO 1  
 F2 - Acquisition Parameters  
 Date\_ 20121102  
 TIME 23:58  
 INSTRUM spect  
 PROBEID 5 mm PABBO BB-  
 PULPROG zgpg30  
 TD 45536  
 SOLVENT H2O  
 NS 32  
 DS 2  
 SWH 10302.198 Hz  
 FIDRES 0.157199 Hz  
 AQ 3.1806805 sec  
 RG 263  
 CW 48.533 usec  
 DE 10.00 usec  
 TE 303.4 K  
 DL 1.0000000 sec  
 TDO 1

----- CHANNEL f1 -----  
 NUCL 1H  
 P1 18.00 usec  
 PL1 -3.00 dB  
 PL1W 23.55579943 M  
 SFO1 499.8420867 MHz

F2 - Processing parameters  
 SI 32768  
 SF 499.8399676 MHz  
 NUC1 1H  
 SFO 499.8399676 MHz  
 LA 0.39 Hz  
 GB 0  
 PC 1.00

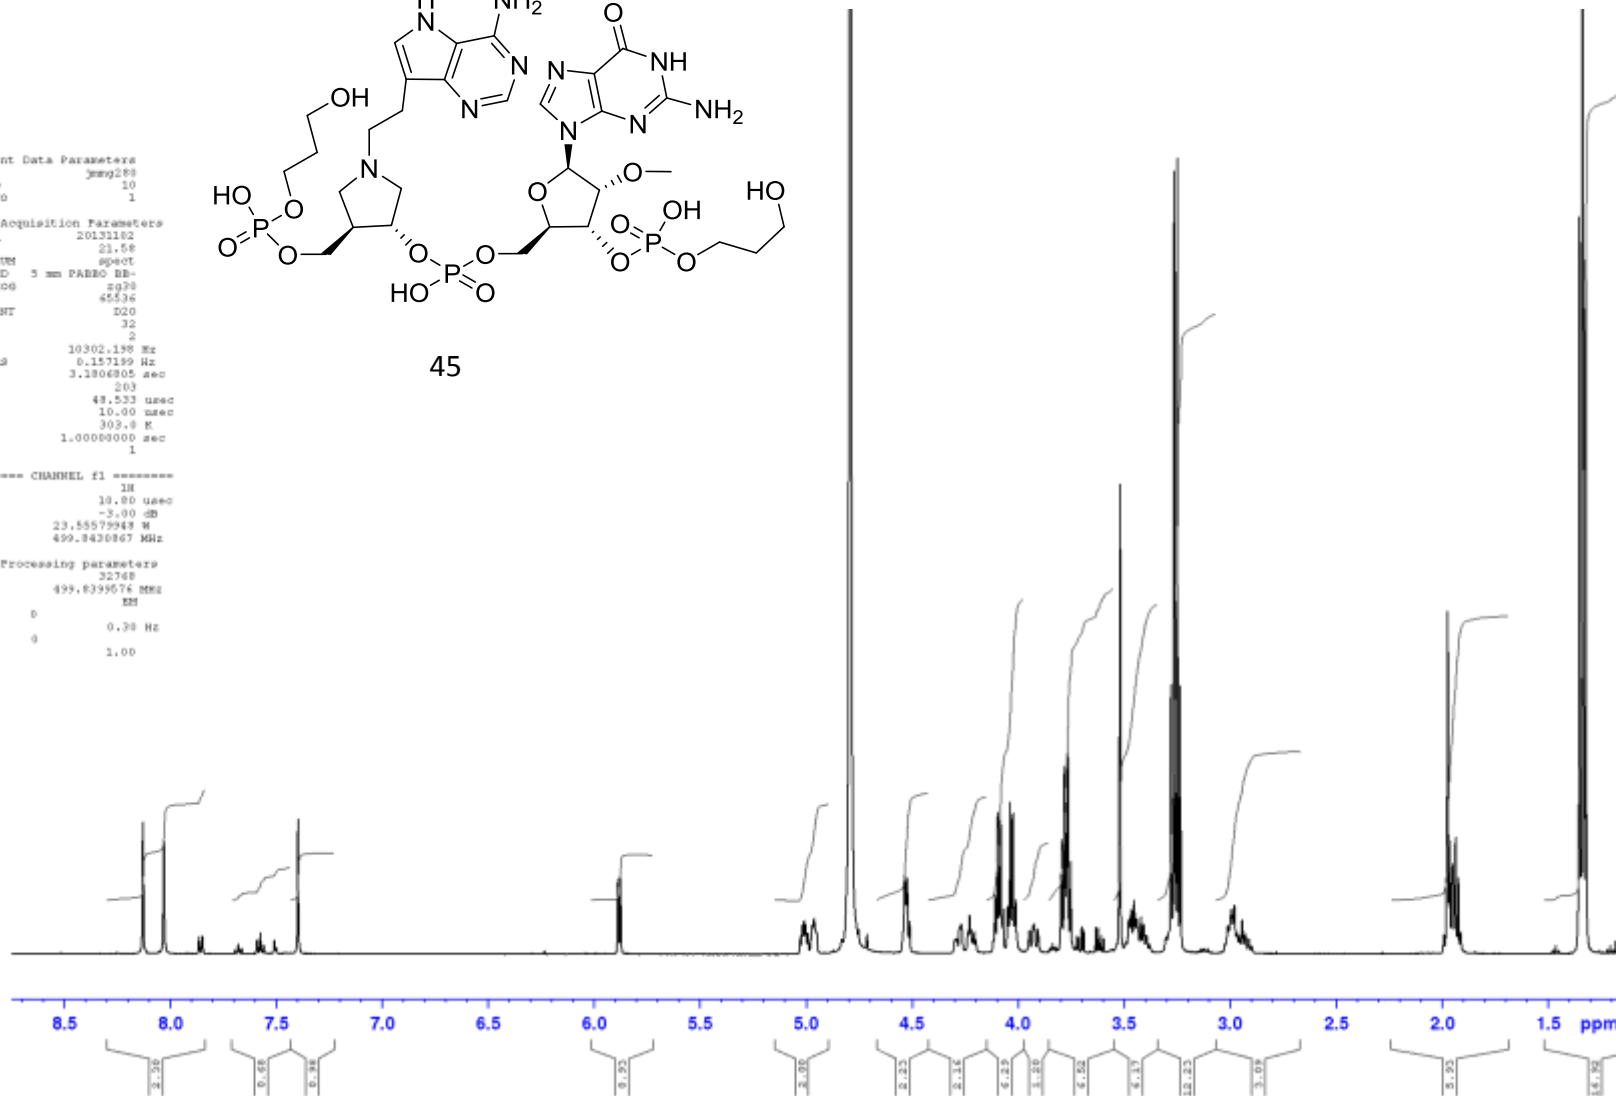

**<sup>13</sup>C NMR  
126 MHz**

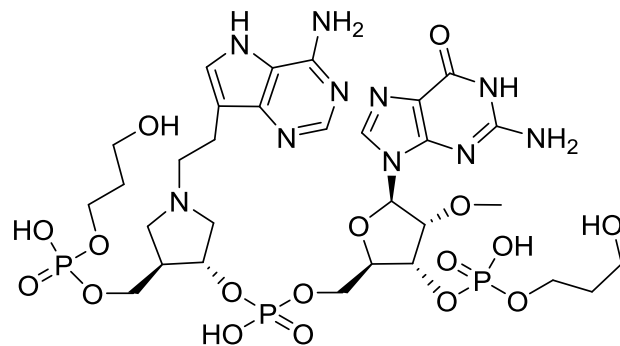

45

```

Current Data Parameters
NAME          3mg230
EXPNO        11
PROCNO       1

F2 - Acquisition Parameters
Date_        20131102
Time         13.54
INSTRUM      spect
PROBHD       5 mm PABBO BB-
PULPROG      zgpg30
TD           65536
SOLVENT      D2O
NS           4192
DS           4
SWH          31250.000 Hz
FIDRES      0.474637 Hz
AQ          1.0485760 sec
RG          2050
DW          18.000 usec
DE          10.00 usec
TE          303.0 K
D3          8.58000000 sec
D11         8.09000000 sec
TEO         1

----- CHANNEL f1 -----
NUC1         13C
P1           11.00 usec
P11          9.00 dB
P11M        31.7049027 W
SFO1        125.0984648 MHz

***** CHANNEL f2 *****
CPOBPRG12   waltz16
NUC2         1H
PCPD2       80.00 usec
P12         -3.00 dB
P112        14.39 dB
P113        17.80 dB
P12M        29.65579928 W
P112M       0.43968320 W
P113M       0.19136875 W
SFO2        499.8419994 MHz

F2 - Processing parameters
SI           32768
SF          125.0984648 MHz
MCM         EM
ASB         0
LB          5.00 Hz
GB         0
PC          1.49
  
```

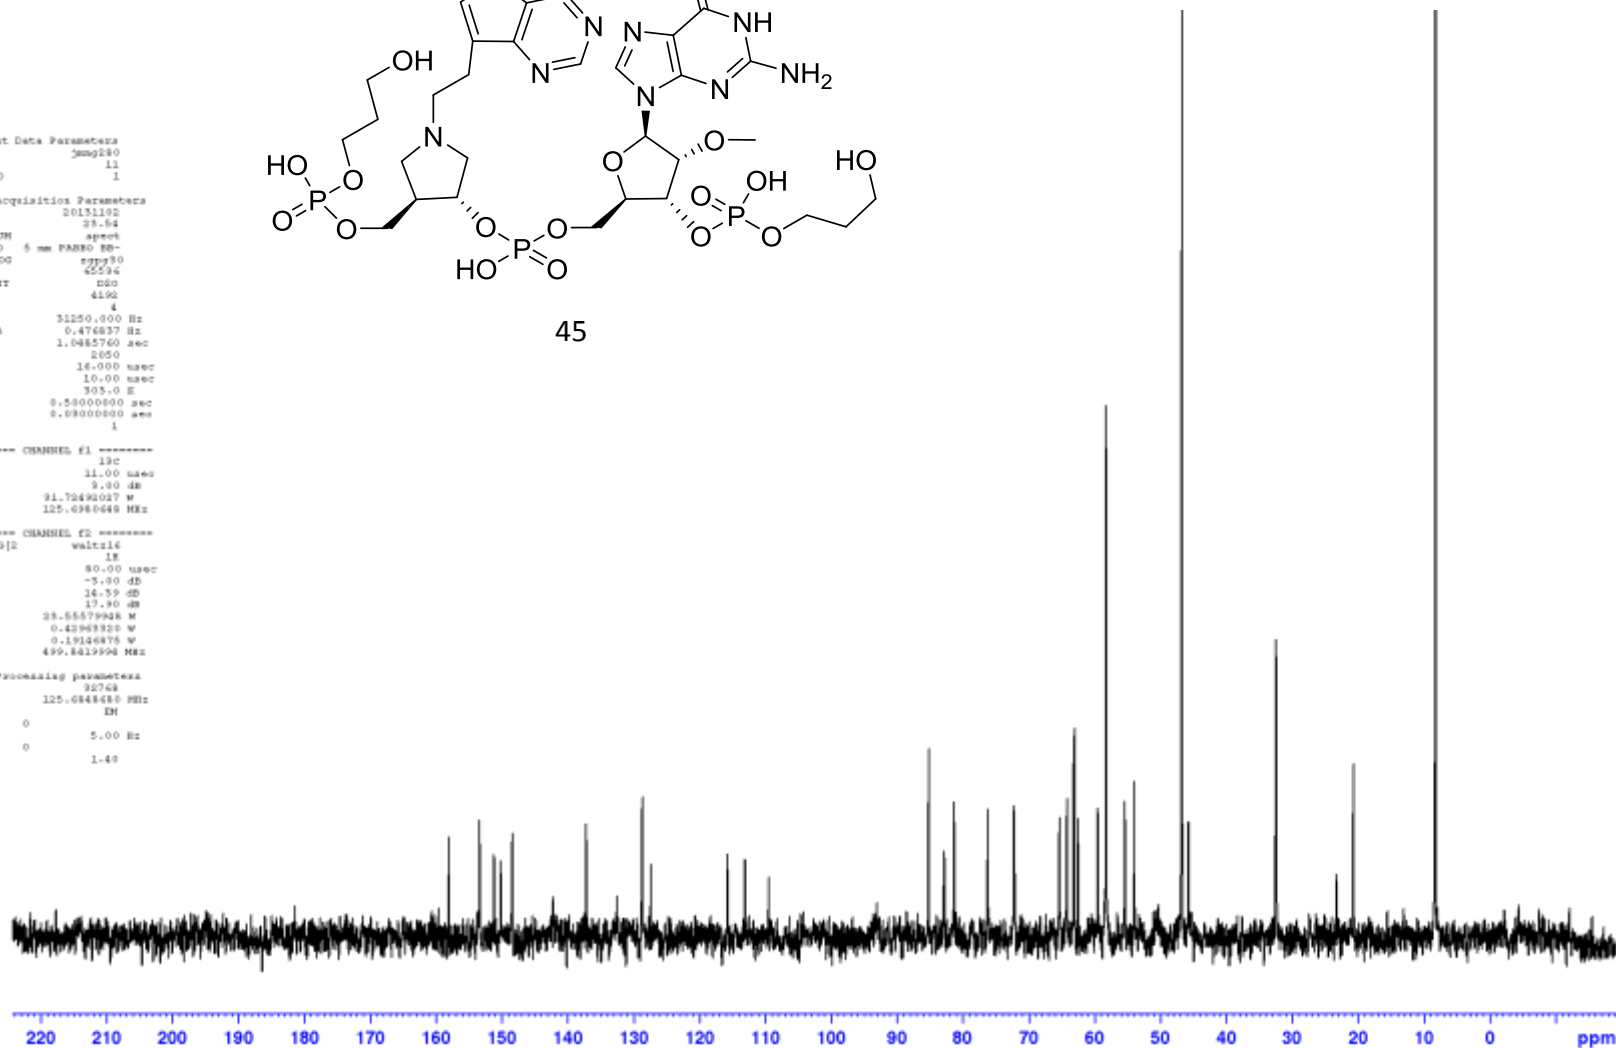

**<sup>31</sup>P NMR  
202 MHz**

```
Current Data Parameters
NAME      Jmgp230
EXPNO    16
PROCNO   1

F2 - Acquisition Parameters
Date_    20131103
Time     9:28
INSTRUM  spect
PROBHD   5 mm PABBO BB-
PULPROG  zgpg30
TD       131072
SOLVENT  D2O
NS       52
DS       4
SWH      61521.742 Hz
FIDRES   0.621962 Hz
AQ       0.8039083 sec
RG       2550
DW       6.133 usec
DE       10.00 usec
TE       303.0 K
D3       2.00000000 sec
D11      0.09000000 sec
TEO      1
```

```
----- CHANNEL f1 -----
NUC1     31P
P1       10.40 usec
P11      5.00 dB
P11M     48.18969458 W
SFO1     202.3510846 MHz
```

```
----- CHANNEL f2 -----
CPDPRG2  waltz16
NUC2     1H
PCPD2    80.00 usec
P2       -3.00 dB
P21      14.39 dB
P21M     17.90 dB
P21M     28.65579948 W
P11M     0.43968320 W
P11M     0.19136875 W
SFO2     499.8419894 MHz
```

```
F2 - Processing parameters
SI       65536
SF       202.3389410 MHz
MCW      IM
SAB      0
LB       5.00 Hz
GB       0
PC       1.49
```

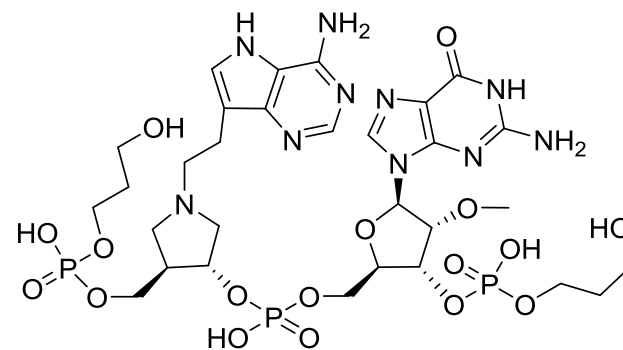

45

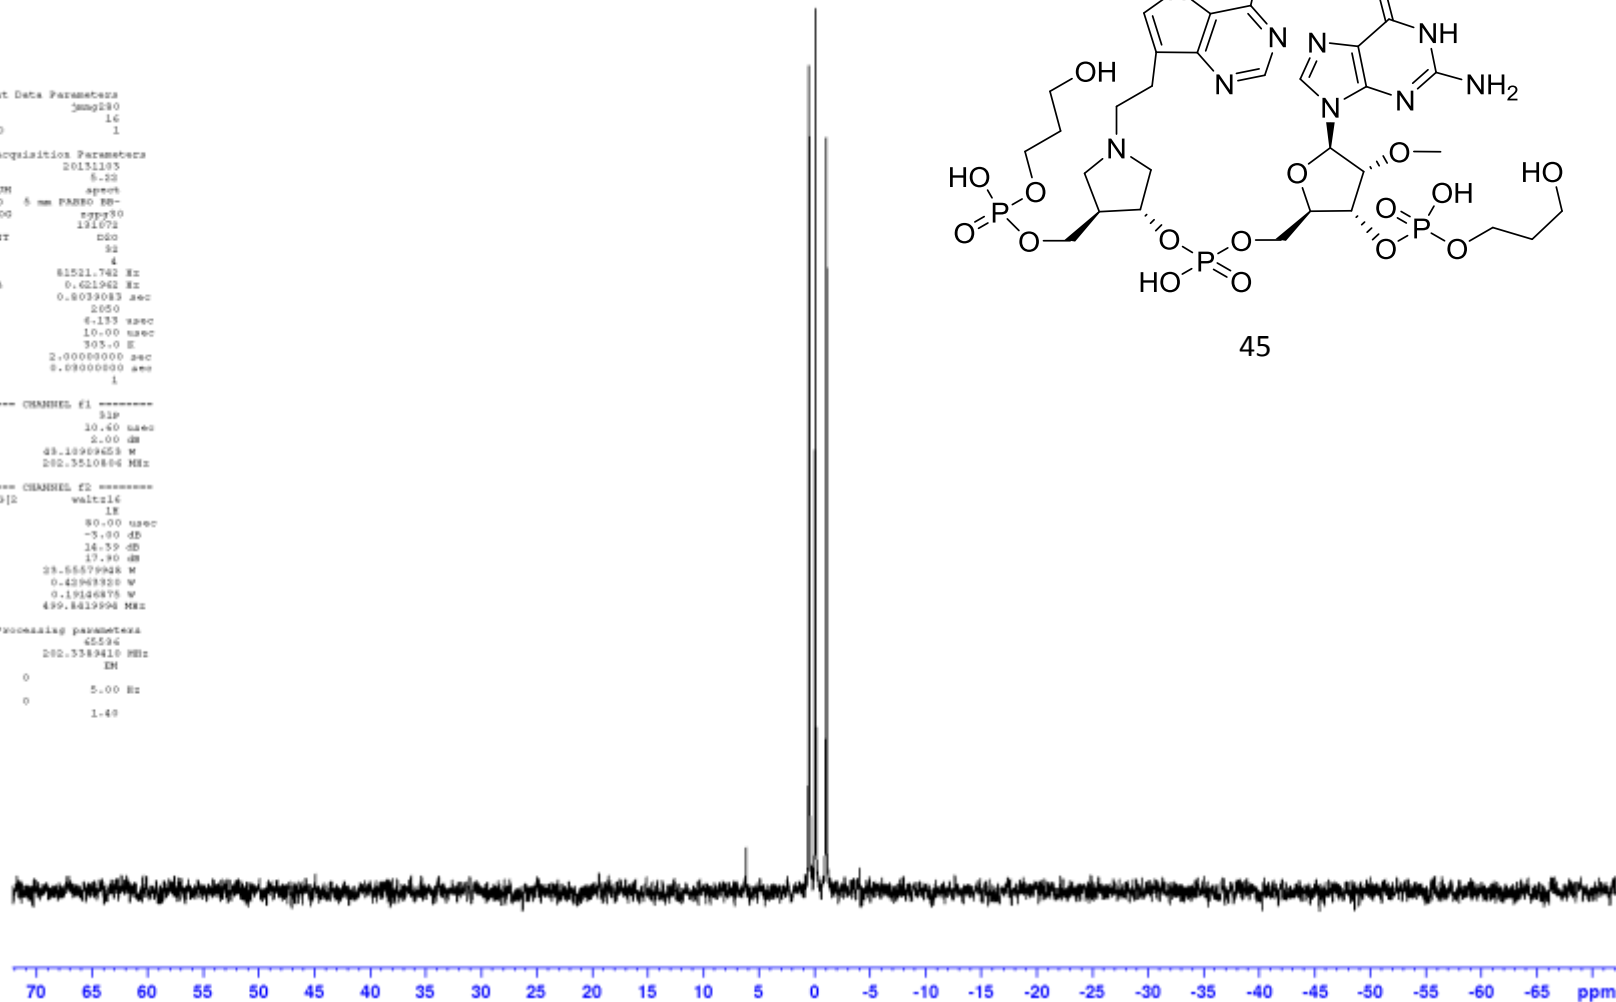



# HPLC

Data File D:\DATA\NOV042013\20131104A 2013-11-04 11-14-04\JMMG280NMR.D

Sample Name: jmmg280

```

=====
Acq. Operator   : SYSTEM                      Seq. Line :    6
Acq. Instrument : LCMS                       Location  : Vial 63
Injection Date  : 11/4/2013 12:47:30 PM      Inj       :    1
                                           Inj Volume: 1.000 µl

Acq. Method    : D:\DATA\NOV042013\20131104A 2013-11-04 11-14-04\P1 T9 AW BM FA 5-50M G5H1 .
                                           9-20.M
Last changed   : 11/4/2013 12:21:02 PM by SYSTEM
Analysis Method : D:\DATA\NOV042013\20131104A 2013-11-04 11-14-04\P1 T9 AW BM FA 5-50M G5H1 .
                                           9-20.M (Sequence Method)
Last changed   : 11/4/2013 3:02:32 PM by SYSTEM
                                           (modified after loading)
Method Info    : Position 1; Poroshell 120 EC-C18 3x50mm 2.7µm; A:Water+0.1FA, B:MeOH; T0-
                                           5min 5-50%B; T5-6 min 50%B; Flow 0.5 mL/min; m/z 100-1000
    
```

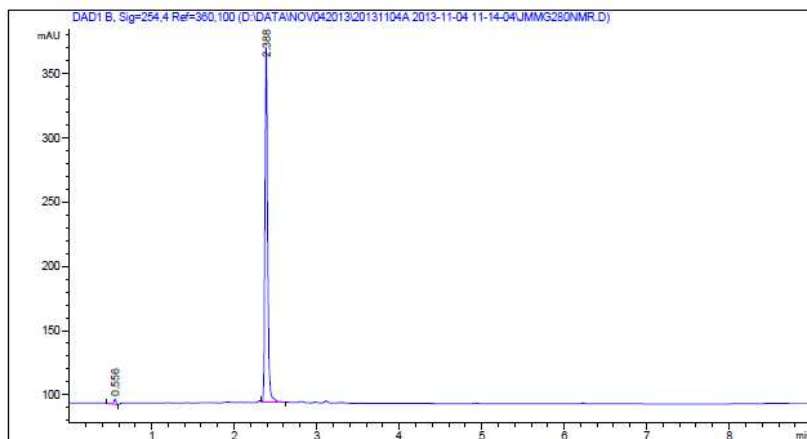

## Area Percent Report

```

Sorted By      : Signal
Multiplier     : 1.0000
Dilution       : 1.0000
Do not use Multiplier & Dilution Factor with ISTDs
    
```

Signal 1: DAD1 B, Sig=254,4 Ref=360,100

| Peak # | RetTime [min] | Type | Width [min] | Area [mAU*s] | Height [mAU] | Area %  |
|--------|---------------|------|-------------|--------------|--------------|---------|
| 1      | 0.556         | BB   | 0.0335      | 9.48480      | 4.16989      | 1.4873  |
| 2      | 2.388         | VV   | 0.0344      | 628.25488    | 277.15335    | 98.5127 |

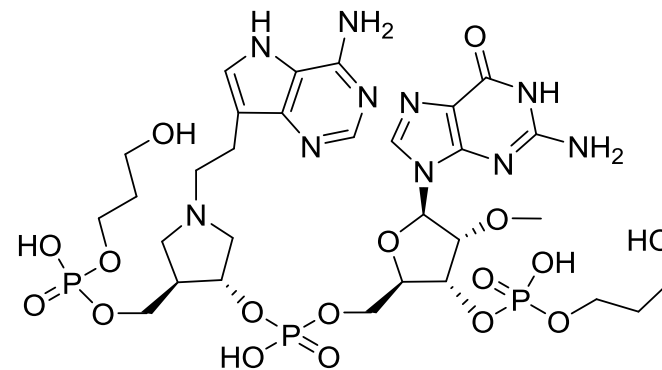

45

<sup>1</sup>H NMR  
500 MHz

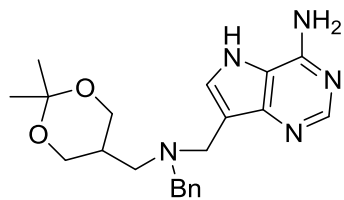

47

Current Data Parameters  
NAME gbel1-1344  
EXPNO 10  
PROCNO 1

F2 - Acquisition Parameters  
Date\_ 20111023  
Time 13.32  
INSTRUM spect  
PROBHD 5 mm PABBO BB-  
PULPROG zg30  
TD 45536  
SOLVENT MeOD  
NS 32  
DS 2  
SWH 10336.578 Hz  
FIDRES 0.157632 Hz  
AQ 3.1719425 sec  
RG 301  
DM 43.408 usec  
DE 6.50 usec  
TE 303.2 K  
DL 1.0000000 sec  
TDO 1

===== CHANNEL f1 =====  
NUC1 1H  
P1 11.20 usec  
P11 1.00 dB  
PL1W 18.35641289 Hz  
SFO1 500.0539880 MHz

F2 - Processing parameters  
SI 32768  
SF 500.0500125 MHz  
WDW EM  
SSB 0  
LB 0.39 Hz  
GB 0  
FC 1.00

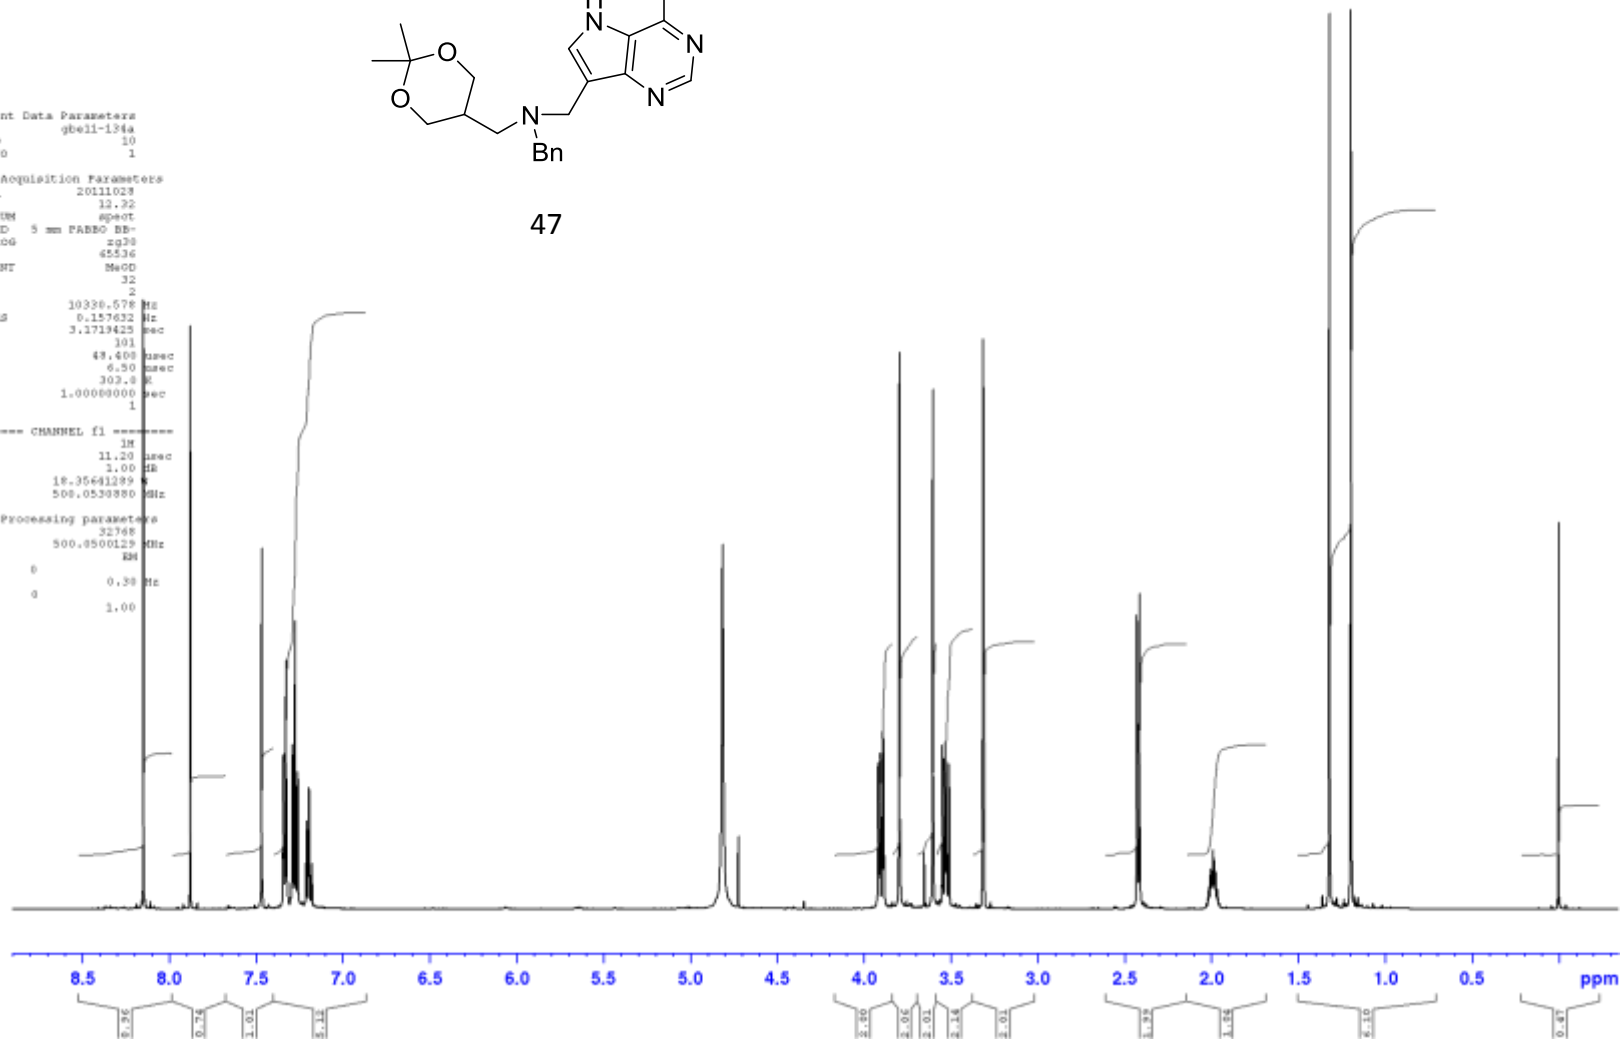

<sup>13</sup>C NMR  
126 MHz

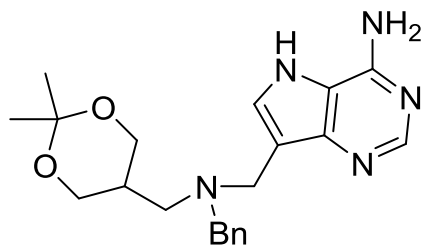

47

```
Current Data Parameters
NAME          sb11-134a
EXPNO         34
PROCNO        1

F2 - Acquisition Parameters
Date_         20111024
Time          19:27
INSTRUM       spect
PROBHD        5 mm PABBO BB-
PULPROG       zgpg30
TD            65536
SOLVENT       MeOD
NS            800
DS            4
SWH           31250.000 Hz
FIDRES        0.476837 Hz
AQ            1.0485760 sec
RG            112
DW            16.000 usec
DE            15.08 usec
TE            305.0 K
D3            0.59000000 sec
D11           0.09000000 sec
TEO           1
```

```
----- CHANNEL F1 -----
NUC1          13C
P1            9.00 usec
PL1           -1.00 dB
P1LW         123.9428884 W
SFO1          125.7508755 MHz
```

```
----- CHANNEL F2 -----
CPOBPRG2     waltz16
NUC2          1H
PCPD2        80.00 usec
P12           1.00 dB
P1L2         19.98 dB
P1L3         21.10 dB
P13W         18.95441289 W
P1L3W        0.35967363 W
P1L3W        0.17983683 W
SFO2          500.0520002 MHz
```

```
F2 - Processing parameters
SI            32768
SF            125.7374945 MHz
MCW           IM
ASB           0
LB            3.00 Hz
GB            0
PC            1.43
```

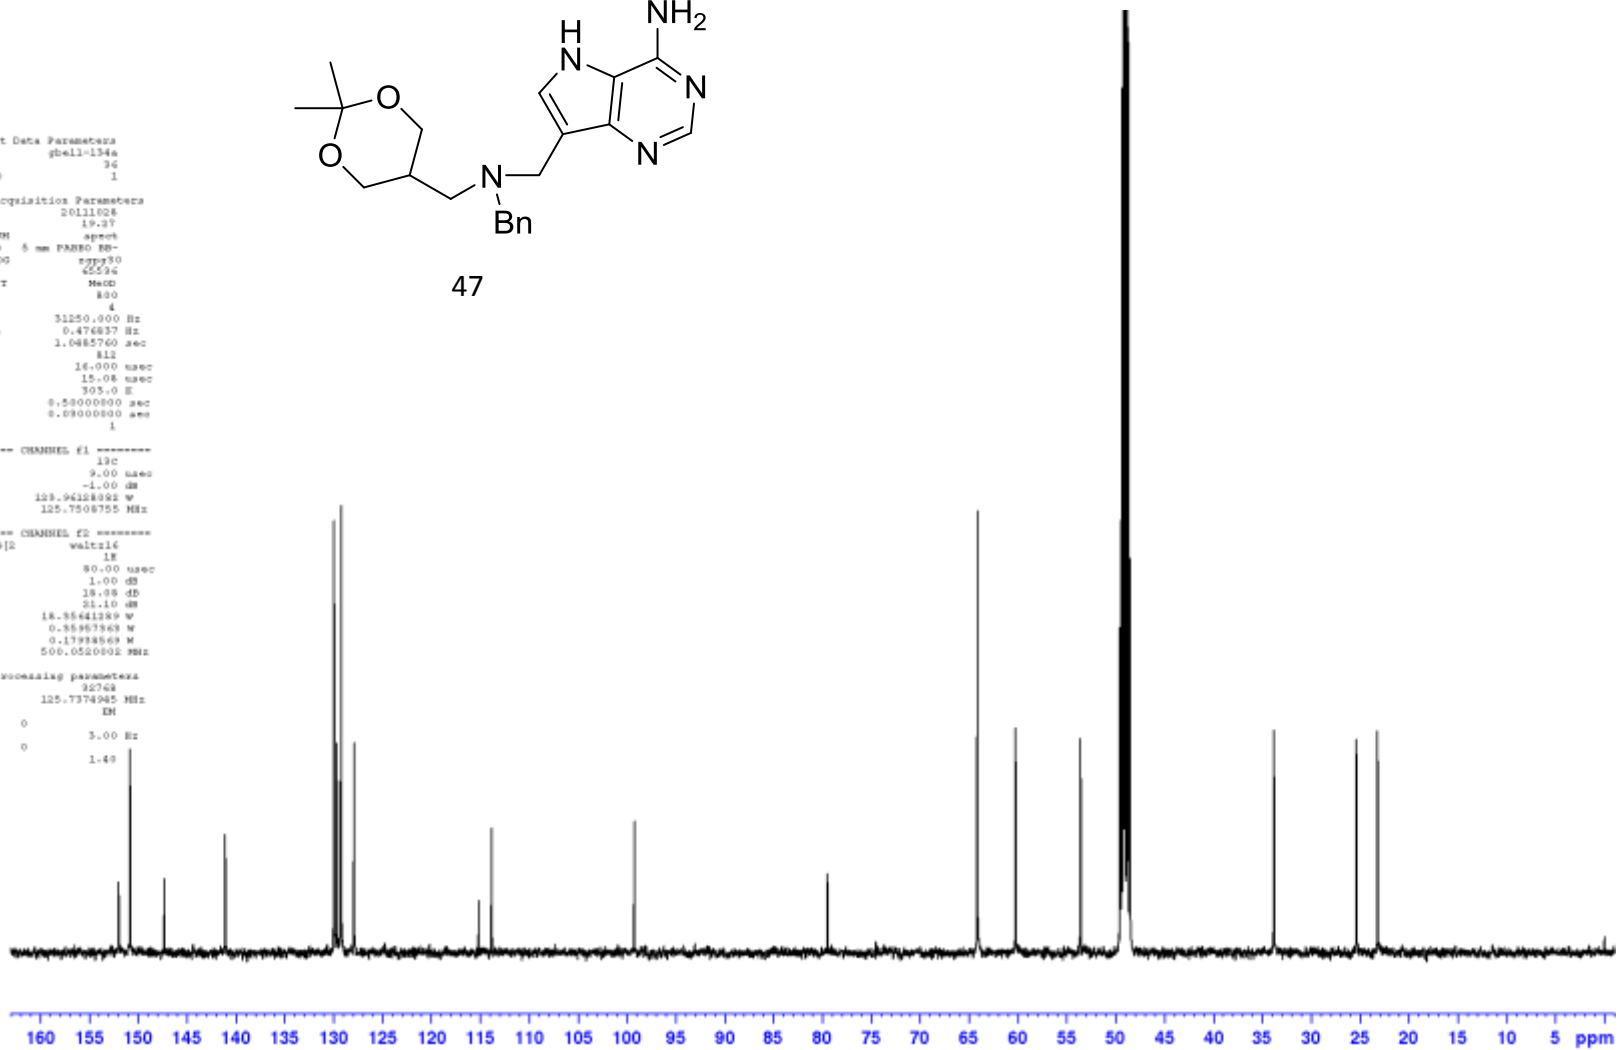

<sup>1</sup>H NMR  
500 MHz

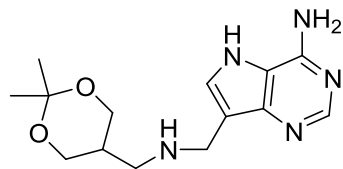

48

Current Data Parameters  
NAME gbell137a  
EXPNO 10  
PROCNO 1

F2 - Acquisition Parameters  
Date\_ 20111102  
Time 17.10  
INSTRUM spect  
PROBHD 5 mm PABBO B2-  
PULPROG zgpg  
TD 65536  
SOLVENT MeOD  
NS 32  
DS 2  
SWH 10338.578 Hz  
FIDRES 0.157632 Hz  
AQ 3.1719425 sec  
RG 314  
CW 43.480 usec  
DE 6.50 usec  
TE 303.0 K  
D1 1.0000000 sec  
YD0 1

----- CHANNEL f1 -----  
NUC1 1H  
P1 11.20 usec  
P11 1.00 dB  
PL1N 18.35641289 M  
SFO1 500.0530880 MHz

F2 - Processing parameters  
SI 32768  
SF 500.0500146 MHz  
NUC 1H  
SSB 0  
LB 0.30 Hz  
GB 0  
PC 1.00

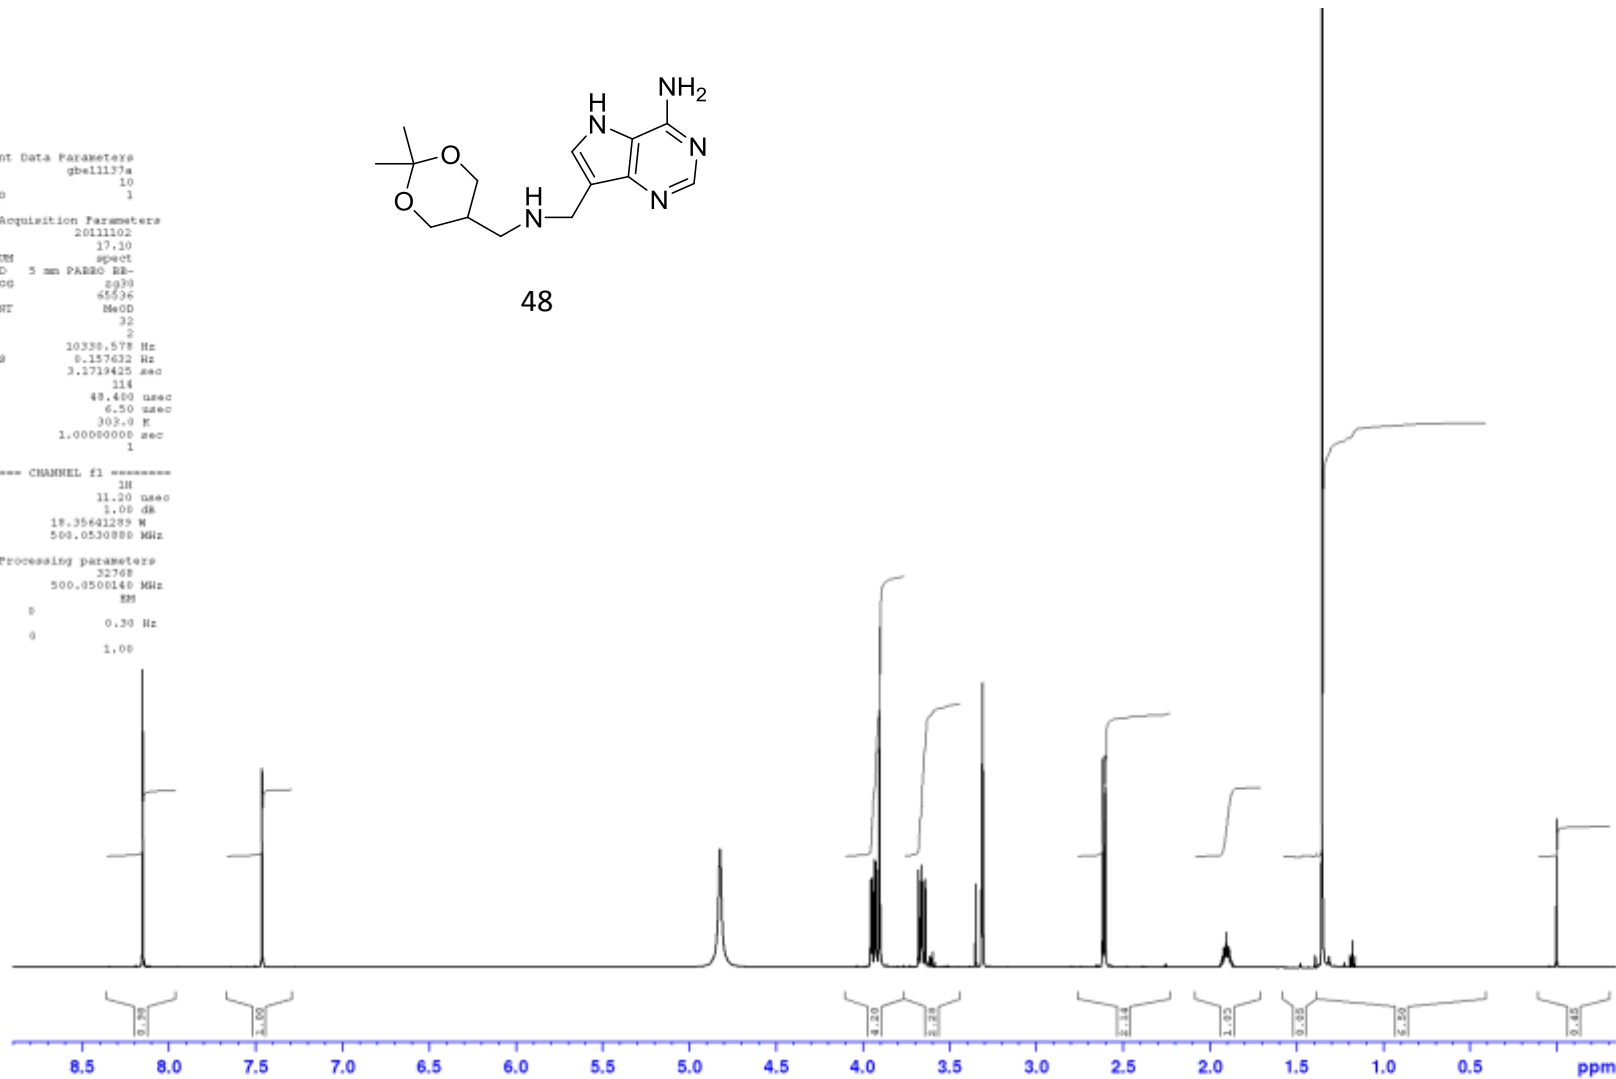

<sup>13</sup>C NMR  
126 MHz

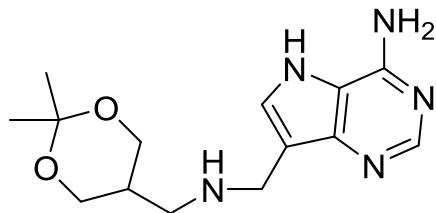

48

```
Current Data Parameters
NAME      gb111137a
EXPNO    21
PROCNO   1

F2 - Acquisition Parameters
Date_    20111102
Time     18.09
INSTRUM  spect
PROBHD   5 mm PABBO BB-
PULPROG  zgpg30
TD       65536
SOLVENT  MeOD
NS       2400
DS       4
SWH      31250.000 Hz
FIDRES   0.476837 Hz
AQ       1.0485760 sec
RG       512
DM       16.000 usec
DE       15.08 usec
TE       305.0 K
D3       0.58000000 sec
D11      0.09000000 sec
TEO      1

----- CHANNEL f1 -----
NUC1     13C
P1       9.00 usec
PL1      -1.00 dB
P1LM     123.9428284 W
SFO1     125.7508755 MHz

***** CHANNEL f2 *****
CPOPRG2  waltz16
NUC2     1H
PCPD2    80.00 usec
P2       1.00 dB
P2L2     19.98 dB
P2L3     21.10 dB
P2LM     18.95441289 W
P2L3M    0.35967363 W
P2L3W    0.17983669 W
SFO2     500.0520002 MHz

F2 - Processing parameters
SI       32768
SF       125.7374945 MHz
MCW      IM
SAB      0
LB       3.00 Hz
GB       0
PC       1.49
```

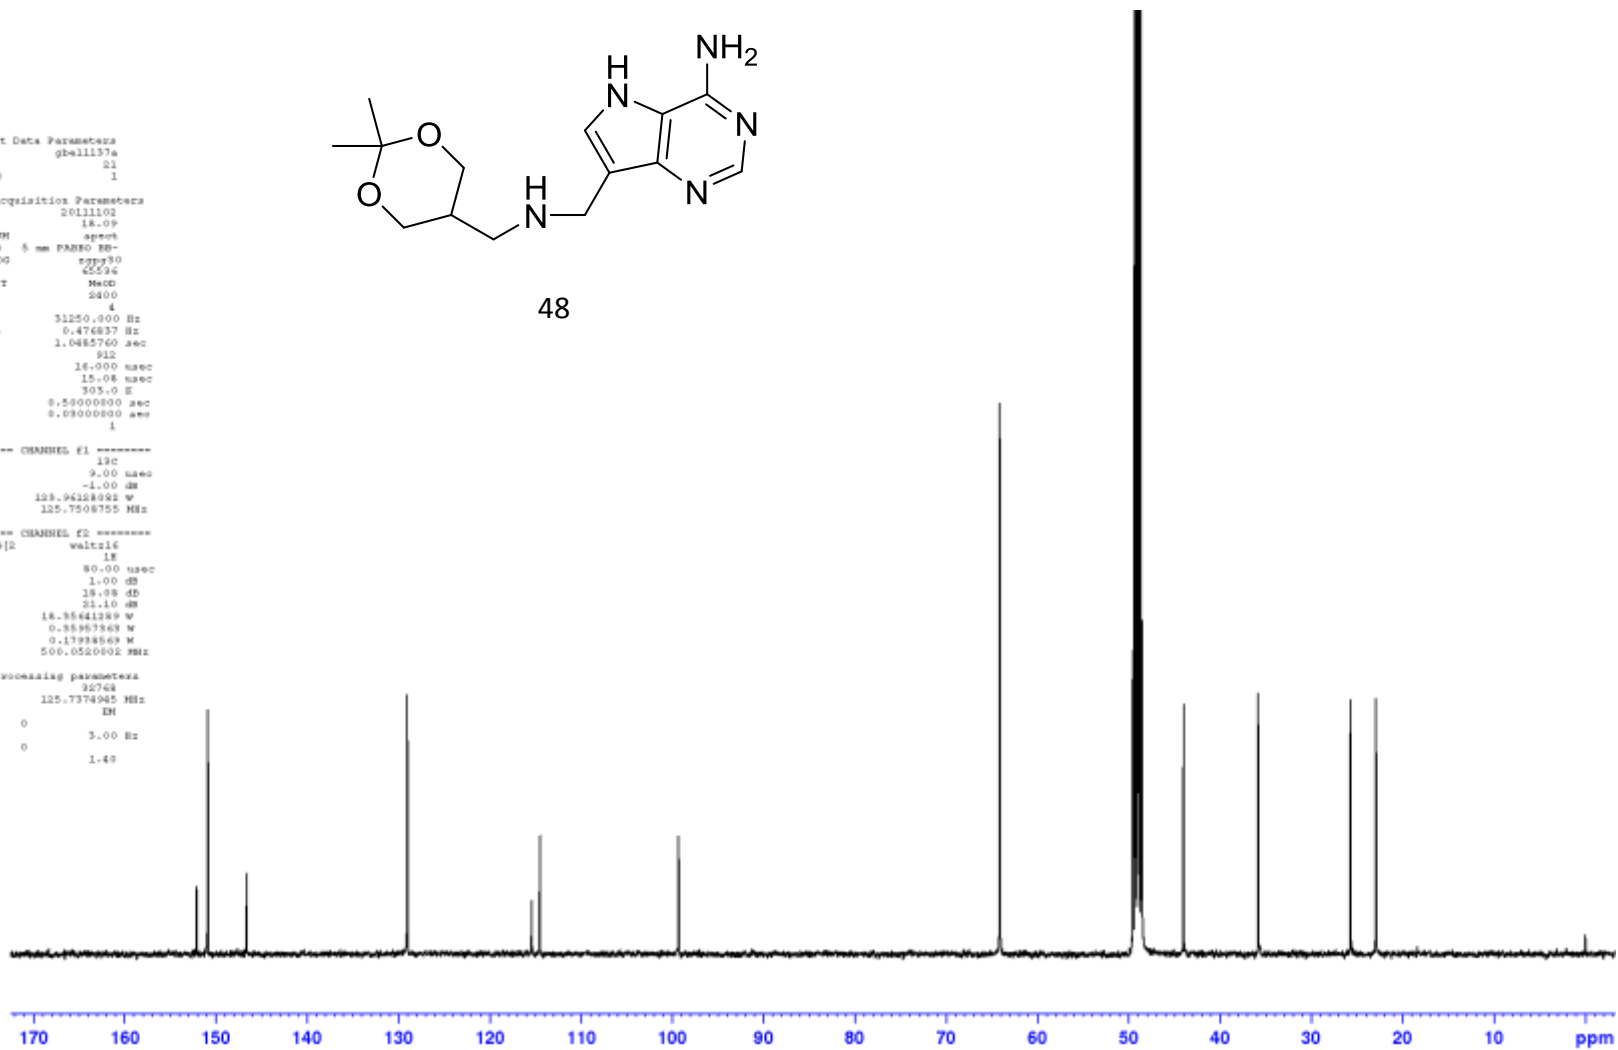

<sup>1</sup>H NMR  
500 MHz

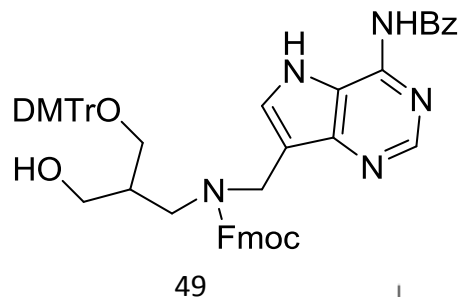

Current Data Parameters  
NAME gbel3084a  
EXPNO 10  
PROCNO 1

F2 - Acquisition Parameters  
Date\_ 20131010  
Time 17.54  
INSTRUM spect  
PROBHD 5 mm PABBO BB-  
PULPROG zg30  
TD 65536  
SOLVENT CDCl3  
NS 32  
DS 2  
SWH 10338.578 Hz  
FIDRES 0.157632 Hz  
AQ 3.1719425 sec  
RG 50.3  
DN 49.400 usec  
DE 6.50 usec  
TE 303.2 K  
D1 1.0000000 sec  
TD0 1

===== CHANNEL f1 =====  
NUC1 1H  
P1 11.20 usec  
PL1 1.08 dB  
PL1N 18.35641289 M  
RFOL 500.0530886 MHz

F2 - Processing parameters  
SI 32768  
SF 500.050043 MHz  
NUC NH  
SSB 0  
LB 0.30 Hz  
GB 0  
PC 1.08

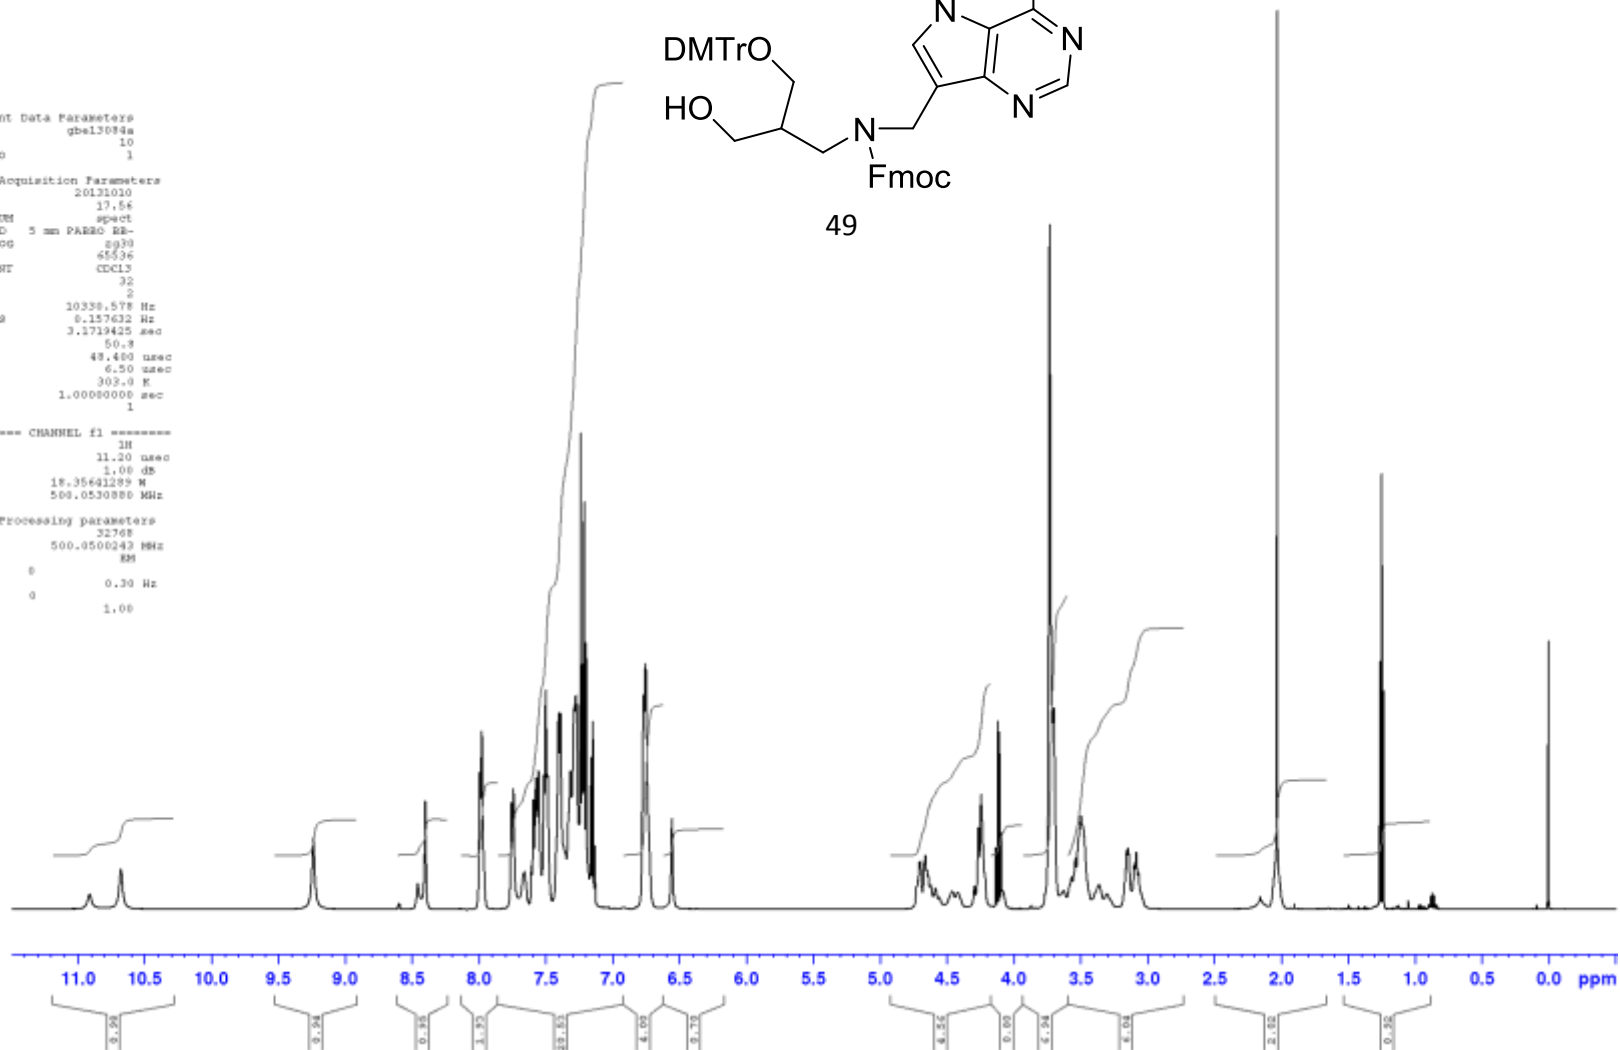

<sup>13</sup>C NMR  
126 MHz

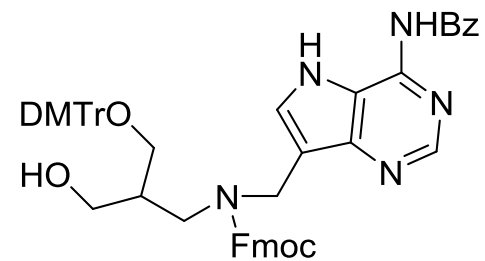

49

```
Current Data Parameters
NAME      gbel3084a
EXPNO     11
PROCNO    1

F2 - Acquisition Parameters
Date_     20131010
Time      19.08
INSTRUM   spect
PROBHD    5 mm PABBO BB-
PULPROG   zgpg30
TD        65536
SOLVENT   cpd13
NS        2400
DS        4
SFO       125.000000 MHz
FIDRES    0.476837 Hz
AQ        1.0485760 sec
RG        2050
DM        18.000 usec
DE        15.08 usec
TE        303.0 K
D3        0.58000000 sec
D11       0.09000000 sec
TEO       1

----- CHANNEL f1 -----
NUC1      13C
P1        9.00 usec
P11       -1.00 dB
P11W     123.9428884 W
SFO1      125.7508755 MHz

----- CHANNEL f2 -----
CPDPRG2   waltz16
NUC2      1H
PCPD2     80.00 usec
P12       1.00 dB
P12W     19.38 dB
P13       21.10 dB
P13W     18.95441289 W
P13M     0.35867363 W
P13W     0.17984569 W
SFO2      500.0520002 MHz

F2 - Processing parameters
SI        32768
SF        125.7376730 MHz
MCM       EM
SAB       0
LB        3.00 Hz
GB        0
PC        1.49
```

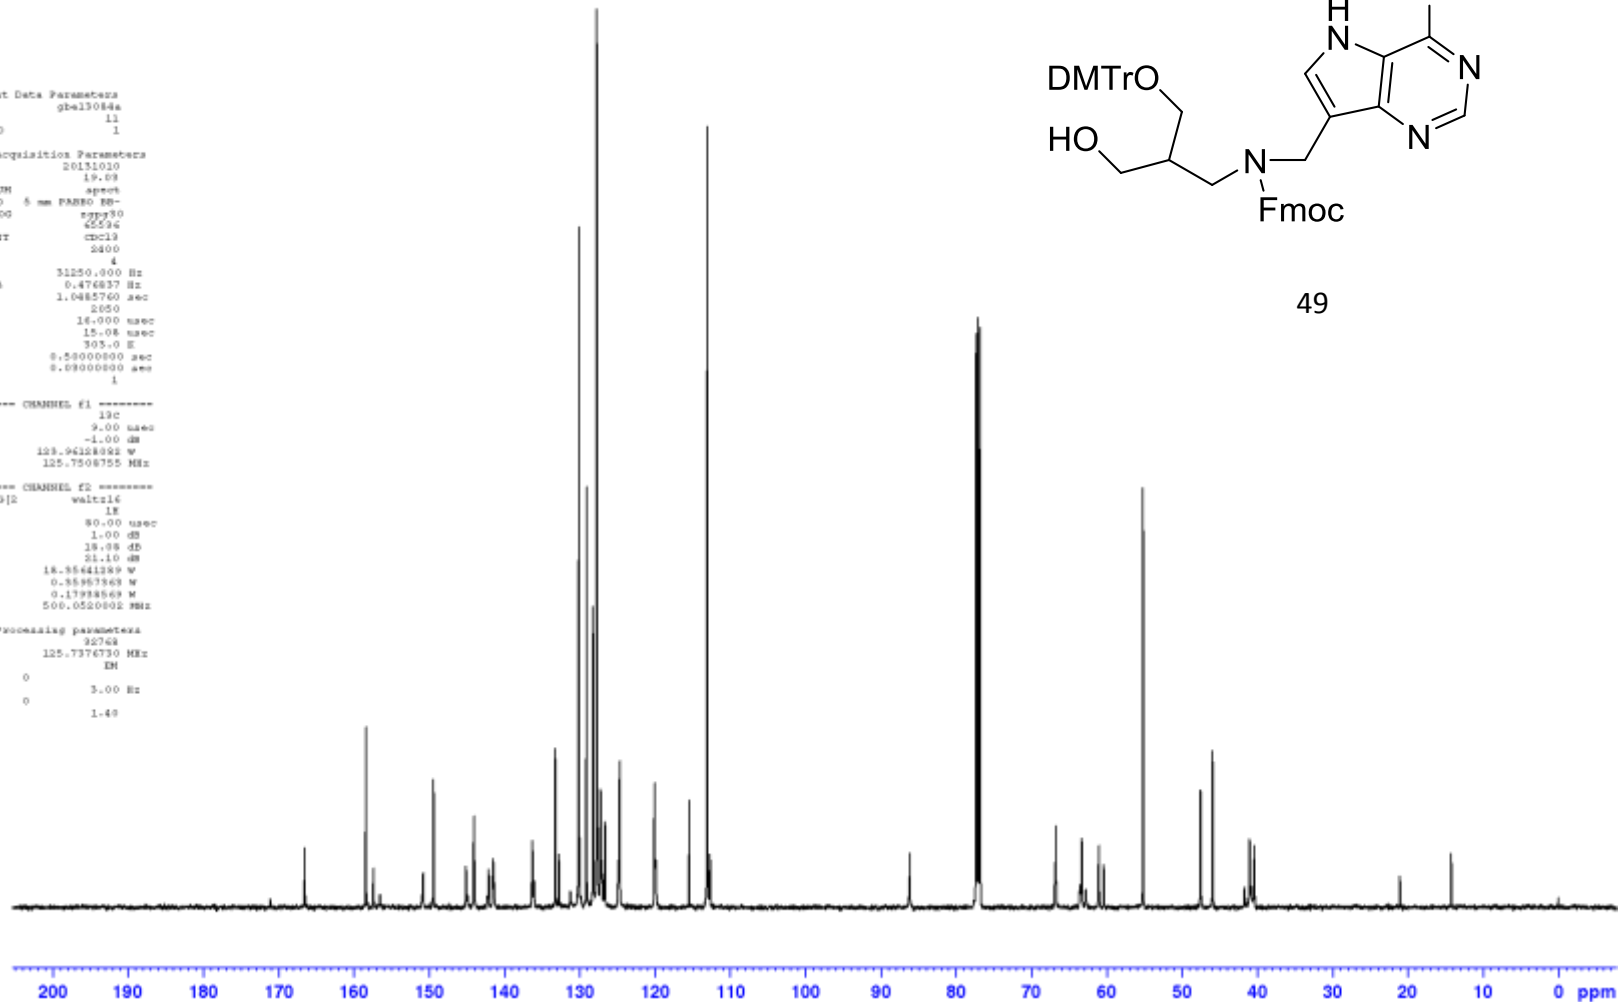

**<sup>31</sup>P NMR  
202 MHz**

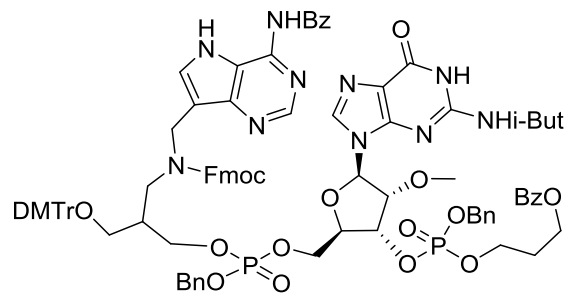

50

```

Current Data Parameters
NAME          3m0122
EXPNO         10
PROCNO        1

F2 - Acquisition Parameters
Date_         20120924
Time         15:51
INSTRUM       spect
PROBHD        5 mm PABBO BB-
PULPROG       zgpg30
TD            131072
SOLVENT       CDCl3
NS            32
DS            4
SWH           81521.742 Hz
FIDRES       0.621962 Hz
AQ           0.8035083 sec
RG           2056
DW           6.123 usec
DE           6.50 usec
TE           300.2 K
D1           3.0000000 sec
d11          0.02000000 sec
TE0          1

----- CHANNEL f1 -----
NUC1          31P
P1           18.40 usec
PL1          -1.00 dB
P1M          55.50078523 W
SFO1         202.4340954 MHz

----- CHANNEL f2 -----
CHOPPRP[2]   multiC
NUC2          1H
PCPD2        80.00 usec
P12          1.00 dB
P1L2         19.08 dB
P1L3         21.10 dB
P1M2         18.35641289 W
P1L2M        0.35907363 W
P1L3M        0.17348569 W
SFO2         500.0520082 MHz

F2 - Processing parameters
SI           65536
SF           202.4239500 MHz
NCM          324
ZSN          0
LB           3.00 Hz
GB           0
PC           1.40

```

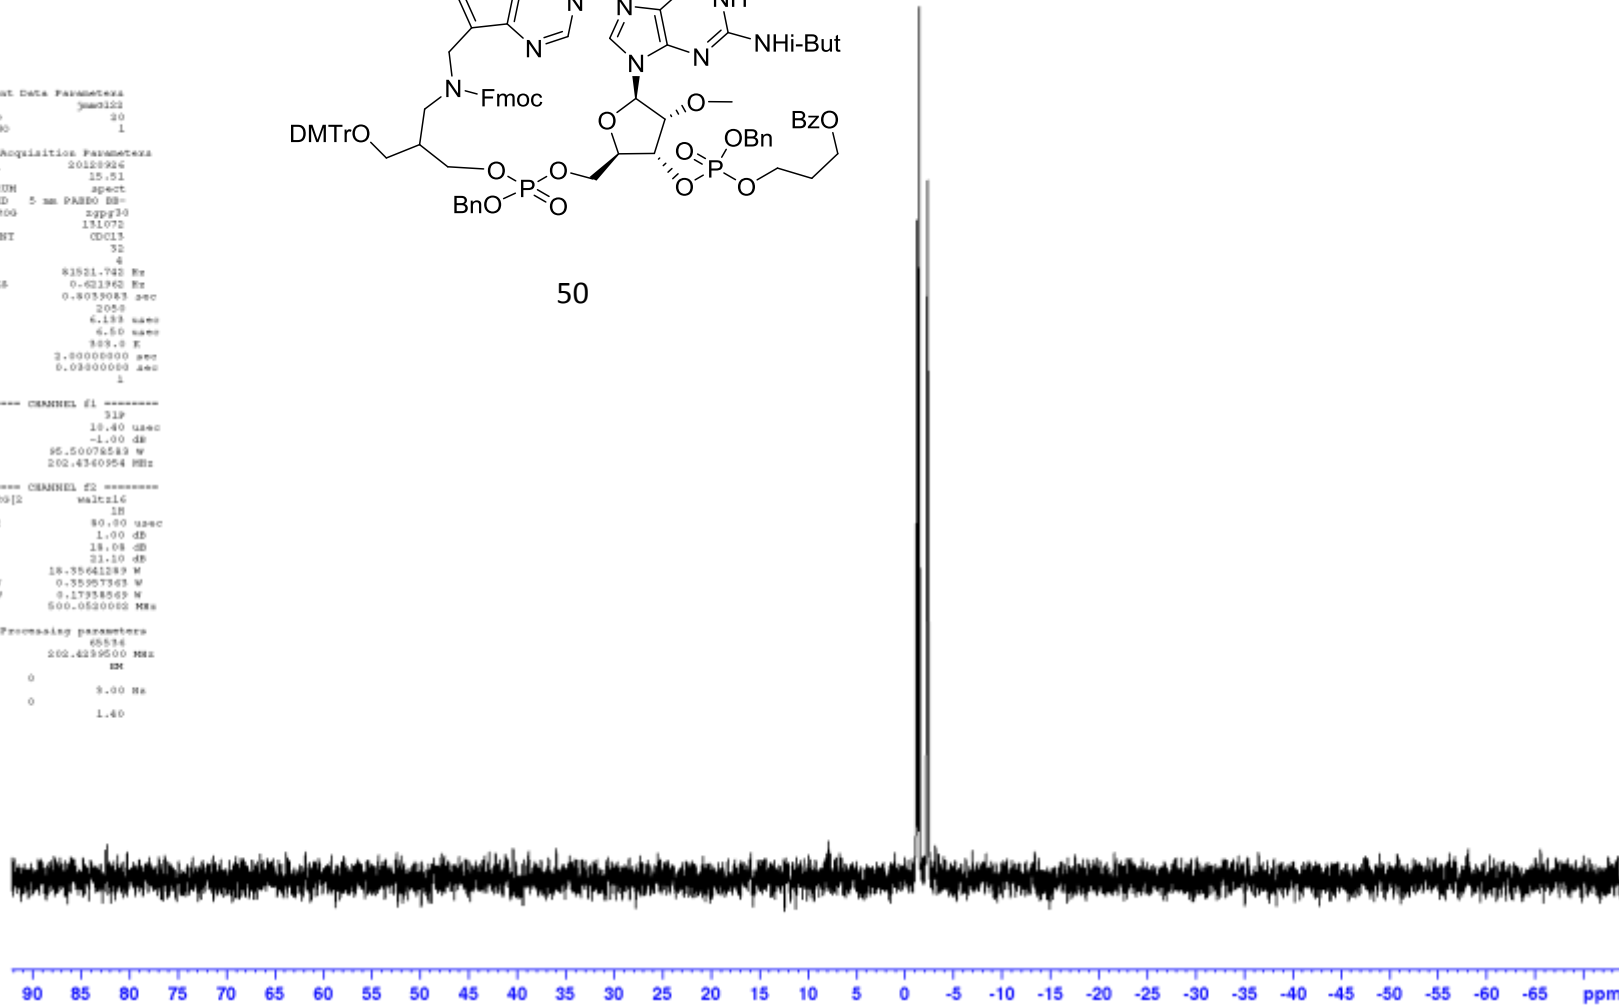



<sup>1</sup>H NMR  
500 MHz

Current Data Parameters  
NAME jmg123  
EXPNO 10  
PROCNO 1

F2 - Acquisition Parameters  
Date\_ 20120927  
Time 11:02  
INSTRUM spect  
PROBHD 5 mm PABBO BB-  
PULPROG zgpg30  
TD 65536  
SOLVENT ccd13  
NS 32  
DS 2  
SWH 10330.578 Hz  
FIDRES 0.157632 Hz  
AQ 3.1719425 sec  
RG 203  
CW 49.409 usec  
DE 6.50 usec  
TE 303.2 K  
D1 1.0000000 sec  
TDO 1

----- CHANNEL f1 -----  
NUC1 1H  
P1 11.20 usec  
PL1 1.00 dB  
PL1W 18.35641289 W  
RFOL 500.0530880 MHz

F2 - Processing parameters  
SI 32768  
SF 500.0500176 MHz  
NMQ 0  
SSB 0  
LA 0.39 Hz  
GB 0  
PC 1.00

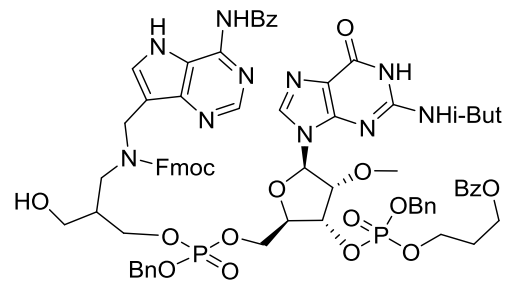

51

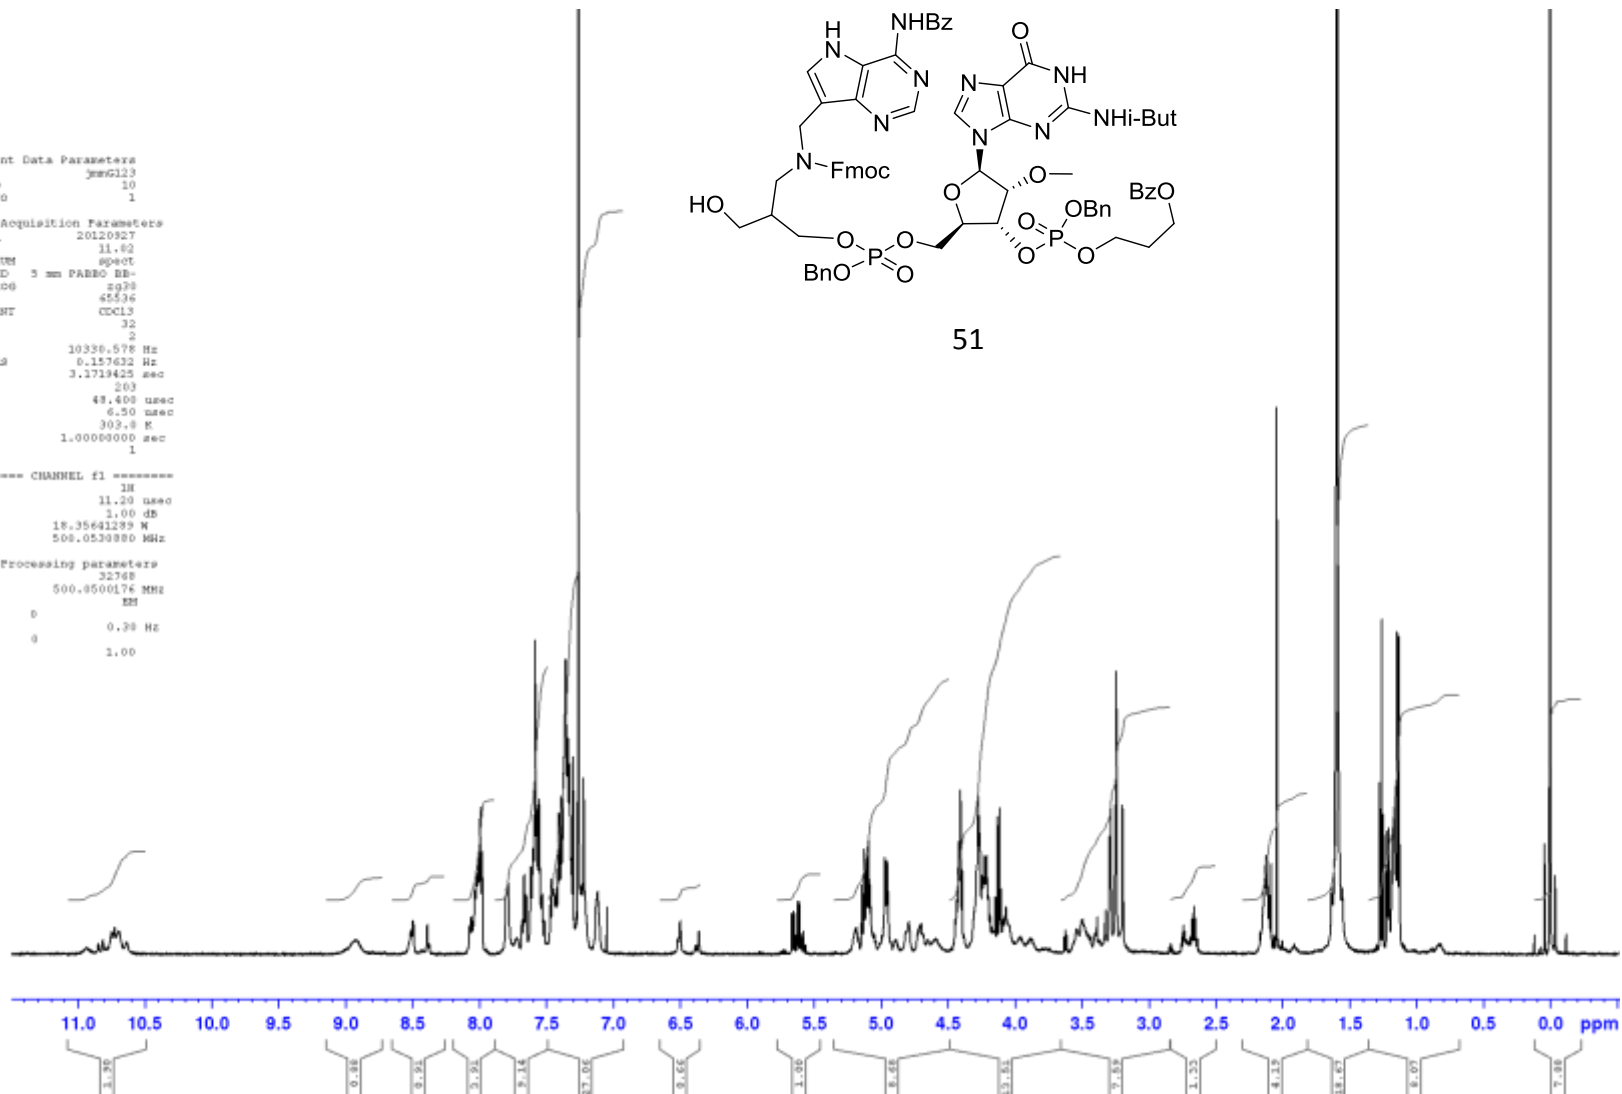

$^1\text{H}$  NMR  
500 MHz

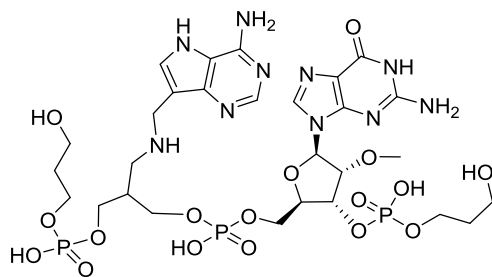

52

Current Data Parameters  
NAME jms6129  
EXPNO 10  
PROCNO 1

F2 - Acquisition Parameters  
Date\_ 20121011  
Time 11:58  
INSTRUM spect  
PROBHD 5 mm PABBO BB-  
PULPROG zgpg30  
TD 45536  
SOLVENT H2O  
NS 32  
DS 2  
SWH 10336.578 Hz  
FIDRES 0.157632 Hz  
AQ 3.1719425 sec  
RG 144  
CW 49.409 usec  
DE 6.50 usec  
TE 303.4 K  
DQ 1.0000000 sec  
TDO 1

----- CHANNEL f1 -----  
NUC1  $^1\text{H}$   
P1 11.20 usec  
PL1 1.00 dB  
PL1W 18.35641289 W  
RFOL 500.0530800 MHz

F2 - Processing parameters  
SI 32768  
SF 500.0499618 MHz  
NM  $^1\text{H}$   
SSB 0  
LA 0.39 Hz  
GB 0  
PC 1.00

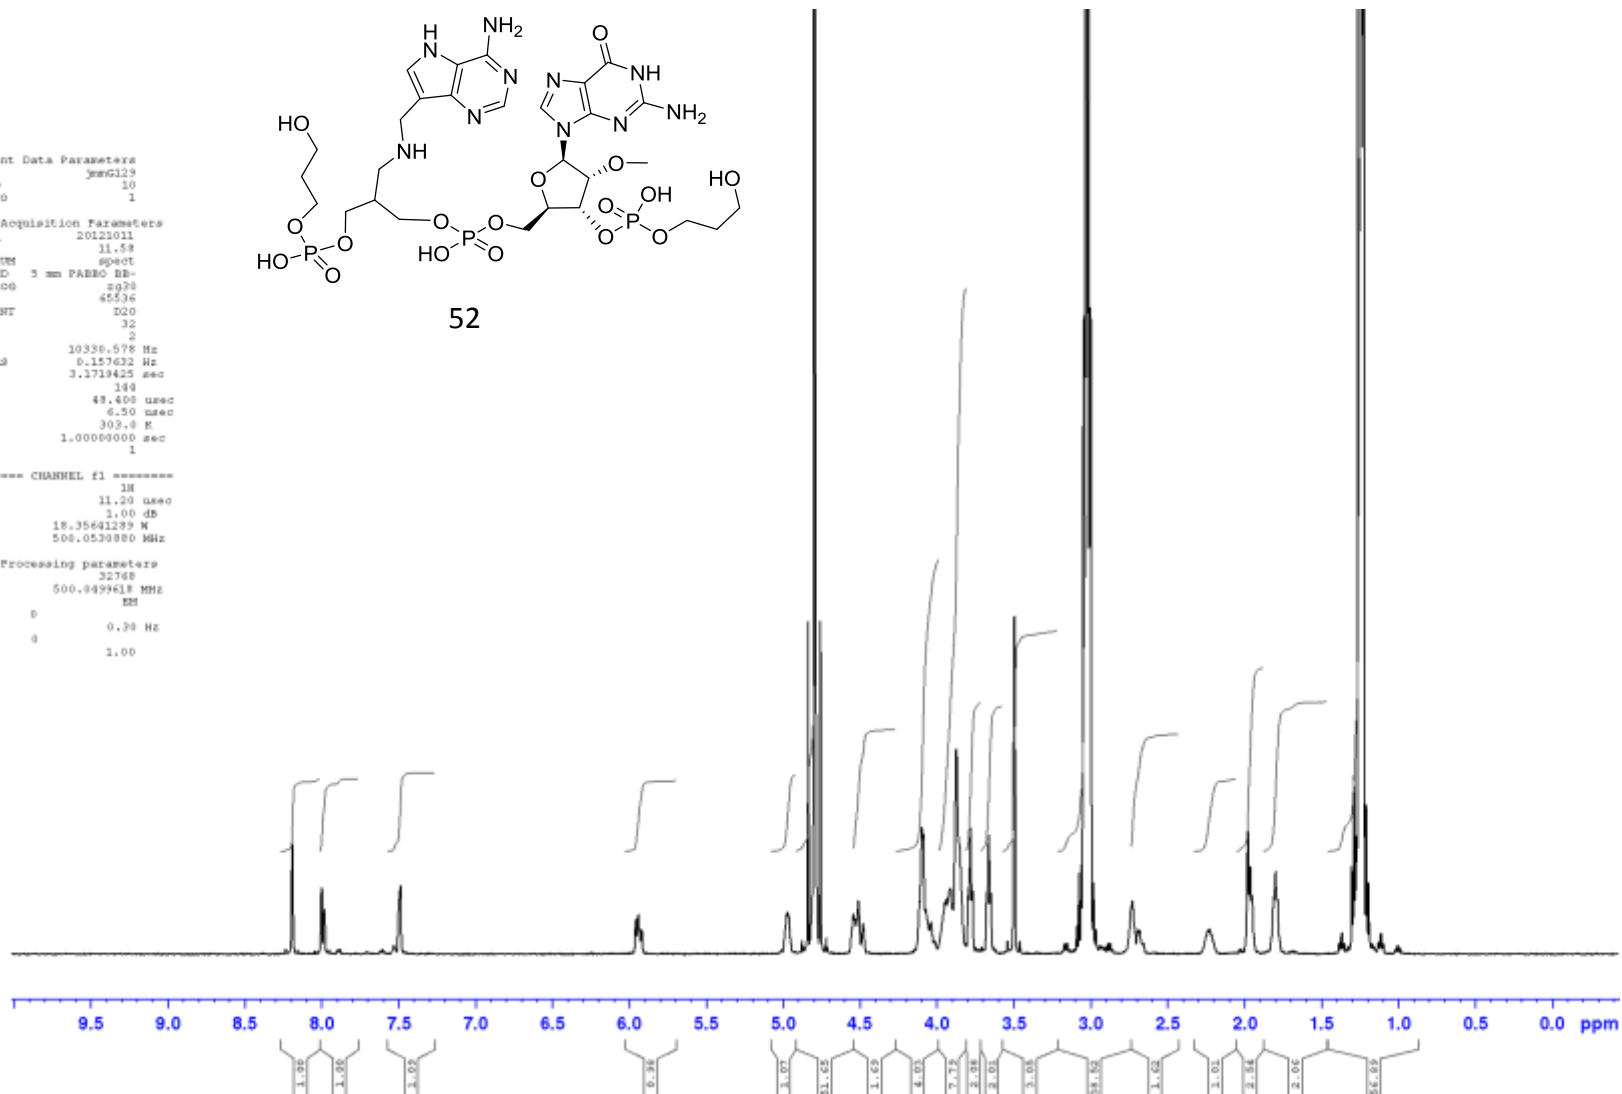

**<sup>13</sup>C NMR  
126 MHz**

```

Current Data Parameters
NAME          3000129
EXPNO         34
PROCNO        1

F2 - Acquisition Parameters
Date_         20121012
Time          1.09
INSTRUM       spect
PROBHD        5 mm PABO DE-
PULPROG       zgpg30
TD            65536
SOLVENT       D2O
NS            16000
DS            4
SWH           31250.000 Hz
FIDRES        0.476837 Hz
AQ            1.0485760 sec
RG            261
BW            14.800 usec
DE            15.08 usec
TE            300.2 K
D1            0.15000001 sec
d11           0.03000000 sec
TD0           1

----- CHANNEL f1 -----
NUC1          13C
P1            8.00 usec
PL1           -1.00 dB
PL1W          125.9628082 W
SFO1          125.7598755 MHz

===== CHANNEL f2 =====
CPCPRG2       waltz16
NUC2          1H
PCPD2         80.00 usec
P12           1.00 dB
PL12          19.08 dB
PL13          21.10 dB
PL1W          18.35641223 W
PL13W         0.35957363 W
PL13M         0.17988569 W
SFO2          500.0520002 MHz

F2 - Processing parameters
SI            32768
SF            125.7376750 MHz
WDW           EM
SSB           0
LB            3.00 Hz
GB            0
PC            1.60
  
```

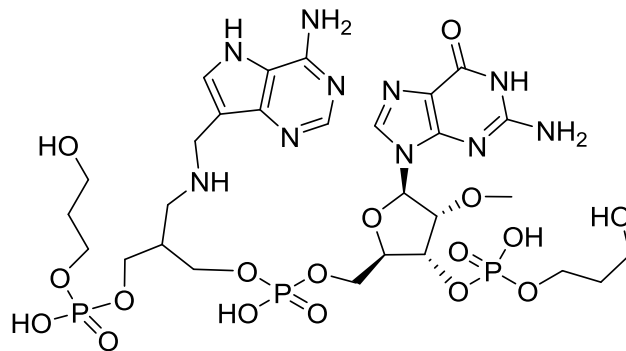

52

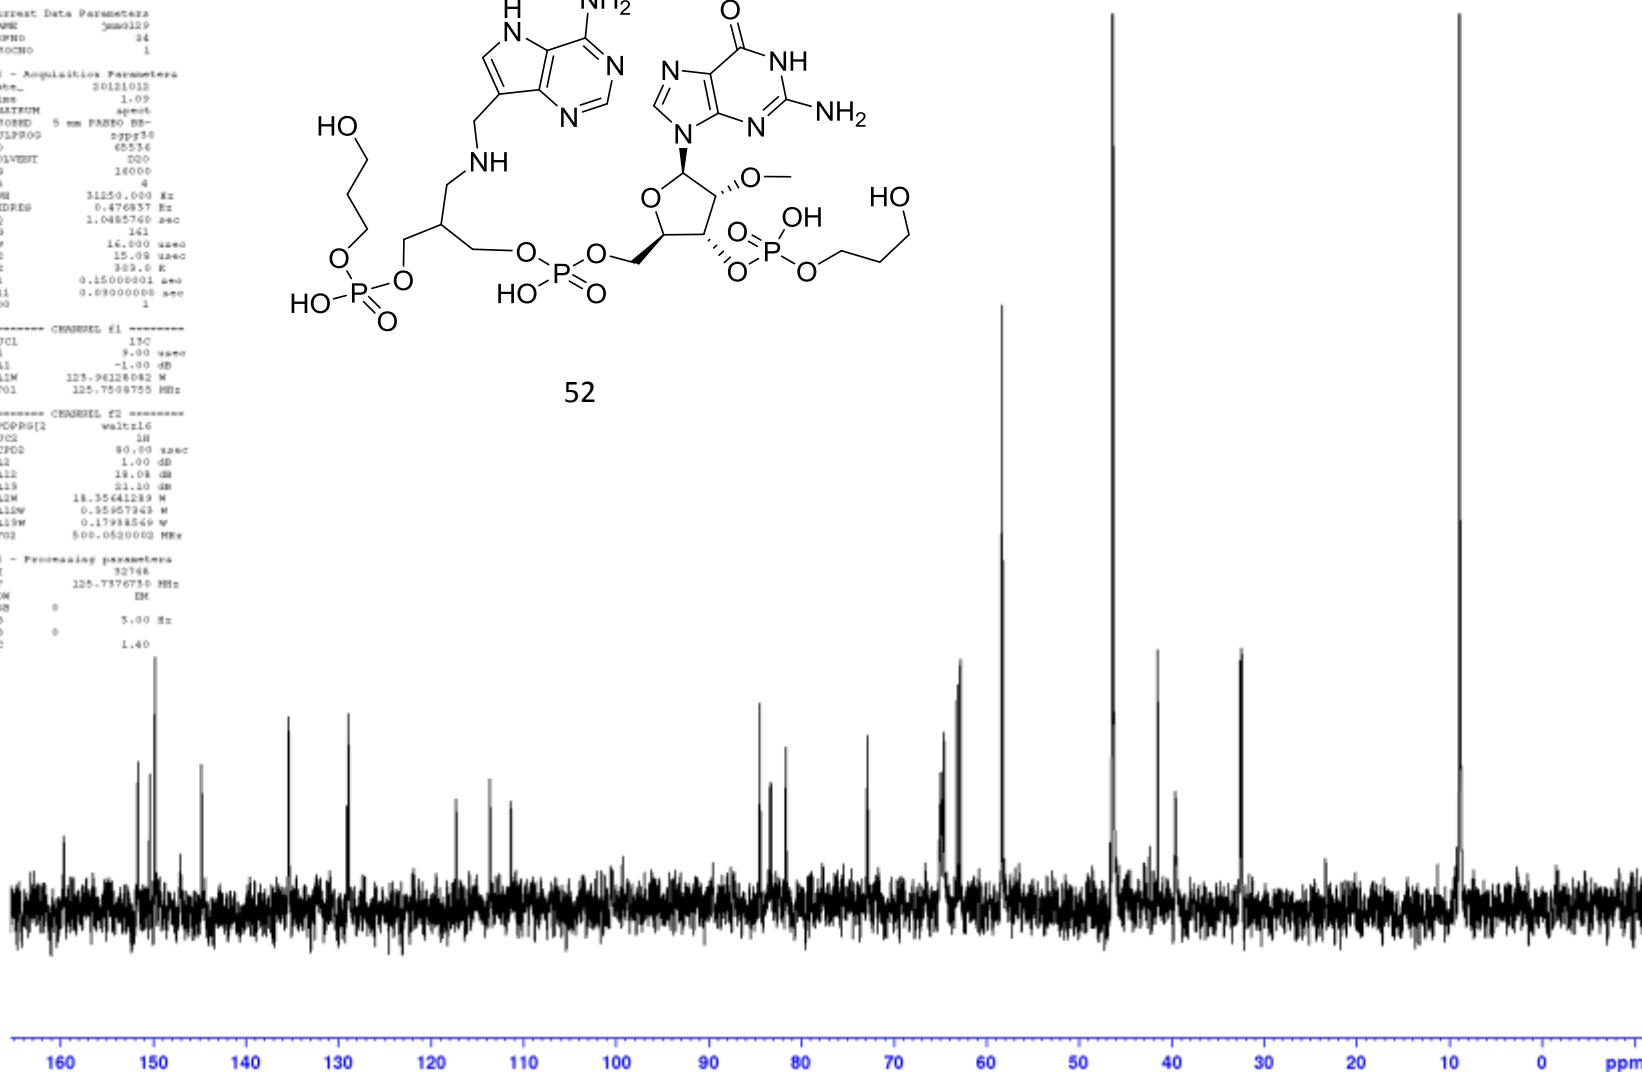

**<sup>31</sup>P NMR**  
**202 MHz**

```
Current Data Parameters
NAME      jmac129
EXPNO    11
PROCNO   1

F2 - Acquisition Parameters
Date_    2011011
Time     12:01
INSTRUM  spect
PROBHD   5 mm PABBO BB-
PULPROG  zgpg30
TD       131072
SOLVENT  D2O
RG       32
DS       4
SWH      81921.742 Hz
FIDRES   0.621962 Hz
AQ       0.8039083 sec
RG       2058
DW       6.123 usec
DE       6.50 usec
TE       300.2 K
D1       3.0000000 sec
d11      0.03000000 sec
TE0      1

----- CHANNEL f1 -----
NUC1     31P
P1       18.40 usec
P11      -1.00 dB
P1LW     55.50078523 W
SFO1     202.4340954 MHz

----- CHANNEL f2 -----
CHOPPRG2  multi2
NUC2      1H
PCPD2     80.00 usec
P12       1.00 dB
P1L2     19.09 dB
P1L3     21.10 dB
P1LW     18.35641289 W
P1L2W    0.35907363 W
P1L3W    0.17948569 W
SFO2     500.0520082 MHz

F2 - Processing parameters
SI        65536
SF        202.4239500 MHz
NCM       324
ZSN       0
LB        3.00 Hz
GB        0
PC        1.40
```

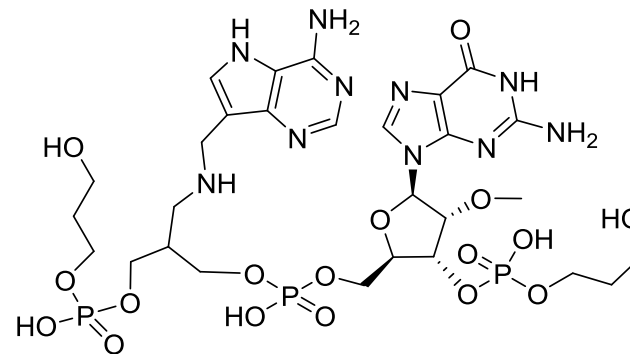

52

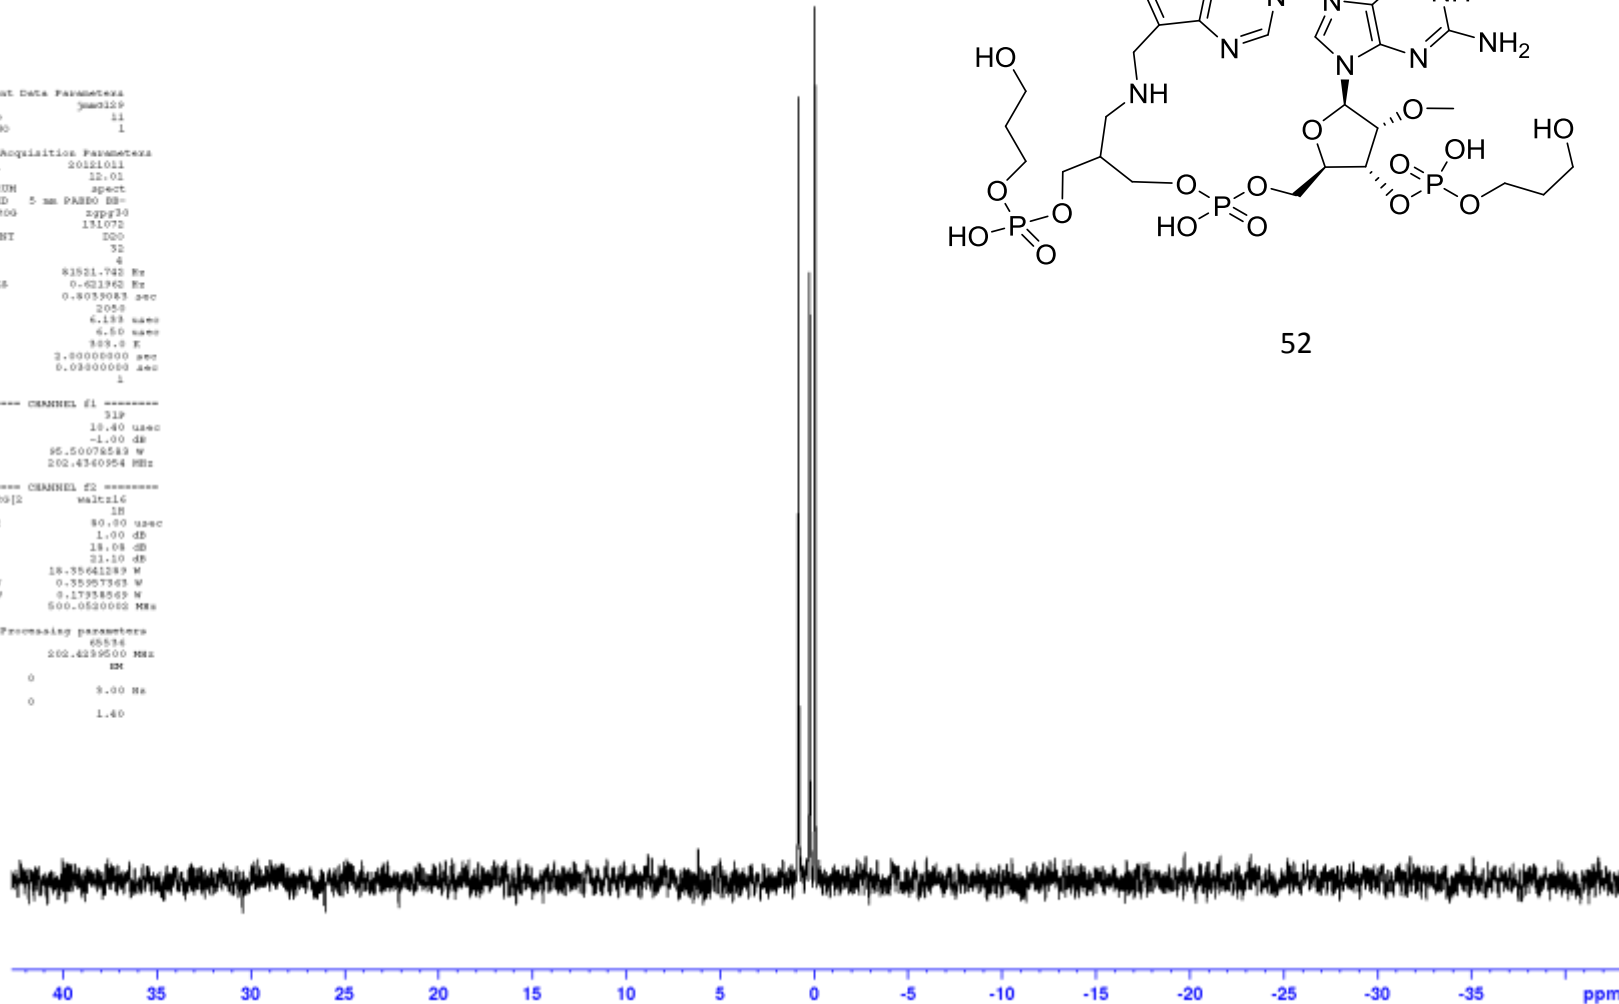

# HPLC

Data File I:\SHARED\... AGILENT AG03\CURRENT\JMM\JM129FINAL 2012-10-11 15-11-24\042-0401.D  
 Sample Name: JMG129

```

=====
Acq. Operator   : jmm                      Seq. Line   : 4
Acq. Instrument : Instrument 1              Location    : Vial 42
Injection Date  : 10/11/2012 4:53:57 PM    Inj         : 1
                                           Inj Volume  : 20.000 µl

Different Inj Volume from Sequence !      Actual Inj Volume : 2.000 µl
Acq. Method     : I:\SHARED\INSTRUMENT DATA\HPLC AGILENT AG03\CURRENT\JMM\JM129FINAL 2012-10-11 15-11-24\JMMUPNUCLEO.M
Last changed    : 10/11/2012 3:11:23 PM by jmm
Analysis Method : I:\SHARED\INSTRUMENT DATA\HPLC AGILENT AG03\CURRENT\METHODS\JMMUPNUCLEO.M
Last changed    : 10/11/2012 3:11:23 PM by jmm
Method Info     : standard method
  
```

Additional Info : Peak(s) manually integrated

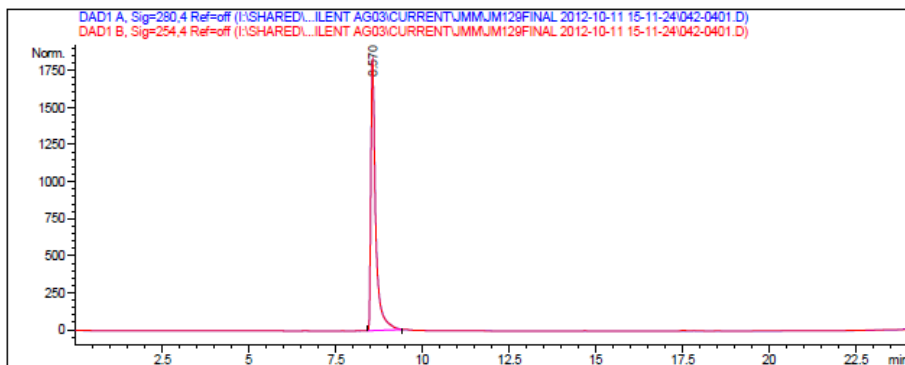

## Area Percent Report

```

=====
Sorted By      :      Signal
Multiplier:    :      1.0000
Dilution:      :      1.0000
Use Multiplier & Dilution Factor with ISTDs
  
```

Signal 1: DAD1 A, Sig=290.4 Ref=off

| Peak # | RetTime [min] | Type | Width [min] | Area [mAU*s] | Height [mAU] | Area %   |
|--------|---------------|------|-------------|--------------|--------------|----------|
| 1      | 8.570         | BB   | 0.1408      | 1.77039e4    | 1831.78650   | 100.0000 |

Totals :                    1.77039e4  1831.78650

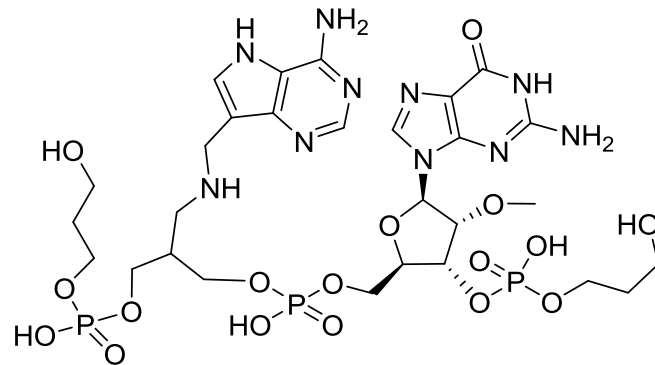

52
